# Supplementary material
Source: PubMed Central journal article supplement (PMC2736355)
Supplement: NIHMS125125-supplement-1_si_001.pdf [file NIHMS125125-supplement-1_si_001.pdf]

# Supplementary Information for

## Lipophilic $\beta$ -Cyclodextrin Cyclic-Nitrone Conjugate: Synthesis and Spin Trapping Studies

Yongbin Han,<sup>a</sup> Yangping Liu,<sup>b</sup> Antal Rockenbauer,<sup>c</sup> Jay L. Zweier,<sup>b</sup> Grégory Durand<sup>d</sup>  
and Frederick A. Villamena<sup>a,\*</sup>

Email: frederick.villamena@osumc.edu

|                   | <b>Table of contents</b>                                                                     | <b>Pages</b> |
|-------------------|----------------------------------------------------------------------------------------------|--------------|
| <b>Figure S1</b>  | <sup>1</sup> H NMR spectrum of compound <b>2</b> in CDCl <sub>3</sub>                        | <b>S3</b>    |
| <b>Figure S2</b>  | <sup>13</sup> C NMR spectrum of compound <b>2</b> in CDCl <sub>3</sub>                       | <b>S4</b>    |
| <b>Figure S3</b>  | Neat IR spectrum of compound <b>2</b>                                                        | <b>S5</b>    |
| <b>Figure S4</b>  | GC-MS spectrum of compound <b>2</b>                                                          | <b>S6</b>    |
| <b>Figure S5</b>  | HRMS spectrum of compound <b>2</b>                                                           | <b>S7</b>    |
| <b>Figure S6</b>  | <sup>1</sup> H NMR spectrum of compound <b>1</b> in D <sub>2</sub> O                         | <b>S8</b>    |
| <b>Figure S7</b>  | <sup>13</sup> C NMR spectrum of compound <b>1</b> in D <sub>2</sub> O                        | <b>S9</b>    |
| <b>Figure S8</b>  | HRMS spectrum of compound <b>1</b>                                                           | <b>S10</b>   |
| <b>Figure S9</b>  | <sup>1</sup> H NMR spectrum of compound <b>3a</b> and <b>3b</b> mixture in CDCl <sub>3</sub> | <b>S11</b>   |
| <b>Figure S10</b> | Neat IR spectrum of compound <b>3a</b> and <b>3b</b> mixture                                 | <b>S12</b>   |
| <b>Figure S11</b> | HRMS spectrum of compound <b>3a</b> and <b>3b</b> mixture                                    | <b>S13</b>   |
| <b>Figure S12</b> | HPLC trace for crude product of <b>4a</b> and <b>4b</b>                                      | <b>S14</b>   |
| <b>Figure S13</b> | <sup>1</sup> H NMR spectra of compound <b>4a</b> and <b>4b</b> in D <sub>2</sub> O           | <b>S15</b>   |
| <b>Figure S14</b> | HRMS spectrum of compound <b>4a</b>                                                          | <b>S16</b>   |
| <b>Figure S15</b> | HRMS spectrum of compound <b>4b</b>                                                          | <b>S17</b>   |
| <b>Figure S16</b> | MS-MS analysis of compound <b>4a</b> and <b>4b</b>                                           | <b>S18</b>   |
| <b>Figure S17</b> | <sup>1</sup> H NMR spectrum of compound <b>4b</b> in DMSO- <i>d</i> <sub>6</sub>             | <b>S19</b>   |
| <b>Figure S18</b> | <sup>13</sup> C NMR spectrum of compound <b>4b</b> in DMSO- <i>d</i> <sub>6</sub>            | <b>S20</b>   |
| <b>Figure S19</b> | HSQC spectrum of compound <b>4b</b> in DMSO- <i>d</i> <sub>6</sub>                           | <b>S21</b>   |
| <b>Figure S20</b> | TOCSY spectrum of compound <b>4b</b> in DMSO- <i>d</i> <sub>6</sub>                          | <b>S22</b>   |
| <b>Figure S21</b> | HSQC-COCSY spectrum of compound <b>4b</b> in DMSO- <i>d</i> <sub>6</sub>                     | <b>S23</b>   |
| <b>Figure S22</b> | HMBC spectrum of compound <b>4b</b> in DMSO- <i>d</i> <sub>6</sub>                           | <b>S24</b>   |

|                   |                                                                                                                                                                                     |               |
|-------------------|-------------------------------------------------------------------------------------------------------------------------------------------------------------------------------------|---------------|
| <b>Figure S23</b> | ROESY spectra of compounds a) <b>4a</b> and b) <b>4b</b> alone, and c) <b>4a</b> and d) <b>4b</b> in the presence of <i>l</i> -borneol in D <sub>2</sub> O at 25°C.                 | <b>S25</b>    |
| <b>Figure S24</b> | Induced Circular Dichroism spectra of 3.4 mM aqueous solutions of <b>4a</b> (a), <b>4b</b> (b), and <b>1</b> (c).                                                                   | <b>S26</b>    |
| <b>Figure S25</b> | X-band EPR spectra of <b>1</b> (20 mM) in the presence of (a) Fe <sup>2+</sup> /H <sub>2</sub> O <sub>2</sub> and (b) xanthine/xanthine oxidase.                                    | <b>S26</b>    |
| <b>Table S1</b>   | Relative bottom-of-the-well energies at the HF/3-21G* level of theory of the various isomers of <b>4a</b> and <b>4b</b> , and their respective O <sub>2</sub> <sup>-</sup> adducts. | <b>S27</b>    |
| <b>Figure S26</b> | Side and top views of the optimized geometries of ( <i>5S</i> )- <b>4b</b> at the HF/3-21G* level of theory and their relative bottom-of-the-well energies.                         | <b>S28</b>    |
| <b>Figure S27</b> | Side and top views of the optimized geometries of ( <i>5S</i> )- <b>4a</b> at the HF/3-21G* level of theory and their relative bottom-of-the-well energies.                         | <b>S29</b>    |
| <b>Figure S28</b> | Side and top views of the optimized geometries of ( <i>5R</i> )- <b>4a</b> at the HF/3-21G* level of theory and their relative bottom-of-the-well energies.                         | <b>S30</b>    |
| <b>Figure S29</b> | Optimized geometries of the various isomers of ( <i>5R</i> )- <b>4b-OOH</b> at the HF/3-21G* level of theory and their relative bottom-of-the-well energies.                        | <b>S31</b>    |
| <b>Figure S30</b> | Optimized geometries of the various isomers of ( <i>5S</i> )- <b>4b-OOH</b> at the HF/3-21G* level of theory and their relative bottom-of-the-well energies.                        | <b>S32</b>    |
| <b>Figure S31</b> | Optimized geometries of the various isomers of ( <i>5R</i> )- <b>4a-OOH</b> at the HF/3-21G* level of theory and their relative bottom-of-the-well energies.                        | <b>S33</b>    |
| <b>Figure S32</b> | Optimized geometries of the various isomers of ( <i>5S</i> )- <b>4a-OOH</b> at the HF/3-21G* level of theory and their relative bottom-of-the-well energies.                        | <b>S34</b>    |
| <b>Figure S33</b> | Optimized geometries of the R isomers of <b>4b/4a</b> ---borneol complex at the HF/3-21G* level of theory and their relative bottom-of-the-well energies.                           | <b>S35</b>    |
| <b>Figure S34</b> | Optimized geometries of the S isomers of <b>4b/4a</b> ---borneol complex at the HF/3-21G* level of theory and their relative bottom-of-the-well energies.                           | <b>S36</b>    |
|                   | Cartesian coordinates for the aqueous phase geometries for <b>4a</b> and <b>4b</b>                                                                                                  | <b>S37-51</b> |
|                   | Cartesian coordinates for the aqueous phase geometries for <b>4a-OOH</b> and <b>4b-OOH</b>                                                                                          | <b>S52-82</b> |
|                   | Cartesian coordinates for the aqueous phase geometries for <b>4a-b</b> --- <b>Borneol</b>                                                                                           | <b>S82-99</b> |
|                   | <b>Complexes</b>                                                                                                                                                                    |               |
|                   | General Experimental Procedures                                                                                                                                                     | <b>S100-</b>  |
|                   |                                                                                                                                                                                     | <b>S101</b>   |
|                   | Complete References for 3, 23, 33 and 61                                                                                                                                            | <b>S101</b>   |

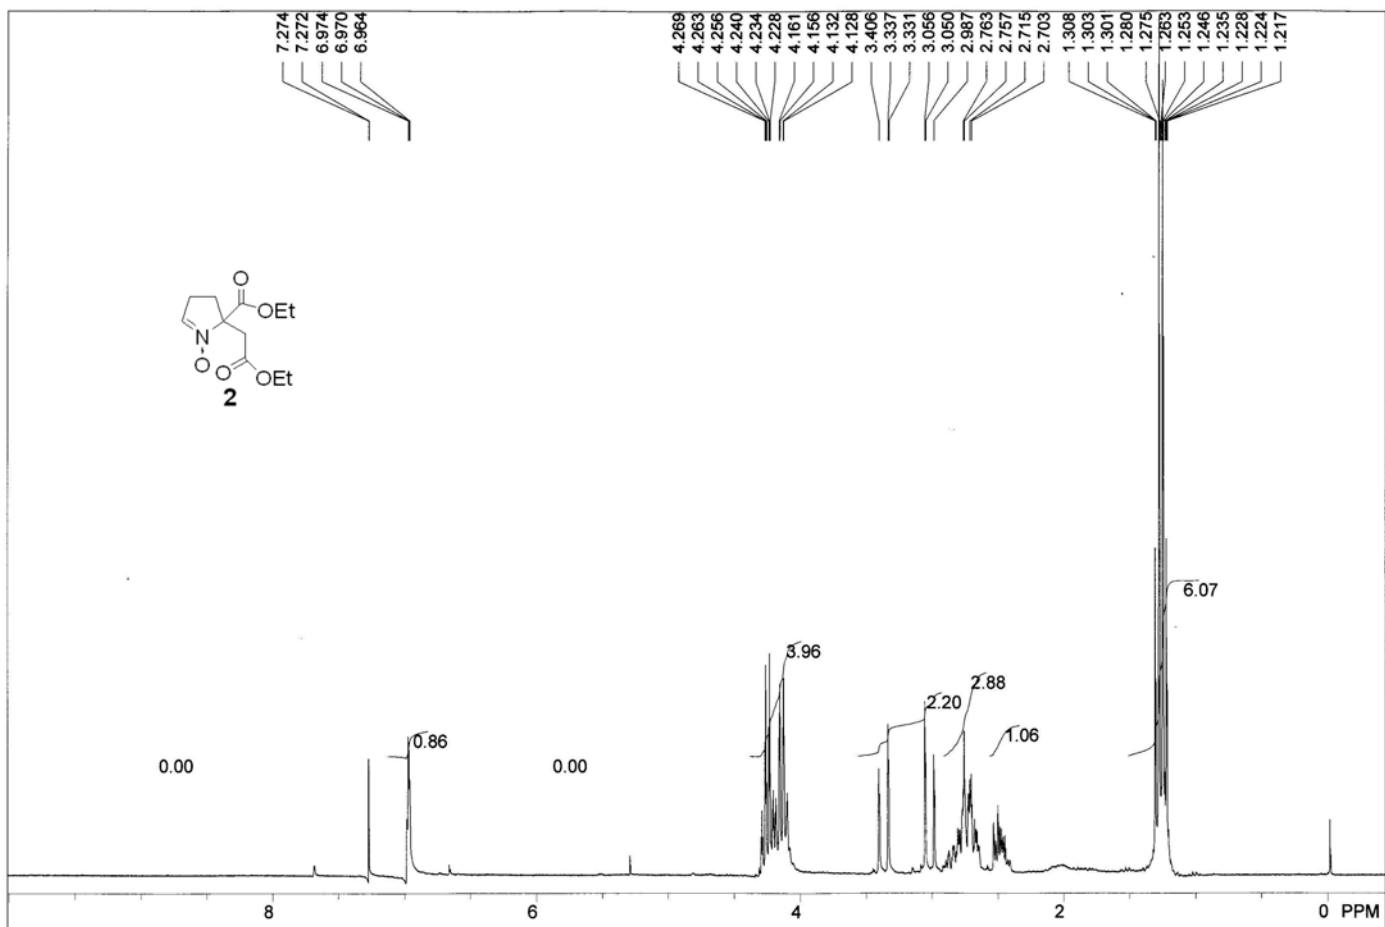

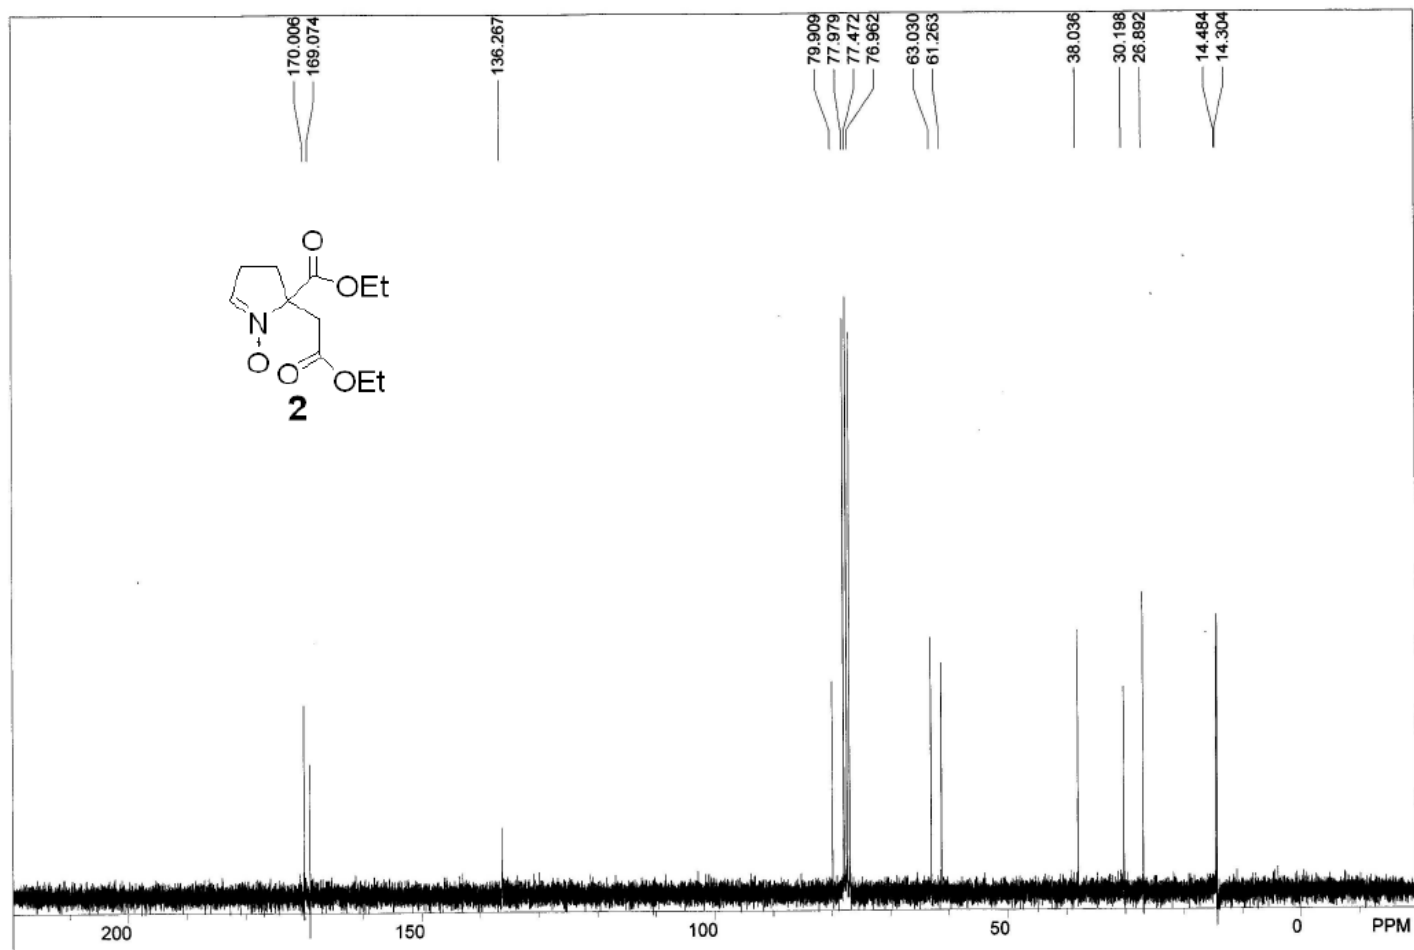

Figure S2.  $^{13}\text{C}$  NMR spectrum of compound **2** in  $\text{CDCl}_3$

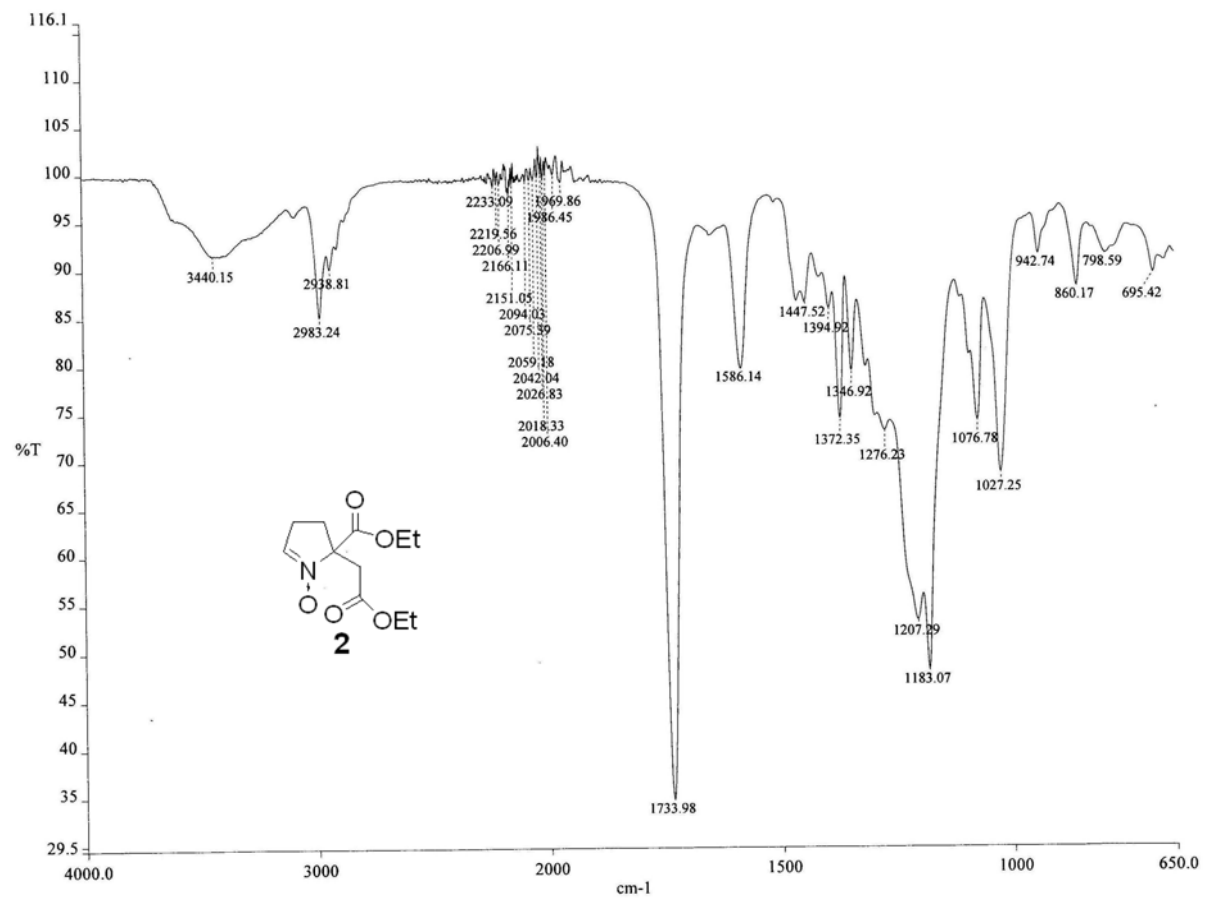

**Figure S3.** Neat IR spectrum of compound **2**

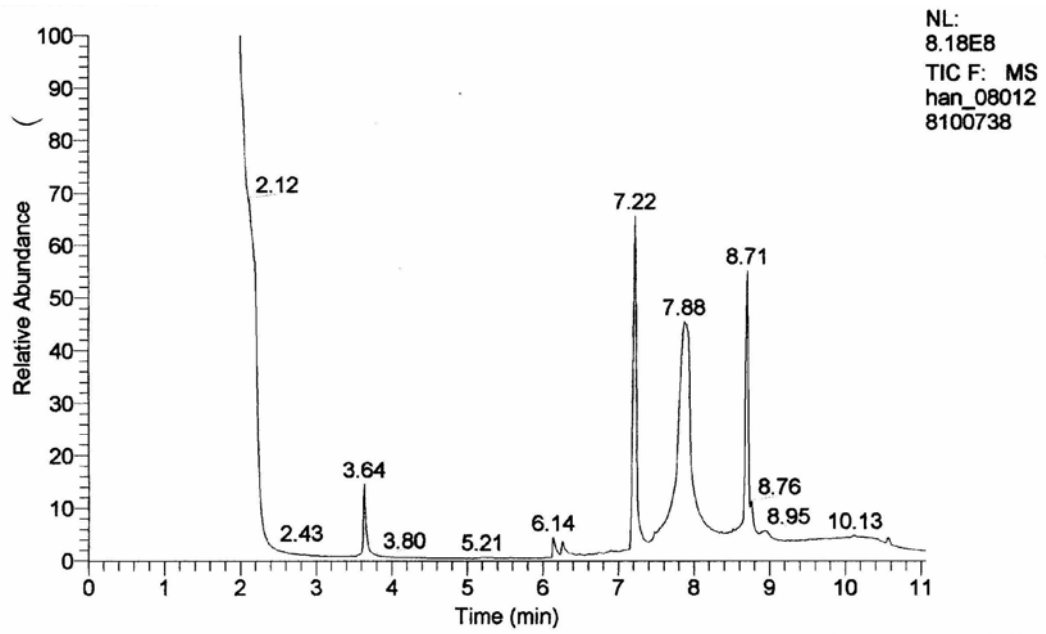

#080128100738 #704 RT: 7.87 AV: 1 NL: 3.47E7  
 Full ms [ 35.00-700.00]

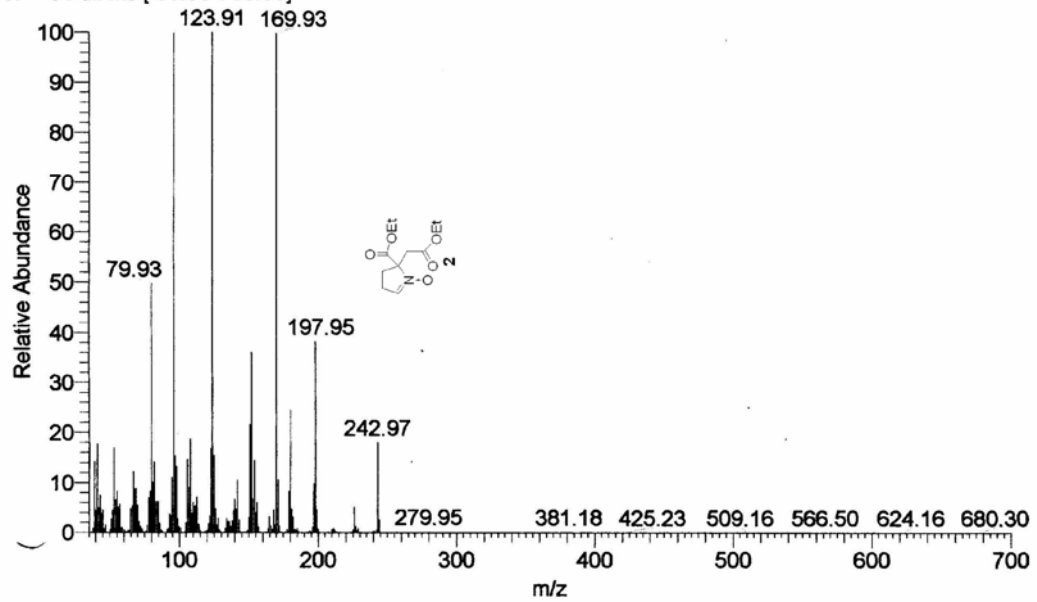

Figure S4. GC-MS spectrum of compound 2

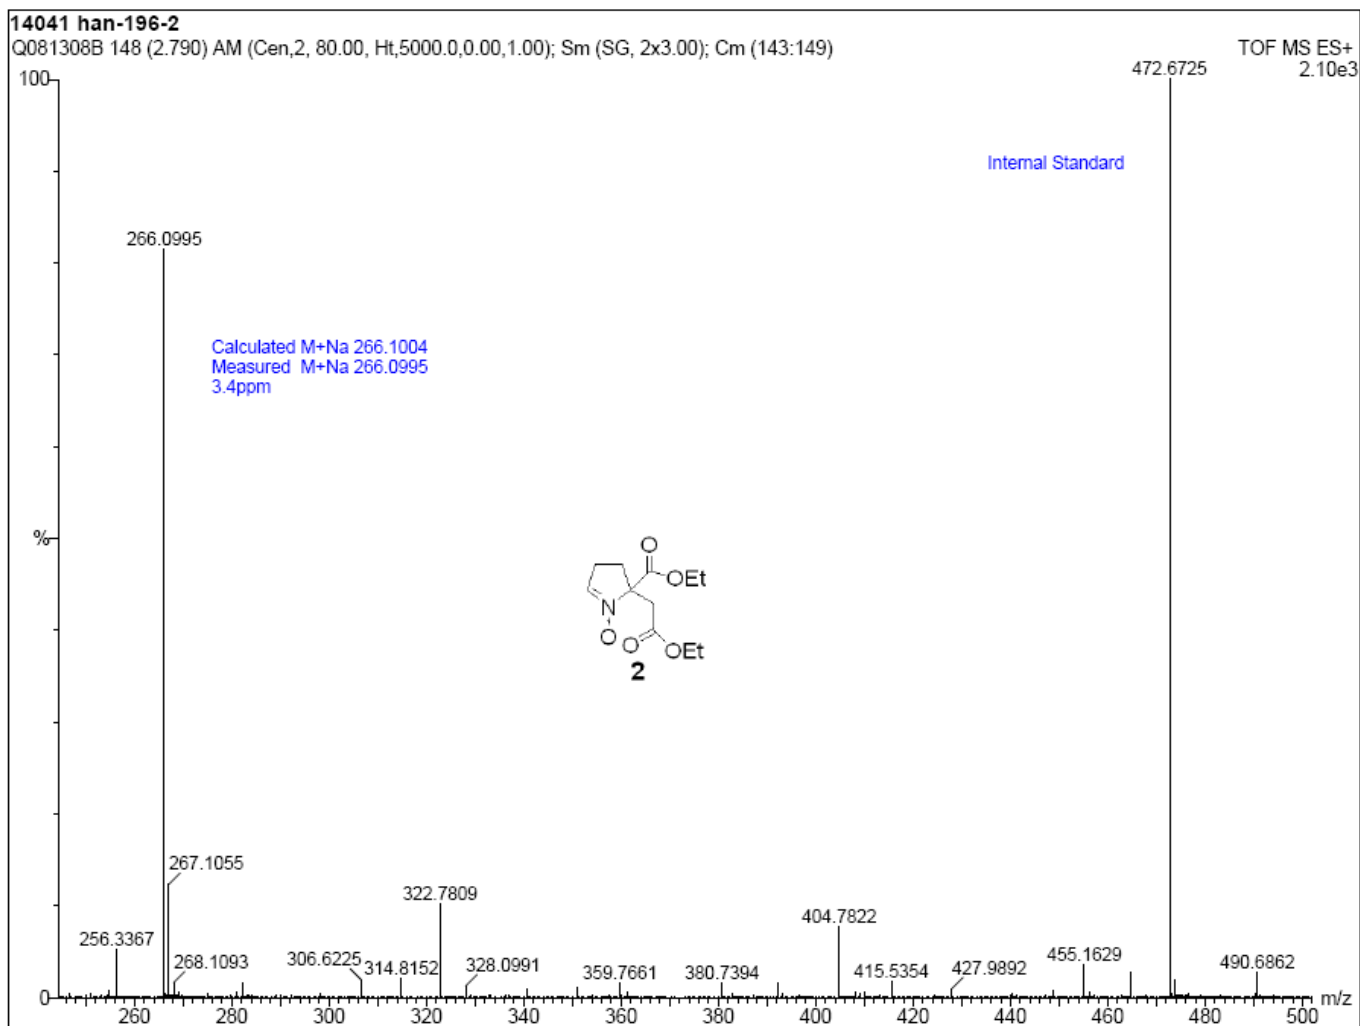

Figure S5. HRMS spectrum of compound 2

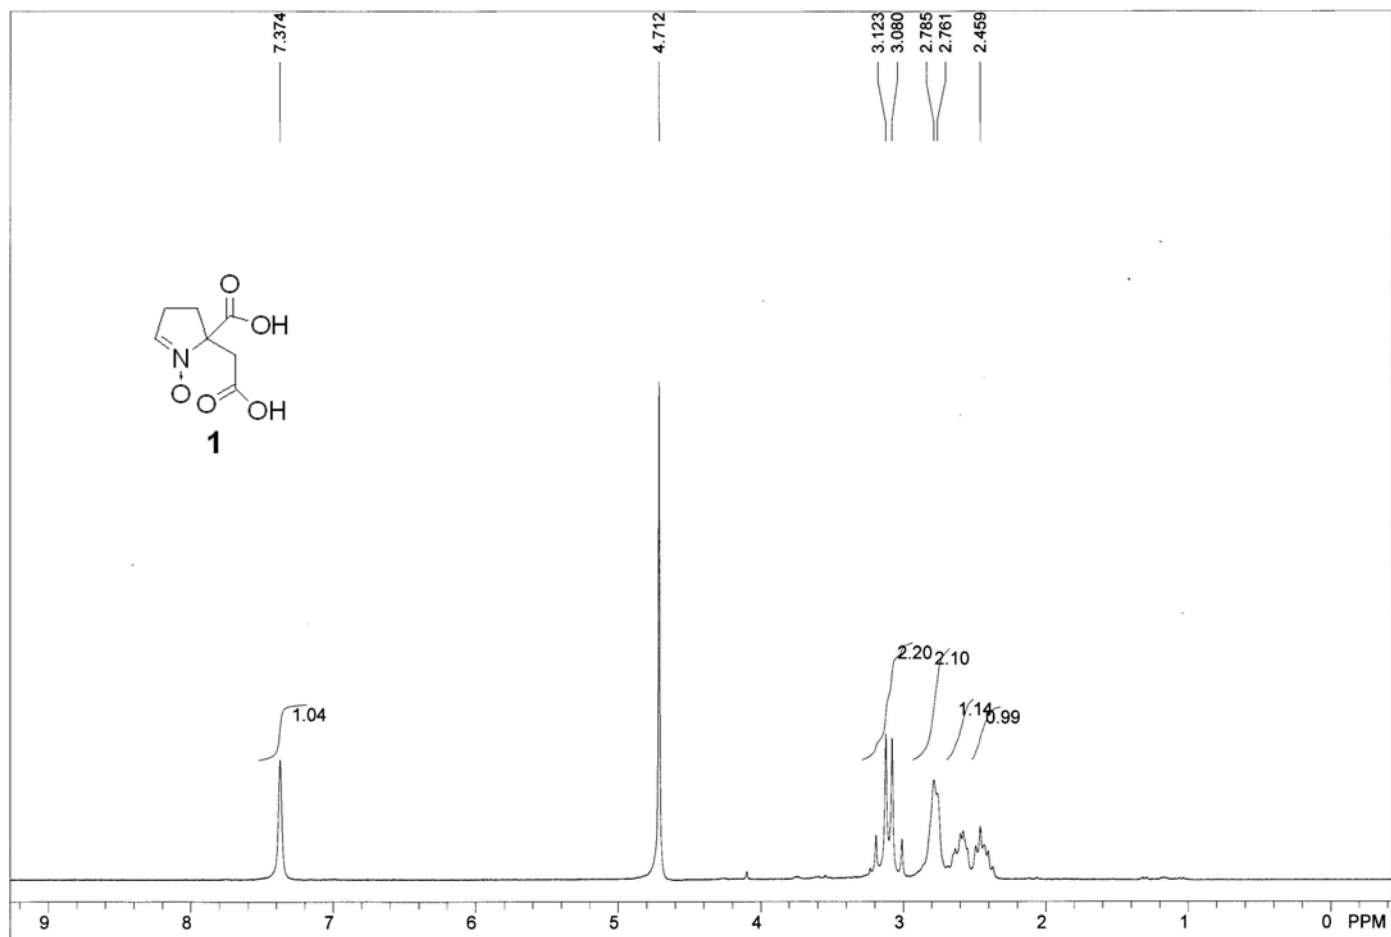

Figure S6. <sup>1</sup>H NMR spectrum of compound **1** in D<sub>2</sub>O



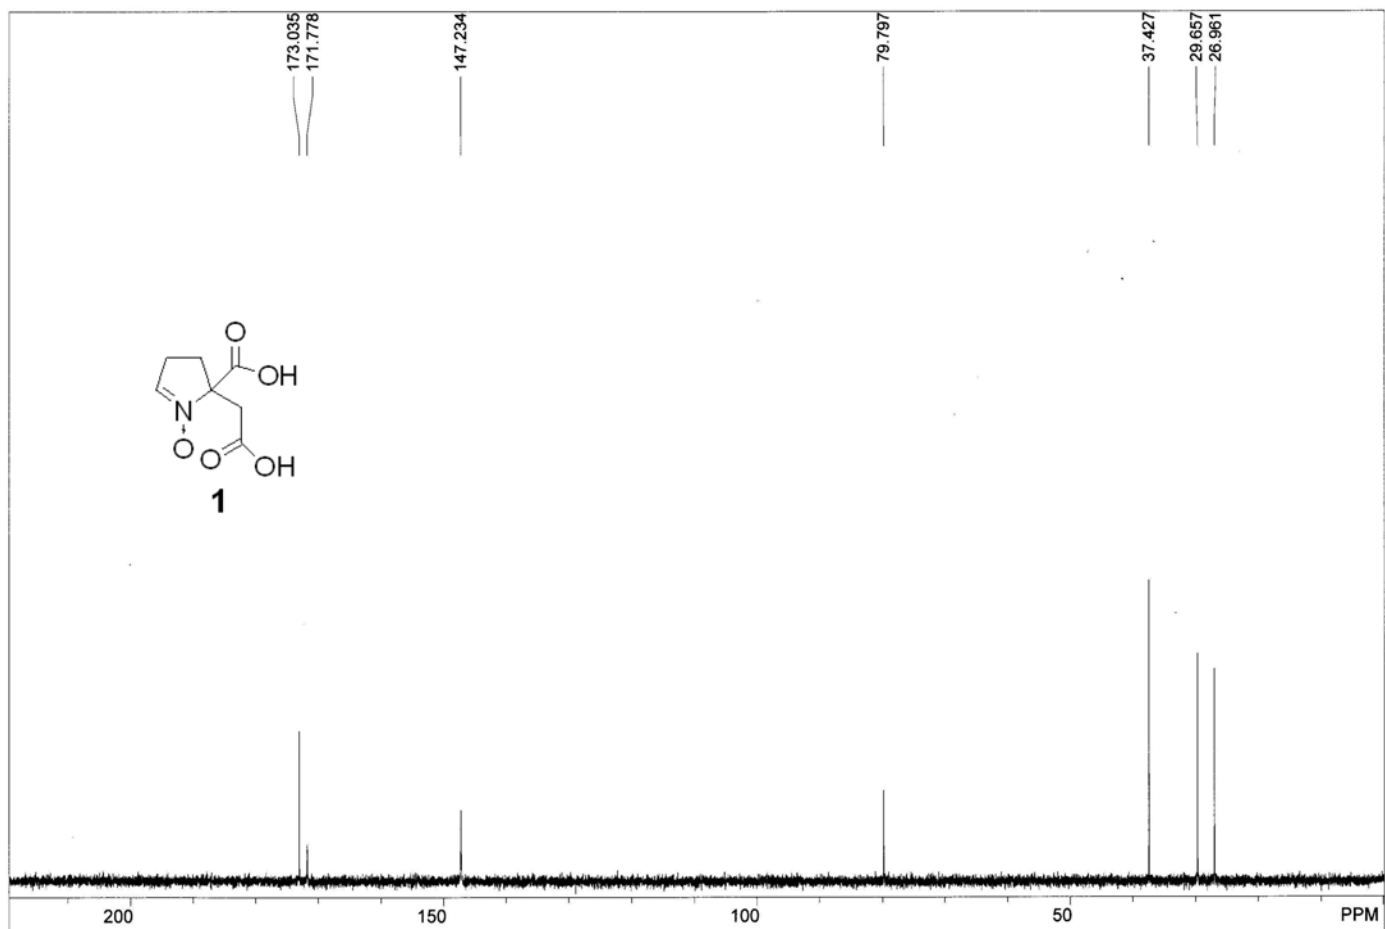

Figure S7.  $^{13}\text{C}$  NMR spectrum of compound **1** in  $\text{D}_2\text{O}$

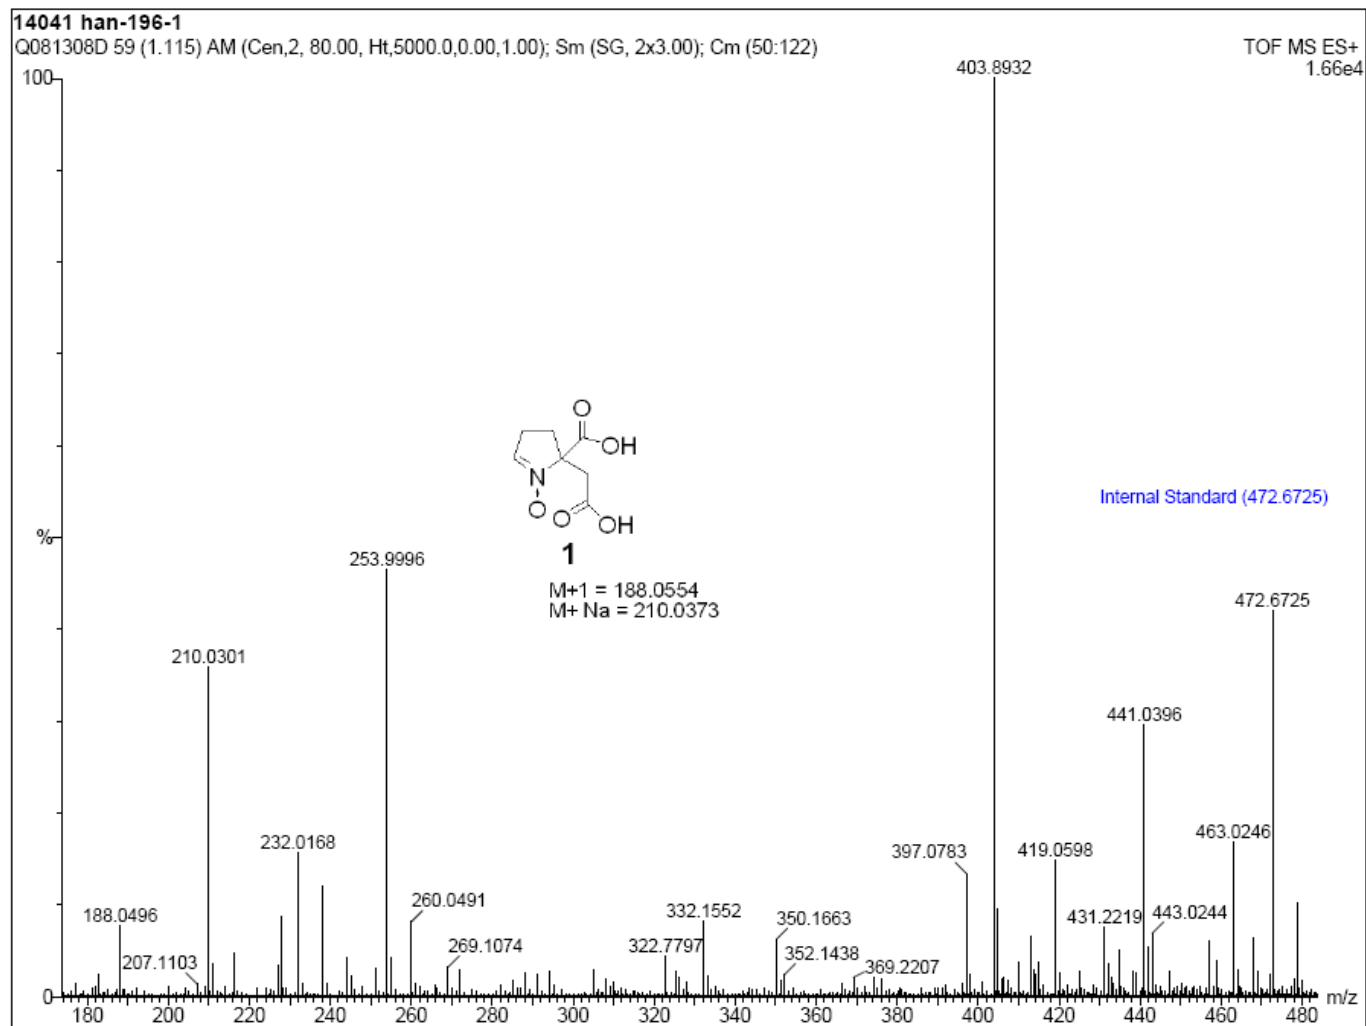

Figure S8. HRMS spectrum of compound **1**

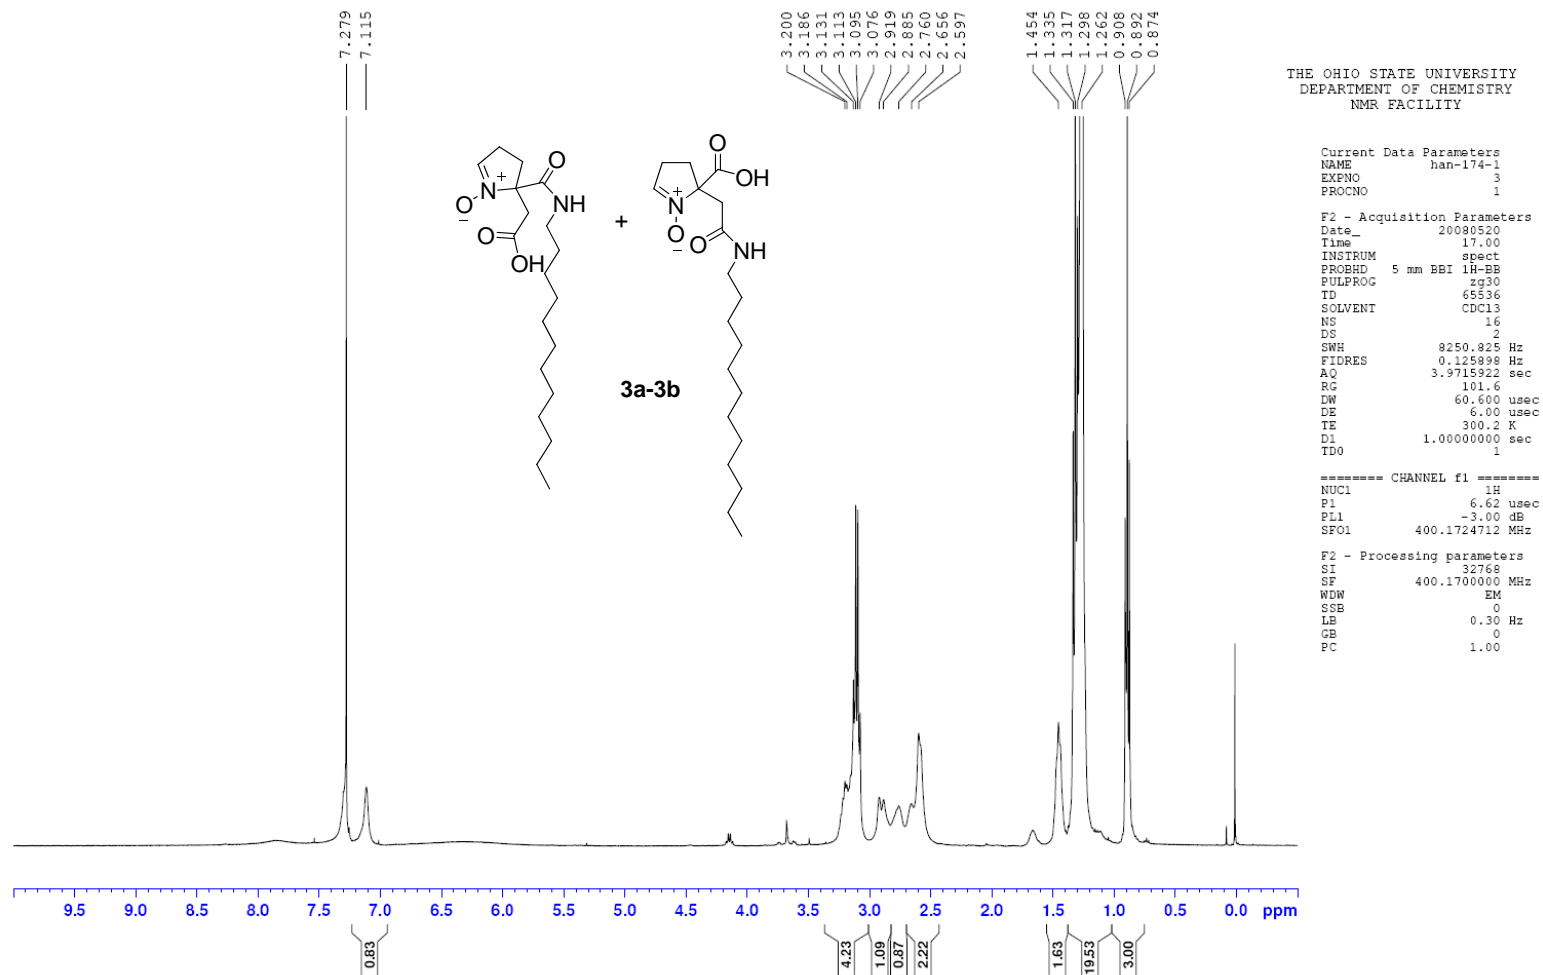

**Figure S9.**  $^1\text{H}$  NMR spectrum of compound **3a** and **3b** mixture in  $\text{CDCl}_3$

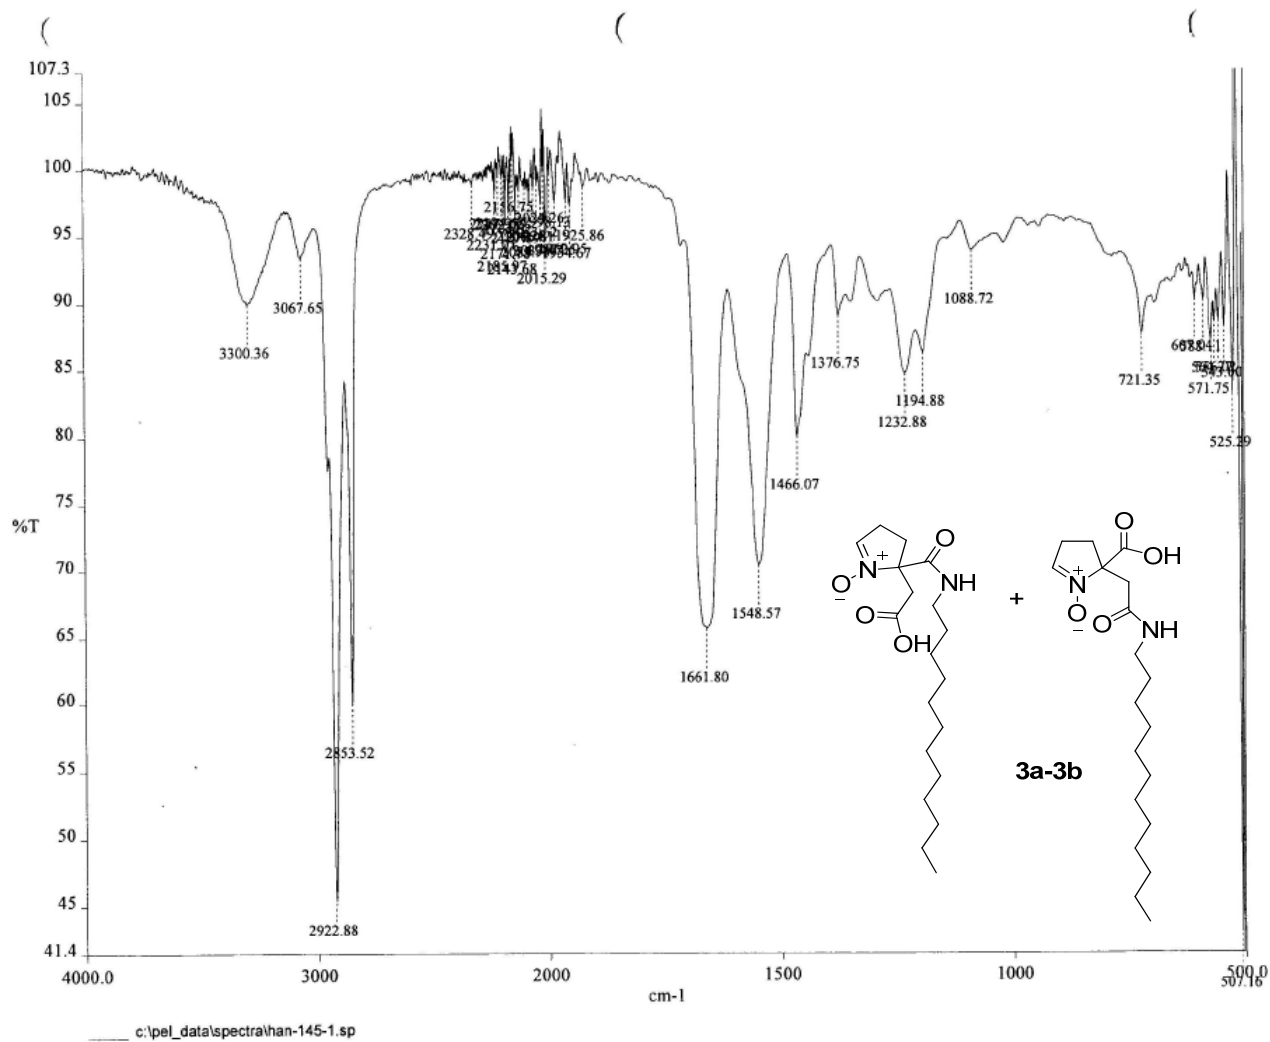

**Figure S10.** Neat IR spectrum of compound **3a** and **3b** mixture

O032108q\_080321155955 #1 RT: 0.00 AV: 1 NL: 1.27E8  
T: FTMS + p ESI Full ms [100.00-2000.00]

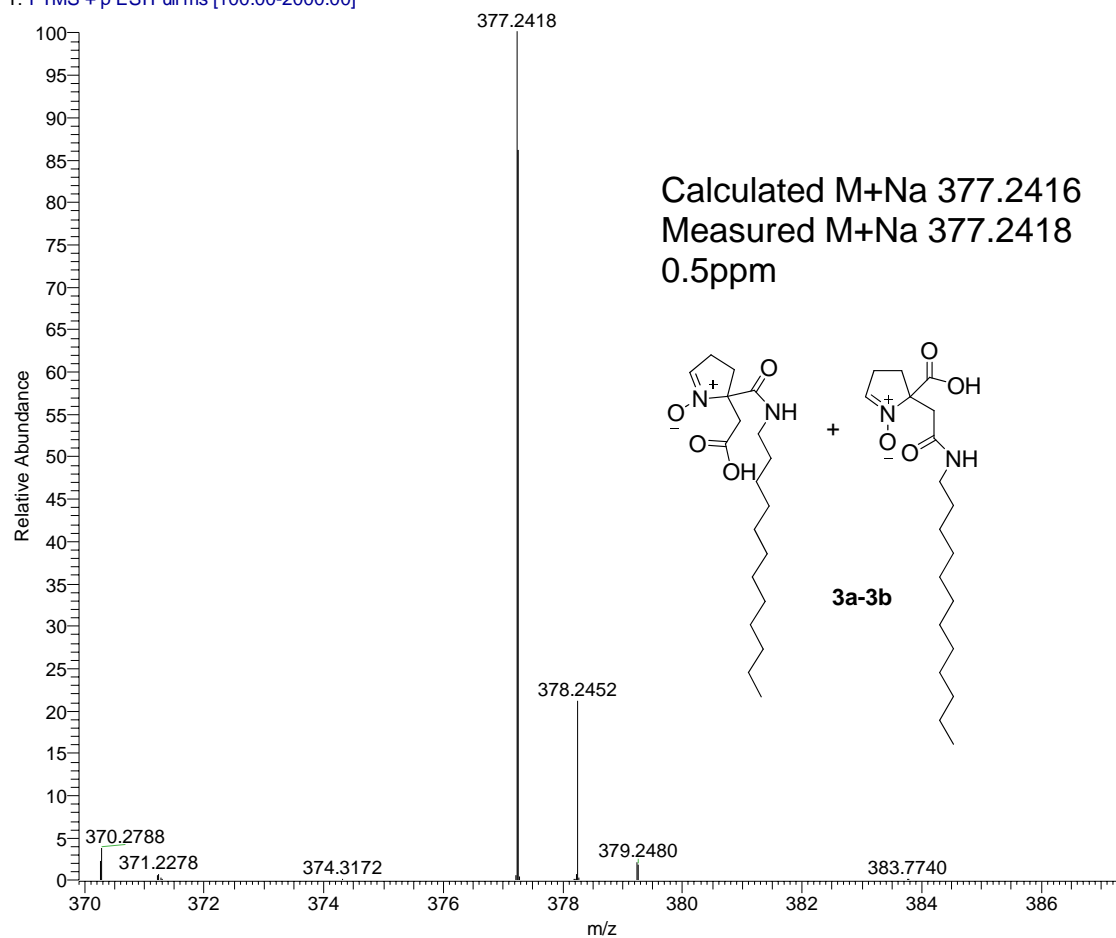

**Figure S11.** HRMS spectrum of compound **3a** and **3b** mixture

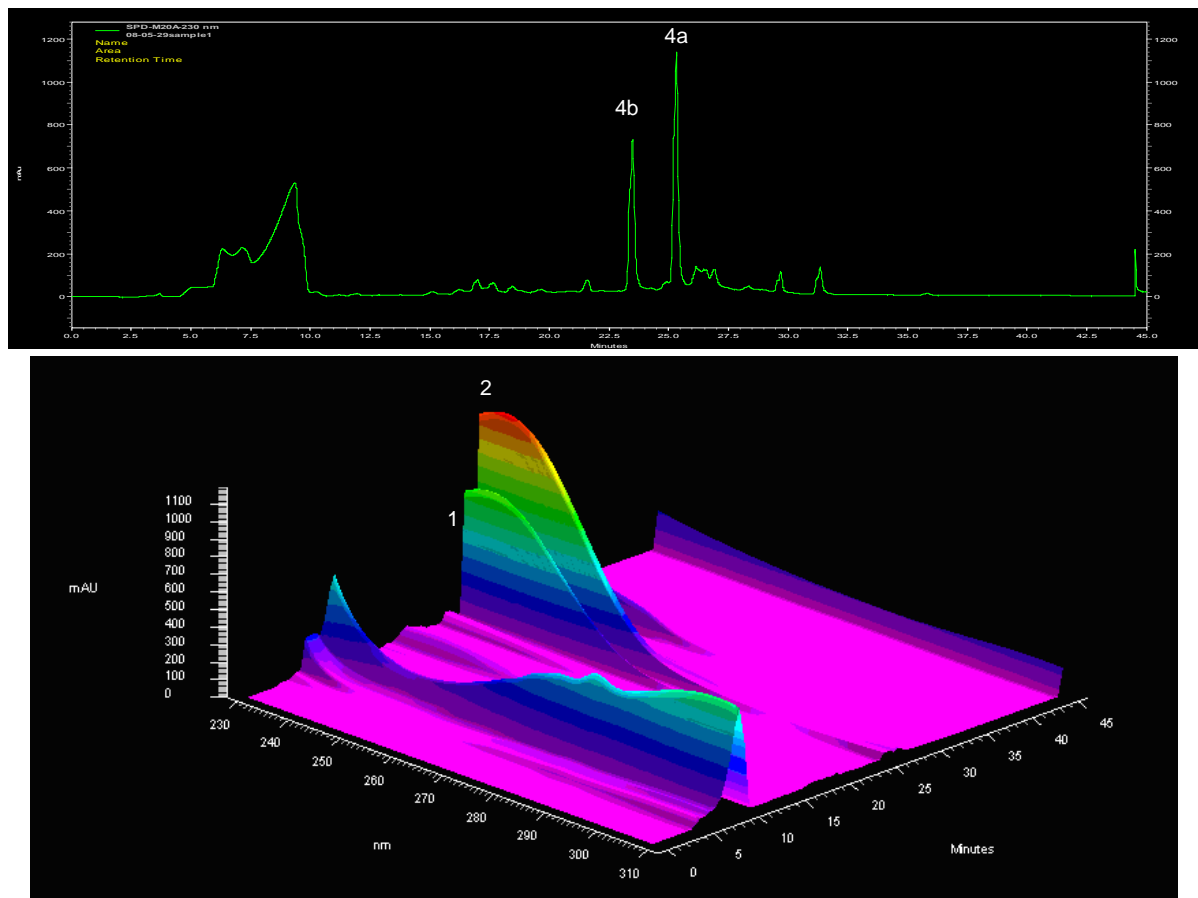

**Figure S12.** HPLC trace for crude product of **4a** and **4b** (before purification)

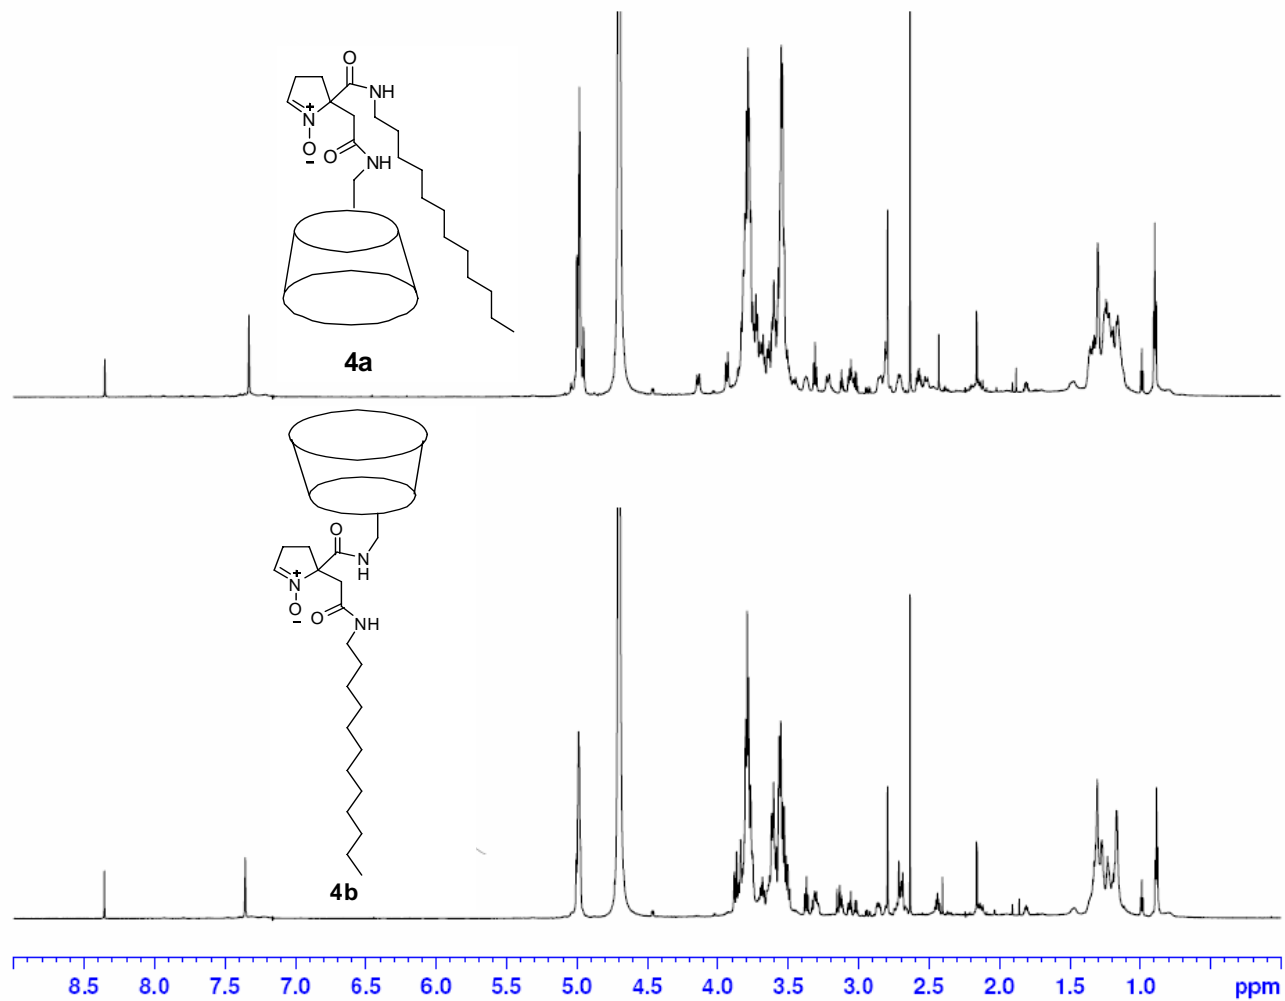

**Figure S13.**  $^1\text{H}$  NMR spectra of compound **4a** and **4b** in  $\text{D}_2\text{O}$

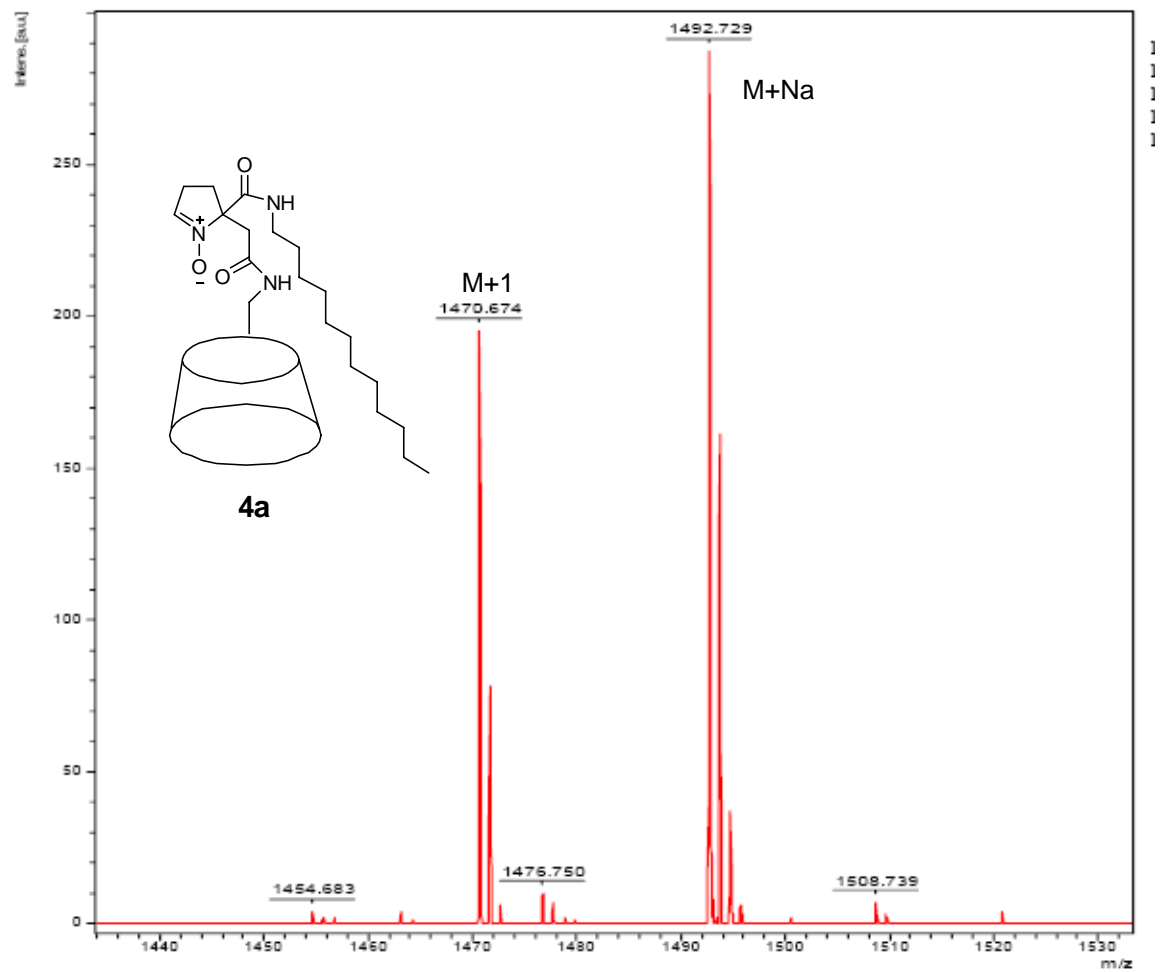

**Figure S14.** HRMS spectrum of compound **4a**



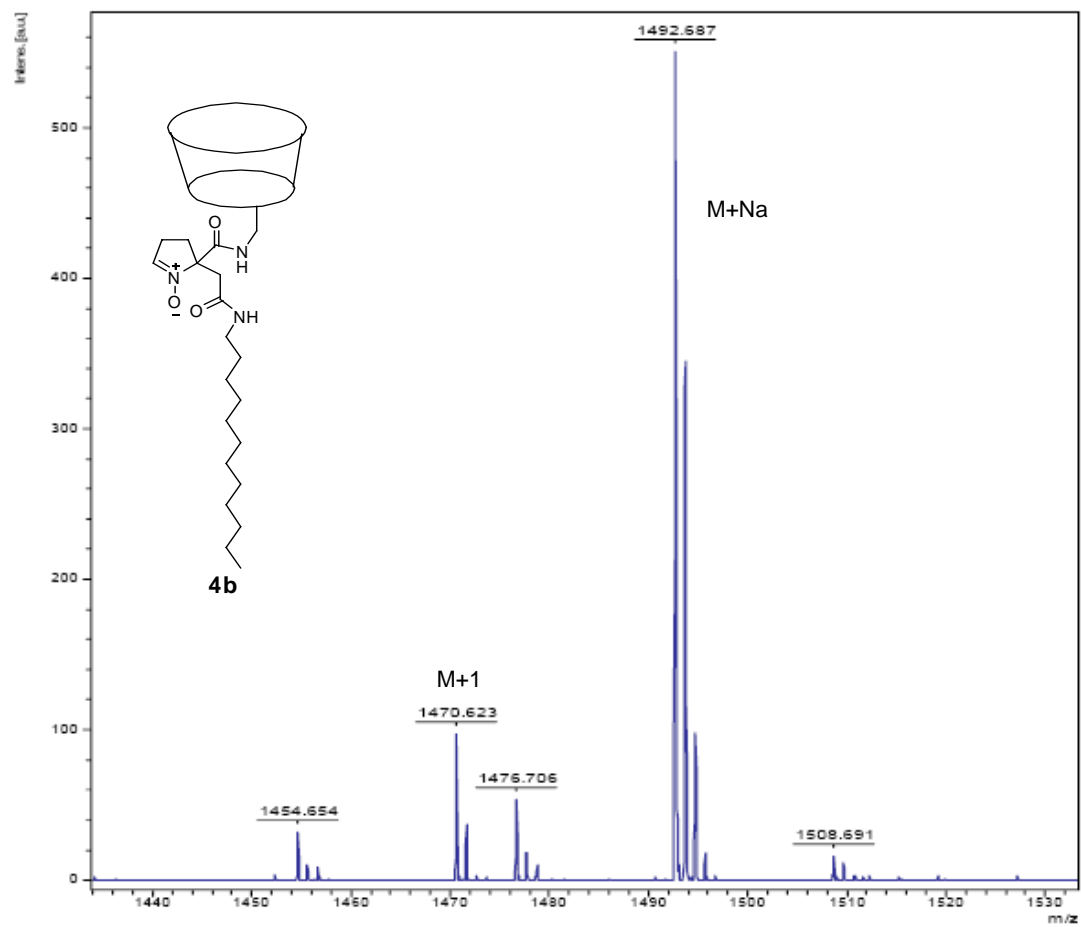

**Figure S15.** HRMS spectrum of compound **4b**

O062408L\_080624063317 #4-29 RT: 0.02-0.16 Av: 26 NL: 1.23E4  
T: ITMS + c NSI Full ms2 1492.60@cid25.00 [410.00-2000.00]

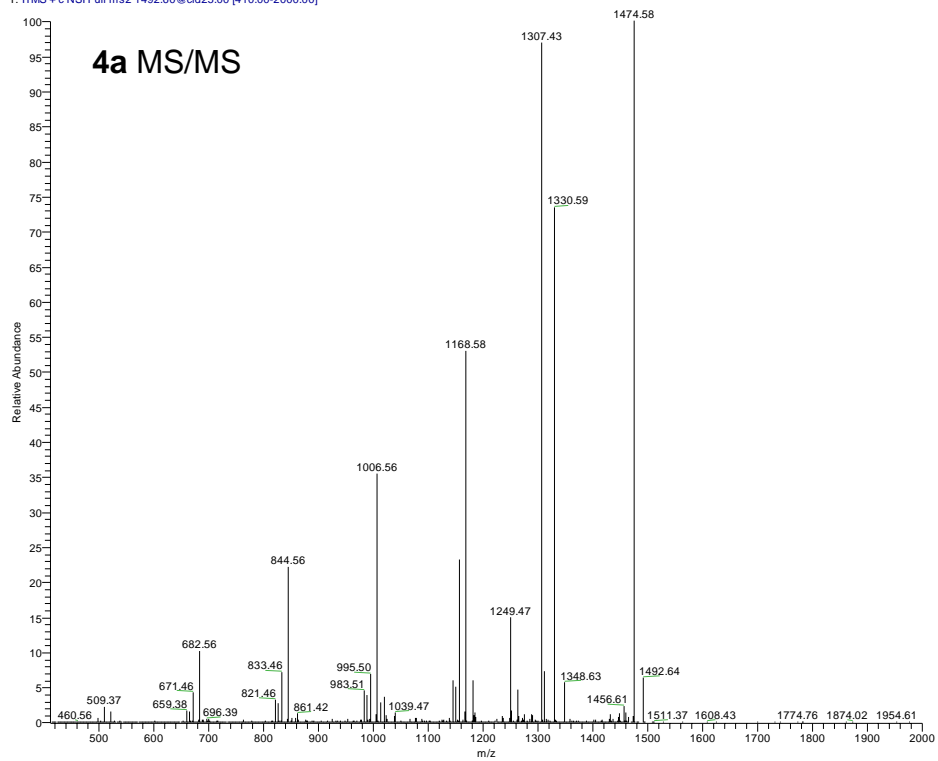

O062408G\_080624063317 #2-29 RT: 0.01-0.17 Av: 28 NL: 1.42E4  
T: ITMS + c NSI Full ms2 1492.80@cid25.00 [410.00-2000.00]

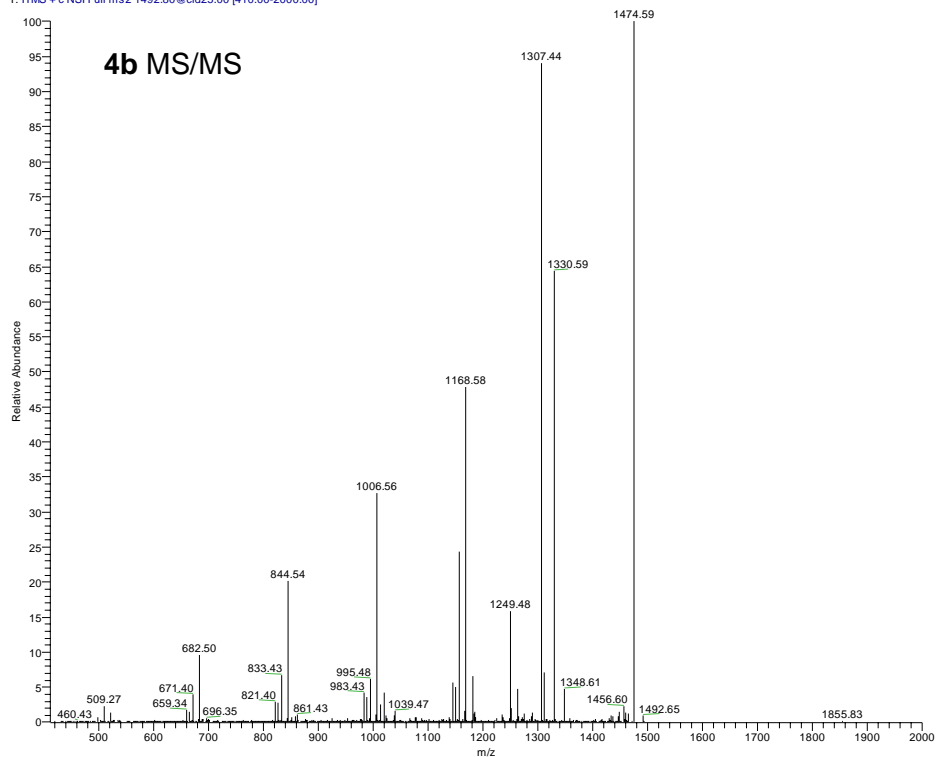

Figure S16. MS - MS analysis of compound 4a and 4b

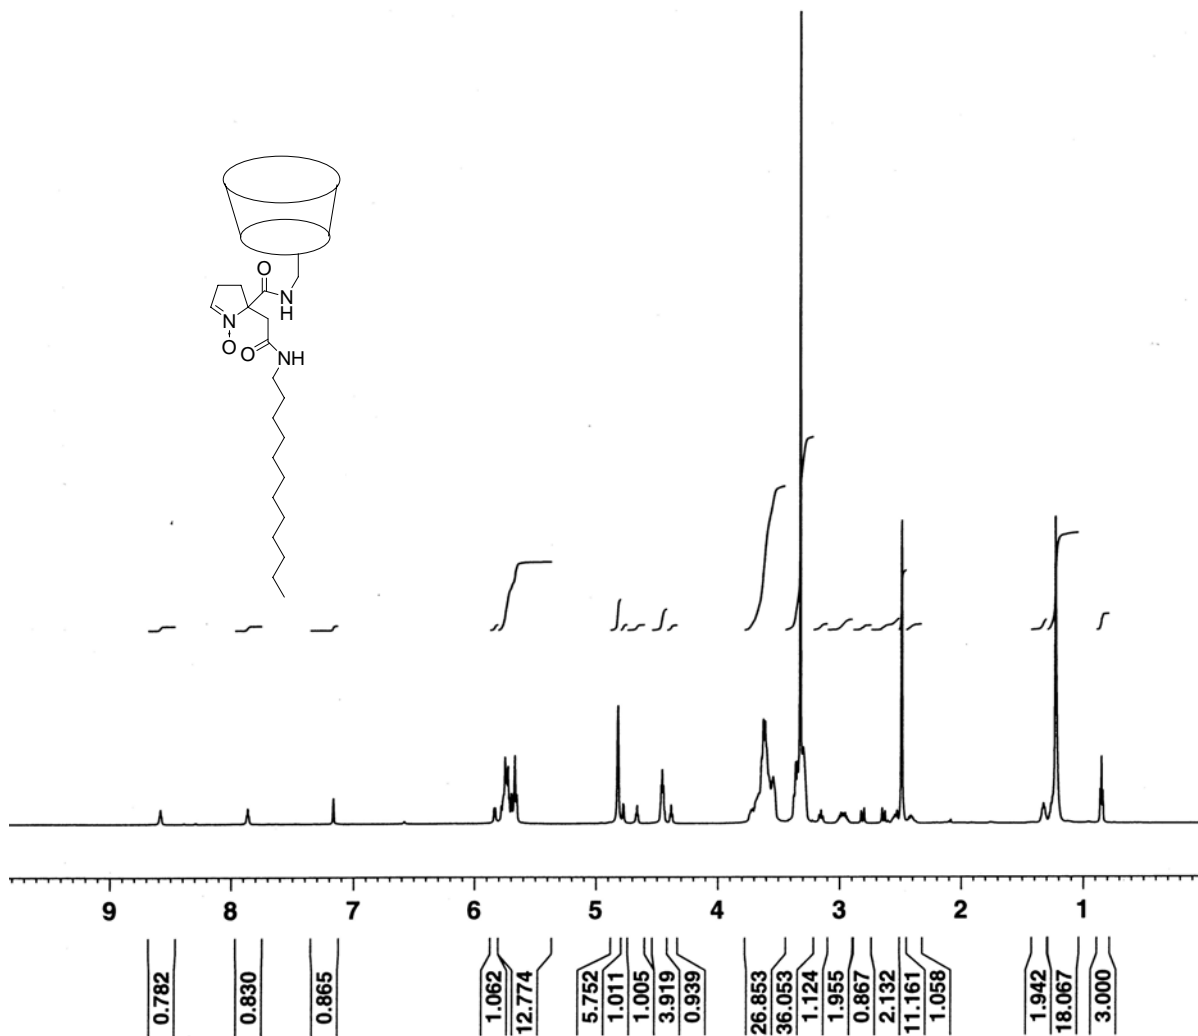

Figure S17. <sup>1</sup>H NMR spectrum of compound **4b** in DMSO-*d*<sub>6</sub>

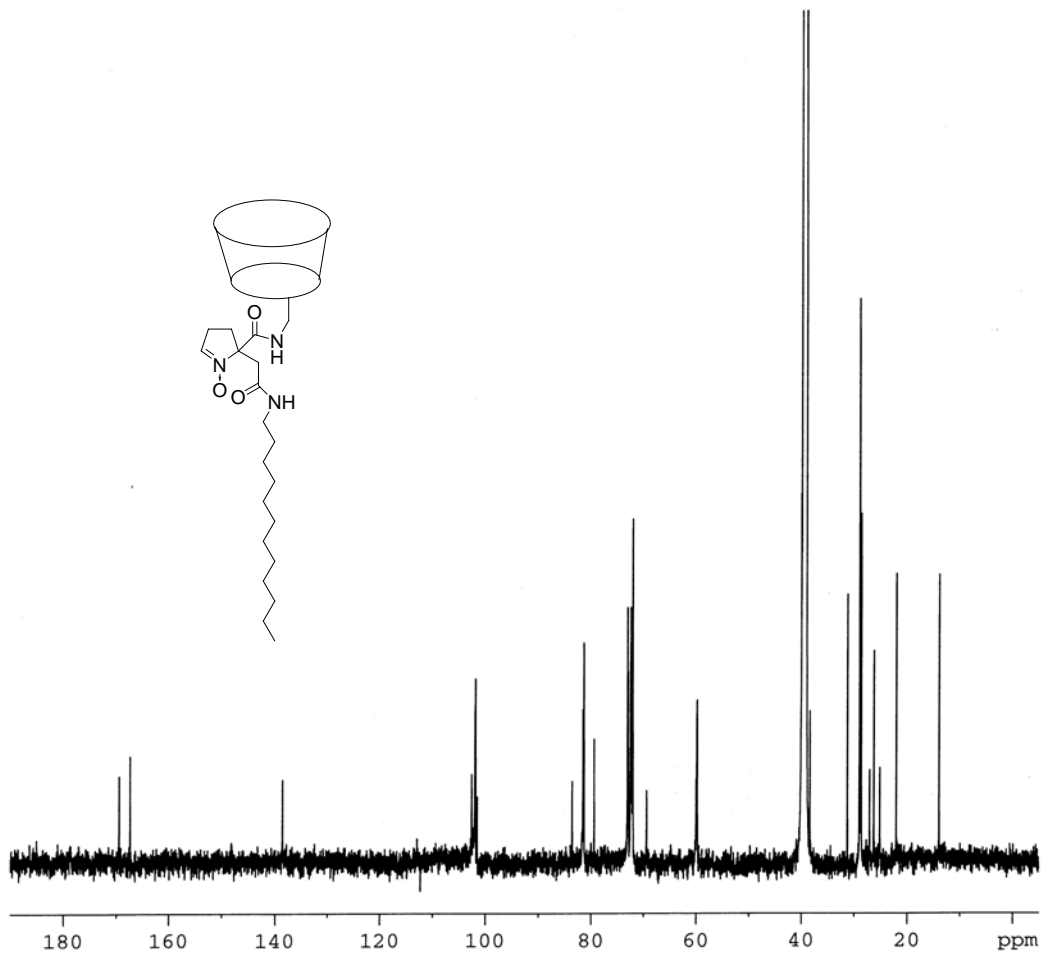

**Figure S18.**  $^{13}\text{C}$  NMR spectrum of compound **4b** in  $\text{DMSO-}d_6$

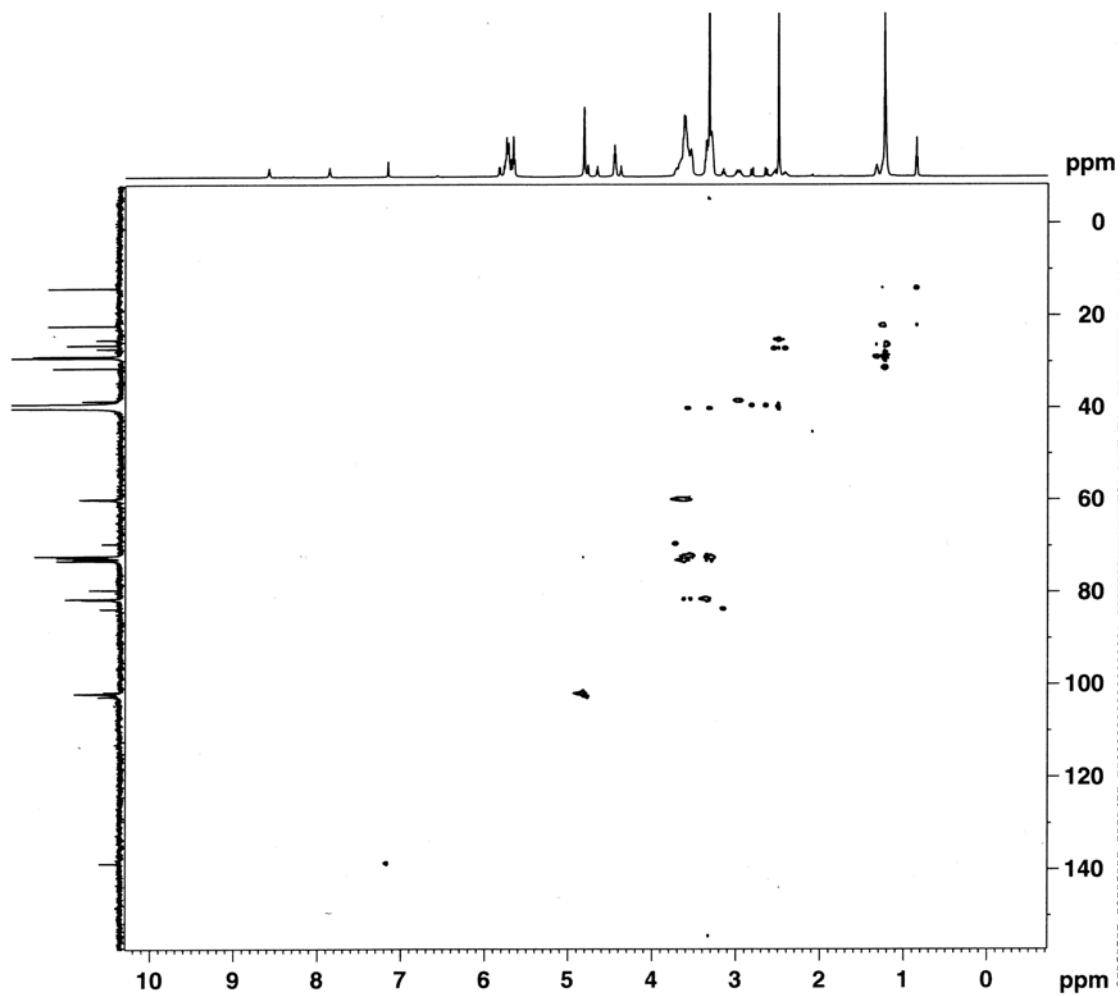

**Figure S19.** HSQC spectrum of compound **4b** in DMSO- $d_6$

4b in dms0-d6 TOCSY 60 msec

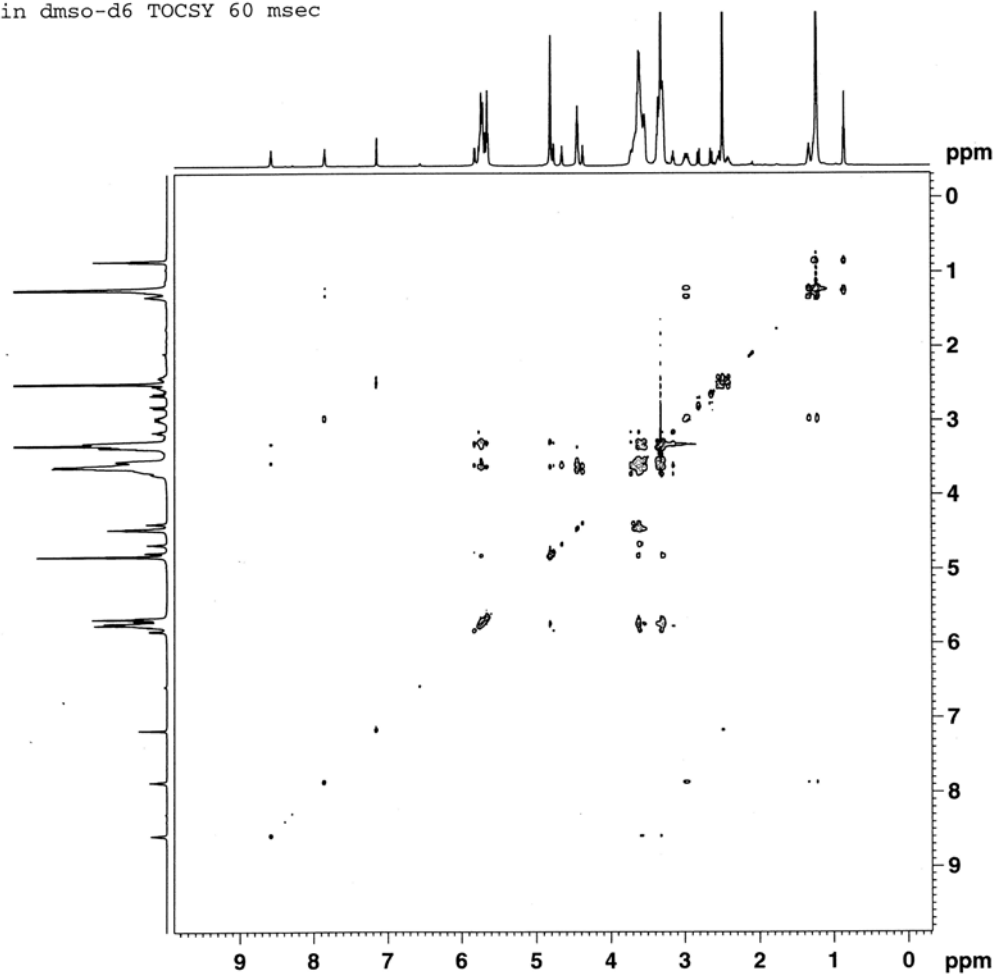

**Figure S20.** TOCSY spectrum of compound **4b** in DMSO- $d_6$

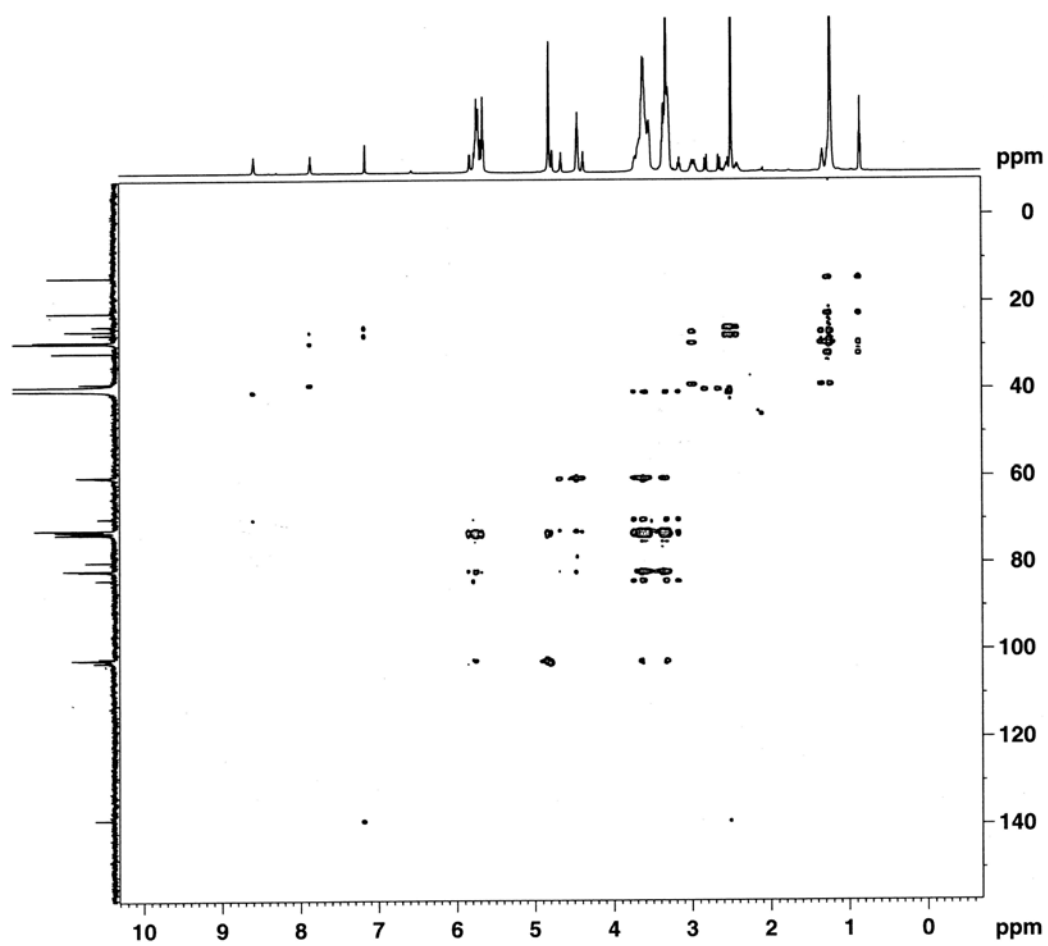

Figure S21. HSQC-COCSY spectrum of compound 4b in DMSO-*d*<sub>6</sub>

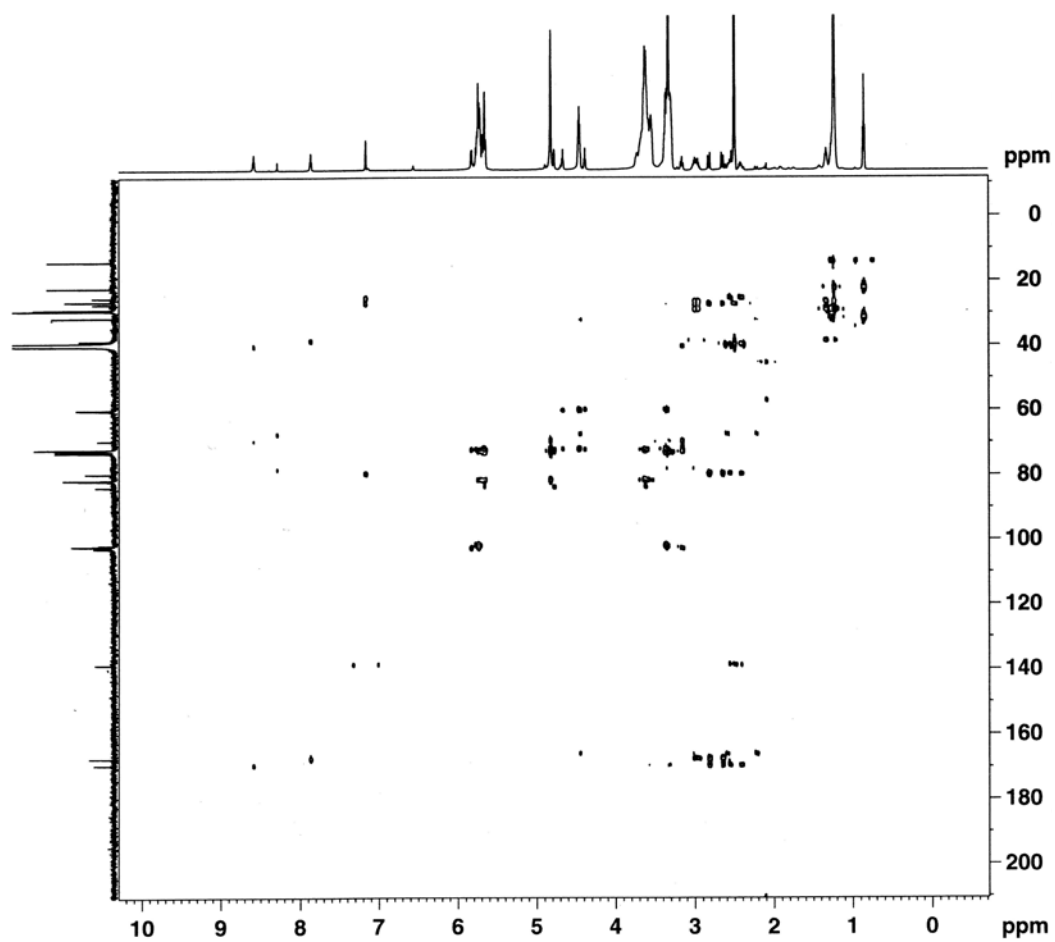

**Figure S22.** HMBC spectrum of compound **4b** in DMSO-*d*<sub>6</sub>



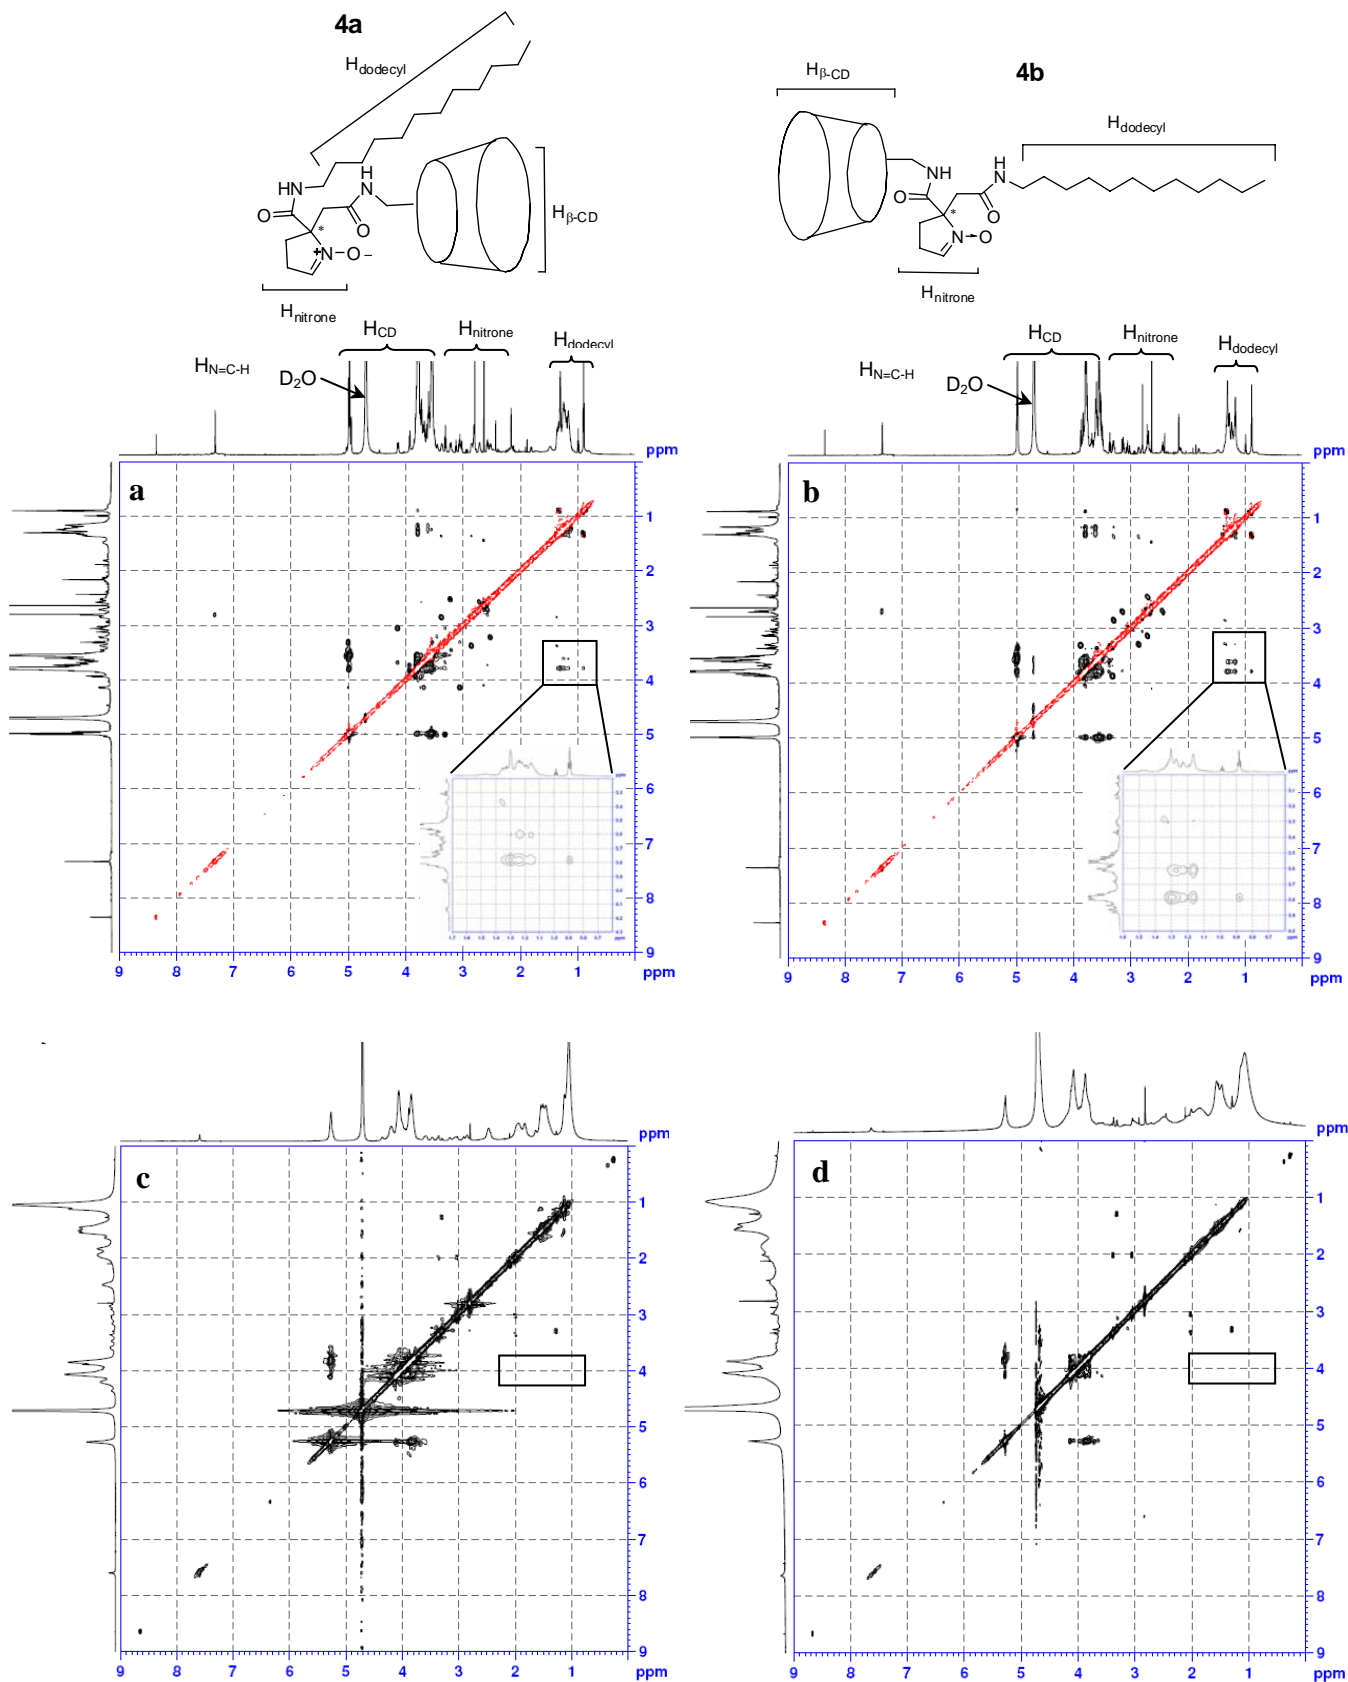

**Figure S23.** ROESY spectra of compounds a) **4a** and b) **4b** alone, and c) **4a** and d) **4b** in the presence of *l*-borneol in  $D_2O$  at  $25^\circ\text{C}$ .

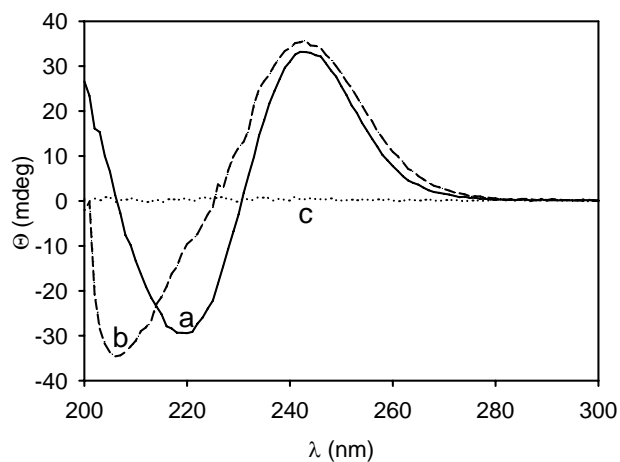

**Figure S24.** Induced Circular Dichroism spectra of 3.4 mM aqueous solutions of **4a** (a), **4b** (b), and **1** (c).

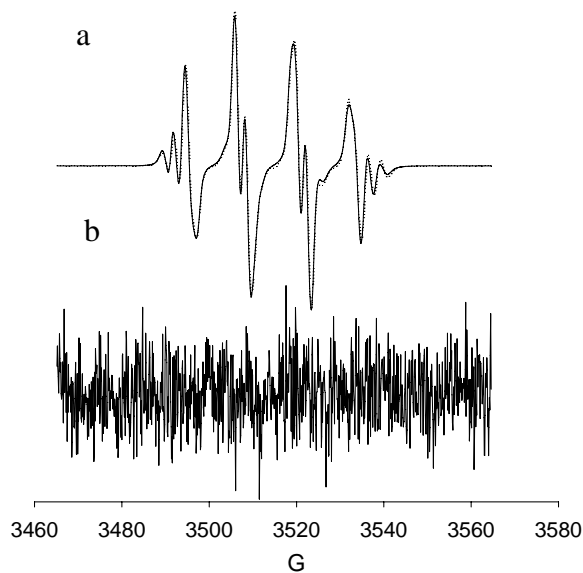

**Figure S25.** X-band EPR spectra of **1** (20 mM) in the presence of (a)  $\text{Fe}^{2+}/\text{H}_2\text{O}_2$  and (b) xanthine/xanthine oxidase. Simulated spectrum is shown as a trace plot. EPR parameters for (a): **1-OH'**:  $g = 2.0051$ ,  $a_{\text{N}} = 13.2$  G,  $a_{\beta\text{H}} = 9.7$  G; **1-OH''**:  $g = 2.0051$ ,  $a_{\text{N}} = 13.5$  G,  $a_{\beta\text{H}} = 11.9$  G; **1-alkyl**:  $g = 2.0049$ ,  $a_{\text{N}} = 14.4$  G,  $a_{\beta\text{H}} = 20.8$  G; unidentified:  $g = 2.0051$ ,  $a_{\text{N}} = 14.2$  G,  $a_{\beta\text{H}} = 16.1$  G.

**Table S1.** Relative bottom-of-the-well energies at the HF/3-21G\* level of theory of the various isomers of **4a** and **4b**, and their respective O<sub>2</sub><sup>•-</sup> adducts.

|                                     | Relative Energies |                                              | Relative Energies |  |
|-------------------------------------|-------------------|----------------------------------------------|-------------------|--|
|                                     | (E, kcal/mol)     |                                              | (E, kcal/mol)     |  |
| <b>4a</b>                           |                   | <b>4b</b>                                    |                   |  |
| 5R- <b>4a</b> ( <i>ex</i> )         | -15.6             | 5R- <b>4b</b> ( <i>ex</i> ) <sup>a</sup>     | -27.1             |  |
| 5R- <b>4a</b> ( <i>in</i> )         | -25.7             | 5R- <b>4b</b> ( <i>in</i> ) <sup>a</sup>     | -0.8              |  |
| 5S- <b>4a</b> ( <i>ex</i> )         | -8.0              | 5S- <b>4b</b> ( <i>ex</i> )                  | 0.0               |  |
| 5S- <b>4a</b> ( <i>in</i> )         | -2.3              | 5S- <b>4b</b> ( <i>in</i> )                  | -20.3             |  |
| <b>4a + borneol</b>                 |                   | <b>4b + borneol</b>                          |                   |  |
| 5R- <b>4a</b> ( <i>top</i> )        | -53.9             | 5R- <b>4b</b> ( <i>top</i> ) <sup>b</sup>    | 0.0               |  |
| 5R- <b>4a</b> ( <i>bottom</i> )     | -33.8             | 5R- <b>4b</b> ( <i>bottom</i> ) <sup>b</sup> | -52.3             |  |
| 5S- <b>4a</b> ( <i>top</i> )        | -48.6             | 5S- <b>4b</b> ( <i>top</i> )                 | -34.4             |  |
| 5S- <b>4a</b> ( <i>bottom</i> )     | -51.1             | 5S- <b>4b</b> ( <i>bottom</i> )              | -55.0             |  |
| <b>4a-OOH</b>                       |                   | <b>4b-OOH</b>                                |                   |  |
| 2S,5R- <b>4a</b> -OOH ( <i>ex</i> ) | -22.6             | 2S,5R- <b>4b</b> -OOH ( <i>ex</i> )          | -26.9             |  |
| 2R,5R- <b>4a</b> -OOH ( <i>ex</i> ) | -24.6             | 2R,5R- <b>4b</b> -OOH ( <i>ex</i> )          | -36.5             |  |
| 2S,5R- <b>4a</b> -OOH ( <i>in</i> ) | -17.7             | 2S,5R- <b>4b</b> -OOH ( <i>in</i> )          | -12.5             |  |
| 2R,5R- <b>4a</b> -OOH ( <i>in</i> ) | -32.6             | 2R,5R- <b>4b</b> -OOH ( <i>in</i> )          | -15.2             |  |
| 2S,5S- <b>4a</b> -OOH ( <i>ex</i> ) | -37.2             | 2S,5S- <b>4b</b> -OOH ( <i>ex</i> )          | 0.0               |  |
| 2R,5S- <b>4a</b> -OOH ( <i>ex</i> ) | -37.3             | 2R,5S- <b>4b</b> -OOH ( <i>ex</i> )          | -20.4             |  |
| 2S,5S- <b>4a</b> -OOH ( <i>in</i> ) | -18.6             | 2S,5S- <b>4b</b> -OOH ( <i>in</i> )          | -20.5             |  |
| 2R,5S- <b>4a</b> -OOH ( <i>in</i> ) | -13.8             | 2R,5S- <b>4b</b> -OOH ( <i>in</i> )          | -22.6             |  |

<sup>a</sup>“*ex*” refers to the position of the dodecyl group being outside the β-CD cavity while “*in*” refers to dodecyl group being included (see Figure 11 for example). <sup>b</sup>“*top*” refers to the location of borneol being on the same side of the β-CD annulus as the nitron group while “*bottom*” is where the borneol being in the opposite side (see Figure 12 for example).

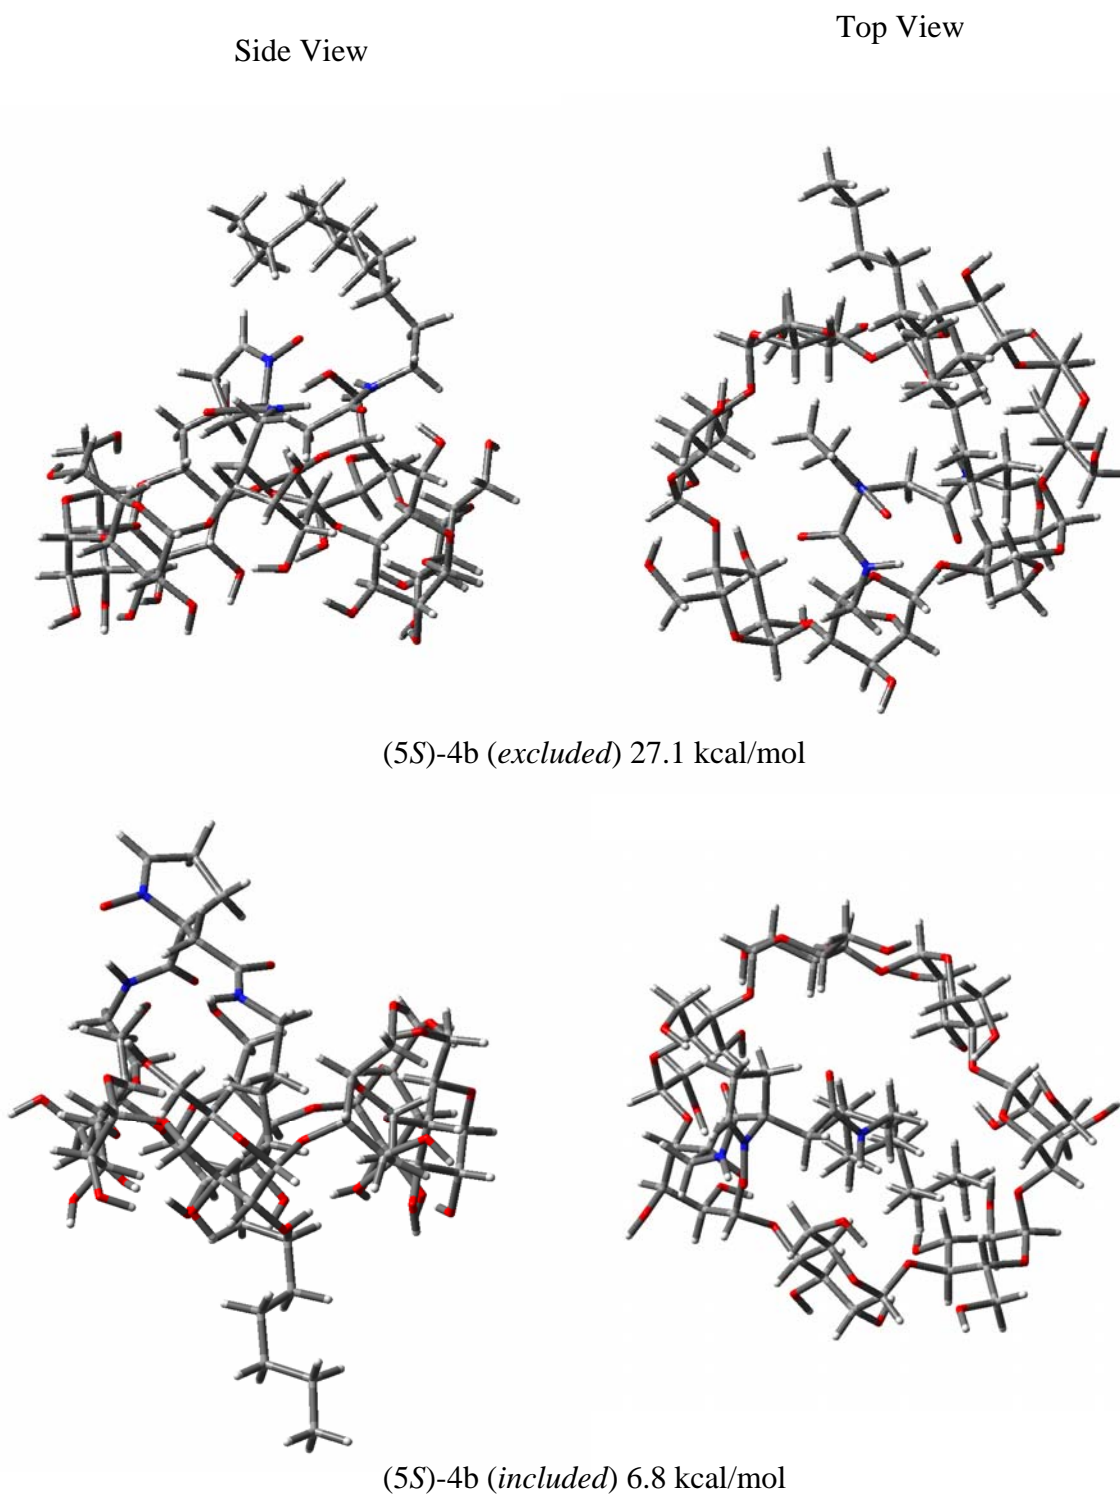

**Figure S26.** Side and top views of the optimized geometries of (5S)-**4b** at the HF/3-21G\* level of theory showing the dodecyl group outside (top) and inside (bottom) of the  $\beta$ -CD cavity and their relative bottom-of-the-well energies.

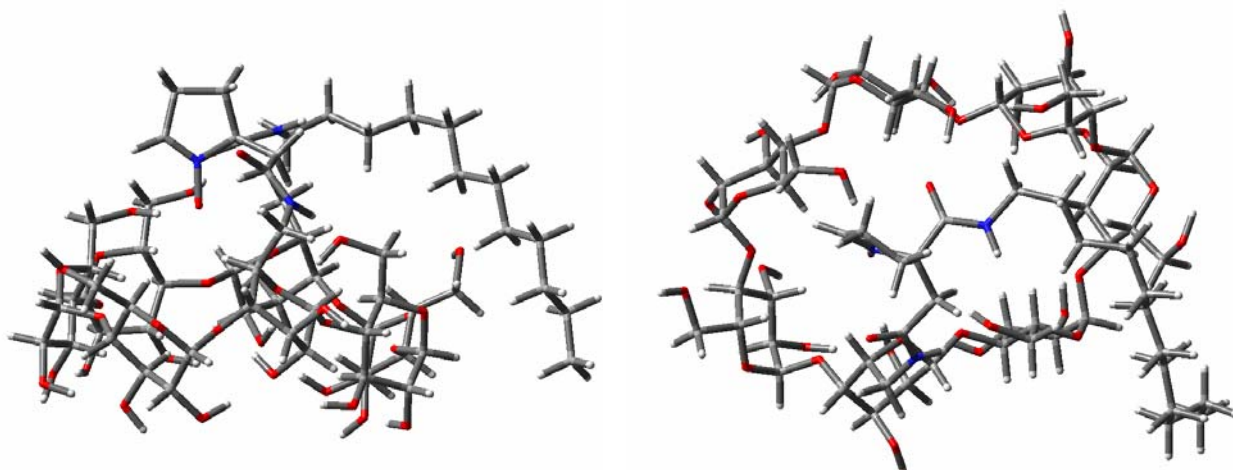

(5S)-4a (*excluded*) 19.1 kcal/mol

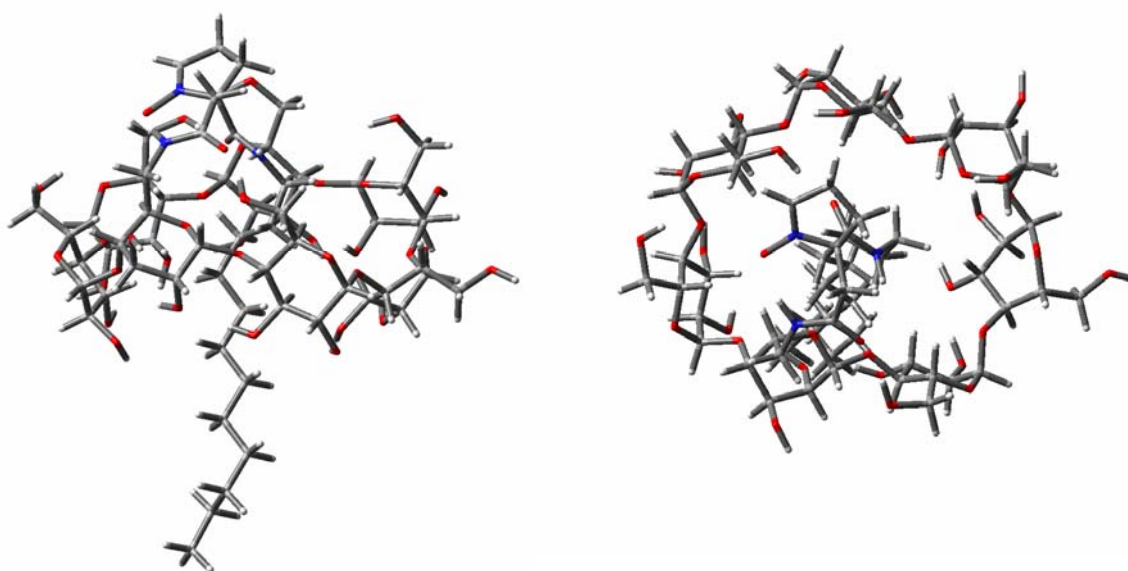

(5S)-4a (*included*) 24.8 kcal/mol

**Figure S27.** Side and top views of the optimized geometries of (5S)-4a at the HF/3-21G\* level of theory showing the dodecyl group outside (top) and inside (bottom) of the  $\beta$ -CD cavity and their relative bottom-of-the-well energies.

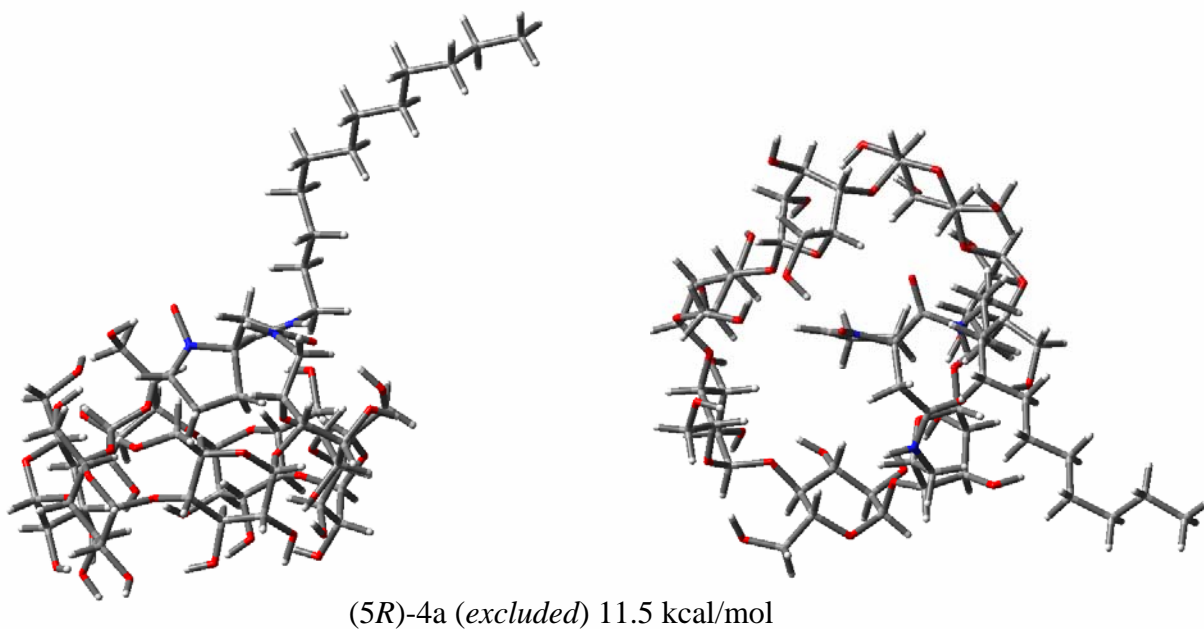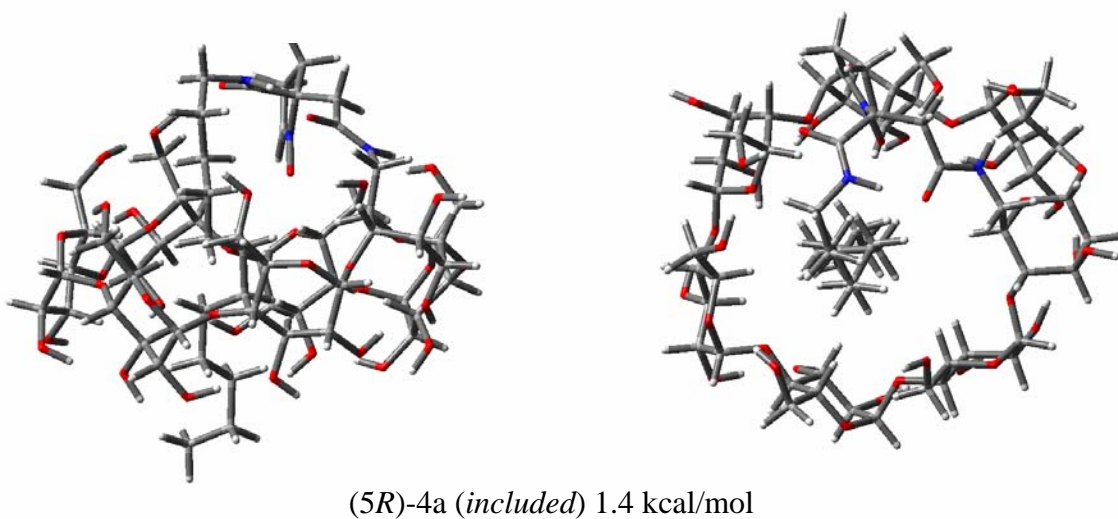

**Figure S28.** Side and top views of the optimized geometries of (5R)-4a at the HF/3-21G\* level of theory showing the dodecyl group outside (top) and inside (bottom) of the  $\beta$ -CD cavity and their relative bottom-of-the-well energies.



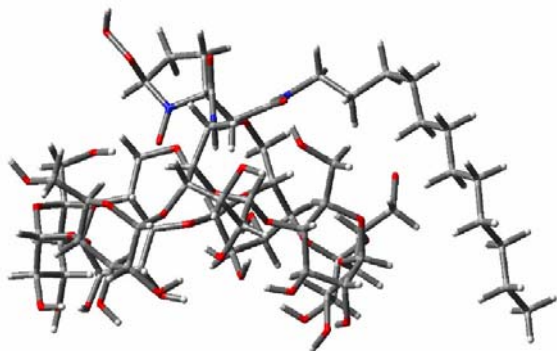

(2*S*,5*R*)-4b-OOH (*excluded*) -26.9 kcal/mol

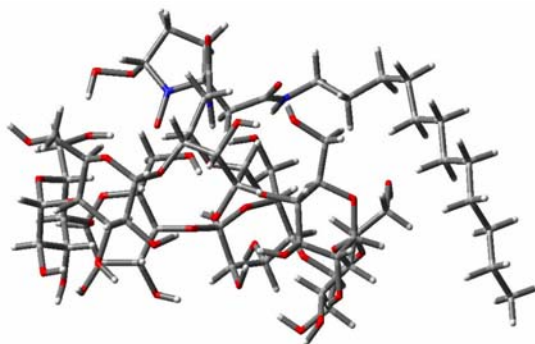

(2*R*,5*R*)-4b-OOH (*excluded*) -36.5 kcal/mol

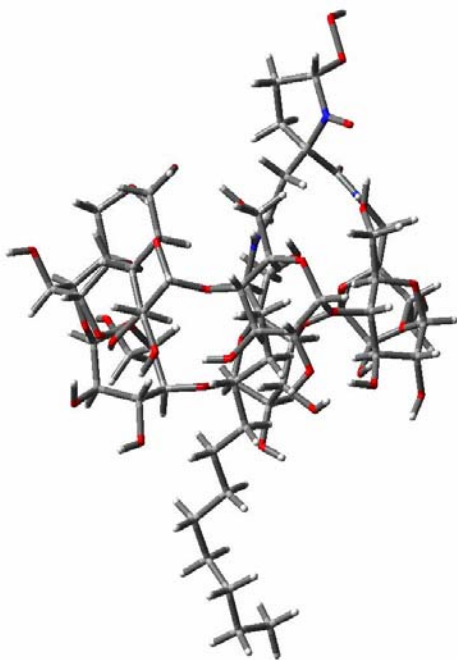

(2*S*,5*R*)-4b-OOH (*included*) -12.5 kcal/mol

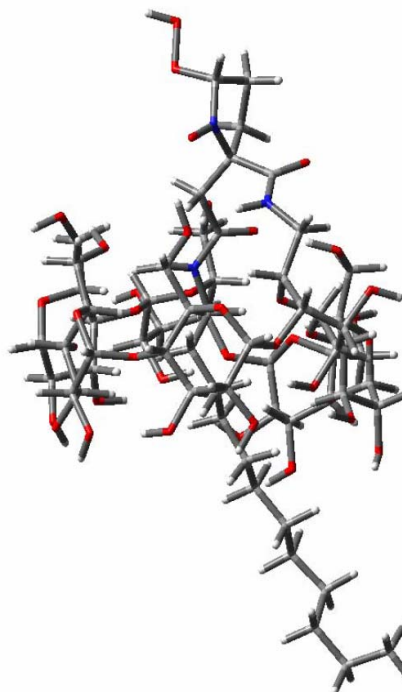

(2*R*,5*R*)-4b-OOH (*included*) -15.2 kcal/mol

**Figure S29.** Optimized geometries of the various isomers of (5*R*)-**4b-OOH** at the HF/3-21G\* level of theory showing the dodecyl group outside (top) and inside (bottom) of the  $\beta$ -CD cavity and their relative bottom-of-the-well energies.

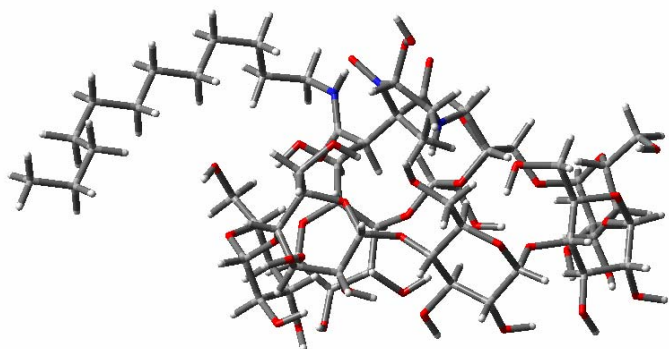

(2*S*,5*S*)-4b-OOH (*excluded*) 0.0 kcal/mol

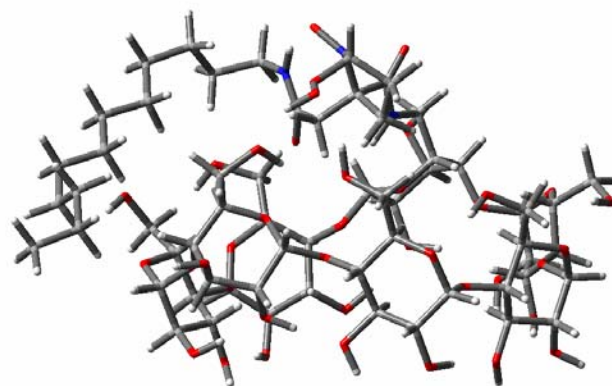

(2*R*,5*S*)-4b-OOH (*excluded*) -20.4 kcal/mol

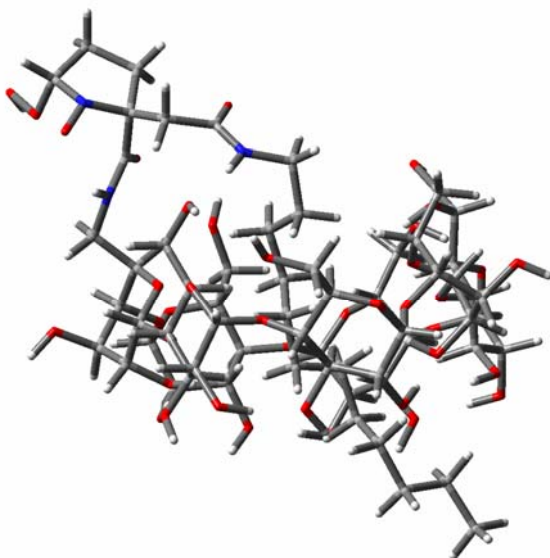

(2*S*,5*S*)-4b-OOH (*included*) -20.5 kcal/mol

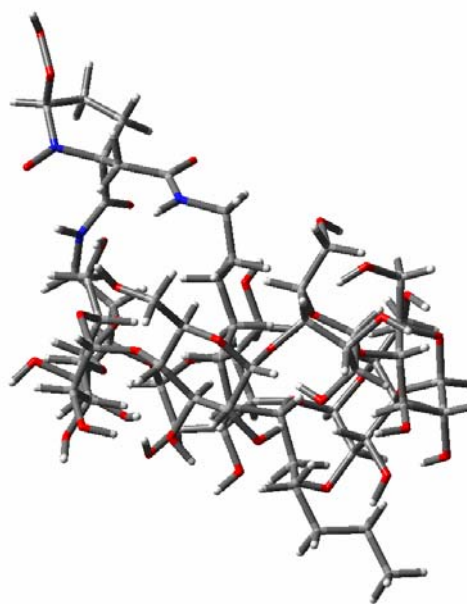

(2*R*,5*S*)-4b-OOH (*included*) -22.6 kcal/mol

**Figure S30.** Optimized geometries of the various isomers of (5*S*)-**4b-OOH** at the HF/3-21G\* level of theory showing the dodecyl group outside (top) and inside (bottom) of the  $\beta$ -CD cavity and their relative bottom-of-the-well energies.



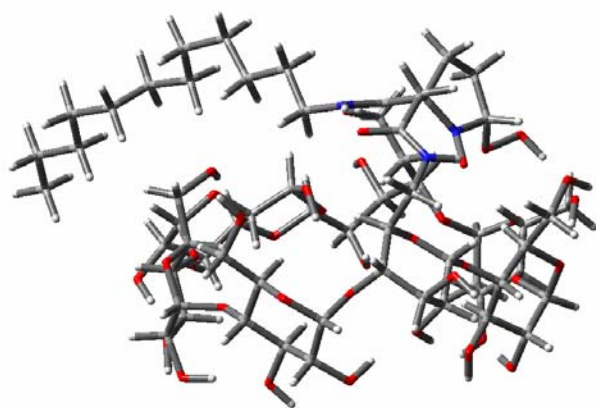

(2*S*,5*R*)-4a-OOH (*excluded*) -4.9 kcal/mol

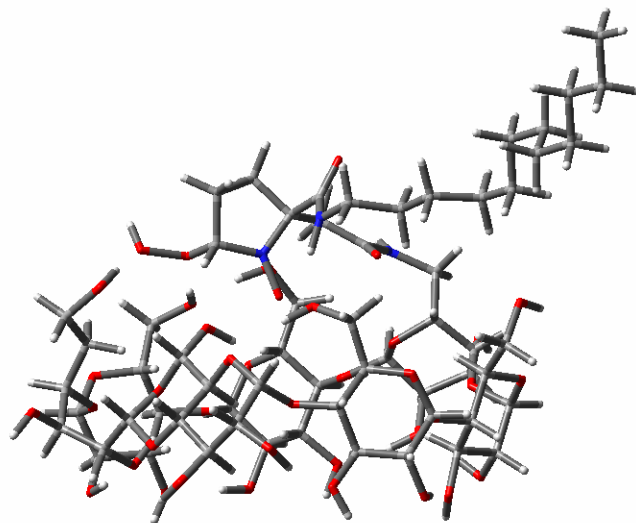

(2*R*,5*R*)-4a-OOH (*excluded*) -6.8 kcal/mol

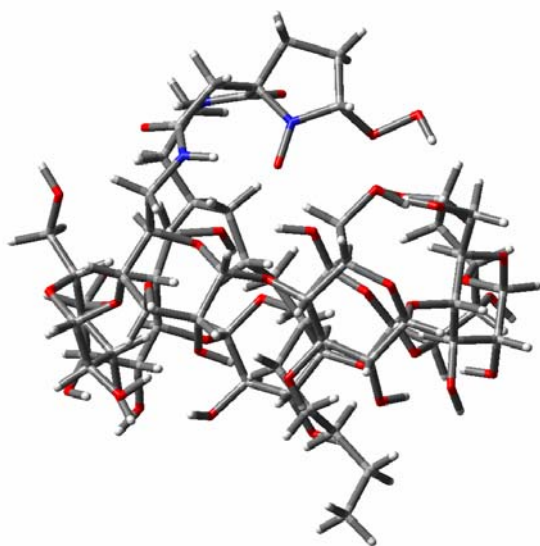

(2*S*,5*R*)-4a-OOH (*included*) 0.0 kcal/mol

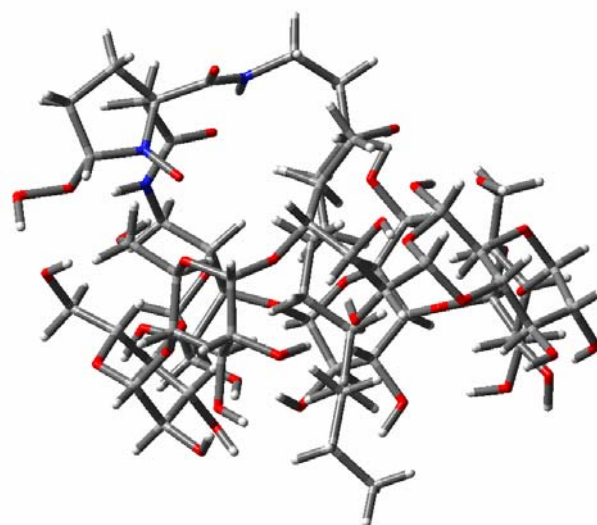

(2*R*,5*R*)-4a-OOH (*included*) -14.9 kcal/mol

**Figure S31.** Optimized geometries of the various isomers of (5*R*)-4a-OOH at the HF/3-21G\* level of theory showing the dodecyl group outside (top) and inside (bottom) of the  $\beta$ -CD cavity and their relative bottom-of-the-well energies.

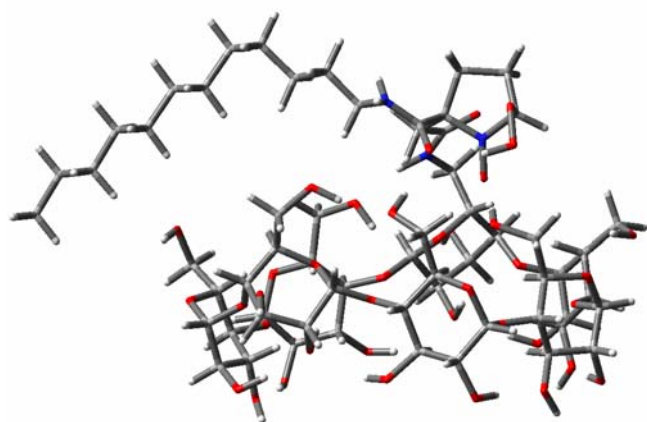

(2*S*,5*S*)-4a-OOH (*excluded*) -23.4 kcal/mol

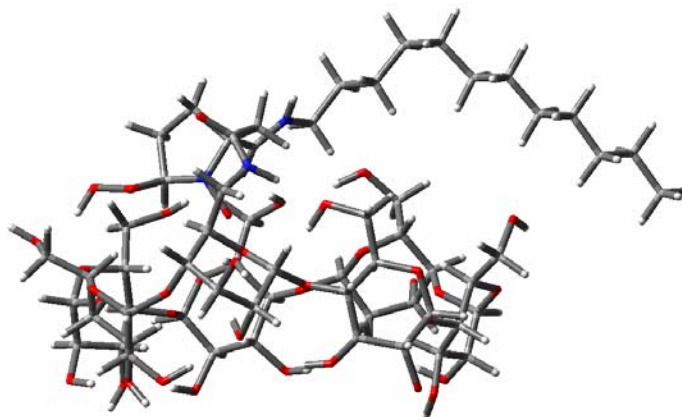

(2*R*,5*S*)-4a-OOH (*excluded*) -23.6 kcal/mol

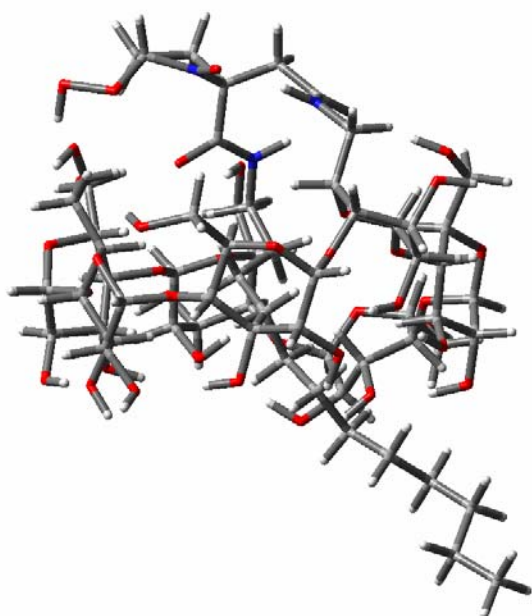

(2*S*,5*S*)-4a-OOH (*included*) -4.8 kcal/mol

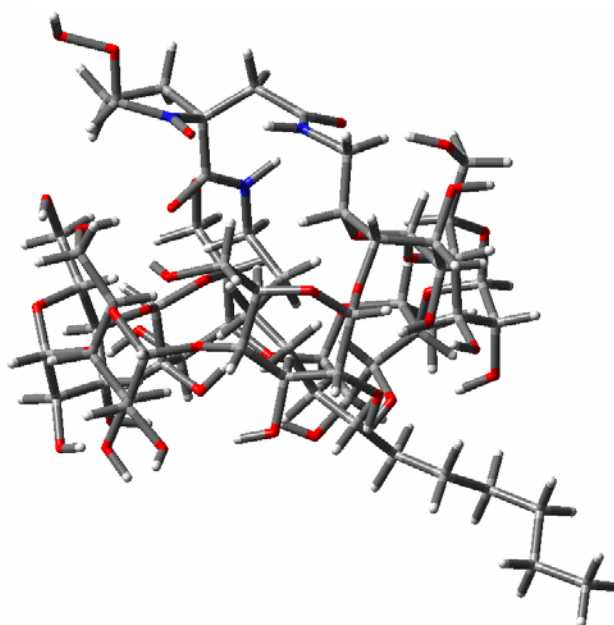

(2*R*,5*S*)-4a-OOH (*included*) -0.0 kcal/mol

**Figure S32.** Optimized geometries of the various isomers of (5*S*)-4a-OOH at the HF/3-21G\* level of theory showing the dodecyl group outside (top) and inside (bottom) of the  $\beta$ -CD cavity and their relative bottom-of-the-well energies.

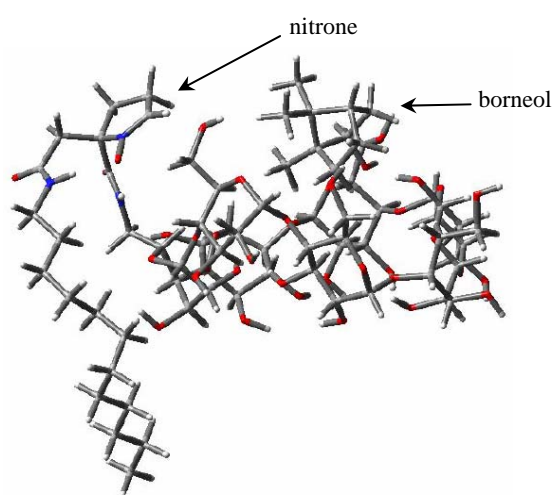

(5*R*)-4b + borneol (*top*) 0.0 kcal/mol

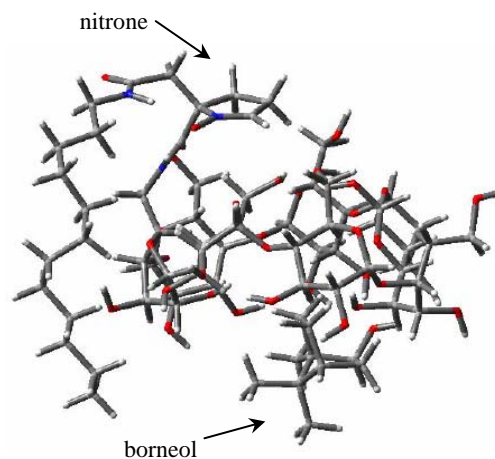

(5*R*)-4b + borneol (*bottom*) -52.3 kcal/mol

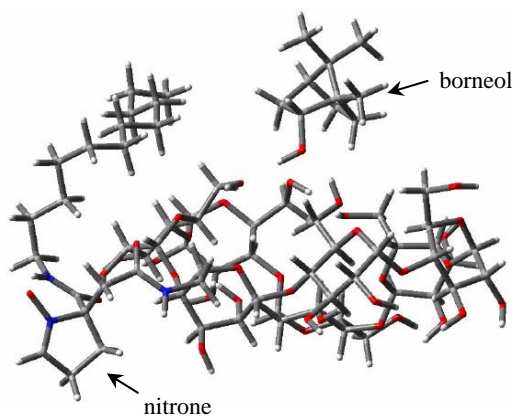

(5*R*)-4a + borneol (*top*) -53.9 kcal/mol

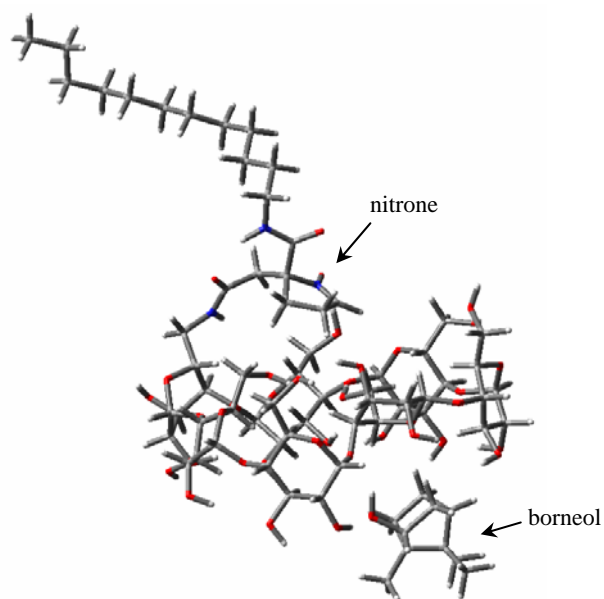

(5*R*)-4a + borneol (*bottom*) -33.8 kcal/mol

**Figure S33.** Optimized geometries of the R isomers of **4b/4a**--borneol complex at the HF/3-21G\* level of theory showing the location of borneol relative to the nitrone group being on the same (left) and opposite side (right) of the annulus and their relative bottom-of-the-well energies.

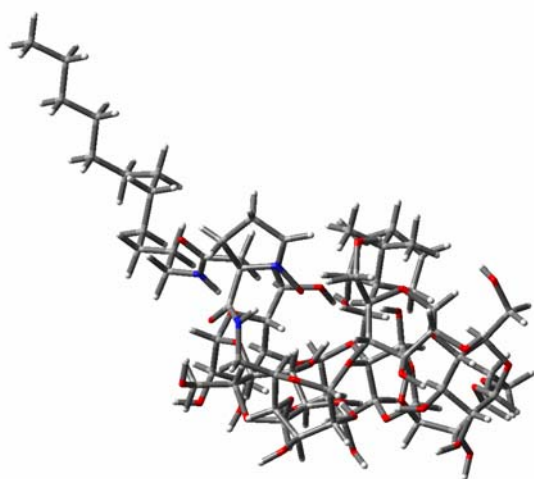

(5S)-4b + borneol (*top*) -34.4 kcal/mol

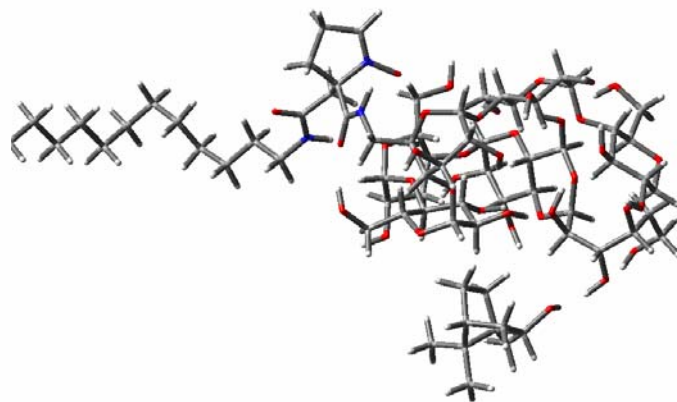

(5S)-4b + borneol (*bottom*) -55.0 kcal/mol

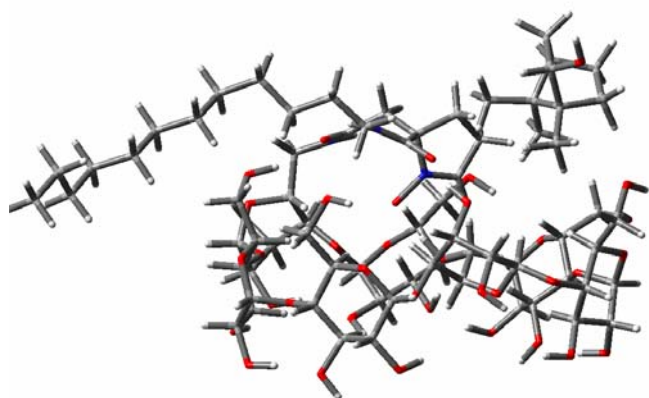

(5S)-4a + borneol (*top*) -48.6 kcal/mol

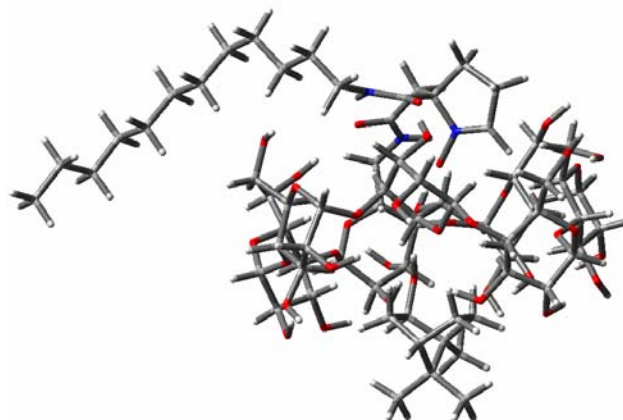

(5S)-4a + borneol (*bottom*) -51.1 kcal/mol

**Figure S34.** Optimized geometries of the S isomers of **4b/4a**---borneol complex at the HF/3-21G\* level of theory showing the location of borneol relative to the nitrone group being on the same (left) and opposite side (right) of the annulus and their relative bottom-of-the-well energies.

(5R)-4b (excluded)

| Center Number | Atomic Number | Atomic Type | Coordinates (Angstroms) |           |           |
|---------------|---------------|-------------|-------------------------|-----------|-----------|
|               |               |             | X                       | Y         | Z         |
| 1             | 6             | 0           | 0.309185                | -3.504030 | -0.237913 |
| 2             | 6             | 0           | -0.180399               | -4.613930 | -1.147987 |
| 3             | 6             | 0           | -0.994214               | -5.577931 | -0.277487 |
| 4             | 6             | 0           | -2.124192               | -4.862283 | 0.457844  |
| 5             | 6             | 0           | -1.684563               | -3.578494 | 1.160302  |
| 6             | 6             | 0           | -1.027339               | -3.741874 | 2.535989  |
| 7             | 6             | 0           | 4.730008                | -1.336928 | -2.102352 |
| 8             | 6             | 0           | 4.000273                | -2.240165 | -3.100237 |
| 9             | 6             | 0           | 2.525695                | -2.328405 | -2.721947 |
| 10            | 6             | 0           | 2.375081                | -2.611262 | -1.239994 |
| 11            | 6             | 0           | 3.114402                | -1.618682 | -0.372592 |
| 12            | 6             | 0           | 2.980070                | -1.887155 | 1.119224  |
| 13            | 6             | 0           | 4.542417                | 3.968057  | -1.661450 |
| 14            | 6             | 0           | 4.380560                | 3.532495  | -3.107111 |
| 15            | 6             | 0           | 3.968649                | 2.071148  | -3.151545 |
| 16            | 6             | 0           | 4.874915                | 1.179405  | -2.324847 |
| 17            | 6             | 0           | 5.014439                | 1.723727  | -0.909902 |
| 18            | 6             | 0           | 6.056565                | 1.048626  | -0.041687 |
| 19            | 6             | 0           | -0.040747               | 4.405732  | -0.109200 |
| 20            | 6             | 0           | 0.636835                | 5.161557  | -1.246591 |
| 21            | 6             | 0           | 1.933664                | 5.784501  | -0.733047 |
| 22            | 6             | 0           | 2.819572                | 4.749933  | -0.039991 |
| 23            | 6             | 0           | 2.065789                | 3.874752  | 0.958737  |
| 24            | 6             | 0           | 1.769959                | 4.542953  | 2.302156  |
| 25            | 6             | 0           | -5.205548               | 4.061089  | -0.839283 |
| 26            | 6             | 0           | -4.445378               | 4.669432  | -2.018037 |
| 27            | 6             | 0           | -3.012016               | 4.159065  | -1.957626 |
| 28            | 6             | 0           | -2.425067               | 4.391846  | -0.573440 |
| 29            | 6             | 0           | -3.284216               | 3.843426  | 0.543660  |
| 30            | 6             | 0           | -2.830328               | 4.184093  | 1.954687  |
| 31            | 6             | 0           | -7.336882               | -0.907167 | -1.087799 |
| 32            | 6             | 0           | -7.378794               | -0.005345 | -2.302321 |
| 33            | 6             | 0           | -6.238552               | 0.988581  | -2.237976 |
| 34            | 6             | 0           | -6.268639               | 1.782599  | -0.944413 |
| 35            | 6             | 0           | -6.168211               | 0.797841  | 0.224467  |
| 36            | 6             | 0           | -6.319778               | 1.360307  | 1.640962  |
| 37            | 6             | 0           | -4.189395               | -5.235293 | -0.854850 |
| 38            | 6             | 0           | -4.610321               | -4.827855 | -2.253490 |
| 39            | 6             | 0           | -5.009948               | -3.366554 | -2.227373 |
| 40            | 6             | 0           | -6.090121               | -3.085420 | -1.203480 |
| 41            | 6             | 0           | -5.695903               | -3.617904 | 0.173285  |
| 42            | 6             | 0           | -6.876668               | -3.725996 | 1.149006  |
| 43            | 8             | 0           | -0.958915               | -4.022946 | -2.207454 |
| 44            | 8             | 0           | -0.118790               | -6.075598 | 0.756975  |
| 45            | 8             | 0           | -3.049594               | -4.437296 | -0.569008 |
| 46            | 8             | 0           | -0.832669               | -2.822286 | 0.264854  |
| 47            | 8             | 0           | 4.210238                | -1.698952 | -4.402472 |
| 48            | 8             | 0           | 1.914996                | -3.414900 | -3.433551 |
| 49            | 8             | 0           | 0.963647                | -2.482719 | -0.958842 |
| 50            | 8             | 0           | 4.510952                | -1.728937 | -0.744293 |
| 51            | 8             | 0           | 3.408263                | 4.336184  | -3.779376 |

|     |   |   |           |           |           |
|-----|---|---|-----------|-----------|-----------|
| 52  | 8 | 0 | 4.014989  | 1.558453  | -4.493464 |
| 53  | 8 | 0 | 4.153641  | -0.062692 | -2.319197 |
| 54  | 8 | 0 | 5.453966  | 3.109933  | -0.993886 |
| 55  | 8 | 0 | 6.053112  | 1.675752  | 1.255882  |
| 56  | 8 | 0 | 0.891348  | 4.233010  | -2.325085 |
| 57  | 8 | 0 | 1.601983  | 6.757358  | 0.278914  |
| 58  | 8 | 0 | 3.251554  | 3.858156  | -1.091064 |
| 59  | 8 | 0 | 0.858828  | 3.391944  | 0.327496  |
| 60  | 8 | 0 | 0.956092  | 3.670953  | 3.101055  |
| 61  | 8 | 0 | -5.104423 | 4.386817  | -3.241527 |
| 62  | 8 | 0 | -2.191519 | 4.882793  | -2.891354 |
| 63  | 8 | 0 | -1.151293 | 3.711332  | -0.600962 |
| 64  | 8 | 0 | -4.590587 | 4.442045  | 0.379466  |
| 65  | 8 | 0 | -1.613681 | 3.457999  | 2.259135  |
| 66  | 8 | 0 | -7.307513 | -0.731490 | -3.531087 |
| 67  | 8 | 0 | -6.363617 | 1.912707  | -3.333590 |
| 68  | 8 | 0 | -5.127871 | 2.643149  | -0.996141 |
| 69  | 8 | 0 | -7.304704 | -0.113599 | 0.097867  |
| 70  | 8 | 0 | -5.139298 | 1.966303  | 2.173015  |
| 71  | 8 | 0 | -3.565040 | -5.033543 | -3.207871 |
| 72  | 8 | 0 | -5.540351 | -2.968150 | -3.507640 |
| 73  | 8 | 0 | -6.129081 | -1.647101 | -1.156473 |
| 74  | 8 | 0 | -5.228633 | -4.990856 | 0.066252  |
| 75  | 8 | 0 | -7.863123 | -2.704523 | 0.968328  |
| 76  | 7 | 0 | -0.725413 | -2.415584 | 3.073659  |
| 77  | 8 | 0 | 1.639718  | -1.572041 | 1.570067  |
| 78  | 6 | 0 | -3.486781 | 0.731925  | 4.391673  |
| 79  | 7 | 0 | -2.596287 | 0.581015  | 3.511462  |
| 80  | 8 | 0 | -2.649563 | 0.985313  | 2.165451  |
| 81  | 6 | 0 | -1.575939 | -0.155405 | 5.491308  |
| 82  | 6 | 0 | -1.414835 | -0.216387 | 3.949070  |
| 83  | 6 | 0 | -3.100925 | 0.076473  | 5.690174  |
| 84  | 6 | 0 | -0.173746 | 0.469003  | 3.380741  |
| 85  | 6 | 0 | 3.219708  | 1.032729  | 4.960464  |
| 86  | 6 | 0 | 4.235764  | 0.164215  | 4.199141  |
| 87  | 6 | 0 | 5.570495  | 0.038655  | 4.963938  |
| 88  | 6 | 0 | 6.423342  | -1.163103 | 4.499731  |
| 89  | 6 | 0 | 6.695428  | -1.169215 | 2.983997  |
| 90  | 6 | 0 | 7.607597  | -2.331170 | 2.546665  |
| 91  | 6 | 0 | 7.761853  | -2.394406 | 1.013312  |
| 92  | 6 | 0 | 8.627654  | -3.584163 | 0.555389  |
| 93  | 6 | 0 | 8.707882  | -3.731806 | -0.979136 |
| 94  | 6 | 0 | 9.470758  | -2.586026 | -1.672573 |
| 95  | 6 | 0 | 9.589491  | -2.798017 | -3.194412 |
| 96  | 6 | 0 | -1.732947 | -1.641238 | 3.470355  |
| 97  | 8 | 0 | -2.899809 | -2.029339 | 3.496497  |
| 98  | 6 | 0 | 10.358170 | -1.652333 | -3.880700 |
| 99  | 6 | 0 | 1.077541  | 0.163016  | 4.176340  |
| 100 | 7 | 0 | 1.948230  | 1.172772  | 4.241684  |
| 101 | 8 | 0 | 1.242191  | -0.934714 | 4.710955  |
| 102 | 1 | 0 | 0.924859  | -3.900650 | 0.547753  |
| 103 | 1 | 0 | 0.647294  | -5.123922 | -1.614655 |
| 104 | 1 | 0 | -1.405927 | -6.375551 | -0.881571 |
| 105 | 1 | 0 | -2.604448 | -5.532863 | 1.156066  |
| 106 | 1 | 0 | -2.559181 | -2.968668 | 1.290889  |
| 107 | 1 | 0 | -0.123629 | -4.322718 | 2.487378  |

|     |   |   |           |           |           |     |   |   |           |           |           |
|-----|---|---|-----------|-----------|-----------|-----|---|---|-----------|-----------|-----------|
| 108 | 1 | 0 | -1.729345 | -4.241513 | 3.188697  | 164 | 1 | 0 | -6.640401 | -1.447782 | -3.503094 |
| 109 | 1 | 0 | 5.794408  | -1.338538 | -2.267283 | 165 | 1 | 0 | -6.586569 | 1.419143  | -4.137332 |
| 110 | 1 | 0 | 4.422502  | -3.231818 | -3.088292 | 166 | 1 | 0 | -4.302240 | 1.488043  | 1.982035  |
| 111 | 1 | 0 | 2.050010  | -1.382874 | -2.939317 | 167 | 1 | 0 | -2.701759 | -4.733897 | -2.866478 |
| 112 | 1 | 0 | 2.727021  | -3.615066 | -1.038621 | 168 | 1 | 0 | -4.966292 | -3.296438 | -4.215552 |
| 113 | 1 | 0 | 2.755933  | -0.625777 | -0.583542 | 169 | 1 | 0 | -7.545084 | -1.812164 | 1.171085  |
| 114 | 1 | 0 | 3.667438  | -1.260667 | 1.657121  | 170 | 1 | 0 | 0.226327  | -2.098685 | 3.101904  |
| 115 | 1 | 0 | 3.215433  | -2.921484 | 1.334113  | 171 | 1 | 0 | 1.009996  | -1.536968 | 0.836397  |
| 116 | 1 | 0 | 4.932008  | 4.970527  | -1.581996 | 172 | 1 | 0 | -4.388569 | 1.252898  | 4.151868  |
| 117 | 1 | 0 | 5.317242  | 3.656657  | -3.627252 | 173 | 1 | 0 | -3.328377 | 0.691917  | 6.547780  |
| 118 | 1 | 0 | 2.974309  | 1.980236  | -2.739949 | 174 | 1 | 0 | -3.629952 | -0.865089 | 5.762434  |
| 119 | 1 | 0 | 5.834493  | 1.071828  | -2.814030 | 175 | 1 | 0 | -1.200374 | -1.046094 | 5.965323  |
| 120 | 1 | 0 | 4.055515  | 1.683029  | -0.423013 | 176 | 1 | 0 | -1.027666 | 0.698436  | 5.867170  |
| 121 | 1 | 0 | 7.027641  | 1.132179  | -0.515983 | 177 | 1 | 0 | 3.613698  | 2.028778  | 5.117449  |
| 122 | 1 | 0 | 5.805977  | 0.016145  | 0.109866  | 178 | 1 | 0 | 3.026475  | 0.582979  | 5.926285  |
| 123 | 1 | 0 | -0.299433 | 5.078069  | 0.687321  | 179 | 1 | 0 | 4.418991  | 0.596636  | 3.222495  |
| 124 | 1 | 0 | -0.025235 | 5.917431  | -1.638327 | 180 | 1 | 0 | 3.787061  | -0.813341 | 4.074247  |
| 125 | 1 | 0 | 2.485568  | 6.223636  | -1.553999 | 181 | 1 | 0 | 6.141132  | 0.954225  | 4.839492  |
| 126 | 1 | 0 | 3.662321  | 5.238209  | 0.430727  | 182 | 1 | 0 | 5.368646  | -0.075760 | 6.026057  |
| 127 | 1 | 0 | 2.648987  | 2.986644  | 1.138465  | 183 | 1 | 0 | 7.368982  | -1.153703 | 5.034942  |
| 128 | 1 | 0 | 1.311516  | 5.508325  | 2.171455  | 184 | 1 | 0 | 5.909973  | -2.082064 | 4.770244  |
| 129 | 1 | 0 | 2.702779  | 4.684154  | 2.829526  | 185 | 1 | 0 | 5.752580  | -1.265805 | 2.460646  |
| 130 | 1 | 0 | -6.229855 | 4.395177  | -0.811533 | 186 | 1 | 0 | 7.118214  | -0.218976 | 2.679029  |
| 131 | 1 | 0 | -4.432485 | 5.742026  | -1.897919 | 187 | 1 | 0 | 8.586432  | -2.222937 | 3.006141  |
| 132 | 1 | 0 | -3.007780 | 3.098857  | -2.160854 | 188 | 1 | 0 | 7.187320  | -3.269072 | 2.901269  |
| 133 | 1 | 0 | -2.291497 | 5.460106  | -0.449390 | 189 | 1 | 0 | 6.777931  | -2.468854 | 0.558135  |
| 134 | 1 | 0 | -3.355787 | 2.778874  | 0.440956  | 190 | 1 | 0 | 8.206561  | -1.464997 | 0.672646  |
| 135 | 1 | 0 | -3.630277 | 3.902251  | 2.621339  | 191 | 1 | 0 | 9.631050  | -3.479321 | 0.959166  |
| 136 | 1 | 0 | -2.624198 | 5.238497  | 2.057269  | 192 | 1 | 0 | 8.209774  | -4.496447 | 0.972390  |
| 137 | 1 | 0 | -8.191104 | -1.549963 | -1.010631 | 193 | 1 | 0 | 9.202952  | -4.668909 | -1.218449 |
| 138 | 1 | 0 | -8.312665 | 0.536075  | -2.306224 | 194 | 1 | 0 | 7.700900  | -3.790996 | -1.384458 |
| 139 | 1 | 0 | -5.297549 | 0.460698  | -2.293801 | 195 | 1 | 0 | 8.969873  | -1.641265 | -1.487324 |
| 140 | 1 | 0 | -7.187256 | 2.352217  | -0.877736 | 196 | 1 | 0 | 10.466569 | -2.510772 | -1.244010 |
| 141 | 1 | 0 | -5.247996 | 0.239713  | 0.140348  | 197 | 1 | 0 | 10.096430 | -3.738856 | -3.385337 |
| 142 | 1 | 0 | -6.638346 | 0.527049  | 2.256547  | 198 | 1 | 0 | 8.595785  | -2.876397 | -3.625540 |
| 143 | 1 | 0 | -7.100611 | 2.105070  | 1.661373  | 199 | 1 | 0 | 10.431177 | -1.817145 | -4.949880 |
| 144 | 1 | 0 | -3.960021 | -6.287342 | -0.791765 | 200 | 1 | 0 | 11.363329 | -1.574055 | -3.479931 |
| 145 | 1 | 0 | -5.451130 | -5.428064 | -2.564258 | 201 | 1 | 0 | 9.855487  | -0.704297 | -3.719142 |
| 146 | 1 | 0 | -4.149287 | -2.768150 | -1.972897 | 202 | 1 | 0 | -0.009062 | 0.165098  | 2.357757  |
| 147 | 1 | 0 | -7.032970 | -3.494464 | -1.536490 | 203 | 1 | 0 | -0.349413 | 1.529358  | 3.384069  |
| 148 | 1 | 0 | -4.906235 | -2.987873 | 0.550365  | 204 | 1 | 0 | 1.701503  | 2.065017  | 3.839066  |
| 149 | 1 | 0 | -6.504579 | -3.760021 | 2.165171  |     |   |   |           |           |           |
| 150 | 1 | 0 | -7.371087 | -4.658102 | 0.933187  |     |   |   |           |           |           |
| 151 | 1 | 0 | -1.408694 | -3.248385 | -1.832252 |     |   |   |           |           |           |
| 152 | 1 | 0 | 0.379380  | -6.854676 | 0.478770  |     |   |   |           |           |           |
| 153 | 1 | 0 | 3.996938  | -0.749397 | -4.408146 |     |   |   |           |           |           |
| 154 | 1 | 0 | 0.949064  | -3.363093 | -3.359039 |     |   |   |           |           |           |
| 155 | 1 | 0 | 2.551788  | 4.324384  | -3.306902 |     |   |   |           |           |           |
| 156 | 1 | 0 | 3.547544  | 2.162366  | -5.089241 |     |   |   |           |           |           |
| 157 | 1 | 0 | 6.219258  | 2.620728  | 1.130498  |     |   |   |           |           |           |
| 158 | 1 | 0 | 1.016018  | 3.358653  | -1.923692 |     |   |   |           |           |           |
| 159 | 1 | 0 | 1.290950  | 7.588379  | -0.103014 |     |   |   |           |           |           |
| 160 | 1 | 0 | 0.021154  | 3.663015  | 2.787935  |     |   |   |           |           |           |
| 161 | 1 | 0 | -5.425196 | 3.465309  | -3.285353 |     |   |   |           |           |           |
| 162 | 1 | 0 | -1.346378 | 4.421673  | -3.003274 |     |   |   |           |           |           |
| 163 | 1 | 0 | -1.812062 | 2.499030  | 2.138539  |     |   |   |           |           |           |

  

| <b>(5R)-4b (included)</b> |  |  |        |        |        |           |          |           |                         |  |  |   |  |  |
|---------------------------|--|--|--------|--------|--------|-----------|----------|-----------|-------------------------|--|--|---|--|--|
|                           |  |  | Center |        |        | Atomic    |          |           | Coordinates (Angstroms) |  |  |   |  |  |
|                           |  |  | Number | Atomic | Atomic | X         |          |           | Y                       |  |  | Z |  |  |
|                           |  |  |        | Number | Type   |           |          |           |                         |  |  |   |  |  |
|                           |  |  | -----  |        |        |           |          |           |                         |  |  |   |  |  |
|                           |  |  | 1      | 6      | 0      | -1.069707 | 2.771117 | -2.486229 |                         |  |  |   |  |  |
|                           |  |  | 2      | 6      | 0      | -1.151612 | 4.243579 | -2.109290 |                         |  |  |   |  |  |
|                           |  |  | 3      | 6      | 0      | -2.499022 | 4.803645 | -2.554486 |                         |  |  |   |  |  |
|                           |  |  | 4      | 6      | 0      | -3.639239 | 3.961396 | -2.014179 |                         |  |  |   |  |  |
|                           |  |  | 5      | 6      | 0      | -3.458713 | 2.478200 | -2.289162 |                         |  |  |   |  |  |
|                           |  |  | 6      | 6      | 0      | -3.804532 | 1.975431 | -3.696149 |                         |  |  |   |  |  |
|                           |  |  | 7      | 6      | 0      | 4.236600  | 2.275085 | -2.631839 |                         |  |  |   |  |  |
|                           |  |  | 8      | 6      | 0      | 3.559587  | 3.551282 | -2.183890 |                         |  |  |   |  |  |
|                           |  |  | 9      | 6      | 0      | 2.220045  | 3.210086 | -1.575770 |                         |  |  |   |  |  |



|    |   |   |           |           |           |     |   |   |           |           |           |
|----|---|---|-----------|-----------|-----------|-----|---|---|-----------|-----------|-----------|
| 10 | 6 | 0 | 1.352807  | 2.545936  | -2.627037 | 66  | 8 | 0 | -4.072288 | 1.448966  | 5.394845  |
| 11 | 6 | 0 | 2.035848  | 1.286344  | -3.152764 | 67  | 8 | 0 | -2.390002 | -0.767182 | 5.827917  |
| 12 | 6 | 0 | 1.375665  | 0.740774  | -4.427674 | 68  | 8 | 0 | -2.080017 | -2.496258 | 3.572652  |
| 13 | 6 | 0 | 6.079019  | -2.310249 | -1.138902 | 69  | 8 | 0 | -5.402896 | -1.037645 | 3.093045  |
| 14 | 6 | 0 | 6.703693  | -1.233772 | -0.235459 | 70  | 8 | 0 | -3.560390 | -3.141575 | 0.838995  |
| 15 | 6 | 0 | 5.787138  | -0.020761 | -0.191161 | 71  | 8 | 0 | -3.872533 | 5.665316  | 1.668267  |
| 16 | 6 | 0 | 5.660407  | 0.631078  | -1.555280 | 72  | 8 | 0 | -4.249327 | 3.750427  | 3.670623  |
| 17 | 6 | 0 | 5.593698  | -0.452359 | -2.656628 | 73  | 8 | 0 | -4.489824 | 1.071515  | 2.756477  |
| 18 | 6 | 0 | 6.929982  | -0.561355 | -3.398441 | 74  | 8 | 0 | -5.645608 | 3.028764  | -0.110976 |
| 19 | 6 | 0 | 2.169079  | -4.519650 | 0.539624  | 75  | 8 | 0 | -5.507528 | 0.175326  | -1.082186 |
| 20 | 6 | 0 | 3.405138  | -4.486162 | 1.428657  | 76  | 7 | 0 | -4.125553 | 0.560733  | -3.513244 |
| 21 | 6 | 0 | 4.573258  | -5.100562 | 0.655970  | 77  | 8 | 0 | -0.040485 | 0.895709  | -4.436161 |
| 22 | 6 | 0 | 4.795351  | -4.388236 | -0.676652 | 78  | 6 | 0 | -5.797996 | -2.662574 | -4.878364 |
| 23 | 6 | 0 | 3.521765  | -4.206233 | -1.492757 | 79  | 7 | 0 | -5.440399 | -2.072139 | -3.819429 |
| 24 | 6 | 0 | 3.060690  | -5.438897 | -2.264113 | 80  | 8 | 0 | -6.317385 | -1.683833 | -2.807645 |
| 25 | 6 | 0 | -1.667305 | -3.697905 | 4.183083  | 81  | 6 | 0 | -3.433152 | -2.855805 | -4.795974 |
| 26 | 6 | 0 | -0.221383 | -3.528220 | 4.596082  | 82  | 6 | 0 | -3.941419 | -1.833613 | -3.769341 |
| 27 | 6 | 0 | 0.649194  | -3.248712 | 3.386751  | 83  | 6 | 0 | -4.632840 | -3.008705 | -5.772884 |
| 28 | 6 | 0 | 0.454587  | -4.321712 | 2.325340  | 84  | 6 | 0 | -3.485702 | -2.017649 | -2.331712 |
| 29 | 6 | 0 | -1.019119 | -4.477270 | 2.011183  | 85  | 6 | 0 | -3.726461 | -0.407082 | -4.333402 |
| 30 | 6 | 0 | -1.356866 | -5.628145 | 1.086653  | 86  | 8 | 0 | -3.268560 | -0.239611 | -5.452180 |
| 31 | 6 | 0 | -5.202470 | 0.257595  | 3.657514  | 87  | 6 | 0 | -0.602647 | -0.674177 | -0.288160 |
| 32 | 6 | 0 | -4.350607 | 0.124874  | 4.905280  | 88  | 6 | 0 | -1.058136 | 0.072084  | 0.985891  |
| 33 | 6 | 0 | -3.056295 | -0.585702 | 4.576082  | 89  | 6 | 0 | -0.235262 | 1.334850  | 1.308233  |
| 34 | 6 | 0 | -3.354210 | -1.909029 | 3.892715  | 90  | 6 | 0 | 1.251347  | 1.091800  | 1.634160  |
| 35 | 6 | 0 | -4.171196 | -1.665627 | 2.630041  | 91  | 6 | 0 | 1.951979  | 2.414471  | 2.012839  |
| 36 | 6 | 0 | -4.576557 | -2.896491 | 1.834027  | 92  | 6 | 0 | 3.469110  | 2.273245  | 2.241144  |
| 37 | 6 | 0 | -4.904689 | 4.237315  | 0.046289  | 93  | 6 | 0 | 4.147653  | 3.647877  | 2.414517  |
| 38 | 6 | 0 | -4.754517 | 4.553877  | 1.525229  | 94  | 6 | 0 | 5.641480  | 3.520306  | 2.769515  |
| 39 | 6 | 0 | -4.236811 | 3.357901  | 2.295610  | 95  | 6 | 0 | 6.380708  | 4.874153  | 2.810801  |
| 40 | 6 | 0 | -5.126094 | 2.155342  | 2.053484  | 96  | 6 | 0 | -2.095524 | -1.453710 | -2.089550 |
| 41 | 6 | 0 | -5.146991 | 1.842319  | 0.570302  | 97  | 8 | 0 | -1.401457 | -1.031126 | -3.017492 |
| 42 | 6 | 0 | -6.041597 | 0.683939  | 0.151762  | 98  | 7 | 0 | -1.740359 | -1.457454 | -0.807309 |
| 43 | 8 | 0 | -0.957635 | 4.426734  | -0.699778 | 99  | 6 | 0 | 5.922985  | 5.787799  | 3.965380  |
| 44 | 8 | 0 | -2.632212 | 4.662571  | -3.982815 | 100 | 6 | 0 | 6.760070  | 7.078461  | 4.093655  |
| 45 | 8 | 0 | -3.628061 | 4.139146  | -0.563628 | 101 | 6 | 0 | 6.564328  | 8.045965  | 2.909103  |
| 46 | 8 | 0 | -2.137738 | 2.065868  | -1.858509 | 102 | 1 | 0 | -1.097673 | 2.648519  | -3.549479 |
| 47 | 8 | 0 | 4.387694  | 4.234898  | -1.246396 | 103 | 1 | 0 | -0.353552 | 4.786759  | -2.591419 |
| 48 | 8 | 0 | 1.695777  | 4.459745  | -1.109661 | 104 | 1 | 0 | -2.605822 | 5.827478  | -2.223204 |
| 49 | 8 | 0 | 0.117318  | 2.180521  | -1.973709 | 105 | 1 | 0 | -4.577357 | 4.309173  | -2.421533 |
| 50 | 8 | 0 | 3.394880  | 1.619715  | -3.580259 | 106 | 1 | 0 | -4.133112 | 1.978964  | -1.632302 |
| 51 | 8 | 0 | 6.892796  | -1.707046 | 1.106458  | 107 | 1 | 0 | -2.996438 | 2.065726  | -4.399672 |
| 52 | 8 | 0 | 6.361597  | 0.927929  | 0.714540  | 108 | 1 | 0 | -4.657741 | 2.519505  | -4.081942 |
| 53 | 8 | 0 | 4.470981  | 1.439754  | -1.511138 | 109 | 1 | 0 | 5.159543  | 2.491762  | -3.147633 |
| 54 | 8 | 0 | 5.204547  | -1.723134 | -2.087610 | 110 | 1 | 0 | 3.391941  | 4.156682  | -3.067653 |
| 55 | 8 | 0 | 6.970478  | -1.855067 | -4.023571 | 111 | 1 | 0 | 2.370344  | 2.521614  | -0.761564 |
| 56 | 8 | 0 | 3.680112  | -3.132093 | 1.826350  | 112 | 1 | 0 | 1.173370  | 3.230229  | -3.445817 |
| 57 | 8 | 0 | 4.227194  | -6.465740 | 0.346123  | 113 | 1 | 0 | 2.072956  | 0.558683  | -2.356924 |
| 58 | 8 | 0 | 5.291205  | -3.096579 | -0.262740 | 114 | 1 | 0 | 1.679486  | -0.288512 | -4.579749 |
| 59 | 8 | 0 | 2.439594  | -3.751209 | -0.626649 | 115 | 1 | 0 | 1.763884  | 1.331435  | -5.243027 |
| 60 | 8 | 0 | 1.792653  | -5.152817 | -2.879167 | 116 | 1 | 0 | 6.809297  | -2.920701 | -1.645052 |
| 61 | 8 | 0 | -0.141802 | -2.420768 | 5.509173  | 117 | 1 | 0 | 7.677058  | -0.937427 | -0.589616 |
| 62 | 8 | 0 | 1.981818  | -3.209640 | 3.909043  | 118 | 1 | 0 | 4.797572  | -0.324941 | 0.119715  |
| 63 | 8 | 0 | 1.065604  | -3.845501 | 1.106111  | 119 | 1 | 0 | 6.519265  | 1.274207  | -1.701934 |
| 64 | 8 | 0 | -1.726665 | -4.775169 | 3.250029  | 120 | 1 | 0 | 4.807437  | -0.215638 | -3.348153 |
| 65 | 8 | 0 | -2.803233 | -5.736563 | 1.011806  | 121 | 1 | 0 | 7.768502  | -0.445091 | -2.721186 |

|     |   |   |           |           |           |     |   |   |           |           |           |
|-----|---|---|-----------|-----------|-----------|-----|---|---|-----------|-----------|-----------|
| 122 | 1 | 0 | 6.977972  | 0.246457  | -4.120463 | 178 | 1 | 0 | -0.336548 | 0.044125  | -1.044897 |
| 123 | 1 | 0 | 1.928209  | -5.543100 | 0.299130  | 179 | 1 | 0 | 0.233927  | -1.331708 | -0.084175 |
| 124 | 1 | 0 | 3.237868  | -5.035465 | 2.340901  | 180 | 1 | 0 | -2.078136 | 0.392590  | 0.811241  |
| 125 | 1 | 0 | 5.482057  | -5.027122 | 1.235480  | 181 | 1 | 0 | -1.066983 | -0.607607 | 1.832799  |
| 126 | 1 | 0 | 5.544405  | -4.911937 | -1.256154 | 182 | 1 | 0 | -0.309066 | 2.008812  | 0.465444  |
| 127 | 1 | 0 | 3.669842  | -3.386156 | -2.171575 | 183 | 1 | 0 | -0.693297 | 1.826310  | 2.164240  |
| 128 | 1 | 0 | 3.002035  | -6.301238 | -1.620663 | 184 | 1 | 0 | 1.750141  | 0.659511  | 0.771494  |
| 129 | 1 | 0 | 3.767119  | -5.646767 | -3.054317 | 185 | 1 | 0 | 1.342554  | 0.381851  | 2.453686  |
| 130 | 1 | 0 | -2.298176 | -3.960803 | 5.016505  | 186 | 1 | 0 | 1.490795  | 2.813638  | 2.912583  |
| 131 | 1 | 0 | 0.118938  | -4.438815 | 5.068574  | 187 | 1 | 0 | 1.782372  | 3.139491  | 1.225037  |
| 132 | 1 | 0 | 0.356541  | -2.302407 | 2.958682  | 188 | 1 | 0 | 3.646235  | 1.661063  | 3.123058  |
| 133 | 1 | 0 | 0.885578  | -5.257185 | 2.661994  | 189 | 1 | 0 | 3.931508  | 1.779438  | 1.394644  |
| 134 | 1 | 0 | -1.401735 | -3.560381 | 1.609011  | 190 | 1 | 0 | 3.622588  | 4.219580  | 3.173130  |
| 135 | 1 | 0 | -0.938610 | -6.555062 | 1.457631  | 191 | 1 | 0 | 4.063674  | 4.178415  | 1.472417  |
| 136 | 1 | 0 | -1.002120 | -5.432633 | 0.089516  | 192 | 1 | 0 | 5.742466  | 3.028520  | 3.735169  |
| 137 | 1 | 0 | -6.178444 | 0.659564  | 3.874580  | 193 | 1 | 0 | 6.101942  | 2.885617  | 2.023536  |
| 138 | 1 | 0 | -4.886279 | -0.453199 | 5.645277  | 194 | 1 | 0 | 6.239988  | 5.374926  | 1.858950  |
| 139 | 1 | 0 | -2.482887 | 0.031359  | 3.899646  | 195 | 1 | 0 | 7.446713  | 4.689722  | 2.921191  |
| 140 | 1 | 0 | -3.906254 | -2.553211 | 4.566973  | 196 | 1 | 0 | -4.169355 | -1.519252 | -1.666311 |
| 141 | 1 | 0 | -3.649010 | -0.993395 | 1.975350  | 197 | 1 | 0 | -3.503024 | -3.069454 | -2.073668 |
| 142 | 1 | 0 | -5.523137 | -2.688012 | 1.359194  | 198 | 1 | 0 | 5.995069  | 5.228738  | 4.894818  |
| 143 | 1 | 0 | -4.697195 | -3.754369 | 2.485244  | 199 | 1 | 0 | 4.880445  | 6.057574  | 3.833978  |
| 144 | 1 | 0 | -5.486400 | 4.995825  | -0.451503 | 200 | 1 | 0 | 6.482652  | 7.588911  | 5.011249  |
| 145 | 1 | 0 | -5.743188 | 4.780054  | 1.907563  | 201 | 1 | 0 | 7.810699  | 6.816435  | 4.178977  |
| 146 | 1 | 0 | -3.237618 | 3.114162  | 1.958794  | 202 | 1 | 0 | 5.515931  | 8.305052  | 2.802542  |
| 147 | 1 | 0 | -6.120674 | 2.335529  | 2.442944  | 203 | 1 | 0 | 6.899471  | 7.601999  | 1.979848  |
| 148 | 1 | 0 | -4.137334 | 1.621367  | 0.265741  | 204 | 1 | 0 | 7.124536  | 8.962237  | 3.063691  |
| 149 | 1 | 0 | -7.047455 | 1.062011  | 0.028130  |     |   |   |           |           |           |
| 150 | 1 | 0 | -6.029410 | -0.078474 | 0.915525  |     |   |   |           |           |           |
| 151 | 1 | 0 | -1.790499 | 4.272632  | -0.220193 |     |   |   |           |           |           |
| 152 | 1 | 0 | -2.035517 | 5.249163  | -4.465026 |     |   |   |           |           |           |
| 153 | 1 | 0 | 3.819895  | 4.867373  | -0.780733 |     |   |   |           |           |           |
| 154 | 1 | 0 | 0.812559  | 4.381617  | -0.693589 |     |   |   |           |           |           |
| 155 | 1 | 0 | 6.159687  | -2.303861 | 1.322888  |     |   |   |           |           |           |
| 156 | 1 | 0 | 6.622716  | 0.455327  | 1.519284  |     |   |   |           |           |           |
| 157 | 1 | 0 | 7.666293  | -1.893857 | -4.692273 |     |   |   |           |           |           |
| 158 | 1 | 0 | 3.683416  | -2.570689 | 1.036647  |     |   |   |           |           |           |
| 159 | 1 | 0 | 4.543105  | -7.086057 | 1.014877  |     |   |   |           |           |           |
| 160 | 1 | 0 | 1.313540  | -4.520377 | -2.324028 |     |   |   |           |           |           |
| 161 | 1 | 0 | 0.791638  | -2.183572 | 5.619259  |     |   |   |           |           |           |
| 162 | 1 | 0 | 2.633118  | -2.937185 | 3.230774  |     |   |   |           |           |           |
| 163 | 1 | 0 | -3.122976 | -5.914830 | 1.909098  |     |   |   |           |           |           |
| 164 | 1 | 0 | -3.395775 | 1.380619  | 6.085626  |     |   |   |           |           |           |
| 165 | 1 | 0 | -1.543905 | -1.247786 | 5.723122  |     |   |   |           |           |           |
| 166 | 1 | 0 | -3.400297 | -4.097836 | 0.714099  |     |   |   |           |           |           |
| 167 | 1 | 0 | -3.659273 | 5.756377  | 2.609075  |     |   |   |           |           |           |
| 168 | 1 | 0 | -4.085984 | 2.987585  | 4.259861  |     |   |   |           |           |           |
| 169 | 1 | 0 | -6.026817 | -0.500563 | -1.580053 |     |   |   |           |           |           |
| 170 | 1 | 0 | -4.611327 | 0.343166  | -2.665778 |     |   |   |           |           |           |
| 171 | 1 | 0 | -0.504939 | 0.207314  | -3.920551 |     |   |   |           |           |           |
| 172 | 1 | 0 | -6.831156 | -2.856275 | -5.062107 |     |   |   |           |           |           |
| 173 | 1 | 0 | -4.721906 | -4.001289 | -6.190462 |     |   |   |           |           |           |
| 174 | 1 | 0 | -4.552166 | -2.281216 | -6.570878 |     |   |   |           |           |           |
| 175 | 1 | 0 | -2.545944 | -2.488910 | -5.279150 |     |   |   |           |           |           |
| 176 | 1 | 0 | -3.238204 | -3.800026 | -4.305236 |     |   |   |           |           |           |
| 177 | 1 | 0 | -2.352049 | -1.907735 | -0.148397 |     |   |   |           |           |           |

**(5R)-4a (excluded)**

| Center Number | Atomic Number | Atomic Type | Coordinates (Angstroms) |           |           |
|---------------|---------------|-------------|-------------------------|-----------|-----------|
|               |               |             | X                       | Y         | Z         |
| 1             | 6             | 0           | 0.845623                | 2.614755  | 2.449038  |
| 2             | 6             | 0           | 0.146767                | 3.597209  | 3.369864  |
| 3             | 6             | 0           | 0.350214                | 5.002023  | 2.786140  |
| 4             | 6             | 0           | -0.113461               | 5.103421  | 1.340439  |
| 5             | 6             | 0           | 0.411692                | 3.964645  | 0.469061  |
| 6             | 6             | 0           | 1.844160                | 4.134848  | -0.061380 |
| 7             | 6             | 0           | 1.345679                | -2.014598 | 4.965722  |
| 8             | 6             | 0           | 0.195463                | -1.176712 | 5.501565  |
| 9             | 6             | 0           | -0.161029               | -0.134559 | 4.457133  |
| 10            | 6             | 0           | 1.070852                | 0.662178  | 4.018053  |
| 11            | 6             | 0           | 2.319955                | -0.170012 | 3.727236  |
| 12            | 6             | 0           | 3.624045                | 0.619018  | 3.872025  |
| 13            | 6             | 0           | 0.685042                | -6.113577 | 1.579362  |
| 14            | 6             | 0           | -0.360369               | -5.935200 | 2.667660  |
| 15            | 6             | 0           | -0.397664               | -4.462987 | 3.046994  |
| 16            | 6             | 0           | 0.962421                | -4.022943 | 3.534208  |
| 17            | 6             | 0           | 2.047665                | -4.322171 | 2.507796  |
| 18            | 6             | 0           | 3.438068                | -4.211485 | 3.106195  |
| 19            | 6             | 0           | -1.914074               | -4.068982 | -1.843732 |
| 20            | 6             | 0           | -2.314787               | -5.295300 | -1.033973 |
| 21            | 6             | 0           | -1.192454               | -6.336666 | -1.029838 |
| 22            | 6             | 0           | 0.208903                | -5.733993 | -0.850779 |
| 23            | 6             | 0           | 0.444896                | -4.486795 | -1.699845 |



|    |   |   |           |           |           |     |   |   |           |           |           |
|----|---|---|-----------|-----------|-----------|-----|---|---|-----------|-----------|-----------|
| 24 | 6 | 0 | 0.597433  | -4.739874 | -3.213489 | 80  | 6 | 0 | -0.117068 | -1.115782 | -1.985928 |
| 25 | 6 | 0 | -6.323428 | -1.297647 | -2.741419 | 81  | 8 | 0 | 2.853038  | -2.781022 | -0.681879 |
| 26 | 6 | 0 | -6.424414 | -2.367820 | -1.664604 | 82  | 6 | 0 | 3.001601  | -1.568937 | -0.585101 |
| 27 | 6 | 0 | -5.034216 | -2.589265 | -1.102128 | 83  | 7 | 0 | 4.068736  | -1.008950 | -0.005031 |
| 28 | 6 | 0 | -4.062775 | -2.957888 | -2.200172 | 84  | 6 | 0 | 5.198209  | -1.833272 | 0.455524  |
| 29 | 6 | 0 | -4.069278 | -1.908917 | -3.305164 | 85  | 6 | 0 | 6.123260  | -2.227436 | -0.707923 |
| 30 | 6 | 0 | -3.250217 | -2.249860 | -4.545601 | 86  | 6 | 0 | 6.774359  | -1.016047 | -1.396262 |
| 31 | 6 | 0 | -6.320607 | 3.958690  | -1.462413 | 87  | 6 | 0 | 7.693522  | -1.433935 | -2.560705 |
| 32 | 6 | 0 | -7.318641 | 3.000130  | -0.838908 | 88  | 6 | 0 | 8.303950  | -0.241074 | -3.326429 |
| 33 | 6 | 0 | -6.743556 | 1.604263  | -0.821524 | 89  | 6 | 0 | 9.327436  | 0.564146  | -2.501776 |
| 34 | 6 | 0 | -6.388253 | 1.158426  | -2.230862 | 90  | 6 | 0 | 9.968029  | 1.703417  | -3.318259 |
| 35 | 6 | 0 | -5.387486 | 2.149546  | -2.829762 | 91  | 6 | 0 | 10.992754 | 2.512468  | -2.499509 |
| 36 | 6 | 0 | -5.080796 | 1.957953  | -4.314542 | 92  | 6 | 0 | 11.629173 | 3.650168  | -3.322175 |
| 37 | 6 | 0 | -2.353441 | 6.129965  | 1.427817  | 93  | 6 | 0 | 12.608029 | 4.526402  | -2.512417 |
| 38 | 6 | 0 | -3.598022 | 5.731062  | 2.188204  | 94  | 6 | 0 | 13.898669 | 3.792269  | -2.099200 |
| 39 | 6 | 0 | -4.349318 | 4.671128  | 1.418057  | 95  | 6 | 0 | 14.872275 | 4.725079  | -1.352310 |
| 40 | 6 | 0 | -4.689973 | 5.150478  | 0.018440  | 96  | 6 | 0 | 2.500286  | 0.733797  | -1.619507 |
| 41 | 6 | 0 | -3.455751 | 5.680098  | -0.706739 | 97  | 6 | 0 | 2.637362  | 1.859249  | -0.617695 |
| 42 | 6 | 0 | -3.803381 | 6.534616  | -1.935599 | 98  | 8 | 0 | 3.231025  | 1.702951  | 0.455294  |
| 43 | 8 | 0 | -1.215310 | 3.219025  | 3.527199  | 99  | 6 | 0 | 0.835027  | -0.458496 | 0.098661  |
| 44 | 8 | 0 | 1.759706  | 5.288824  | 2.697029  | 100 | 7 | 0 | 1.138734  | -1.170381 | -2.128671 |
| 45 | 8 | 0 | -1.553212 | 4.973712  | 1.325939  | 101 | 8 | 0 | 1.855058  | -1.564780 | -3.283946 |
| 46 | 8 | 0 | 0.283240  | 2.702835  | 1.131240  | 102 | 1 | 0 | 1.887009  | 2.836465  | 2.437773  |
| 47 | 8 | 0 | -0.885378 | -2.030479 | 5.858564  | 103 | 1 | 0 | 0.641724  | 3.572860  | 4.335473  |
| 48 | 8 | 0 | -1.105535 | 0.779005  | 5.019243  | 104 | 1 | 0 | -0.171315 | 5.733317  | 3.392161  |
| 49 | 8 | 0 | 0.620352  | 1.269396  | 2.778533  | 105 | 1 | 0 | 0.186818  | 6.058928  | 0.931385  |
| 50 | 8 | 0 | 2.486709  | -1.215735 | 4.718472  | 106 | 1 | 0 | -0.255684 | 3.904875  | -0.377651 |
| 51 | 8 | 0 | -1.649948 | -6.382444 | 2.260838  | 107 | 1 | 0 | 2.568164  | 4.114082  | 0.730565  |
| 52 | 8 | 0 | -1.317565 | -4.260055 | 4.140136  | 108 | 1 | 0 | 1.940058  | 5.069547  | -0.597153 |
| 53 | 8 | 0 | 0.900811  | -2.604432 | 3.745298  | 109 | 1 | 0 | 1.637149  | -2.771236 | 5.676336  |
| 54 | 8 | 0 | 1.949950  | -5.718813 | 2.093920  | 110 | 1 | 0 | 0.515108  | -0.674973 | 6.401673  |
| 55 | 8 | 0 | 4.429948  | -4.540846 | 2.118433  | 111 | 1 | 0 | -0.546689 | -0.636819 | 3.583241  |
| 56 | 8 | 0 | -2.632066 | -4.918074 | 0.310235  | 112 | 1 | 0 | 1.273832  | 1.404526  | 4.776529  |
| 57 | 8 | 0 | -1.297681 | -6.966045 | -2.328486 | 113 | 1 | 0 | 2.214013  | -0.605844 | 2.749180  |
| 58 | 8 | 0 | 0.291879  | -5.273979 | 0.509902  | 114 | 1 | 0 | 4.448336  | -0.007187 | 3.552913  |
| 59 | 8 | 0 | -0.657078 | -3.590947 | -1.440953 | 115 | 1 | 0 | 3.751654  | 0.833172  | 4.921217  |
| 60 | 8 | 0 | 0.302962  | -3.549149 | -3.961018 | 116 | 1 | 0 | 0.778495  | -7.144893 | 1.274931  |
| 61 | 8 | 0 | -7.321647 | -2.048795 | -0.601933 | 117 | 1 | 0 | -0.070635 | -6.520728 | 3.527212  |
| 62 | 8 | 0 | -5.054245 | -3.681626 | -0.154182 | 118 | 1 | 0 | -0.690336 | -3.882672 | 2.186354  |
| 63 | 8 | 0 | -2.776350 | -2.980907 | -1.570847 | 119 | 1 | 0 | 1.170013  | -4.534975 | 4.466611  |
| 64 | 8 | 0 | -5.448429 | -1.762550 | -3.745282 | 120 | 1 | 0 | 1.946867  | -3.691686 | 1.641183  |
| 65 | 8 | 0 | -1.866596 | -1.978228 | -4.269969 | 121 | 1 | 0 | 3.504635  | -4.889273 | 3.949894  |
| 66 | 8 | 0 | -7.568635 | 3.334092  | 0.548833  | 122 | 1 | 0 | 3.622096  | -3.203585 | 3.439045  |
| 67 | 8 | 0 | -7.727163 | 0.684845  | -0.310739 | 123 | 1 | 0 | -1.919026 | -4.316871 | -2.891541 |
| 68 | 8 | 0 | -5.798694 | -0.132046 | -2.094642 | 124 | 1 | 0 | -3.167719 | -5.770903 | -1.498397 |
| 69 | 8 | 0 | -5.993741 | 3.476048  | -2.764012 | 125 | 1 | 0 | -1.390762 | -7.035921 | -0.229390 |
| 70 | 8 | 0 | -4.198556 | 0.854056  | -4.555905 | 126 | 1 | 0 | 0.965792  | -6.485145 | -1.054063 |
| 71 | 8 | 0 | -3.178765 | 5.200194  | 3.457049  | 127 | 1 | 0 | 1.304065  | -3.964367 | -1.321928 |
| 72 | 8 | 0 | -5.530496 | 4.417614  | 2.189039  | 128 | 1 | 0 | -0.078944 | -5.504331 | -3.548468 |
| 73 | 8 | 0 | -5.158767 | 3.958036  | -0.661426 | 129 | 1 | 0 | 1.612873  | -5.074341 | -3.397318 |
| 74 | 8 | 0 | -2.738549 | 6.607941  | 0.146625  | 130 | 1 | 0 | -7.274335 | -1.085026 | -3.203279 |
| 75 | 8 | 0 | -5.002196 | 6.115323  | -2.602614 | 131 | 1 | 0 | -6.771076 | -3.279434 | -2.127582 |
| 76 | 7 | 0 | 2.096134  | 3.026633  | -0.987555 | 132 | 1 | 0 | -4.693264 | -1.686790 | -0.621710 |
| 77 | 8 | 0 | 3.614793  | 1.880068  | 3.189700  | 133 | 1 | 0 | -4.335653 | -3.927839 | -2.597934 |
| 78 | 6 | 0 | -0.516460 | -0.560506 | -0.657296 | 134 | 1 | 0 | -3.719741 | -0.974514 | -2.913939 |
| 79 | 6 | 0 | 1.916668  | -0.581243 | -1.020185 | 135 | 1 | 0 | -3.592425 | -1.593569 | -5.329385 |

|     |   |   |           |           |           |     |   |   |           |           |           |
|-----|---|---|-----------|-----------|-----------|-----|---|---|-----------|-----------|-----------|
| 136 | 1 | 0 | -3.420897 | -3.277279 | -4.845865 | 192 | 1 | 0 | 10.834213 | 4.280131  | -3.711841 |
| 137 | 1 | 0 | -6.707466 | 4.950383  | -1.597764 | 193 | 1 | 0 | 12.881459 | 5.392542  | -3.108925 |
| 138 | 1 | 0 | -8.238548 | 3.004107  | -1.406635 | 194 | 1 | 0 | 12.105880 | 4.897332  | -1.622849 |
| 139 | 1 | 0 | -5.854141 | 1.594336  | -0.211346 | 195 | 1 | 0 | 13.656558 | 2.948164  | -1.463979 |
| 140 | 1 | 0 | -7.285157 | 1.120229  | -2.837432 | 196 | 1 | 0 | 14.383667 | 3.399816  | -2.988100 |
| 141 | 1 | 0 | -4.482058 | 2.131855  | -2.242893 | 197 | 1 | 0 | 15.152507 | 5.565223  | -1.979095 |
| 142 | 1 | 0 | -4.674195 | 2.890526  | -4.685753 | 198 | 1 | 0 | 14.410443 | 5.115040  | -0.451227 |
| 143 | 1 | 0 | -5.990040 | 1.751076  | -4.855780 | 199 | 1 | 0 | 15.776645 | 4.198414  | -1.067826 |
| 144 | 1 | 0 | -1.830896 | 6.941587  | 1.907655  | 200 | 1 | 0 | 3.467274  | 0.512680  | -2.050062 |
| 145 | 1 | 0 | -4.231703 | 6.596129  | 2.323333  | 201 | 1 | 0 | 1.854900  | 1.033755  | -2.428627 |
| 146 | 1 | 0 | -3.725254 | 3.793813  | 1.336762  | 202 | 1 | 0 | 0.925341  | -1.314961 | 0.751396  |
| 147 | 1 | 0 | -5.469179 | 5.898256  | 0.062969  | 203 | 1 | 0 | 0.904894  | 0.434066  | 0.685997  |
| 148 | 1 | 0 | -2.829672 | 4.834019  | -0.943774 | 204 | 1 | 0 | -1.210301 | -1.242091 | -0.189994 |
| 149 | 1 | 0 | -2.957379 | 6.578227  | -2.610031 |     |   |   |           |           |           |
| 150 | 1 | 0 | -4.000047 | 7.528292  | -1.571129 |     |   |   |           |           |           |
| 151 | 1 | 0 | -1.855514 | 3.941553  | 3.392265  |     |   |   |           |           |           |
| 152 | 1 | 0 | 2.215648  | 5.190885  | 3.543727  |     |   |   |           |           |           |
| 153 | 1 | 0 | -1.093665 | -2.674642 | 5.156190  |     |   |   |           |           |           |
| 154 | 1 | 0 | -1.298741 | 1.504879  | 4.396776  |     |   |   |           |           |           |
| 155 | 1 | 0 | -2.023238 | -5.805690 | 1.549987  |     |   |   |           |           |           |
| 156 | 1 | 0 | -2.116450 | -4.785793 | 3.990801  |     |   |   |           |           |           |
| 157 | 1 | 0 | 4.114486  | -5.312374 | 1.625970  |     |   |   |           |           |           |
| 158 | 1 | 0 | -3.449059 | -4.374819 | 0.308720  |     |   |   |           |           |           |
| 159 | 1 | 0 | -0.831622 | -7.811705 | -2.354964 |     |   |   |           |           |           |
| 160 | 1 | 0 | 0.969534  | -2.814939 | -3.775031 |     |   |   |           |           |           |
| 161 | 1 | 0 | -7.396947 | -1.084230 | -0.465199 |     |   |   |           |           |           |
| 162 | 1 | 0 | -5.828680 | -3.580906 | 0.420049  |     |   |   |           |           |           |
| 163 | 1 | 0 | -1.222444 | -2.720104 | -4.329691 |     |   |   |           |           |           |
| 164 | 1 | 0 | -8.260721 | 4.000803  | 0.653150  |     |   |   |           |           |           |
| 165 | 1 | 0 | -8.018099 | 0.973064  | 0.566483  |     |   |   |           |           |           |
| 166 | 1 | 0 | -3.275186 | 1.083506  | -4.389490 |     |   |   |           |           |           |
| 167 | 1 | 0 | -3.946139 | 4.803785  | 3.898966  |     |   |   |           |           |           |
| 168 | 1 | 0 | -6.150001 | 3.841620  | 1.707292  |     |   |   |           |           |           |
| 169 | 1 | 0 | -4.920972 | 5.260700  | -3.048412 |     |   |   |           |           |           |
| 170 | 1 | 0 | 1.653027  | 3.078241  | -1.879465 |     |   |   |           |           |           |
| 171 | 1 | 0 | 3.624012  | 1.773858  | 2.223557  |     |   |   |           |           |           |
| 172 | 1 | 0 | -0.985653 | 0.411075  | -0.767264 |     |   |   |           |           |           |
| 173 | 1 | 0 | -0.794181 | -1.411141 | -2.754553 |     |   |   |           |           |           |
| 174 | 1 | 0 | 4.061770  | -0.028431 | 0.193523  |     |   |   |           |           |           |
| 175 | 1 | 0 | 5.746797  | -1.246169 | 1.182124  |     |   |   |           |           |           |
| 176 | 1 | 0 | 4.824486  | -2.723981 | 0.934913  |     |   |   |           |           |           |
| 177 | 1 | 0 | 6.896516  | -2.883008 | -0.317486 |     |   |   |           |           |           |
| 178 | 1 | 0 | 5.541298  | -2.795356 | -1.424664 |     |   |   |           |           |           |
| 179 | 1 | 0 | 7.340418  | -0.452512 | -0.661027 |     |   |   |           |           |           |
| 180 | 1 | 0 | 5.995351  | -0.364989 | -1.779108 |     |   |   |           |           |           |
| 181 | 1 | 0 | 8.494183  | -2.062876 | -2.180601 |     |   |   |           |           |           |
| 182 | 1 | 0 | 7.114901  | -2.037262 | -3.254212 |     |   |   |           |           |           |
| 183 | 1 | 0 | 8.797358  | -0.612521 | -4.220466 |     |   |   |           |           |           |
| 184 | 1 | 0 | 7.505622  | 0.419528  | -3.654280 |     |   |   |           |           |           |
| 185 | 1 | 0 | 8.847092  | 0.986076  | -1.625565 |     |   |   |           |           |           |
| 186 | 1 | 0 | 10.107513 | -0.106629 | -2.151546 |     |   |   |           |           |           |
| 187 | 1 | 0 | 10.458721 | 1.285140  | -4.192991 |     |   |   |           |           |           |
| 188 | 1 | 0 | 9.187897  | 2.370531  | -3.675342 |     |   |   |           |           |           |
| 189 | 1 | 0 | 10.499672 | 2.936308  | -1.628619 |     |   |   |           |           |           |
| 190 | 1 | 0 | 11.763599 | 1.839917  | -2.139006 |     |   |   |           |           |           |
| 191 | 1 | 0 | 12.149876 | 3.228078  | -4.177567 |     |   |   |           |           |           |

  

| <b>(5R)-4a (included)</b> |        |        |                         |           |           |  |  |  |  |  |  |
|---------------------------|--------|--------|-------------------------|-----------|-----------|--|--|--|--|--|--|
| -----                     |        |        |                         |           |           |  |  |  |  |  |  |
| Center                    | Atomic | Atomic | Coordinates (Angstroms) |           |           |  |  |  |  |  |  |
| Number                    | Number | Type   | X                       | Y         | Z         |  |  |  |  |  |  |
| -----                     |        |        |                         |           |           |  |  |  |  |  |  |
| 1                         | 6      | 0      | 5.849823                | 1.777497  | -0.090013 |  |  |  |  |  |  |
| 2                         | 6      | 0      | 5.817693                | 3.278813  | 0.092627  |  |  |  |  |  |  |
| 3                         | 6      | 0      | 5.176328                | 3.879715  | -1.147252 |  |  |  |  |  |  |
| 4                         | 6      | 0      | 3.787281                | 3.298365  | -1.422613 |  |  |  |  |  |  |
| 5                         | 6      | 0      | 3.754116                | 1.759469  | -1.336674 |  |  |  |  |  |  |
| 6                         | 6      | 0      | 4.219021                | 1.120174  | -2.649772 |  |  |  |  |  |  |
| 7                         | 6      | 0      | 4.457389                | -1.812534 | 3.178712  |  |  |  |  |  |  |
| 8                         | 6      | 0      | 4.595443                | -0.425721 | 3.799852  |  |  |  |  |  |  |
| 9                         | 6      | 0      | 4.765417                | 0.622831  | 2.711816  |  |  |  |  |  |  |
| 10                        | 6      | 0      | 5.969572                | 0.214040  | 1.880194  |  |  |  |  |  |  |
| 11                        | 6      | 0      | 5.582753                | -1.074986 | 1.160771  |  |  |  |  |  |  |
| 12                        | 6      | 0      | 6.601029                | -1.561374 | 0.128851  |  |  |  |  |  |  |
| 13                        | 6      | 0      | 0.161282                | -4.747837 | 2.226636  |  |  |  |  |  |  |
| 14                        | 6      | 0      | 0.312287                | -4.014789 | 3.555368  |  |  |  |  |  |  |
| 15                        | 6      | 0      | 1.083117                | -2.723101 | 3.343275  |  |  |  |  |  |  |
| 16                        | 6      | 0      | 2.408182                | -3.063101 | 2.711156  |  |  |  |  |  |  |
| 17                        | 6      | 0      | 2.171003                | -3.688574 | 1.350671  |  |  |  |  |  |  |
| 18                        | 6      | 0      | 3.466440                | -4.078551 | 0.628088  |  |  |  |  |  |  |
| 19                        | 6      | 0      | -4.173386               | -3.247755 | 0.487876  |  |  |  |  |  |  |
| 20                        | 6      | 0      | -3.774646               | -4.010317 | 1.738504  |  |  |  |  |  |  |
| 21                        | 6      | 0      | -2.835276               | -5.143560 | 1.376710  |  |  |  |  |  |  |
| 22                        | 6      | 0      | -1.631876               | -4.669168 | 0.568130  |  |  |  |  |  |  |
| 23                        | 6      | 0      | -2.007377               | -3.747007 | -0.597311 |  |  |  |  |  |  |
| 24                        | 6      | 0      | -2.426364               | -4.544381 | -1.835484 |  |  |  |  |  |  |
| 25                        | 6      | 0      | -6.151100               | 1.375674  | -0.728188 |  |  |  |  |  |  |
| 26                        | 6      | 0      | -6.885525               | 0.932044  | 0.521077  |  |  |  |  |  |  |
| 27                        | 6      | 0      | -6.072262               | -0.168357 | 1.167093  |  |  |  |  |  |  |
| 28                        | 6      | 0      | -5.759384               | -1.292048 | 0.180569  |  |  |  |  |  |  |
| 29                        | 6      | 0      | -5.145687               | -0.816549 | -1.140235 |  |  |  |  |  |  |
| 30                        | 6      | 0      | -5.250823               | -1.846412 | -2.267540 |  |  |  |  |  |  |
| 31                        | 6      | 0      | -2.773740               | 5.396212  | 0.157729  |  |  |  |  |  |  |
| 32                        | 6      | 0      | -3.519903               | 4.877100  | 1.376355  |  |  |  |  |  |  |
| 33                        | 6      | 0      | -3.869432               | 3.416865  | 1.153841  |  |  |  |  |  |  |
| 34                        | 6      | 0      | -4.682692               | 3.268900  | -0.111093 |  |  |  |  |  |  |
| 35                        | 6      | 0      | -3.896966               | 3.829214  | -1.288563 |  |  |  |  |  |  |
| 36                        | 6      | 0      | -4.629628               | 3.779567  | -2.628233 |  |  |  |  |  |  |
| 37                        | 6      | 0      | 2.533405                | 5.180788  | -0.486138 |  |  |  |  |  |  |

|    |   |   |           |           |           |     |   |   |           |           |           |
|----|---|---|-----------|-----------|-----------|-----|---|---|-----------|-----------|-----------|
| 38 | 6 | 0 | 1.950013  | 5.507346  | 0.878306  | 94  | 6 | 0 | -1.840102 | 0.097806  | 1.727314  |
| 39 | 6 | 0 | 0.595600  | 4.839398  | 1.015298  | 95  | 6 | 0 | -2.137800 | 0.549015  | 3.177398  |
| 40 | 6 | 0 | -0.303174 | 5.275487  | -0.121496 | 96  | 6 | 0 | -1.273545 | -0.145518 | 4.244860  |
| 41 | 6 | 0 | 0.330003  | 4.826437  | -1.433245 | 97  | 6 | 0 | -1.545857 | 0.367241  | 5.676064  |
| 42 | 6 | 0 | -0.454370 | 5.210022  | -2.666555 | 98  | 6 | 0 | -2.937921 | -0.029140 | 6.207324  |
| 43 | 8 | 0 | 5.060994  | 3.656150  | 1.240862  | 99  | 8 | 0 | 2.373499  | -0.222104 | -4.117763 |
| 44 | 8 | 0 | 5.970414  | 3.505639  | -2.296601 | 100 | 6 | 0 | 3.172293  | -0.903194 | -3.461876 |
| 45 | 8 | 0 | 2.848221  | 3.796998  | -0.446703 | 101 | 6 | 0 | 3.294830  | -2.408631 | -3.707701 |
| 46 | 8 | 0 | 4.527494  | 1.266108  | -0.206335 | 102 | 1 | 0 | 6.428533  | 1.532387  | -0.962031 |
| 47 | 8 | 0 | 3.485885  | -0.083586 | 4.628375  | 103 | 1 | 0 | 6.843434  | 3.620015  | 0.173054  |
| 48 | 8 | 0 | 5.036610  | 1.903783  | 3.322423  | 104 | 1 | 0 | 5.126235  | 4.952501  | -1.051957 |
| 49 | 8 | 0 | 6.499495  | 1.241764  | 1.045800  | 105 | 1 | 0 | 3.474212  | 3.606144  | -2.410010 |
| 50 | 8 | 0 | 5.474052  | -2.074059 | 2.226790  | 106 | 1 | 0 | 2.741582  | 1.463606  | -1.127548 |
| 51 | 8 | 0 | -0.948588 | -3.775454 | 4.168882  | 107 | 1 | 0 | 5.241280  | 1.386024  | -2.856929 |
| 52 | 8 | 0 | 1.376504  | -2.095185 | 4.606154  | 108 | 1 | 0 | 3.598756  | 1.499523  | -3.444789 |
| 53 | 8 | 0 | 3.170163  | -1.859558 | 2.575057  | 109 | 1 | 0 | 4.542993  | -2.577735 | 3.933716  |
| 54 | 8 | 0 | 1.410122  | -4.918331 | 1.566324  | 110 | 1 | 0 | 5.490273  | -0.413502 | 4.407066  |
| 55 | 8 | 0 | 3.769052  | -3.139174 | -0.420795 | 111 | 1 | 0 | 3.880536  | 0.682801  | 2.100668  |
| 56 | 8 | 0 | -3.112751 | -3.125650 | 2.649445  | 112 | 1 | 0 | 6.791469  | -0.005434 | 2.545585  |
| 57 | 8 | 0 | -3.539922 | -6.039091 | 0.490544  | 113 | 1 | 0 | 4.627678  | -0.964024 | 0.687472  |
| 58 | 8 | 0 | -0.727704 | -3.963311 | 1.443093  | 114 | 1 | 0 | 7.160199  | -2.377886 | 0.566022  |
| 59 | 8 | 0 | -3.028800 | -2.788580 | -0.219676 | 115 | 1 | 0 | 7.280166  | -0.765379 | -0.125877 |
| 60 | 8 | 0 | -2.560928 | -3.683510 | -2.973445 | 116 | 1 | 0 | -0.226256 | -5.742377 | 2.381240  |
| 61 | 8 | 0 | -7.078824 | 2.069256  | 1.357167  | 117 | 1 | 0 | 0.881289  | -4.636832 | 4.231315  |
| 62 | 8 | 0 | -6.835944 | -0.712395 | 2.254087  | 118 | 1 | 0 | 0.526053  | -2.057175 | 2.703957  |
| 63 | 8 | 0 | -4.855736 | -2.118715 | 0.976931  | 119 | 1 | 0 | 2.931541  | -3.768457 | 3.345763  |
| 64 | 8 | 0 | -5.939989 | 0.310924  | -1.625467 | 120 | 1 | 0 | 1.588040  | -3.030786 | 0.730979  |
| 65 | 8 | 0 | -4.252981 | -1.637678 | -3.264398 | 121 | 1 | 0 | 3.338087  | -5.073344 | 0.224893  |
| 66 | 8 | 0 | -2.781036 | 4.994955  | 2.591493  | 122 | 1 | 0 | 4.306920  | -4.073836 | 1.300195  |
| 67 | 8 | 0 | -4.647319 | 2.935803  | 2.271897  | 123 | 1 | 0 | -4.797013 | -3.868168 | -0.130872 |
| 68 | 8 | 0 | -4.863380 | 1.863773  | -0.350644 | 124 | 1 | 0 | -4.676028 | -4.408026 | 2.188540  |
| 69 | 8 | 0 | -3.570609 | 5.218961  | -1.004790 | 125 | 1 | 0 | -2.501442 | -5.643437 | 2.276003  |
| 70 | 8 | 0 | -4.402631 | 2.535279  | -3.309045 | 126 | 1 | 0 | -1.140450 | -5.548378 | 0.172535  |
| 71 | 8 | 0 | 2.789640  | 5.085880  | 1.947643  | 127 | 1 | 0 | -1.141694 | -3.148514 | -0.835871 |
| 72 | 8 | 0 | -0.023253 | 5.248714  | 2.252204  | 128 | 1 | 0 | -3.360144 | -5.048756 | -1.666359 |
| 73 | 8 | 0 | -1.574540 | 4.634293  | 0.061421  | 129 | 1 | 0 | -1.673929 | -5.298523 | -2.033548 |
| 74 | 8 | 0 | 1.618505  | 5.489908  | -1.519357 | 130 | 1 | 0 | -6.715550 | 2.129322  | -1.252982 |
| 75 | 8 | 0 | 0.066068  | 4.398861  | -3.740904 | 131 | 1 | 0 | -7.857722 | 0.549477  | 0.253385  |
| 76 | 7 | 0 | 4.082485  | -0.343999 | -2.664478 | 132 | 1 | 0 | -5.138430 | 0.250450  | 1.507867  |
| 77 | 8 | 0 | 5.956024  | -1.968936 | -1.099195 | 133 | 1 | 0 | -6.671936 | -1.846480 | -0.002448 |
| 78 | 6 | 0 | 2.051260  | -3.325998 | -3.676823 | 134 | 1 | 0 | -4.124248 | -0.526598 | -0.990559 |
| 79 | 6 | 0 | 2.424892  | -4.774378 | -4.123811 | 135 | 1 | 0 | -6.231224 | -1.725160 | -2.704804 |
| 80 | 6 | 0 | 1.743530  | -5.700572 | -3.075789 | 136 | 1 | 0 | -5.184913 | -2.846870 | -1.864828 |
| 81 | 6 | 0 | 1.493018  | -4.754855 | -1.934866 | 137 | 1 | 0 | -2.556657 | 6.449316  | 0.235368  |
| 82 | 7 | 0 | 1.665800  | -3.551158 | -2.261527 | 138 | 1 | 0 | -4.433304 | 5.443741  | 1.485889  |
| 83 | 8 | 0 | 1.507171  | -2.410032 | -1.455990 | 139 | 1 | 0 | -2.962736 | 2.845030  | 1.063352  |
| 84 | 6 | 0 | 0.692772  | -2.985558 | -4.344213 | 140 | 1 | 0 | -5.636028 | 3.763890  | 0.007568  |
| 85 | 8 | 0 | -0.196431 | -3.841134 | -4.169503 | 141 | 1 | 0 | -2.992815 | 3.264554  | -1.392051 |
| 86 | 7 | 0 | 0.569115  | -1.883902 | -5.027062 | 142 | 1 | 0 | -4.209916 | 4.547309  | -3.257626 |
| 87 | 6 | 0 | -0.729798 | -1.381284 | -5.519788 | 143 | 1 | 0 | -5.685652 | 3.992303  | -2.500737 |
| 88 | 6 | 0 | -1.019763 | -0.026378 | -4.848643 | 144 | 1 | 0 | 3.401060  | 5.784547  | -0.680954 |
| 89 | 6 | 0 | -1.111599 | -0.135331 | -3.313812 | 145 | 1 | 0 | 1.806135  | 6.578260  | 0.940824  |
| 90 | 6 | 0 | -1.171247 | 1.260760  | -2.671062 | 146 | 1 | 0 | 0.720007  | 3.767959  | 0.991245  |
| 91 | 6 | 0 | -1.373104 | 1.220128  | -1.141269 | 147 | 1 | 0 | -0.418087 | 6.352667  | -0.106558 |
| 92 | 6 | 0 | -0.332210 | 0.409930  | -0.344410 | 148 | 1 | 0 | 0.463931  | 3.758505  | -1.425835 |
| 93 | 6 | 0 | -0.492802 | 0.619756  | 1.181346  | 149 | 1 | 0 | -0.305433 | 6.264152  | -2.862319 |

|     |   |   |           |           |           | <b>(5S)-4b (excluded)</b> |        |        |                         |           |           |
|-----|---|---|-----------|-----------|-----------|---------------------------|--------|--------|-------------------------|-----------|-----------|
|     |   |   |           |           |           | Center                    | Atomic | Atomic | Coordinates (Angstroms) |           |           |
|     |   |   |           |           |           | Number                    | Number | Type   | X                       | Y         | Z         |
|     |   |   |           |           |           | -----                     |        |        |                         |           |           |
| 150 | 1 | 0 | -1.502596 | 5.021430  | -2.492132 | 1                         | 6      | 0      | -3.274160               | 2.744261  | -1.798908 |
| 151 | 1 | 0 | 5.213636  | 3.060924  | 2.011054  | 2                         | 6      | 0      | -4.740328               | 3.139910  | -1.909777 |
| 152 | 1 | 0 | 6.743337  | 4.074562  | -2.403047 | 3                         | 6      | 0      | -5.340172               | 2.446106  | -3.137773 |
| 153 | 1 | 0 | 2.724905  | -0.680838 | 4.499677  | 4                         | 6      | 0      | -5.071792               | 0.942490  | -3.126797 |
| 154 | 1 | 0 | 4.382815  | 2.059114  | 4.022000  | 5                         | 6      | 0      | -3.617033               | 0.595167  | -2.840001 |
| 155 | 1 | 0 | -1.635472 | -3.478559 | 3.532999  | 6                         | 6      | 0      | -2.634288               | 0.760839  | -4.013761 |
| 156 | 1 | 0 | 0.577304  | -2.063950 | 5.150749  | 7                         | 6      | 0      | -0.959661               | 6.174580  | 1.480894  |
| 157 | 1 | 0 | 2.957034  | -2.671934 | -0.753850 | 8                         | 6      | 0      | -2.386465               | 5.873214  | 1.908323  |
| 158 | 1 | 0 | -3.460044 | -2.230387 | 2.523776  | 9                         | 6      | 0      | -2.857471               | 4.598540  | 1.223233  |
| 159 | 1 | 0 | -4.142589 | -6.626482 | 0.964695  | 10                        | 6      | 0      | -2.543830               | 4.599141  | -0.274671 |
| 160 | 1 | 0 | -1.739049 | -3.685319 | -3.511063 | 11                        | 6      | 0      | -1.133418               | 5.043955  | -0.621855 |
| 161 | 1 | 0 | -6.266341 | 2.301688  | 1.848306  | 12                        | 6      | 0      | -0.904038               | 5.352516  | -2.092170 |
| 162 | 1 | 0 | -6.308240 | -1.391028 | 2.694641  | 13                        | 6      | 0      | 3.523236                | 3.886421  | 3.310370  |
| 163 | 1 | 0 | -3.586578 | -2.353966 | -3.202714 | 14                        | 6      | 0      | 2.440052                | 4.094660  | 4.351960  |
| 164 | 1 | 0 | -1.810265 | 4.990508  | 2.450754  | 15                        | 6      | 0      | 1.091445                | 4.182753  | 3.662071  |
| 165 | 1 | 0 | -4.249279 | 3.270130  | 3.090013  | 16                        | 6      | 0      | 1.088970                | 5.213249  | 2.548534  |
| 166 | 1 | 0 | -4.781321 | 1.770555  | -2.848275 | 17                        | 6      | 0      | 2.192671                | 4.892490  | 1.550542  |
| 167 | 1 | 0 | 3.515072  | 4.502213  | 1.635429  | 18                        | 6      | 0      | 2.430910                | 5.897531  | 0.431581  |
| 168 | 1 | 0 | 0.629218  | 5.179143  | 2.965786  | 19                        | 6      | 0      | 2.914563                | -0.836523 | 2.288742  |
| 169 | 1 | 0 | -0.575463 | 4.318573  | -4.457628 | 20                        | 6      | 0      | 3.174743                | -0.214533 | 3.654249  |
| 170 | 1 | 0 | 4.752359  | -0.884136 | -2.132415 | 21                        | 6      | 0      | 4.401188                | 0.687323  | 3.562310  |
| 171 | 1 | 0 | 3.497999  | -4.899295 | -4.076862 | 22                        | 6      | 0      | 4.305412                | 1.695807  | 2.421011  |
| 172 | 1 | 0 | 2.085050  | -4.980738 | -5.125686 | 23                        | 6      | 0      | 3.895253                | 1.073896  | 1.095552  |
| 173 | 1 | 0 | 2.369071  | -6.530648 | -2.780696 | 24                        | 6      | 0      | 4.998202                | 0.361905  | 0.320276  |
| 174 | 1 | 0 | 1.208701  | -5.018266 | -0.938548 | 25                        | 6      | 0      | -0.654830               | -4.739345 | 3.117037  |
| 175 | 1 | 0 | 0.796147  | -6.062702 | -3.447148 | 26                        | 6      | 0      | -0.364537               | -3.798197 | 4.270317  |
| 176 | 1 | 0 | 5.208413  | -2.571659 | -0.869729 | 27                        | 6      | 0      | 0.153665                | -2.500290 | 3.689791  |
| 177 | 1 | 0 | 1.295592  | -1.178096 | -4.929497 | 28                        | 6      | 0      | 1.429001                | -2.722017 | 2.906487  |
| 178 | 1 | 0 | -0.675524 | -1.275481 | -6.595831 | 29                        | 6      | 0      | 1.237472                | -3.808798 | 1.846551  |
| 179 | 1 | 0 | -1.493657 | -2.102527 | -5.279402 | 30                        | 6      | 0      | 2.526294                | -4.431003 | 1.332161  |
| 180 | 1 | 0 | -1.954940 | 0.360706  | -5.238500 | 31                        | 6      | 0      | -5.285117               | -4.649024 | 0.380447  |
| 181 | 1 | 0 | -0.229699 | 0.669239  | -5.113778 | 32                        | 6      | 0      | -5.236119               | -4.706075 | 1.899955  |
| 182 | 1 | 0 | -2.008899 | -0.684642 | -3.057294 | 33                        | 6      | 0      | -3.960969               | -4.053407 | 2.380401  |
| 183 | 1 | 0 | -0.249052 | -0.667119 | -2.933422 | 34                        | 6      | 0      | -2.767899               | -4.784745 | 1.800609  |
| 184 | 1 | 0 | -2.016263 | 1.793463  | -3.096282 | 35                        | 6      | 0      | -2.827994               | -4.740927 | 0.273732  |
| 185 | 1 | 0 | -0.273318 | 1.817852  | -2.919893 | 36                        | 6      | 0      | -1.819284               | -5.646537 | -0.432146 |
| 186 | 1 | 0 | -1.352507 | 2.236483  | -0.765481 | 37                        | 6      | 0      | -7.013434               | -0.267750 | -2.188354 |
| 187 | 1 | 0 | -2.365087 | 0.835319  | -0.948956 | 38                        | 6      | 0      | -7.591953               | -0.513942 | -0.812990 |
| 188 | 1 | 0 | -0.398048 | -0.644549 | -0.579431 | 39                        | 6      | 0      | -6.643729               | -1.386200 | -0.023177 |
| 189 | 1 | 0 | 0.663457  | 0.732615  | -0.634602 | 40                        | 6      | 0      | -6.375633               | -2.695453 | -0.739702 |
| 190 | 1 | 0 | 0.327742  | 0.130733  | 1.696720  | 41                        | 6      | 0      | -5.924640               | -2.470089 | -2.179424 |
| 191 | 1 | 0 | -0.414876 | 1.682365  | 1.395277  | 42                        | 6      | 0      | -6.068826               | -3.726048 | -3.049993 |
| 192 | 1 | 0 | -2.638316 | 0.471952  | 1.100975  | 43                        | 8      | 0      | -5.452627               | 2.852400  | -0.705150 |
| 193 | 1 | 0 | -1.863287 | -0.984146 | 1.648629  | 44                        | 8      | 0      | -4.666254               | 3.039361  | -4.269034 |
| 194 | 1 | 0 | -3.187085 | 0.367771  | 3.389080  | 45                        | 8      | 0      | -5.801267               | 0.423164  | -1.982136 |
| 195 | 1 | 0 | -1.991095 | 1.623773  | 3.245429  | 46                        | 8      | 0      | -3.180954               | 1.327134  | -1.684847 |
| 196 | 1 | 0 | -1.454039 | -1.215391 | 4.214092  | 47                        | 8      | 0      | -2.420051               | 5.788173  | 3.334036  |
| 197 | 1 | 0 | -0.225935 | 0.010555  | 4.014730  | 48                        | 8      | 0      | -4.272702               | 4.490594  | 1.400128  |
| 198 | 1 | 0 | -0.790706 | -0.034105 | 6.346600  | 49                        | 8      | 0      | -2.655621               | 3.194900  | -0.624752 |
| 199 | 1 | 0 | -1.440321 | 1.447552  | 5.694957  | 50                        | 8      | 0      | -0.844794               | 6.280500  | 0.080311  |
| 200 | 1 | 0 | -3.059225 | -1.107363 | 6.180289  | 51                        | 8      | 0      | 2.445923                | 3.024119  | 5.298687  |
| 201 | 1 | 0 | -3.065122 | 0.299072  | 7.233261  | 52                        | 8      | 0      | 0.078243                | 4.587046  | 4.603237  |
| 202 | 1 | 0 | -3.728059 | 0.417818  | 5.616317  |                           |        |        |                         |           |           |
| 203 | 1 | 0 | 3.999055  | -2.836696 | -3.011050 |                           |        |        |                         |           |           |
| 204 | 1 | 0 | 3.723830  | -2.487840 | -4.702466 |                           |        |        |                         |           |           |

|     |   |   |           |           |           |     |   |   |           |           |           |
|-----|---|---|-----------|-----------|-----------|-----|---|---|-----------|-----------|-----------|
| 53  | 8 | 0 | -0.196548 | 5.065300  | 1.946938  | 109 | 1 | 0 | -0.604442 | 7.097610  | 1.910821  |
| 54  | 8 | 0 | 3.451502  | 4.877185  | 2.303025  | 110 | 1 | 0 | -3.034914 | 6.683417  | 1.616268  |
| 55  | 8 | 0 | 3.634389  | 5.498222  | -0.263708 | 111 | 1 | 0 | -2.326344 | 3.761044  | 1.650696  |
| 56  | 8 | 0 | 2.063456  | 0.531008  | 4.144740  | 112 | 1 | 0 | -3.284799 | 5.207077  | -0.776694 |
| 57  | 8 | 0 | 5.495317  | -0.223635 | 3.301668  | 113 | 1 | 0 | -0.458302 | 4.269845  | -0.303182 |
| 58  | 8 | 0 | 3.257319  | 2.603637  | 2.768230  | 114 | 1 | 0 | -1.327498 | 6.322198  | -2.304382 |
| 59  | 8 | 0 | 2.797693  | 0.148098  | 1.268289  | 115 | 1 | 0 | -1.389689 | 4.605082  | -2.701297 |
| 60  | 8 | 0 | 4.379031  | -0.267220 | -0.829614 | 116 | 1 | 0 | 4.512169  | 3.938830  | 3.740477  |
| 61  | 8 | 0 | -1.502556 | -3.521220 | 5.082722  | 117 | 1 | 0 | 2.624173  | 5.011360  | 4.890671  |
| 62  | 8 | 0 | 0.455154  | -1.586042 | 4.765811  | 118 | 1 | 0 | 0.854787  | 3.220626  | 3.230650  |
| 63  | 8 | 0 | 1.655808  | -1.483216 | 2.217793  | 119 | 1 | 0 | 1.217397  | 6.205277  | 2.964278  |
| 64  | 8 | 0 | 0.548905  | -4.981098 | 2.397720  | 120 | 1 | 0 | 2.024286  | 3.914641  | 1.131960  |
| 65  | 8 | 0 | 3.355912  | -3.380585 | 0.782492  | 121 | 1 | 0 | 2.546122  | 6.888991  | 0.855082  |
| 66  | 8 | 0 | -6.304052 | -3.940556 | 2.504878  | 122 | 1 | 0 | 1.637288  | 5.895528  | -0.293744 |
| 67  | 8 | 0 | -3.870108 | -4.150289 | 3.816261  | 123 | 1 | 0 | 3.706674  | -1.524702 | 2.066686  |
| 68  | 8 | 0 | -1.595237 | -4.100839 | 2.266701  | 124 | 1 | 0 | 3.432449  | -1.011087 | 4.341588  |
| 69  | 8 | 0 | -4.115984 | -5.297563 | -0.119603 | 125 | 1 | 0 | 4.513997  | 1.213541  | 4.500349  |
| 70  | 8 | 0 | -0.462032 | -5.228065 | -0.243802 | 126 | 1 | 0 | 5.250220  | 2.217199  | 2.300851  |
| 71  | 8 | 0 | -7.730480 | 0.758716  | -0.178630 | 127 | 1 | 0 | 3.487180  | 1.856646  | 0.481369  |
| 72  | 8 | 0 | -7.294275 | -1.606291 | 1.236471  | 128 | 1 | 0 | 5.509172  | -0.360853 | 0.934878  |
| 73  | 8 | 0 | -5.280090 | -3.292965 | 0.006248  | 129 | 1 | 0 | 5.709146  | 1.073619  | -0.066856 |
| 74  | 8 | 0 | -6.794577 | -1.512436 | -2.838389 | 130 | 1 | 0 | -1.015227 | -5.698522 | 3.452723  |
| 75  | 8 | 0 | -5.831610 | -4.942189 | -2.324194 | 131 | 1 | 0 | 0.394150  | -4.246337 | 4.895256  |
| 76  | 7 | 0 | -1.279428 | 0.593886  | -3.499203 | 132 | 1 | 0 | -0.587869 | -2.077281 | 3.032823  |
| 77  | 8 | 0 | 0.498637  | 5.398557  | -2.384540 | 133 | 1 | 0 | 2.231809  | -2.969764 | 3.588514  |
| 78  | 6 | 0 | 1.438907  | -2.816466 | -1.868852 | 134 | 1 | 0 | 0.647726  | -3.406708 | 1.046165  |
| 79  | 6 | 0 | 0.386358  | -0.588300 | -2.144613 | 135 | 1 | 0 | 2.275164  | -5.160619 | 0.575729  |
| 80  | 6 | 0 | 1.971848  | -2.028583 | -3.030427 | 136 | 1 | 0 | 3.020980  | -4.927306 | 2.156774  |
| 81  | 6 | 0 | 3.392278  | 3.083766  | -2.728627 | 137 | 1 | 0 | -6.118722 | -5.176657 | -0.041892 |
| 82  | 6 | 0 | 4.758343  | 2.569538  | -3.208698 | 138 | 1 | 0 | -5.266126 | -5.734752 | 2.231982  |
| 83  | 6 | 0 | 4.616865  | 1.589853  | -4.389796 | 139 | 1 | 0 | -3.947303 | -3.023121 | 2.062995  |
| 84  | 6 | 0 | 5.925410  | 0.857789  | -4.755202 | 140 | 1 | 0 | -2.772904 | -5.811662 | 2.147946  |
| 85  | 6 | 0 | 6.530455  | 0.045211  | -3.587753 | 141 | 1 | 0 | -2.734723 | -3.721293 | -0.062259 |
| 86  | 6 | 0 | 7.543050  | -1.009817 | -4.073550 | 142 | 1 | 0 | -2.014725 | -5.600731 | -1.490615 |
| 87  | 6 | 0 | 8.194142  | -1.781096 | -2.908807 | 143 | 1 | 0 | -1.984455 | -6.666276 | -0.101442 |
| 88  | 6 | 0 | 9.182110  | -2.858291 | -3.398398 | 144 | 1 | 0 | -7.688079 | 0.285399  | -2.821112 |
| 89  | 6 | 0 | 9.915387  | -3.598162 | -2.258261 | 145 | 1 | 0 | -8.543309 | -1.020517 | -0.911780 |
| 90  | 6 | 0 | 8.989259  | -4.505308 | -1.423973 | 146 | 1 | 0 | -5.707455 | -0.863067 | 0.095820  |
| 91  | 6 | 0 | 9.722593  | -5.247208 | -0.285279 | 147 | 1 | 0 | -7.252352 | -3.326194 | -0.694994 |
| 92  | 6 | 0 | -0.936595 | -0.560528 | -2.934404 | 148 | 1 | 0 | -4.912645 | -2.101745 | -2.148664 |
| 93  | 8 | 0 | -1.640719 | -1.568579 | -2.985333 | 149 | 1 | 0 | -5.436976 | -3.645949 | -3.924708 |
| 94  | 6 | 0 | 0.426650  | -1.824790 | -1.209262 | 150 | 1 | 0 | -7.096687 | -3.765838 | -3.368433 |
| 95  | 7 | 0 | 1.439726  | -0.888182 | -3.149752 | 151 | 1 | 0 | -5.782982 | 1.939479  | -0.687597 |
| 96  | 8 | 0 | 1.664679  | 0.062208  | -4.128924 | 152 | 1 | 0 | -5.204930 | 3.018097  | -5.069937 |
| 97  | 6 | 0 | 0.688168  | 0.724481  | -1.395425 | 153 | 1 | 0 | -1.681642 | 5.243433  | 3.658273  |
| 98  | 6 | 0 | 1.329021  | 1.856629  | -2.196616 | 154 | 1 | 0 | -4.644308 | 3.794157  | 0.827581  |
| 99  | 8 | 0 | 0.613921  | 2.682148  | -2.796412 | 155 | 1 | 0 | 2.275940  | 2.166730  | 4.849153  |
| 100 | 7 | 0 | 2.644490  | 1.981542  | -2.083814 | 156 | 1 | 0 | 0.133924  | 4.031683  | 5.393939  |
| 101 | 6 | 0 | 10.708546 | -6.318589 | -0.792375 | 157 | 1 | 0 | 4.326010  | 5.385978  | 0.402659  |
| 102 | 1 | 0 | -2.761853 | 3.088419  | -2.680480 | 158 | 1 | 0 | 1.331050  | -0.087217 | 4.351244  |
| 103 | 1 | 0 | -4.817228 | 4.201225  | -2.080117 | 159 | 1 | 0 | 6.339346  | 0.121819  | 3.618854  |
| 104 | 1 | 0 | -6.406297 | 2.633694  | -3.156909 | 160 | 1 | 0 | 3.675717  | -0.851361 | -0.508935 |
| 105 | 1 | 0 | -5.412521 | 0.464341  | -4.036377 | 161 | 1 | 0 | -2.346986 | -3.663666 | 4.607042  |
| 106 | 1 | 0 | -3.577574 | -0.433105 | -2.538613 | 162 | 1 | 0 | -0.268657 | -1.623917 | 5.410940  |
| 107 | 1 | 0 | -2.717580 | 1.729497  | -4.471515 | 163 | 1 | 0 | 4.197359  | -3.737012 | 0.467590  |
| 108 | 1 | 0 | -2.849731 | -0.000500 | -4.752566 | 164 | 1 | 0 | -7.143322 | -4.420194 | 2.525864  |

|     |   |   |           |           |           |    |   |   |           |           |           |
|-----|---|---|-----------|-----------|-----------|----|---|---|-----------|-----------|-----------|
| 165 | 1 | 0 | -4.682343 | -3.804663 | 4.214980  | 11 | 6 | 0 | -0.145535 | -4.301619 | 0.105243  |
| 166 | 1 | 0 | -0.154721 | -5.408424 | 0.655922  | 12 | 6 | 0 | 1.008801  | -4.497993 | -0.853177 |
| 167 | 1 | 0 | -7.897019 | 0.623577  | 0.765908  | 13 | 6 | 0 | -6.300123 | -1.708712 | -0.576733 |
| 168 | 1 | 0 | -6.796115 | -2.239285 | 1.780231  | 14 | 6 | 0 | -5.768585 | -1.751740 | 0.840892  |
| 169 | 1 | 0 | -4.904433 | -5.063827 | -2.077510 | 15 | 6 | 0 | -4.371024 | -2.335563 | 0.820743  |
| 170 | 1 | 0 | -0.664877 | 1.389943  | -3.460366 | 16 | 6 | 0 | -4.304131 | -3.687510 | 0.132212  |
| 171 | 1 | 0 | 0.775512  | 4.495330  | -2.622938 | 17 | 6 | 0 | -4.949948 | -3.618620 | -1.252632 |
| 172 | 1 | 0 | 0.942587  | -3.721684 | -2.192617 | 18 | 6 | 0 | -5.294838 | -4.964906 | -1.864501 |
| 173 | 1 | 0 | 2.717519  | -2.341650 | -3.727125 | 19 | 6 | 0 | -4.055951 | 2.097379  | -2.286180 |
| 174 | 1 | 0 | 2.809134  | 3.432257  | -3.567713 | 20 | 6 | 0 | -5.172754 | 2.108502  | -1.248797 |
| 175 | 1 | 0 | 3.505477  | 3.893466  | -2.019561 | 21 | 6 | 0 | -6.373125 | 1.302342  | -1.737340 |
| 176 | 1 | 0 | 5.258963  | 2.086353  | -2.377429 | 22 | 6 | 0 | -5.971088 | -0.031495 | -2.360872 |
| 177 | 1 | 0 | 5.366813  | 3.419964  | -3.500988 | 23 | 6 | 0 | -4.846155 | 0.086496  | -3.383327 |
| 178 | 1 | 0 | 3.834361  | 0.872896  | -4.178993 | 24 | 6 | 0 | -5.246984 | 0.708178  | -4.724524 |
| 179 | 1 | 0 | 4.281729  | 2.154834  | -5.255782 | 25 | 6 | 0 | -0.534913 | 5.884946  | -1.116821 |
| 180 | 1 | 0 | 5.712238  | 0.182264  | -5.579593 | 26 | 6 | 0 | -1.741449 | 5.715834  | -0.203435 |
| 181 | 1 | 0 | 6.664582  | 1.570257  | -5.112752 | 27 | 6 | 0 | -2.168045 | 4.262923  | -0.274876 |
| 182 | 1 | 0 | 7.038073  | 0.720240  | -2.904907 | 28 | 6 | 0 | -2.519915 | 3.905706  | -1.698675 |
| 183 | 1 | 0 | 5.739766  | -0.433021 | -3.020025 | 29 | 6 | 0 | -1.308153 | 4.118539  | -2.594121 |
| 184 | 1 | 0 | 7.038002  | -1.713297 | -4.730363 | 30 | 6 | 0 | -1.565640 | 3.925394  | -4.089906 |
| 185 | 1 | 0 | 8.318982  | -0.524482 | -4.659893 | 31 | 6 | 0 | 4.393320  | 4.616467  | 0.543072  |
| 186 | 1 | 0 | 8.722587  | -1.079433 | -2.268436 | 32 | 6 | 0 | 3.535048  | 5.568650  | 1.363639  |
| 187 | 1 | 0 | 7.411061  | -2.236062 | -2.311354 | 33 | 6 | 0 | 2.084678  | 5.274798  | 1.037869  |
| 188 | 1 | 0 | 8.651613  | -3.581632 | -4.012017 | 34 | 6 | 0 | 1.824056  | 5.433202  | -0.440757 |
| 189 | 1 | 0 | 9.920671  | -2.381694 | -4.036744 | 35 | 6 | 0 | 2.762599  | 4.547847  | -1.259889 |
| 190 | 1 | 0 | 10.708103 | -4.198949 | -2.690276 | 36 | 6 | 0 | 2.791867  | 4.859593  | -2.754883 |
| 191 | 1 | 0 | 10.385440 | -2.869085 | -1.603337 | 37 | 6 | 0 | 5.292615  | 0.129899  | 3.312981  |
| 192 | 1 | 0 | 8.197881  | -3.902409 | -0.991630 | 38 | 6 | 0 | 4.387378  | 1.172835  | 3.935101  |
| 193 | 1 | 0 | 8.518415  | -5.233795 | -2.079125 | 39 | 6 | 0 | 3.717689  | 1.982494  | 2.837399  |
| 194 | 1 | 0 | 10.253508 | -4.525004 | 0.327885  | 40 | 6 | 0 | 4.747724  | 2.561313  | 1.884269  |
| 195 | 1 | 0 | 8.986539  | -5.727034 | 0.353258  | 41 | 6 | 0 | 5.503149  | 1.387696  | 1.267505  |
| 196 | 1 | 0 | 0.767489  | -1.538527 | -0.226673 | 42 | 6 | 0 | 6.554926  | 1.755758  | 0.235948  |
| 197 | 1 | 0 | -0.547035 | -2.274806 | -1.152590 | 43 | 8 | 0 | 2.334399  | -2.061225 | 3.888032  |
| 198 | 1 | 0 | 2.225406  | -3.077938 | -1.177546 | 44 | 8 | 0 | 5.037409  | -4.305636 | 2.873426  |
| 199 | 1 | 0 | -0.252480 | 1.112384  | -1.022227 | 45 | 8 | 0 | 4.383779  | -0.761046 | 2.696159  |
| 200 | 1 | 0 | 1.321259  | 0.499370  | -0.551525 | 46 | 8 | 0 | 2.854725  | -2.688836 | 0.988053  |
| 201 | 1 | 0 | 10.194114 | -7.039736 | -1.419107 | 47 | 8 | 0 | -3.388244 | -5.176654 | 2.581833  |
| 202 | 1 | 0 | 11.509121 | -5.875819 | -1.371717 | 48 | 8 | 0 | -0.822216 | -4.767326 | 3.732669  |
| 203 | 1 | 0 | 11.155602 | -6.852652 | 0.039167  | 49 | 8 | 0 | 1.021812  | -3.473882 | 2.083039  |
| 204 | 1 | 0 | 3.183561  | 1.219172  | -1.716959 | 50 | 8 | 0 | -1.096996 | -5.332750 | -0.283664 |

**(5S)-4b (included)**

| Center Number | Atomic Number | Atomic Type | Coordinates (Angstroms) |           |          |
|---------------|---------------|-------------|-------------------------|-----------|----------|
|               |               |             | X                       | Y         | Z        |
| 1             | 6             | 0           | 2.426954                | -3.592418 | 1.995946 |
| 2             | 6             | 0           | 2.956734                | -3.246139 | 3.381712 |
| 3             | 6             | 0           | 4.461150                | -3.057609 | 3.320638 |
| 4             | 6             | 0           | 4.865929                | -2.043137 | 2.265831 |
| 5             | 6             | 0           | 4.249409                | -2.310205 | 0.897117 |
| 6             | 6             | 0           | 5.075686                | -3.298583 | 0.070401 |
| 7             | 6             | 0           | -2.372893               | -5.231832 | 0.332348 |
| 8             | 6             | 0           | -2.177611               | -5.377551 | 1.835116 |
| 9             | 6             | 0           | -1.119393               | -4.421215 | 2.368257 |
| 10            | 6             | 0           | 0.165645                | -4.517258 | 1.576812 |

|    |   |   |           |           |           |
|----|---|---|-----------|-----------|-----------|
| 51 | 8 | 0 | -5.748517 | -0.458650 | 1.445652  |
| 52 | 8 | 0 | -3.925956 | -2.540145 | 2.186283  |
| 53 | 8 | 0 | -2.892419 | -3.945499 | 0.013618  |
| 54 | 8 | 0 | -6.264353 | -3.009478 | -1.134808 |
| 55 | 8 | 0 | -4.076225 | -5.712910 | -2.027730 |
| 56 | 8 | 0 | -4.732790 | 1.612983  | 0.016102  |
| 57 | 8 | 0 | -7.030462 | 2.041619  | -2.787358 |
| 58 | 8 | 0 | -5.445669 | -0.830425 | -1.281778 |
| 59 | 8 | 0 | -3.749492 | 0.810863  | -2.783830 |
| 60 | 8 | 0 | -4.099154 | 0.804265  | -5.574837 |
| 61 | 8 | 0 | -1.483115 | 6.062599  | 1.154362  |
| 62 | 8 | 0 | -3.334557 | 4.032163  | 0.546513  |
| 63 | 8 | 0 | -2.839454 | 2.509773  | -1.692897 |
| 64 | 8 | 0 | -0.884739 | 5.511420  | -2.453371 |
| 65 | 8 | 0 | -2.280856 | 2.698087  | -4.363856 |
| 66 | 8 | 0 | 3.752198  | 5.485833  | 2.770454  |

|     |   |   |           |           |           |     |   |   |           |           |           |
|-----|---|---|-----------|-----------|-----------|-----|---|---|-----------|-----------|-----------|
| 67  | 8 | 0 | 1.218399  | 6.213662  | 1.719901  | 123 | 1 | 0 | -4.329608 | 2.756135  | -3.091209 |
| 68  | 8 | 0 | 0.462730  | 5.010080  | -0.638488 | 124 | 1 | 0 | -5.492130 | 3.138694  | -1.132839 |
| 69  | 8 | 0 | 4.118807  | 4.841370  | -0.826589 | 125 | 1 | 0 | -7.032006 | 1.121800  | -0.898120 |
| 70  | 8 | 0 | 1.553561  | 4.571312  | -3.414775 | 126 | 1 | 0 | -6.838273 | -0.498561 | -2.808355 |
| 71  | 8 | 0 | 3.376502  | 0.577354  | 4.751481  | 127 | 1 | 0 | -4.447245 | -0.897190 | -3.565089 |
| 72  | 8 | 0 | 2.968774  | 3.050505  | 3.463709  | 128 | 1 | 0 | -5.736086 | 1.656844  | -4.581637 |
| 73  | 8 | 0 | 4.043080  | 3.268623  | 0.849711  | 129 | 1 | 0 | -5.946529 | 0.045579  | -5.214151 |
| 74  | 8 | 0 | 6.168166  | 0.707488  | 2.365583  | 130 | 1 | 0 | -0.192188 | 6.906396  | -1.156629 |
| 75  | 8 | 0 | 7.137511  | 0.587969  | -0.349636 | 131 | 1 | 0 | -2.541605 | 6.344601  | -0.567515 |
| 76  | 8 | 0 | 0.506108  | -4.321468 | -2.199070 | 132 | 1 | 0 | -1.356400 | 3.638683  | 0.057826  |
| 77  | 6 | 0 | 4.446577  | -2.421995 | -3.565893 | 133 | 1 | 0 | -3.356691 | 4.505406  | -2.034478 |
| 78  | 6 | 0 | 5.107022  | -1.384876 | -4.494900 | 134 | 1 | 0 | -0.509107 | 3.477007  | -2.264002 |
| 79  | 6 | 0 | 6.382010  | -2.101390 | -5.038108 | 135 | 1 | 0 | -0.615658 | 3.942476  | -4.602614 |
| 80  | 6 | 0 | 6.104724  | -3.550849 | -4.731431 | 136 | 1 | 0 | -2.186026 | 4.730704  | -4.448061 |
| 81  | 7 | 0 | 5.106664  | -3.707388 | -3.974061 | 137 | 1 | 0 | 5.445836  | 4.793924  | 0.695132  |
| 82  | 8 | 0 | 4.606353  | -4.916991 | -3.479829 | 138 | 1 | 0 | 3.776860  | 6.577157  | 1.064226  |
| 83  | 6 | 0 | 2.942647  | -2.622138 | -3.732037 | 139 | 1 | 0 | 1.850423  | 4.267969  | 1.341648  |
| 84  | 6 | 0 | -0.063170 | -0.489393 | -2.861740 | 140 | 1 | 0 | 1.942572  | 6.475182  | -0.714313 |
| 85  | 6 | 0 | -0.571050 | -0.324540 | -1.421308 | 141 | 1 | 0 | 2.522561  | 3.513136  | -1.084551 |
| 86  | 6 | 0 | 0.548354  | 0.053472  | -0.428179 | 142 | 1 | 0 | 3.540807  | 4.231924  | -3.207426 |
| 87  | 6 | 0 | -0.015942 | 0.625324  | 0.891242  | 143 | 1 | 0 | 3.093879  | 5.894185  | -2.881183 |
| 88  | 6 | 0 | -0.814059 | -0.417748 | 1.695233  | 144 | 1 | 0 | 5.910176  | -0.367565 | 4.044103  |
| 89  | 6 | 0 | -1.427618 | 0.131687  | 3.001799  | 145 | 1 | 0 | 4.966447  | 1.840016  | 4.555991  |
| 90  | 6 | 0 | -2.576872 | 1.130302  | 2.748934  | 146 | 1 | 0 | 3.046409  | 1.348960  | 2.280472  |
| 91  | 6 | 0 | -3.333138 | 1.545712  | 4.032085  | 147 | 1 | 0 | 5.425062  | 3.219192  | 2.413526  |
| 92  | 6 | 0 | -4.285225 | 0.444148  | 4.543264  | 148 | 1 | 0 | 4.784561  | 0.728258  | 0.808989  |
| 93  | 6 | 0 | -5.061007 | 0.843235  | 5.816671  | 149 | 1 | 0 | 7.357930  | 2.290663  | 0.720158  |
| 94  | 6 | 0 | -6.120157 | 1.936966  | 5.576091  | 150 | 1 | 0 | 6.089412  | 2.394761  | -0.505093 |
| 95  | 7 | 0 | 4.675932  | -3.289181 | -1.333825 | 151 | 1 | 0 | 1.392005  | -2.104743 | 3.663881  |
| 96  | 6 | 0 | 4.836373  | -2.204229 | -2.094675 | 152 | 1 | 0 | 5.140982  | -4.940112 | 3.593917  |
| 97  | 8 | 0 | 5.261052  | -1.124024 | -1.687333 | 153 | 1 | 0 | -3.628361 | -4.226040 | 2.579727  |
| 98  | 8 | 0 | 2.649144  | -0.246837 | -3.603829 | 154 | 1 | 0 | -1.659219 | -4.943579 | 4.187238  |
| 99  | 6 | 0 | 2.159604  | -1.357030 | -3.420771 | 155 | 1 | 0 | -5.343411 | 0.224238  | 0.860900  |
| 100 | 7 | 0 | 0.903577  | -1.579812 | -3.013752 | 156 | 1 | 0 | -4.106312 | -1.747710 | 2.711364  |
| 101 | 6 | 0 | -6.920057 | 2.248229  | 6.856499  | 157 | 1 | 0 | -4.225140 | -6.517814 | -2.539370 |
| 102 | 1 | 0 | 2.721029  | -4.601608 | 1.753370  | 158 | 1 | 0 | -4.100364 | 2.257277  | 0.388621  |
| 103 | 1 | 0 | 2.725074  | -4.088869 | 4.023658  | 159 | 1 | 0 | -7.591635 | 2.745186  | -2.436846 |
| 104 | 1 | 0 | 4.840341  | -2.754851 | 4.287563  | 160 | 1 | 0 | -3.516759 | 1.528812  | -5.291578 |
| 105 | 1 | 0 | 5.942063  | -2.020314 | 2.171713  | 161 | 1 | 0 | -0.528020 | 6.046822  | 1.382309  |
| 106 | 1 | 0 | 4.238270  | -1.376744 | 0.371739  | 162 | 1 | 0 | -3.215240 | 4.512925  | 1.380809  |
| 107 | 1 | 0 | 4.979405  | -4.298852 | 0.454426  | 163 | 1 | 0 | -1.959305 | 1.957352  | -3.831177 |
| 108 | 1 | 0 | 6.115499  | -3.002927 | 0.149305  | 164 | 1 | 0 | 3.464189  | 4.613907  | 3.122208  |
| 109 | 1 | 0 | -2.987178 | -6.002680 | -0.085609 | 165 | 1 | 0 | 1.575420  | 6.390554  | 2.603376  |
| 110 | 1 | 0 | -1.851014 | -6.387960 | 2.029833  | 166 | 1 | 0 | 0.851985  | 5.193798  | -3.180629 |
| 111 | 1 | 0 | -1.498860 | -3.413410 | 2.293090  | 167 | 1 | 0 | 3.069827  | -0.267569 | 4.360605  |
| 112 | 1 | 0 | 0.617947  | -5.487833 | 1.738605  | 168 | 1 | 0 | 2.476429  | 2.681951  | 4.213647  |
| 113 | 1 | 0 | -0.584308 | -3.330410 | -0.040349 | 169 | 1 | 0 | 6.484129  | 0.071529  | -0.852375 |
| 114 | 1 | 0 | 1.413776  | -5.495776 | -0.736756 | 170 | 1 | 0 | 5.324191  | -0.487053 | -3.947122 |
| 115 | 1 | 0 | 1.773142  | -3.760562 | -0.696419 | 171 | 1 | 0 | 4.436296  | -1.143480 | -5.302480 |
| 116 | 1 | 0 | -7.328906 | -1.385643 | -0.612633 | 172 | 1 | 0 | 7.277012  | -1.780788 | -4.515774 |
| 117 | 1 | 0 | -6.409806 | -2.381874 | 1.438461  | 173 | 1 | 0 | 6.664802  | -4.395876 | -5.066041 |
| 118 | 1 | 0 | -3.708104 | -1.658347 | 0.308143  | 174 | 1 | 0 | 6.527329  | -1.938083 | -6.097173 |
| 119 | 1 | 0 | -4.788279 | -4.433860 | 0.743135  | 175 | 1 | 0 | -0.290800 | -4.865658 | -2.293595 |
| 120 | 1 | 0 | -4.313360 | -3.043824 | -1.903406 | 176 | 1 | 0 | -0.909255 | -0.675271 | -3.515922 |
| 121 | 1 | 0 | -5.784259 | -4.785409 | -2.812711 | 177 | 1 | 0 | 0.435162  | 0.411922  | -3.187344 |
| 122 | 1 | 0 | -5.991072 | -5.471385 | -1.208120 | 178 | 1 | 0 | -1.337867 | 0.442389  | -1.429420 |

|     |   |   |           |           |           |    |   |   |           |           |           |
|-----|---|---|-----------|-----------|-----------|----|---|---|-----------|-----------|-----------|
| 179 | 1 | 0 | -1.050220 | -1.247207 | -1.112700 | 25 | 6 | 0 | -3.978388 | 4.633821  | -0.905135 |
| 180 | 1 | 0 | 1.187466  | 0.800751  | -0.891144 | 26 | 6 | 0 | -3.169932 | 4.995381  | -2.148786 |
| 181 | 1 | 0 | 1.170442  | -0.808002 | -0.210182 | 27 | 6 | 0 | -1.837359 | 4.273896  | -2.048323 |
| 182 | 1 | 0 | 0.805689  | 0.983016  | 1.506317  | 28 | 6 | 0 | -1.170615 | 4.610251  | -0.722559 |
| 183 | 1 | 0 | -0.643536 | 1.478345  | 0.659568  | 29 | 6 | 0 | -2.033614 | 4.317256  | 0.485198  |
| 184 | 1 | 0 | -1.620235 | -0.809765 | 1.086032  | 30 | 6 | 0 | -1.516724 | 4.904121  | 1.792853  |
| 185 | 1 | 0 | -0.155500 | -1.249146 | 1.918003  | 31 | 6 | 0 | -7.147798 | 0.344070  | -0.405396 |
| 186 | 1 | 0 | -1.803466 | -0.706387 | 3.580372  | 32 | 6 | 0 | -7.226304 | 1.220526  | -1.643966 |
| 187 | 1 | 0 | -0.657603 | 0.612215  | 3.600103  | 33 | 6 | 0 | -5.883952 | 1.888610  | -1.883243 |
| 188 | 1 | 0 | -2.182522 | 2.018208  | 2.267898  | 34 | 6 | 0 | -5.422634 | 2.634047  | -0.646485 |
| 189 | 1 | 0 | -3.286093 | 0.690136  | 2.056581  | 35 | 6 | 0 | -5.325111 | 1.647210  | 0.510996  |
| 190 | 1 | 0 | -3.912955 | 2.437369  | 3.818671  | 36 | 6 | 0 | -4.940144 | 2.230978  | 1.867572  |
| 191 | 1 | 0 | -2.620511 | 1.803322  | 4.811233  | 37 | 6 | 0 | -5.085102 | -4.505367 | -1.288474 |
| 192 | 1 | 0 | -4.987292 | 0.195774  | 3.752924  | 38 | 6 | 0 | -5.368003 | -3.725678 | -2.553412 |
| 193 | 1 | 0 | -3.703460 | -0.446290 | 4.766954  | 39 | 6 | 0 | -5.475593 | -2.262923 | -2.180154 |
| 194 | 1 | 0 | -5.562250 | -0.035682 | 6.213110  | 40 | 6 | 0 | -6.528426 | -1.988787 | -1.118248 |
| 195 | 1 | 0 | -4.360563 | 1.180431  | 6.576214  | 41 | 6 | 0 | -6.422749 | -2.971998 | 0.059760  |
| 196 | 1 | 0 | -6.797698 | 1.606217  | 4.794976  | 42 | 6 | 0 | -7.724297 | -3.163805 | 0.821260  |
| 197 | 1 | 0 | -5.642020 | 2.844751  | 5.226522  | 43 | 8 | 0 | -1.707859 | -3.699443 | -2.384252 |
| 198 | 1 | 0 | 4.502070  | -4.155883 | -1.832561 | 44 | 8 | 0 | -1.366607 | -6.420300 | 0.099246  |
| 199 | 1 | 0 | 2.757595  | -2.857799 | -4.776257 | 45 | 8 | 0 | -3.872306 | -3.962630 | -0.780960 |
| 200 | 1 | 0 | 2.605562  | -3.467579 | -3.159787 | 46 | 8 | 0 | -1.325394 | -3.049338 | 0.257039  |
| 201 | 1 | 0 | 0.614235  | -2.521382 | -2.804440 | 47 | 8 | 0 | 3.681568  | -2.515605 | -4.573138 |
| 202 | 1 | 0 | -7.432649 | 1.360204  | 7.211294  | 48 | 8 | 0 | 1.111923  | -3.734211 | -3.576895 |
| 203 | 1 | 0 | -7.662545 | 3.018087  | 6.676079  | 49 | 8 | 0 | 0.485138  | -2.862154 | -0.977071 |
| 204 | 1 | 0 | -6.259095 | 2.593983  | 7.644540  | 50 | 8 | 0 | 4.121510  | -2.775059 | -0.938777 |

(5S)-4a (excluded)

| Center Number | Atomic Number | Atomic Type | Coordinates (Angstroms) |           |           |
|---------------|---------------|-------------|-------------------------|-----------|-----------|
|               |               |             | X                       | Y         | Z         |
| 1             | 6             | 0           | -0.360084               | -3.845771 | -0.411341 |
| 2             | 6             | 0           | -1.084103               | -4.638244 | -1.482684 |
| 3             | 6             | 0           | -2.101270               | -5.539919 | -0.777240 |
| 4             | 6             | 0           | -3.056849               | -4.745203 | 0.117129  |
| 5             | 6             | 0           | -2.347527               | -3.737643 | 1.026875  |
| 6             | 6             | 0           | -1.757081               | -4.335392 | 2.317923  |
| 7             | 6             | 0           | 4.346557                | -2.350421 | -2.286125 |
| 8             | 6             | 0           | 3.412291                | -3.043563 | -3.279905 |
| 9             | 6             | 0           | 1.967642                | -2.857033 | -2.830007 |
| 10            | 6             | 0           | 1.832837                | -3.216567 | -1.361994 |
| 11            | 6             | 0           | 2.789309                | -2.430895 | -0.488111 |
| 12            | 6             | 0           | 2.675252                | -2.763664 | 0.992917  |
| 13            | 6             | 0           | 5.369739                | 2.897659  | -2.427843 |
| 14            | 6             | 0           | 4.820032                | 2.367645  | -3.743002 |
| 15            | 6             | 0           | 4.102465                | 1.052532  | -3.490521 |
| 16            | 6             | 0           | 4.961652                | 0.056387  | -2.745142 |
| 17            | 6             | 0           | 5.557729                | 0.680135  | -1.492208 |
| 18            | 6             | 0           | 6.632879                | -0.166797 | -0.842152 |
| 19            | 6             | 0           | 1.240163                | 4.456035  | -0.484186 |
| 20            | 6             | 0           | 1.830105                | 4.793495  | -1.851956 |
| 21            | 6             | 0           | 3.269167                | 5.283799  | -1.727551 |
| 22            | 6             | 0           | 4.109531                | 4.362823  | -0.842408 |
| 23            | 6             | 0           | 3.410610                | 3.977710  | 0.459050  |
| 24            | 6             | 0           | 3.359083                | 5.089617  | 1.514384  |



|     |   |   |           |           |           |     |   |   |           |           |           |
|-----|---|---|-----------|-----------|-----------|-----|---|---|-----------|-----------|-----------|
| 81  | 6 | 0 | -1.484565 | -0.031137 | 6.070368  | 137 | 1 | 0 | -8.089688 | -0.076222 | -0.120665 |
| 82  | 6 | 0 | -1.077098 | -0.064076 | 4.577301  | 138 | 1 | 0 | -7.967225 | 1.986717  | -1.473336 |
| 83  | 6 | 0 | -2.793277 | 0.806334  | 6.059647  | 139 | 1 | 0 | -5.150664 | 1.137001  | -2.137564 |
| 84  | 8 | 0 | -0.793154 | 2.173988  | 3.730310  | 140 | 1 | 0 | -6.147250 | 3.400597  | -0.400398 |
| 85  | 6 | 0 | -0.258367 | 1.179447  | 4.206448  | 141 | 1 | 0 | -4.655271 | 0.840918  | 0.263030  |
| 86  | 7 | 0 | 1.047042  | 1.118936  | 4.477799  | 142 | 1 | 0 | -5.460953 | 1.626948  | 2.602757  |
| 87  | 6 | 0 | 1.937020  | 2.229321  | 4.080955  | 143 | 1 | 0 | -5.289266 | 3.248662  | 1.957167  |
| 88  | 6 | 0 | 3.347208  | 2.049100  | 4.649294  | 144 | 1 | 0 | -5.001654 | -5.565142 | -1.470601 |
| 89  | 6 | 0 | 4.041177  | 0.750423  | 4.190297  | 145 | 1 | 0 | -6.296918 | -4.068079 | -2.981598 |
| 90  | 6 | 0 | 5.523657  | 0.701991  | 4.617348  | 146 | 1 | 0 | -4.531030 | -1.928033 | -1.786785 |
| 91  | 6 | 0 | 6.153864  | -0.700691 | 4.484876  | 147 | 1 | 0 | -7.510224 | -2.005807 | -1.569931 |
| 92  | 6 | 0 | 6.155578  | -1.244969 | 3.044606  | 148 | 1 | 0 | -5.636746 | -2.612634 | 0.701440  |
| 93  | 6 | 0 | 6.770132  | -2.657243 | 2.952209  | 149 | 1 | 0 | -7.532376 | -3.794396 | 1.679405  |
| 94  | 6 | 0 | 6.832294  | -3.154015 | 1.494681  | 150 | 1 | 0 | -8.422465 | -3.671440 | 0.168189  |
| 95  | 6 | 0 | 7.212111  | -4.641644 | 1.368855  | 151 | 1 | 0 | -1.952243 | -2.917418 | -1.861795 |
| 96  | 6 | 0 | 7.108216  | -5.155155 | -0.084132 | 152 | 1 | 0 | -1.054906 | -7.214808 | -0.352824 |
| 97  | 6 | 0 | 8.200284  | -4.591778 | -1.014777 | 153 | 1 | 0 | 3.547501  | -1.550096 | -4.608030 |
| 98  | 6 | 0 | 8.080274  | -5.153648 | -2.445337 | 154 | 1 | 0 | 0.188083  | -3.446621 | -3.504988 |
| 99  | 6 | 0 | -0.374310 | -1.336012 | 4.109386  | 155 | 1 | 0 | 3.117544  | 3.412478  | -3.806996 |
| 100 | 6 | 0 | -1.333053 | -2.498112 | 3.891601  | 156 | 1 | 0 | 3.326753  | 1.068935  | -5.326438 |
| 101 | 8 | 0 | -2.353068 | -2.658060 | 4.545022  | 157 | 1 | 0 | 7.448479  | 1.415831  | -0.011098 |
| 102 | 1 | 0 | 0.171751  | -4.499803 | 0.257401  | 158 | 1 | 0 | 1.770396  | 2.832938  | -2.055821 |
| 103 | 1 | 0 | -0.391210 | -5.219304 | -2.068474 | 159 | 1 | 0 | 2.983081  | 7.274935  | -1.663901 |
| 104 | 1 | 0 | -2.676476 | -6.091933 | -1.508572 | 160 | 1 | 0 | 1.592591  | 4.672246  | 2.390821  |
| 105 | 1 | 0 | -3.665643 | -5.420944 | 0.701888  | 161 | 1 | 0 | -4.517575 | 3.944900  | -3.194548 |
| 106 | 1 | 0 | -3.034390 | -2.950285 | 1.289243  | 162 | 1 | 0 | -0.249870 | 4.078586  | -3.228769 |
| 107 | 1 | 0 | -1.206131 | -5.237974 | 2.110299  | 163 | 1 | 0 | -0.338206 | 3.527038  | 2.613690  |
| 108 | 1 | 0 | -2.562833 | -4.560507 | 3.000789  | 164 | 1 | 0 | -6.977190 | -0.175589 | -3.069106 |
| 109 | 1 | 0 | 5.379324  | -2.548581 | -2.517352 | 165 | 1 | 0 | -6.539862 | 2.474547  | -3.663888 |
| 110 | 1 | 0 | 3.628965  | -4.099378 | -3.313678 | 166 | 1 | 0 | -3.121700 | 1.358230  | 2.114065  |
| 111 | 1 | 0 | 1.690906  | -1.819790 | -2.955644 | 167 | 1 | 0 | -3.456413 | -3.866200 | -3.159285 |
| 112 | 1 | 0 | 2.007244  | -4.278182 | -1.240847 | 168 | 1 | 0 | -5.295544 | -1.775243 | -4.101006 |
| 113 | 1 | 0 | 2.618435  | -1.376861 | -0.629413 | 169 | 1 | 0 | -8.926762 | -1.920621 | 1.839605  |
| 114 | 1 | 0 | 3.442819  | -2.240607 | 1.536897  | 170 | 1 | 0 | -0.045469 | -3.109223 | 2.455783  |
| 115 | 1 | 0 | 2.798493  | -3.826251 | 1.147392  | 171 | 1 | 0 | 0.793461  | -2.053009 | 0.780331  |
| 116 | 1 | 0 | 5.956902  | 3.790859  | -2.570678 | 172 | 1 | 0 | -4.253456 | 0.799011  | 4.284403  |
| 117 | 1 | 0 | 5.638828  | 2.206058  | -4.426433 | 173 | 1 | 0 | -2.594644 | 1.863609  | 6.195867  |
| 118 | 1 | 0 | 3.231612  | 1.243397  | -2.884084 | 174 | 1 | 0 | -3.504787 | 0.476963  | 6.802449  |
| 119 | 1 | 0 | 5.725766  | -0.329953 | -3.407105 | 175 | 1 | 0 | -1.715180 | -1.042545 | 6.368431  |
| 120 | 1 | 0 | 4.769408  | 0.895417  | -0.791476 | 176 | 1 | 0 | -0.712787 | 0.389448  | 6.696933  |
| 121 | 1 | 0 | 7.399571  | -0.392152 | -1.575470 | 177 | 1 | 0 | 1.454837  | 0.291378  | 4.847396  |
| 122 | 1 | 0 | 6.205185  | -1.079816 | -0.468208 | 178 | 1 | 0 | 1.976282  | 2.289806  | 3.004140  |
| 123 | 1 | 0 | 1.135718  | 5.341885  | 0.115285  | 179 | 1 | 0 | 1.512617  | 3.154044  | 4.436890  |
| 124 | 1 | 0 | 1.211526  | 5.522035  | -2.347836 | 180 | 1 | 0 | 3.914949  | 2.907628  | 4.311013  |
| 125 | 1 | 0 | 3.721892  | 5.333347  | -2.708619 | 181 | 1 | 0 | 3.313188  | 2.078766  | 5.734242  |
| 126 | 1 | 0 | 5.070916  | 4.819020  | -0.647197 | 182 | 1 | 0 | 3.965204  | 0.670265  | 3.111750  |
| 127 | 1 | 0 | 3.914578  | 3.120738  | 0.874558  | 183 | 1 | 0 | 3.535296  | -0.114347 | 4.613381  |
| 128 | 1 | 0 | 3.028098  | 6.018449  | 1.082688  | 184 | 1 | 0 | 6.088398  | 1.411480  | 4.020247  |
| 129 | 1 | 0 | 4.359169  | 5.241020  | 1.896332  | 185 | 1 | 0 | 5.599964  | 1.020881  | 5.653492  |
| 130 | 1 | 0 | -4.931134 | 5.139336  | -0.898464 | 186 | 1 | 0 | 7.177454  | -0.660916 | 4.846594  |
| 131 | 1 | 0 | -2.984778 | 6.059805  | -2.144543 | 187 | 1 | 0 | 5.614532  | -1.391180 | 5.129238  |
| 132 | 1 | 0 | -2.010277 | 3.209956  | -2.099388 | 188 | 1 | 0 | 5.133365  | -1.303179 | 2.685376  |
| 133 | 1 | 0 | -0.909152 | 5.662215  | -0.745507 | 189 | 1 | 0 | 6.683845  | -0.565840 | 2.384727  |
| 134 | 1 | 0 | -2.214206 | 3.266882  | 0.591156  | 190 | 1 | 0 | 7.771108  | -2.650763 | 3.374658  |
| 135 | 1 | 0 | -2.243387 | 4.671122  | 2.556373  | 191 | 1 | 0 | 6.173922  | -3.345077 | 3.547086  |
| 136 | 1 | 0 | -1.425060 | 5.975713  | 1.694446  | 192 | 1 | 0 | 5.868192  | -3.009578 | 1.018890  |

|     |   |   |          |           |           |    |   |   |           |          |           |
|-----|---|---|----------|-----------|-----------|----|---|---|-----------|----------|-----------|
| 193 | 1 | 0 | 7.548021 | -2.541556 | 0.958350  | 39 | 6 | 0 | -4.238005 | 2.567236 | 1.551364  |
| 194 | 1 | 0 | 8.219212 | -4.802494 | 1.743769  | 40 | 6 | 0 | -5.412735 | 1.714314 | 1.103531  |
| 195 | 1 | 0 | 6.540821 | -5.224036 | 1.994379  | 41 | 6 | 0 | -5.661618 | 1.839658 | -0.395283 |
| 196 | 1 | 0 | 7.180361 | -6.239434 | -0.087975 | 42 | 6 | 0 | -7.041158 | 1.356024 | -0.845855 |
| 197 | 1 | 0 | 6.130276 | -4.891416 | -0.478468 | 43 | 8 | 0 | -0.831281 | 4.417832 | -0.895343 |
| 198 | 1 | 0 | 8.134141 | -3.510027 | -1.047962 | 44 | 8 | 0 | -2.357232 | 4.517599 | -4.272404 |
| 199 | 1 | 0 | 9.176170 | -4.841000 | -0.609248 | 45 | 8 | 0 | -3.351534 | 3.411811 | -0.989876 |
| 200 | 1 | 0 | 8.171325 | -6.234668 | -2.439339 | 46 | 8 | 0 | -1.288337 | 1.940253 | -2.358511 |
| 201 | 1 | 0 | 7.116957 | -4.901064 | -2.877262 | 47 | 8 | 0 | 4.804564  | 4.233232 | -0.196259 |
| 202 | 1 | 0 | 8.854673 | -4.752990 | -3.090263 | 48 | 8 | 0 | 1.959716  | 4.643639 | -0.596793 |
| 203 | 1 | 0 | 0.169726 | -1.156748 | 3.198044  | 49 | 8 | 0 | 0.827961  | 2.621820 | -2.298741 |
| 204 | 1 | 0 | 0.337783 | -1.640238 | 4.870795  | 50 | 8 | 0 | 4.262472  | 2.897166 | -3.533595 |

(5S)-4a (included)

| Center Number | Atomic Number | Atomic Type | Coordinates (Angstroms) |           |           |    |   |   |           |           |           |
|---------------|---------------|-------------|-------------------------|-----------|-----------|----|---|---|-----------|-----------|-----------|
|               |               |             | X                       | Y         | Z         |    |   |   |           |           |           |
| 1             | 6             | 0           | -0.426056               | 2.978555  | -2.833123 | 51 | 8 | 0 | 4.966809  | 0.050722  | 2.859052  |
| 2             | 6             | 0           | -0.916078               | 4.321390  | -2.319330 | 52 | 8 | 0 | 4.156042  | 2.058153  | 1.256014  |
| 3             | 6             | 0           | -2.341932               | 4.540544  | -2.832859 | 53 | 8 | 0 | 4.777770  | 1.744619  | -1.615642 |
| 4             | 6             | 0           | -3.246788               | 3.383220  | -2.437956 | 54 | 8 | 0 | 6.309930  | -0.908390 | -0.362562 |
| 5             | 6             | 0           | -2.657221               | 2.018531  | -2.788102 | 55 | 8 | 0 | 8.912156  | -0.434809 | -0.674343 |
| 6             | 6             | 0           | -2.816441               | 1.623654  | -4.258936 | 56 | 8 | 0 | 3.106502  | -2.552835 | 2.715683  |
| 7             | 6             | 0           | 4.856347                | 3.024047  | -2.264391 | 57 | 8 | 0 | 5.180792  | -5.508638 | 1.942163  |
| 8             | 6             | 0           | 4.118793                | 4.067224  | -1.440085 | 58 | 8 | 0 | 5.332309  | -1.969055 | 1.411401  |
| 9             | 6             | 0           | 2.677720                | 3.614679  | -1.285407 | 59 | 8 | 0 | 3.234975  | -3.508316 | 0.044450  |
| 10            | 6             | 0           | 2.034687                | 3.346113  | -2.643553 | 60 | 8 | 0 | 4.054239  | -4.954897 | -2.120376 |
| 11            | 6             | 0           | 2.879086                | 2.459057  | -3.553616 | 61 | 8 | 0 | -1.588705 | -3.767440 | 5.006624  |
| 12            | 6             | 0           | 2.522160                | 2.588780  | -5.039387 | 62 | 8 | 0 | 1.101182  | -3.809328 | 4.072599  |
| 13            | 6             | 0           | 6.290752                | -0.999766 | 1.055861  | 63 | 8 | 0 | 1.356678  | -3.966115 | 1.125979  |
| 14            | 6             | 0           | 5.737202                | 0.296176  | 1.677453  | 64 | 8 | 0 | -1.893130 | -5.473273 | 1.802372  |
| 15            | 6             | 0           | 4.842638                | 0.954252  | 0.637995  | 65 | 8 | 0 | -1.729768 | -6.213817 | -0.828499 |
| 16            | 6             | 0           | 5.674961                | 1.462818  | -0.526649 | 66 | 8 | 0 | -5.202712 | 0.207450  | 4.116017  |
| 17            | 6             | 0           | 6.677689                | 0.364411  | -0.942615 | 67 | 8 | 0 | -3.620865 | -2.014100 | 4.570879  |
| 18            | 6             | 0           | 8.108691                | 0.750501  | -0.568726 | 68 | 8 | 0 | -2.636557 | -3.324878 | 2.352338  |
| 19            | 6             | 0           | 2.725061                | -4.317179 | 1.108680  | 69 | 8 | 0 | -5.737227 | -1.777066 | 1.083867  |
| 20            | 6             | 0           | 3.438099                | -3.920554 | 2.394355  | 70 | 8 | 0 | -3.516728 | -4.235504 | -0.447944 |
| 21            | 6             | 0           | 4.940469                | -4.112816 | 2.219456  | 71 | 8 | 0 | -3.125270 | 4.696598  | 1.339005  |
| 22            | 6             | 0           | 5.477121                | -3.348465 | 1.016748  | 72 | 8 | 0 | -4.177476 | 2.651679  | 2.981971  |
| 23            | 6             | 0           | 4.664480                | -3.572028 | -0.250364 | 73 | 8 | 0 | -4.963832 | 0.371711  | 1.400558  |
| 24            | 6             | 0           | 4.955883                | -4.866618 | -1.000631 | 74 | 8 | 0 | -5.666260 | 3.236444  | -0.786275 |
| 25            | 6             | 0           | -2.321679               | -4.632025 | 2.848452  | 75 | 8 | 0 | -7.440825 | 0.126962  | -0.224805 |
| 26            | 6             | 0           | -1.185699               | -4.486120 | 3.854970  | 76 | 7 | 0 | -2.561308 | 0.196513  | -4.425563 |
| 27            | 6             | 0           | 0.009147                | -3.856941 | 3.146489  | 77 | 8 | 0 | 1.117693  | 2.612277  | -5.303826 |
| 28            | 6             | 0           | 0.397880                | -4.703918 | 1.935932  | 78 | 6 | 0 | -3.471266 | -4.112621 | -3.423473 |
| 29            | 6             | 0           | -0.789482               | -4.949900 | 1.020023  | 79 | 7 | 0 | -3.112615 | -2.906719 | -3.542756 |
| 30            | 6             | 0           | -0.550610               | -6.018695 | -0.029364 | 80 | 8 | 0 | -3.968873 | -1.811436 | -3.289934 |
| 31            | 6             | 0           | -5.831024               | -0.621398 | 1.903336  | 81 | 6 | 0 | -1.230884 | -4.199984 | -4.176780 |
| 32            | 6             | 0           | -5.359000               | -0.979554 | 3.296693  | 82 | 6 | 0 | -1.658017 | -2.736555 | -3.814268 |
| 33            | 6             | 0           | -3.986576               | -1.604219 | 3.241711  | 83 | 6 | 0 | -2.361000 | -5.096117 | -3.608881 |
| 34            | 6             | 0           | -3.980547               | -2.832875 | 2.338947  | 84 | 8 | 0 | -1.437450 | -2.887098 | -1.441446 |
| 35            | 6             | 0           | -4.410071               | -2.378347 | 0.939434  | 85 | 6 | 0 | -0.985186 | -2.393626 | -2.478322 |
| 36            | 6             | 0           | -4.665340               | -3.453181 | -0.115401 | 86 | 7 | 0 | 0.141050  | -1.704014 | -2.540960 |
| 37            | 6             | 0           | -4.518949               | 3.997363  | -0.438273 | 87 | 6 | 0 | 1.079150  | -1.583073 | -1.397883 |
| 38            | 6             | 0           | -4.340210               | 3.991637  | 1.062175  | 88 | 6 | 0 | -1.371943 | -1.808981 | -4.999115 |
|               |               |             |                         |           |           | 89 | 6 | 0 | -1.385253 | -0.301844 | -4.759716 |
|               |               |             |                         |           |           | 90 | 8 | 0 | -0.335745 | 0.330044  | -4.934679 |
|               |               |             |                         |           |           | 91 | 6 | 0 | 0.910866  | -0.270054 | -0.616534 |
|               |               |             |                         |           |           | 92 | 6 | 0 | -0.246649 | -0.317217 | 0.400232  |
|               |               |             |                         |           |           | 93 | 6 | 0 | -0.597357 | 1.076187  | 0.957805  |
|               |               |             |                         |           |           | 94 | 6 | 0 | 0.552446  | 1.764858  | 1.717849  |

|     |   |   |           |           |           |     |   |   |           |           |           |
|-----|---|---|-----------|-----------|-----------|-----|---|---|-----------|-----------|-----------|
| 95  | 6 | 0 | 0.100738  | 3.095898  | 2.358311  | 151 | 1 | 0 | -1.638810 | 4.103550  | -0.454661 |
| 96  | 6 | 0 | 1.289837  | 3.988931  | 2.762546  | 152 | 1 | 0 | -1.823307 | 5.224329  | -4.658347 |
| 97  | 6 | 0 | 0.839778  | 5.271887  | 3.487503  | 153 | 1 | 0 | 4.419665  | 3.656829  | 0.488705  |
| 98  | 6 | 0 | 2.031433  | 6.180277  | 3.849374  | 154 | 1 | 0 | 1.006505  | 4.439664  | -0.529751 |
| 99  | 6 | 0 | 1.617188  | 7.516344  | 4.501024  | 155 | 1 | 0 | 4.595529  | -0.847948 | 2.831152  |
| 100 | 6 | 0 | 1.015323  | 7.357968  | 5.911041  | 156 | 1 | 0 | 3.877363  | 1.789318  | 2.145390  |
| 101 | 6 | 0 | 0.676318  | 8.721381  | 6.545536  | 157 | 1 | 0 | 9.852534  | -0.219451 | -0.625837 |
| 102 | 1 | 0 | -0.386638 | 2.998388  | -3.898820 | 158 | 1 | 0 | 2.949158  | -2.075905 | 1.886915  |
| 103 | 1 | 0 | -0.281202 | 5.101280  | -2.717375 | 159 | 1 | 0 | 5.184383  | -6.043314 | 2.746499  |
| 104 | 1 | 0 | -2.734205 | 5.468959  | -2.437311 | 160 | 1 | 0 | 3.189038  | -4.631385 | -1.831363 |
| 105 | 1 | 0 | -4.224164 | 3.497726  | -2.881573 | 161 | 1 | 0 | -2.232897 | -3.067838 | 4.792804  |
| 106 | 1 | 0 | -3.170754 | 1.283549  | -2.191236 | 162 | 1 | 0 | 1.684632  | -3.062790 | 3.861508  |
| 107 | 1 | 0 | -2.161293 | 2.189901  | -4.894146 | 163 | 1 | 0 | -2.507231 | -5.816820 | -0.393089 |
| 108 | 1 | 0 | -3.834769 | 1.814542  | -4.571116 | 164 | 1 | 0 | -6.032933 | 0.492192  | 4.520309  |
| 109 | 1 | 0 | 5.885928  | 3.309967  | -2.419022 | 165 | 1 | 0 | -3.658251 | -1.252049 | 5.166238  |
| 110 | 1 | 0 | 4.144387  | 5.008450  | -1.967456 | 166 | 1 | 0 | -2.793055 | -3.690385 | -0.819899 |
| 111 | 1 | 0 | 2.667155  | 2.690610  | -0.734973 | 167 | 1 | 0 | -2.871013 | 4.540842  | 2.260451  |
| 112 | 1 | 0 | 1.815358  | 4.290330  | -3.121803 | 168 | 1 | 0 | -4.289259 | 1.773912  | 3.386767  |
| 113 | 1 | 0 | 2.808137  | 1.447246  | -3.190448 | 169 | 1 | 0 | -6.865188 | -0.619161 | -0.446778 |
| 114 | 1 | 0 | 3.028998  | 1.806759  | -5.592386 | 170 | 1 | 0 | -3.267035 | -0.475722 | -4.110409 |
| 115 | 1 | 0 | 2.916625  | 3.538169  | -5.365665 | 171 | 1 | 0 | 0.690079  | 1.740346  | -5.212959 |
| 116 | 1 | 0 | 7.272161  | -1.271725 | 1.412301  | 172 | 1 | 0 | -4.479310 | -4.346082 | -3.169090 |
| 117 | 1 | 0 | 6.529309  | 0.972364  | 1.958702  | 173 | 1 | 0 | -2.094747 | -5.521569 | -2.645184 |
| 118 | 1 | 0 | 4.134928  | 0.232832  | 0.261266  | 174 | 1 | 0 | -2.636319 | -5.892077 | -4.287192 |
| 119 | 1 | 0 | 6.180062  | 2.366976  | -0.225590 | 175 | 1 | 0 | -1.187288 | -4.291612 | -5.253767 |
| 120 | 1 | 0 | 6.601995  | 0.208408  | -2.003091 | 176 | 1 | 0 | -0.261340 | -4.439940 | -3.767867 |
| 121 | 1 | 0 | 8.153432  | 1.152948  | 0.437240  | 177 | 1 | 0 | 0.358024  | -1.156784 | -3.349562 |
| 122 | 1 | 0 | 8.432252  | 1.531437  | -1.248651 | 178 | 1 | 0 | 0.947231  | -2.437502 | -0.756666 |
| 123 | 1 | 0 | 2.868582  | -5.368653 | 0.915715  | 179 | 1 | 0 | -0.387121 | -2.039149 | -5.377964 |
| 124 | 1 | 0 | 3.074404  | -4.517214 | 3.211560  | 180 | 1 | 0 | -2.094249 | -2.041032 | -5.771813 |
| 125 | 1 | 0 | 5.463177  | -3.774501 | 3.102592  | 181 | 1 | 0 | 2.073148  | -1.636898 | -1.821666 |
| 126 | 1 | 0 | 6.516139  | -3.596121 | 0.847960  | 182 | 1 | 0 | 0.755770  | 0.549974  | -1.301947 |
| 127 | 1 | 0 | 4.839590  | -2.736469 | -0.903413 | 183 | 1 | 0 | 1.842084  | -0.082501 | -0.091846 |
| 128 | 1 | 0 | 4.870024  | -5.720694 | -0.349473 | 184 | 1 | 0 | -1.121489 | -0.734504 | -0.082278 |
| 129 | 1 | 0 | 5.958114  | -4.832205 | -1.399881 | 185 | 1 | 0 | 0.015491  | -0.991143 | 1.211754  |
| 130 | 1 | 0 | -3.190079 | -5.087795 | 3.296402  | 186 | 1 | 0 | -0.895372 | 1.707094  | 0.129142  |
| 131 | 1 | 0 | -0.903804 | -5.478409 | 4.175039  | 187 | 1 | 0 | -1.447431 | 0.980314  | 1.629786  |
| 132 | 1 | 0 | -0.265890 | -2.872393 | 2.798941  | 188 | 1 | 0 | 1.369022  | 1.966900  | 1.036749  |
| 133 | 1 | 0 | 0.825614  | -5.636447 | 2.285455  | 189 | 1 | 0 | 0.931332  | 1.103184  | 2.494740  |
| 134 | 1 | 0 | -1.072199 | -4.025002 | 0.556233  | 190 | 1 | 0 | -0.520549 | 2.884448  | 3.225880  |
| 135 | 1 | 0 | -0.288422 | -6.943357 | 0.469103  | 191 | 1 | 0 | -0.509607 | 3.640140  | 1.646207  |
| 136 | 1 | 0 | 0.260017  | -5.714292 | -0.674346 | 192 | 1 | 0 | 1.961397  | 3.430467  | 3.411758  |
| 137 | 1 | 0 | -6.855013 | -0.306504 | 1.865996  | 193 | 1 | 0 | 1.832079  | 4.258927  | 1.863590  |
| 138 | 1 | 0 | -6.046610 | -1.675933 | 3.756224  | 194 | 1 | 0 | 0.291125  | 5.001505  | 4.384351  |
| 139 | 1 | 0 | -3.281584 | -0.884676 | 2.854456  | 195 | 1 | 0 | 0.161242  | 5.822066  | 2.840460  |
| 140 | 1 | 0 | -4.670920 | -3.575958 | 2.718900  | 196 | 1 | 0 | 2.700066  | 5.647069  | 4.520527  |
| 141 | 1 | 0 | -3.708184 | -1.644847 | 0.574583  | 197 | 1 | 0 | 2.588290  | 6.388758  | 2.941031  |
| 142 | 1 | 0 | -5.037832 | -2.936388 | -0.991430 | 198 | 1 | 0 | 0.899602  | 8.020121  | 3.858901  |
| 143 | 1 | 0 | -5.425232 | -4.126397 | 0.249808  | 199 | 1 | 0 | 2.489771  | 8.160506  | 4.570389  |
| 144 | 1 | 0 | -4.683854 | 4.988907  | -0.825960 | 200 | 1 | 0 | 1.725038  | 6.831490  | 6.542477  |
| 145 | 1 | 0 | -5.195953 | 4.467957  | 1.522208  | 201 | 1 | 0 | 0.116693  | 6.753860  | 5.862872  |
| 146 | 1 | 0 | -3.343253 | 2.130941  | 1.141812  | 202 | 1 | 0 | 1.567402  | 9.334767  | 6.629739  |
| 147 | 1 | 0 | -6.295661 | 1.966574  | 1.675801  | 203 | 1 | 0 | -0.044583 | 9.256072  | 5.935665  |
| 148 | 1 | 0 | -4.865557 | 1.309661  | -0.890949 | 204 | 1 | 0 | 0.255061  | 8.598031  | 7.537603  |
| 149 | 1 | 0 | -7.063538 | 1.291355  | -1.926088 |     |   |   |           |           |           |
| 150 | 1 | 0 | -7.758911 | 2.096563  | -0.534221 |     |   |   |           |           |           |

(2S,5R)-4b-OOH (excluded)

Center Atomic Atomic Coordinates (Angstroms)  
Number Number Type X Y Z

|    |   |   |           |           |           |
|----|---|---|-----------|-----------|-----------|
| 1  | 6 | 0 | 0.292134  | -3.425266 | 0.154355  |
| 2  | 6 | 0 | -0.120041 | -4.639752 | -0.661773 |
| 3  | 6 | 0 | -0.986701 | -5.528705 | 0.236543  |
| 4  | 6 | 0 | -2.179539 | -4.770433 | 0.813260  |
| 5  | 6 | 0 | -1.814217 | -3.391649 | 1.360481  |
| 6  | 6 | 0 | -1.178725 | -3.289846 | 2.753289  |
| 7  | 6 | 0 | 4.721810  | -1.511834 | -1.946316 |
| 8  | 6 | 0 | 3.965833  | -2.465330 | -2.859007 |
| 9  | 6 | 0 | 2.526035  | -2.535146 | -2.385468 |
| 10 | 6 | 0 | 2.428507  | -2.798905 | -0.885762 |
| 11 | 6 | 0 | 3.323199  | -1.927403 | -0.013483 |
| 12 | 6 | 0 | 3.548740  | -2.486204 | 1.390577  |
| 13 | 6 | 0 | 4.367692  | 3.809823  | -2.159052 |
| 14 | 6 | 0 | 4.119716  | 3.152689  | -3.505340 |
| 15 | 6 | 0 | 3.726235  | 1.701607  | -3.287367 |
| 16 | 6 | 0 | 4.724128  | 0.963674  | -2.419032 |
| 17 | 6 | 0 | 5.000540  | 1.723959  | -1.132489 |
| 18 | 6 | 0 | 6.168681  | 1.191133  | -0.330791 |
| 19 | 6 | 0 | -0.152611 | 4.469282  | -0.568270 |
| 20 | 6 | 0 | 0.497557  | 4.967373  | -1.844546 |
| 21 | 6 | 0 | 1.790673  | 5.693969  | -1.471020 |
| 22 | 6 | 0 | 2.702402  | 4.825605  | -0.605086 |
| 23 | 6 | 0 | 1.980760  | 4.158932  | 0.566045  |
| 24 | 6 | 0 | 1.711665  | 5.055056  | 1.774944  |
| 25 | 6 | 0 | -5.289941 | 3.780437  | -1.364278 |
| 26 | 6 | 0 | -4.490912 | 4.303157  | -2.559308 |
| 27 | 6 | 0 | -3.046490 | 3.851607  | -2.385255 |
| 28 | 6 | 0 | -2.549399 | 4.255729  | -1.009749 |
| 29 | 6 | 0 | -3.430748 | 3.769801  | 0.119100  |
| 30 | 6 | 0 | -3.019203 | 4.293205  | 1.491476  |
| 31 | 6 | 0 | -7.381330 | -1.177292 | -1.102718 |
| 32 | 6 | 0 | -7.411046 | -0.432680 | -2.428021 |
| 33 | 6 | 0 | -6.268692 | 0.568013  | -2.479568 |
| 34 | 6 | 0 | -6.303452 | 1.496450  | -1.282163 |
| 35 | 6 | 0 | -6.224599 | 0.646424  | -0.018192 |
| 36 | 6 | 0 | -6.291262 | 1.388406  | 1.314931  |
| 37 | 6 | 0 | -4.077696 | -5.384897 | -0.682125 |
| 38 | 6 | 0 | -4.422004 | -4.995302 | -2.104728 |
| 39 | 6 | 0 | -4.898903 | -3.556263 | -2.090543 |
| 40 | 6 | 0 | -6.089051 | -3.338319 | -1.173940 |
| 41 | 6 | 0 | -5.853168 | -3.955022 | 0.213816  |
| 42 | 6 | 0 | -7.137353 | -4.279842 | 0.962545  |
| 43 | 8 | 0 | -0.847586 | -4.160813 | -1.818320 |
| 44 | 8 | 0 | -0.218672 | -5.911308 | 1.392631  |
| 45 | 8 | 0 | -3.063043 | -4.474626 | -0.293241 |
| 46 | 8 | 0 | -0.943686 | -2.727842 | 0.402384  |
| 47 | 8 | 0 | 4.101557  | -1.995388 | -4.198960 |
| 48 | 8 | 0 | 1.865418  | -3.617122 | -3.057304 |
| 49 | 8 | 0 | 1.037308  | -2.506542 | -0.604164 |
| 50 | 8 | 0 | 4.662215  | -1.909164 | -0.588911 |
| 51 | 8 | 0 | 3.108458  | 3.844240  | -4.240214 |

|     |   |   |           |           |           |
|-----|---|---|-----------|-----------|-----------|
| 52  | 8 | 0 | 3.669451  | 0.988899  | -4.535226 |
| 53  | 8 | 0 | 4.057927  | -0.260463 | -2.095743 |
| 54  | 8 | 0 | 5.366577  | 3.097440  | -1.453090 |
| 55  | 8 | 0 | 6.356740  | 2.026665  | 0.826705  |
| 56  | 8 | 0 | 0.739094  | 3.838282  | -2.711105 |
| 57  | 8 | 0 | 1.438363  | 6.828101  | -0.652428 |
| 58  | 8 | 0 | 3.129157  | 3.747063  | -1.462582 |
| 59  | 8 | 0 | 0.746928  | 3.576629  | 0.084369  |
| 60  | 8 | 0 | 0.948948  | 4.313268  | 2.749320  |
| 61  | 8 | 0 | -5.078557 | 3.866339  | -3.773669 |
| 62  | 8 | 0 | -2.200321 | 4.501354  | -3.351117 |
| 63  | 8 | 0 | -1.249963 | 3.636041  | -0.843108 |
| 64  | 8 | 0 | -4.755271 | 4.276669  | -0.141037 |
| 65  | 8 | 0 | -1.659045 | 3.854633  | 1.825467  |
| 66  | 8 | 0 | -7.346696 | -1.288997 | -3.569291 |
| 67  | 8 | 0 | -6.386954 | 1.375754  | -3.665983 |
| 68  | 8 | 0 | -5.170449 | 2.364203  | -1.412498 |
| 69  | 8 | 0 | -7.389628 | -0.217085 | -0.054657 |
| 70  | 8 | 0 | -4.987529 | 1.823403  | 1.744260  |
| 71  | 8 | 0 | -3.313397 | -5.123796 | -2.997001 |
| 72  | 8 | 0 | -5.312999 | -3.168227 | -3.417096 |
| 73  | 8 | 0 | -6.157733 | -1.906705 | -1.048619 |
| 74  | 8 | 0 | -5.224661 | -5.261590 | 0.130753  |
| 75  | 8 | 0 | -7.986151 | -3.124257 | 0.895500  |
| 76  | 7 | 0 | -0.857662 | -1.869066 | 2.868291  |
| 77  | 8 | 0 | 2.315582  | -2.720118 | 2.076237  |
| 78  | 6 | 0 | -3.096572 | 1.381001  | 4.239802  |
| 79  | 7 | 0 | -2.262946 | 0.661452  | 3.300753  |
| 80  | 8 | 0 | -2.701952 | 0.204975  | 2.137657  |
| 81  | 6 | 0 | -0.901916 | 1.101616  | 5.163190  |
| 82  | 6 | 0 | -0.901697 | 0.350211  | 3.812327  |
| 83  | 6 | 0 | -2.054663 | 2.130984  | 5.048795  |
| 84  | 6 | 0 | 0.131260  | 0.904403  | 2.814928  |
| 85  | 6 | 0 | 3.504554  | 1.778667  | 4.351577  |
| 86  | 6 | 0 | 4.614904  | 0.999069  | 3.626114  |
| 87  | 6 | 0 | 5.940005  | 1.028778  | 4.427453  |
| 88  | 6 | 0 | 6.784852  | -0.250005 | 4.228765  |
| 89  | 6 | 0 | 7.091354  | -0.547363 | 2.750039  |
| 90  | 6 | 0 | 7.922758  | -1.828453 | 2.551704  |
| 91  | 6 | 0 | 8.072964  | -2.186396 | 1.058354  |
| 92  | 6 | 0 | 8.870300  | -3.487721 | 0.844153  |
| 93  | 6 | 0 | 8.961971  | -3.917958 | -0.635452 |
| 94  | 6 | 0 | 9.821606  | -2.975774 | -1.500776 |
| 95  | 6 | 0 | 9.948115  | -3.469334 | -2.955119 |
| 96  | 6 | 0 | -0.862131 | -1.179933 | 4.016056  |
| 97  | 8 | 0 | -0.957828 | -1.691748 | 5.116878  |
| 98  | 6 | 0 | 10.811629 | -2.525373 | -3.814106 |
| 99  | 6 | 0 | 1.531466  | 0.696962  | 3.356413  |
| 100 | 7 | 0 | 2.212144  | 1.806303  | 3.637567  |
| 101 | 8 | 0 | 1.962821  | -0.445485 | 3.556504  |
| 102 | 8 | 0 | -3.741596 | 0.350894  | 5.039983  |
| 103 | 8 | 0 | -4.575028 | 1.097826  | 5.990547  |
| 104 | 1 | 0 | 0.798367  | -3.679562 | 1.058868  |
| 105 | 1 | 0 | 0.731919  | -5.186389 | -1.032649 |
| 106 | 1 | 0 | -1.338995 | -6.389375 | -0.317629 |
| 107 | 1 | 0 | -2.677232 | -5.369973 | 1.561879  |

|     |   |   |           |           |           |     |   |   |           |           |           |
|-----|---|---|-----------|-----------|-----------|-----|---|---|-----------|-----------|-----------|
| 108 | 1 | 0 | -2.711246 | -2.795444 | 1.358389  | 164 | 1 | 0 | -1.396384 | 3.979937  | -3.492522 |
| 109 | 1 | 0 | -0.311408 | -3.918845 | 2.859841  | 165 | 1 | 0 | -1.344852 | 3.212498  | 1.172916  |
| 110 | 1 | 0 | -1.898072 | -3.557033 | 3.515279  | 166 | 1 | 0 | -6.591858 | -1.912824 | -3.527883 |
| 111 | 1 | 0 | 5.761904  | -1.444887 | -2.220537 | 167 | 1 | 0 | -6.636088 | 0.808776  | -4.411261 |
| 112 | 1 | 0 | 4.405617  | -3.448469 | -2.817114 | 168 | 1 | 0 | -4.362625 | 1.083544  | 1.789509  |
| 113 | 1 | 0 | 2.050191  | -1.586451 | -2.580787 | 169 | 1 | 0 | -2.471553 | -4.848670 | -2.583855 |
| 114 | 1 | 0 | 2.656454  | -3.843817 | -0.719877 | 170 | 1 | 0 | -4.661038 | -3.482036 | -4.061788 |
| 115 | 1 | 0 | 2.914540  | -0.931217 | 0.009675  | 171 | 1 | 0 | -8.624023 | -3.088377 | 1.617082  |
| 116 | 1 | 0 | 4.187365  | -1.805729 | 1.933577  | 172 | 1 | 0 | -0.746062 | -1.412238 | 1.991851  |
| 117 | 1 | 0 | 4.068864  | -3.427893 | 1.290009  | 173 | 1 | 0 | 2.074556  | -1.968302 | 2.653701  |
| 118 | 1 | 0 | 4.711321  | 4.826484  | -2.265947 | 174 | 1 | 0 | -1.744910 | 2.994399  | 4.475707  |
| 119 | 1 | 0 | 5.025400  | 3.193743  | -4.089618 | 175 | 1 | 0 | -2.443125 | 2.432547  | 6.006803  |
| 120 | 1 | 0 | 2.772597  | 1.665771  | -2.783252 | 176 | 1 | 0 | -1.110831 | 0.385638  | 5.940642  |
| 121 | 1 | 0 | 5.629857  | 0.785808  | -2.985068 | 177 | 1 | 0 | 0.049636  | 1.574648  | 5.349759  |
| 122 | 1 | 0 | 4.108342  | 1.724478  | -0.530657 | 178 | 1 | 0 | 3.798190  | 2.810321  | 4.496916  |
| 123 | 1 | 0 | 7.057503  | 1.181904  | -0.951193 | 179 | 1 | 0 | 3.349794  | 1.331830  | 5.327073  |
| 124 | 1 | 0 | 5.955045  | 0.198089  | 0.020253  | 180 | 1 | 0 | 4.786211  | 1.411205  | 2.640907  |
| 125 | 1 | 0 | -0.422785 | 5.296684  | 0.062207  | 181 | 1 | 0 | 4.271405  | -0.017727 | 3.524592  |
| 126 | 1 | 0 | -0.176540 | 5.620817  | -2.372459 | 182 | 1 | 0 | 6.521100  | 1.895547  | 4.130402  |
| 127 | 1 | 0 | 2.326189  | 5.982647  | -2.365771 | 183 | 1 | 0 | 5.724689  | 1.129936  | 5.488564  |
| 128 | 1 | 0 | 3.544266  | 5.407386  | -0.254394 | 184 | 1 | 0 | 7.716739  | -0.151451 | 4.778772  |
| 129 | 1 | 0 | 2.567449  | 3.314118  | 0.886442  | 185 | 1 | 0 | 6.246347  | -1.092313 | 4.655047  |
| 130 | 1 | 0 | 1.214460  | 5.966996  | 1.490660  | 186 | 1 | 0 | 6.155343  | -0.669425 | 2.220437  |
| 131 | 1 | 0 | 2.651906  | 5.311992  | 2.239649  | 187 | 1 | 0 | 7.590329  | 0.303028  | 2.301322  |
| 132 | 1 | 0 | -6.320352 | 4.091950  | -1.411565 | 188 | 1 | 0 | 8.905938  | -1.703316 | 2.997540  |
| 133 | 1 | 0 | -4.517442 | 5.382352  | -2.553991 | 189 | 1 | 0 | 7.437421  | -2.653630 | 3.066699  |
| 134 | 1 | 0 | -3.003808 | 2.777017  | -2.474434 | 190 | 1 | 0 | 7.085653  | -2.293421 | 0.616865  |
| 135 | 1 | 0 | -2.464888 | 5.334923  | -0.984057 | 191 | 1 | 0 | 8.568896  | -1.363897 | 0.552460  |
| 136 | 1 | 0 | -3.449487 | 2.697540  | 0.134443  | 192 | 1 | 0 | 9.872902  | -3.369489 | 1.246540  |
| 137 | 1 | 0 | -3.715619 | 3.906743  | 2.212484  | 193 | 1 | 0 | 8.390951  | -4.281908 | 1.409963  |
| 138 | 1 | 0 | -3.035638 | 5.372060  | 1.500634  | 194 | 1 | 0 | 9.388025  | -4.916257 | -0.686855 |
| 139 | 1 | 0 | -8.224707 | -1.819096 | -0.954792 | 195 | 1 | 0 | 7.960085  | -3.976445 | -1.052504 |
| 140 | 1 | 0 | -8.343494 | 0.107275  | -2.495042 | 196 | 1 | 0 | 9.391343  | -1.979746 | -1.504093 |
| 141 | 1 | 0 | -5.328301 | 0.035572  | -2.478735 | 197 | 1 | 0 | 10.813462 | -2.896713 | -1.063498 |
| 142 | 1 | 0 | -7.224658 | 2.065556  | -1.286179 | 198 | 1 | 0 | 10.385580 | -4.463031 | -2.958323 |
| 143 | 1 | 0 | -5.330442 | 0.043512  | -0.048292 | 199 | 1 | 0 | 8.958008  | -3.553159 | -3.392966 |
| 144 | 1 | 0 | -6.734276 | 0.709238  | 2.030469  | 200 | 1 | 0 | 10.890062 | -2.887176 | -4.833374 |
| 145 | 1 | 0 | -6.901407 | 2.274350  | 1.246238  | 201 | 1 | 0 | 11.813127 | -2.446347 | -3.404223 |
| 146 | 1 | 0 | -3.752120 | -6.409597 | -0.602455 | 202 | 1 | 0 | 10.378271 | -1.530930 | -3.841217 |
| 147 | 1 | 0 | -5.207527 | -5.638569 | -2.469934 | 203 | 1 | 0 | 0.045298  | 0.403148  | 1.860883  |
| 148 | 1 | 0 | -4.097997 | -2.923201 | -1.747485 | 204 | 1 | 0 | -0.075015 | 1.948491  | 2.660814  |
| 149 | 1 | 0 | -6.978909 | -3.737434 | -1.640627 | 205 | 1 | 0 | 1.795082  | 2.701796  | 3.432185  |
| 150 | 1 | 0 | -5.233332 | -3.268129 | 0.765297  | 206 | 1 | 0 | -3.846496 | 1.958375  | 3.738617  |
| 151 | 1 | 0 | -6.890784 | -4.550803 | 1.980744  | 207 | 1 | 0 | -4.559710 | 0.481449  | 6.740761  |
| 152 | 1 | 0 | -7.596459 | -5.131736 | 0.479775  |     |   |   |           |           |           |
| 153 | 1 | 0 | -1.291495 | -3.344769 | -1.530303 |     |   |   |           |           |           |
| 154 | 1 | 0 | 0.478488  | -6.546730 | 1.184366  |     |   |   |           |           |           |
| 155 | 1 | 0 | 3.799792  | -1.073521 | -4.280008 |     |   |   |           |           |           |
| 156 | 1 | 0 | 0.909330  | -3.589209 | -2.893213 |     |   |   |           |           |           |
| 157 | 1 | 0 | 2.259461  | 3.851619  | -3.754219 |     |   |   |           |           |           |
| 158 | 1 | 0 | 3.161346  | 1.495115  | -5.185710 |     |   |   |           |           |           |
| 159 | 1 | 0 | 6.450371  | 2.939862  | 0.520429  |     |   |   |           |           |           |
| 160 | 1 | 0 | 0.904633  | 3.064896  | -2.149441 |     |   |   |           |           |           |
| 161 | 1 | 0 | 1.170455  | 7.593172  | -1.177804 |     |   |   |           |           |           |
| 162 | 1 | 0 | -0.001374 | 4.283447  | 2.517878  |     |   |   |           |           |           |
| 163 | 1 | 0 | -5.405535 | 2.946692  | -3.723267 |     |   |   |           |           |           |

  

| <b>(2S,5R)-4b-OOH (included)</b> |        |        |                         |          |           |  |  |  |  |  |  |
|----------------------------------|--------|--------|-------------------------|----------|-----------|--|--|--|--|--|--|
| Center                           | Atomic | Atomic | Coordinates (Angstroms) |          |           |  |  |  |  |  |  |
| Number                           | Number | Type   | X                       | Y        | Z         |  |  |  |  |  |  |
| -----                            |        |        |                         |          |           |  |  |  |  |  |  |
| 1                                | 6      | 0      | -0.890743               | 2.367311 | -2.833242 |  |  |  |  |  |  |
| 2                                | 6      | 0      | -0.788908               | 3.886094 | -2.791421 |  |  |  |  |  |  |
| 3                                | 6      | 0      | -2.113706               | 4.496585 | -3.237771 |  |  |  |  |  |  |
| 4                                | 6      | 0      | -3.265497               | 3.931963 | -2.426913 |  |  |  |  |  |  |
| 5                                | 6      | 0      | -3.267349               | 2.412583 | -2.383804 |  |  |  |  |  |  |
| 6                                | 6      | 0      | -3.812001               | 1.690967 | -3.621109 |  |  |  |  |  |  |

|    |   |   |           |           |           |     |   |   |           |           |           |
|----|---|---|-----------|-----------|-----------|-----|---|---|-----------|-----------|-----------|
| 7  | 6 | 0 | 4.311640  | 1.244312  | -3.231275 | 63  | 8 | 0 | 0.845922  | -3.529324 | 1.919294  |
| 8  | 6 | 0 | 3.807905  | 2.655897  | -3.033019 | 64  | 8 | 0 | -1.807807 | -3.653810 | 4.409026  |
| 9  | 6 | 0 | 2.500914  | 2.610579  | -2.277594 | 65  | 8 | 0 | -3.210918 | -4.860770 | 2.494485  |
| 10 | 6 | 0 | 1.478467  | 1.846258  | -3.096110 | 66  | 8 | 0 | -3.101562 | 3.158796  | 5.359712  |
| 11 | 6 | 0 | 1.983947  | 0.434574  | -3.385336 | 67  | 8 | 0 | -1.667407 | 0.860474  | 6.146881  |
| 12 | 6 | 0 | 1.165009  | -0.276759 | -4.472437 | 68  | 8 | 0 | -1.834520 | -1.328492 | 4.311391  |
| 13 | 6 | 0 | 5.771539  | -3.135059 | -0.938448 | 69  | 8 | 0 | -4.985226 | 0.459199  | 3.803242  |
| 14 | 6 | 0 | 6.572788  | -1.986772 | -0.302443 | 70  | 8 | 0 | -3.704710 | -2.273478 | 1.877578  |
| 15 | 6 | 0 | 5.794579  | -0.688565 | -0.455056 | 71  | 8 | 0 | -2.844308 | 6.408027  | 0.753309  |
| 16 | 6 | 0 | 5.641386  | -0.300633 | -1.913858 | 72  | 8 | 0 | -3.197078 | 5.041830  | 3.176687  |
| 17 | 6 | 0 | 5.377739  | -1.560906 | -2.771187 | 73  | 8 | 0 | -3.865381 | 2.292700  | 2.923231  |
| 18 | 6 | 0 | 6.636275  | -1.970101 | -3.543429 | 74  | 8 | 0 | -5.136531 | 3.740448  | -0.186976 |
| 19 | 6 | 0 | 1.797359  | -4.439559 | 1.408946  | 75  | 8 | 0 | -5.545175 | 0.779694  | -0.507369 |
| 20 | 6 | 0 | 3.110817  | -4.420708 | 2.179556  | 76  | 7 | 0 | -4.220367 | 0.367838  | -3.158775 |
| 21 | 6 | 0 | 4.110237  | -5.320853 | 1.451261  | 77  | 8 | 0 | -0.220721 | 0.048236  | -4.428733 |
| 22 | 6 | 0 | 4.283236  | -4.896500 | -0.005949 | 78  | 6 | 0 | -6.102225 | -3.485675 | -3.545115 |
| 23 | 6 | 0 | 2.965978  | -4.685048 | -0.741825 | 79  | 7 | 0 | -5.655132 | -2.260672 | -2.935058 |
| 24 | 6 | 0 | 2.276037  | -5.957884 | -1.223310 | 80  | 8 | 0 | -6.483401 | -1.474556 | -2.255481 |
| 25 | 6 | 0 | -1.517871 | -2.446174 | 5.110010  | 81  | 6 | 0 | -3.711492 | -3.291405 | -3.749732 |
| 26 | 6 | 0 | -0.028256 | -2.409603 | 5.371288  | 82  | 6 | 0 | -4.185871 | -2.040301 | -2.986919 |
| 27 | 6 | 0 | 0.742529  | -2.478730 | 4.067834  | 83  | 6 | 0 | -4.835814 | -4.334446 | -3.544446 |
| 28 | 6 | 0 | 0.309078  | -3.687104 | 3.250587  | 84  | 6 | 0 | -3.677170 | -1.953401 | -1.547230 |
| 29 | 6 | 0 | -1.197338 | -3.690553 | 3.085893  | 85  | 6 | 0 | -3.895260 | -0.765030 | -3.800124 |
| 30 | 6 | 0 | -1.761553 | -4.935182 | 2.432790  | 86  | 8 | 0 | -3.431815 | -0.801561 | -4.925244 |
| 31 | 6 | 0 | -4.561580 | 1.800699  | 4.044848  | 87  | 6 | 0 | -0.565726 | -0.512235 | 0.062568  |
| 32 | 6 | 0 | -3.593378 | 1.814753  | 5.212311  | 88  | 6 | 0 | -0.823509 | 0.535727  | 1.167385  |
| 33 | 6 | 0 | -2.442826 | 0.869416  | 4.946180  | 89  | 6 | 0 | 0.150135  | 1.730518  | 1.137246  |
| 34 | 6 | 0 | -2.979173 | -0.509544 | 4.605818  | 90  | 6 | 0 | 1.626479  | 1.384342  | 1.412059  |
| 35 | 6 | 0 | -3.898280 | -0.423832 | 3.395142  | 91  | 6 | 0 | 2.498826  | 2.657991  | 1.416478  |
| 36 | 6 | 0 | -4.526756 | -1.729930 | 2.931316  | 92  | 6 | 0 | 4.004498  | 2.379103  | 1.589560  |
| 37 | 6 | 0 | -4.237728 | 4.832082  | -0.382741 | 93  | 6 | 0 | 4.849903  | 3.645613  | 1.342026  |
| 38 | 6 | 0 | -3.865018 | 5.434303  | 0.961892  | 94  | 6 | 0 | 6.344144  | 3.416271  | 1.639550  |
| 39 | 6 | 0 | -3.397609 | 4.369263  | 1.931090  | 95  | 6 | 0 | 7.234541  | 4.622329  | 1.273548  |
| 40 | 6 | 0 | -4.445017 | 3.282144  | 2.054046  | 96  | 6 | 0 | -2.233233 | -1.487975 | -1.460435 |
| 41 | 6 | 0 | -4.694155 | 2.668374  | 0.689392  | 97  | 8 | 0 | -1.530538 | -1.375289 | -2.467357 |
| 42 | 6 | 0 | -5.778492 | 1.607446  | 0.660341  | 98  | 7 | 0 | -1.823606 | -1.230114 | -0.220086 |
| 43 | 8 | 0 | -0.429176 | 4.345080  | -1.480381 | 99  | 6 | 0 | 6.990110  | 5.857506  | 2.163454  |
| 44 | 8 | 0 | -2.415028 | 4.077623  | -4.582353 | 100 | 6 | 0 | 7.976534  | 7.013288  | 1.891114  |
| 45 | 8 | 0 | -3.068904 | 4.410272  | -1.059790 | 101 | 6 | 0 | 7.784394  | 7.657300  | 0.503352  |
| 46 | 8 | 0 | -1.955916 | 1.942617  | -1.983873 | 102 | 8 | 0 | -6.501087 | -3.146414 | -4.899729 |
| 47 | 8 | 0 | 4.778400  | 3.426136  | -2.327151 | 103 | 8 | 0 | -6.991715 | -4.416257 | -5.454215 |
| 48 | 8 | 0 | 2.152589  | 3.984219  | -2.065104 | 104 | 1 | 0 | -1.035674 | 2.021675  | -3.836213 |
| 49 | 8 | 0 | 0.279624  | 1.768751  | -2.291411 | 105 | 1 | 0 | 0.002628  | 4.213698  | -3.447763 |
| 50 | 8 | 0 | 3.327988  | 0.511211  | -3.959983 | 106 | 1 | 0 | -2.081275 | 5.572498  | -3.132565 |
| 51 | 8 | 0 | 6.809752  | -2.210491 | 1.095594  | 107 | 1 | 0 | -4.204025 | 4.299921  | -2.814933 |
| 52 | 8 | 0 | 6.526904  | 0.341717  | 0.217712  | 108 | 1 | 0 | -3.917004 | 2.140029  | -1.582359 |
| 53 | 8 | 0 | 4.553822  | 0.639698  | -1.972466 | 109 | 1 | 0 | -3.088616 | 1.572915  | -4.406724 |
| 54 | 8 | 0 | 4.897986  | -2.642240 | -1.939961 | 110 | 1 | 0 | -4.657654 | 2.239919  | -4.017766 |
| 55 | 8 | 0 | 6.492436  | -3.355848 | -3.897123 | 111 | 1 | 0 | 5.204278  | 1.237170  | -3.838014 |
| 56 | 8 | 0 | 3.586847  | -3.067602 | 2.286988  | 112 | 1 | 0 | 3.622752  | 3.073668  | -4.016218 |
| 57 | 8 | 0 | 3.566556  | -6.656566 | 1.439700  | 113 | 1 | 0 | 2.654290  | 2.096848  | -1.343632 |
| 58 | 8 | 0 | 4.971012  | -3.633390 | 0.118108  | 114 | 1 | 0 | 1.289552  | 2.362063  | -4.028148 |
| 59 | 8 | 0 | 2.045283  | -3.931900 | 0.103415  | 115 | 1 | 0 | 2.015460  | -0.115181 | -2.457603 |
| 60 | 8 | 0 | 0.989645  | -5.612668 | -1.765572 | 116 | 1 | 0 | 1.340651  | -1.344726 | -4.417620 |
| 61 | 8 | 0 | 0.277947  | -1.175863 | 6.043226  | 117 | 1 | 0 | 1.545688  | 0.080716  | -5.416741 |
| 62 | 8 | 0 | 2.115314  | -2.535236 | 4.470203  | 118 | 1 | 0 | 6.391639  | -3.916060 | -1.347861 |

|     |   |   |           |           |           |     |   |   |           |           |           |
|-----|---|---|-----------|-----------|-----------|-----|---|---|-----------|-----------|-----------|
| 119 | 1 | 0 | 7.543109  | -1.881723 | -0.758634 | 175 | 1 | 0 | -4.870855 | -5.075964 | -4.324632 |
| 120 | 1 | 0 | 4.802488  | -0.809855 | -0.043353 | 176 | 1 | 0 | -3.625035 | -3.030703 | -4.791737 |
| 121 | 1 | 0 | 6.552222  | 0.193236  | -2.228968 | 177 | 1 | 0 | -2.748583 | -3.615718 | -3.389583 |
| 122 | 1 | 0 | 4.571808  | -1.370934 | -3.454367 | 178 | 1 | 0 | -2.444217 | -1.436345 | 0.542809  |
| 123 | 1 | 0 | 7.530215  | -1.825598 | -2.947348 | 179 | 1 | 0 | -0.277507 | -0.010156 | -0.845173 |
| 124 | 1 | 0 | 6.716668  | -1.329057 | -4.414514 | 180 | 1 | 0 | 0.200963  | -1.218413 | 0.358089  |
| 125 | 1 | 0 | 1.410040  | -5.445636 | 1.382447  | 181 | 1 | 0 | -1.818445 | 0.930334  | 1.000172  |
| 126 | 1 | 0 | 2.971249  | -4.768667 | 3.190032  | 182 | 1 | 0 | -0.817325 | 0.059710  | 2.143430  |
| 127 | 1 | 0 | 5.074965  | -5.272423 | 1.935001  | 183 | 1 | 0 | 0.069545  | 2.205339  | 0.168428  |
| 128 | 1 | 0 | 4.900081  | -5.613991 | -0.531209 | 184 | 1 | 0 | -0.173612 | 2.450864  | 1.885851  |
| 129 | 1 | 0 | 3.146254  | -4.029377 | -1.574091 | 185 | 1 | 0 | 1.992766  | 0.706974  | 0.646047  |
| 130 | 1 | 0 | 2.186499  | -6.677102 | -0.426022 | 186 | 1 | 0 | 1.717434  | 0.874946  | 2.369310  |
| 131 | 1 | 0 | 2.860699  | -6.397001 | -2.018434 | 187 | 1 | 0 | 2.163102  | 3.314943  | 2.214840  |
| 132 | 1 | 0 | -2.089780 | -2.460406 | 6.023519  | 188 | 1 | 0 | 2.345005  | 3.191429  | 0.485606  |
| 133 | 1 | 0 | 0.244055  | -3.257196 | 5.984134  | 189 | 1 | 0 | 4.188626  | 2.002231  | 2.593516  |
| 134 | 1 | 0 | 0.527993  | -1.593335 | 3.489367  | 190 | 1 | 0 | 4.330108  | 1.622514  | 0.885672  |
| 135 | 1 | 0 | 0.653495  | -4.597489 | 3.726779  | 191 | 1 | 0 | 4.462682  | 4.464661  | 1.939878  |
| 136 | 1 | 0 | -1.503764 | -2.819849 | 2.540497  | 192 | 1 | 0 | 4.747368  | 3.909373  | 0.295583  |
| 137 | 1 | 0 | -1.419105 | -5.826338 | 2.942805  | 193 | 1 | 0 | 6.472261  | 3.184074  | 2.695053  |
| 138 | 1 | 0 | -1.490665 | -4.975034 | 1.391962  | 194 | 1 | 0 | 6.661604  | 2.553992  | 1.067581  |
| 139 | 1 | 0 | -5.448345 | 2.377887  | 4.249457  | 195 | 1 | 0 | 7.067068  | 4.872383  | 0.231446  |
| 140 | 1 | 0 | -4.107241 | 1.493334  | 6.107501  | 196 | 1 | 0 | 8.278009  | 4.331551  | 1.369813  |
| 141 | 1 | 0 | -1.877295 | 1.238223  | 4.103002  | 197 | 1 | 0 | -4.284471 | -1.271884 | -0.970407 |
| 142 | 1 | 0 | -3.522677 | -0.910873 | 5.453165  | 198 | 1 | 0 | -3.764585 | -2.928977 | -1.081512 |
| 143 | 1 | 0 | -3.374692 | 0.012545  | 2.565584  | 199 | 1 | 0 | 7.082206  | 5.554974  | 3.203456  |
| 144 | 1 | 0 | -5.516766 | -1.508771 | 2.561291  | 200 | 1 | 0 | 5.977371  | 6.220612  | 2.024065  |
| 145 | 1 | 0 | -4.614109 | -2.429953 | 3.753796  | 201 | 1 | 0 | 7.844001  | 7.776816  | 2.652031  |
| 146 | 1 | 0 | -4.777392 | 5.542054  | -0.987669 | 202 | 1 | 0 | 8.993986  | 6.644275  | 1.982704  |
| 147 | 1 | 0 | -4.761097 | 5.879712  | 1.378027  | 203 | 1 | 0 | 6.767094  | 8.018418  | 0.392384  |
| 148 | 1 | 0 | -2.482871 | 3.921766  | 1.565602  | 204 | 1 | 0 | 7.979546  | 6.946348  | -0.289975 |
| 149 | 1 | 0 | -5.354832 | 3.684721  | 2.482908  | 205 | 1 | 0 | 8.457377  | 8.498309  | 0.372560  |
| 150 | 1 | 0 | -3.769386 | 2.240008  | 0.340347  | 206 | 1 | 0 | -6.947713 | -3.896955 | -3.025324 |
| 151 | 1 | 0 | -6.735171 | 2.107611  | 0.598285  | 207 | 1 | 0 | -6.906109 | -4.222056 | -6.401414 |
| 152 | 1 | 0 | -5.730849 | 1.009317  | 1.556142  |     |   |   |           |           |           |
| 153 | 1 | 0 | -1.218541 | 4.412989  | -0.915073 |     |   |   |           |           |           |
| 154 | 1 | 0 | -1.808131 | 4.458670  | -5.229759 |     |   |   |           |           |           |
| 155 | 1 | 0 | 4.317232  | 4.206246  | -1.983221 |     |   |   |           |           |           |
| 156 | 1 | 0 | 1.305000  | 4.103513  | -1.588372 |     |   |   |           |           |           |
| 157 | 1 | 0 | 6.036202  | -2.662912 | 1.466543  |     |   |   |           |           |           |
| 158 | 1 | 0 | 6.798125  | 0.000609  | 1.083344  |     |   |   |           |           |           |
| 159 | 1 | 0 | 7.126639  | -3.605258 | -4.581509 |     |   |   |           |           |           |
| 160 | 1 | 0 | 3.564000  | -2.661357 | 1.407513  |     |   |   |           |           |           |
| 161 | 1 | 0 | 3.894994  | -7.194480 | 2.170728  |     |   |   |           |           |           |
| 162 | 1 | 0 | 0.667712  | -4.814537 | -1.321707 |     |   |   |           |           |           |
| 163 | 1 | 0 | 1.240256  | -1.058497 | 6.038691  |     |   |   |           |           |           |
| 164 | 1 | 0 | 2.723928  | -2.483531 | 3.704949  |     |   |   |           |           |           |
| 165 | 1 | 0 | -3.456885 | -4.839273 | 3.431412  |     |   |   |           |           |           |
| 166 | 1 | 0 | -2.366160 | 3.146155  | 5.991032  |     |   |   |           |           |           |
| 167 | 1 | 0 | -0.917139 | 0.234566  | 6.089774  |     |   |   |           |           |           |
| 168 | 1 | 0 | -3.650227 | -3.248388 | 1.932366  |     |   |   |           |           |           |
| 169 | 1 | 0 | -2.503638 | 6.675646  | 1.619979  |     |   |   |           |           |           |
| 170 | 1 | 0 | -3.054161 | 4.406626  | 3.905926  |     |   |   |           |           |           |
| 171 | 1 | 0 | -6.299491 | 0.222269  | -0.742651 |     |   |   |           |           |           |
| 172 | 1 | 0 | -4.706406 | 0.341241  | -2.287976 |     |   |   |           |           |           |
| 173 | 1 | 0 | -0.710438 | -0.470070 | -3.761099 |     |   |   |           |           |           |
| 174 | 1 | 0 | -4.741066 | -4.822983 | -2.582619 |     |   |   |           |           |           |

  

**(2R,5R)-4b-OOH (excluded)**

| Center Number | Atomic Number | Atomic Type | Coordinates (Angstroms) |           |           |
|---------------|---------------|-------------|-------------------------|-----------|-----------|
|               |               |             | X                       | Y         | Z         |
| 1             | 6             | 0           | 0.226465                | -3.428874 | 0.280527  |
| 2             | 6             | 0           | -0.144875               | -4.678809 | -0.501435 |
| 3             | 6             | 0           | -1.041766               | -5.538680 | 0.393529  |
| 4             | 6             | 0           | -2.262701               | -4.767203 | 0.884817  |
| 5             | 6             | 0           | -1.930778               | -3.363290 | 1.390925  |
| 6             | 6             | 0           | -1.370492               | -3.207291 | 2.807043  |
| 7             | 6             | 0           | 4.747130                | -1.655553 | -1.729315 |
| 8             | 6             | 0           | 4.024297                | -2.661189 | -2.611799 |
| 9             | 6             | 0           | 2.563451                | -2.687301 | -2.203313 |
| 10            | 6             | 0           | 2.397040                | -2.850976 | -0.695797 |
| 11            | 6             | 0           | 3.254541                | -1.927755 | 0.158587  |
| 12            | 6             | 0           | 3.404433                | -2.392952 | 1.606251  |
| 13            | 6             | 0           | 4.529604                | 3.639859  | -2.405232 |
| 14            | 6             | 0           | 4.288145                | 2.866547  | -3.690470 |
| 15            | 6             | 0           | 3.848478                | 1.452014  | -3.352942 |
| 16            | 6             | 0           | 4.803313                | 0.771885  | -2.395123 |

|    |   |   |           |           |           |     |   |   |           |           |           |
|----|---|---|-----------|-----------|-----------|-----|---|---|-----------|-----------|-----------|
| 17 | 6 | 0 | 5.043446  | 1.635714  | -1.169617 | 73  | 8 | 0 | -6.104007 | -1.967987 | -1.120778 |
| 18 | 6 | 0 | 6.142072  | 1.137315  | -0.257375 | 74  | 8 | 0 | -5.258435 | -5.336869 | 0.072346  |
| 19 | 6 | 0 | 0.043830  | 4.475492  | -0.805363 | 75  | 8 | 0 | -8.039123 | -3.189301 | 0.722907  |
| 20 | 6 | 0 | 0.662897  | 4.937729  | -2.109958 | 76  | 7 | 0 | -1.089455 | -1.776744 | 2.912499  |
| 21 | 6 | 0 | 1.971386  | 5.661411  | -1.782779 | 77  | 8 | 0 | 2.132401  | -2.553927 | 2.242330  |
| 22 | 6 | 0 | 2.896580  | 4.804197  | -0.919903 | 78  | 6 | 0 | -3.390838 | 1.232224  | 4.513634  |
| 23 | 6 | 0 | 2.204788  | 4.186211  | 0.294175  | 79  | 7 | 0 | -2.487981 | 0.748161  | 3.468201  |
| 24 | 6 | 0 | 1.984755  | 5.119153  | 1.485385  | 80  | 8 | 0 | -2.838091 | 0.677177  | 2.197599  |
| 25 | 6 | 0 | -5.148462 | 3.730387  | -1.165968 | 81  | 6 | 0 | -1.090326 | 1.099471  | 5.304014  |
| 26 | 6 | 0 | -4.452938 | 4.304049  | -2.403666 | 82  | 6 | 0 | -1.109342 | 0.426431  | 3.922639  |
| 27 | 6 | 0 | -3.002182 | 3.840656  | -2.371140 | 83  | 6 | 0 | -2.560286 | 1.030431  | 5.782152  |
| 28 | 6 | 0 | -2.383903 | 4.217769  | -1.037477 | 84  | 6 | 0 | -0.086925 | 1.009418  | 2.939105  |
| 29 | 6 | 0 | -3.159778 | 3.684900  | 0.152793  | 85  | 6 | 0 | 3.346091  | 1.848405  | 4.362610  |
| 30 | 6 | 0 | -2.645853 | 4.190677  | 1.497930  | 86  | 6 | 0 | 4.445349  | 1.008420  | 3.691684  |
| 31 | 6 | 0 | -7.311218 | -1.223103 | -1.236999 | 87  | 6 | 0 | 5.755278  | 1.050198  | 4.515993  |
| 32 | 6 | 0 | -7.238209 | -0.430199 | -2.529834 | 88  | 6 | 0 | 6.614189  | -0.222871 | 4.350114  |
| 33 | 6 | 0 | -6.079976 | 0.552508  | -2.462517 | 89  | 6 | 0 | 6.958504  | -0.533901 | 2.882921  |
| 34 | 6 | 0 | -6.201488 | 1.460033  | -1.251209 | 90  | 6 | 0 | 7.824449  | -1.797618 | 2.723370  |
| 35 | 6 | 0 | -6.243807 | 0.574576  | -0.007426 | 91  | 6 | 0 | 8.001433  | -2.185789 | 1.240845  |
| 36 | 6 | 0 | -6.506914 | 1.264366  | 1.324835  | 92  | 6 | 0 | 8.835677  | -3.469495 | 1.064995  |
| 37 | 6 | 0 | -4.076601 | -5.450468 | -0.691227 | 93  | 6 | 0 | 8.950392  | -3.933837 | -0.402672 |
| 38 | 6 | 0 | -4.367689 | -5.072266 | -2.128917 | 94  | 6 | 0 | 9.786569  | -2.988057 | -1.286881 |
| 39 | 6 | 0 | -4.836592 | -3.630456 | -2.137649 | 95  | 6 | 0 | 9.938275  | -3.514726 | -2.727144 |
| 40 | 6 | 0 | -6.054085 | -3.400099 | -1.261606 | 96  | 6 | 0 | -1.099308 | -1.106055 | 4.070867  |
| 41 | 6 | 0 | -5.893185 | -4.033127 | 0.129754  | 97  | 8 | 0 | -1.250821 | -1.643152 | 5.156563  |
| 42 | 6 | 0 | -7.218705 | -4.364686 | 0.797381  | 98  | 6 | 0 | 10.778558 | -2.567047 | -3.604857 |
| 43 | 8 | 0 | -0.825073 | -4.249608 | -1.705984 | 99  | 6 | 0 | 1.309224  | 0.801707  | 3.497049  |
| 44 | 8 | 0 | -0.320865 | -5.863953 | 1.596589  | 100 | 7 | 0 | 2.065147  | 1.882746  | 3.631927  |
| 45 | 8 | 0 | -3.095710 | -4.518686 | -0.269885 | 101 | 8 | 0 | 1.668916  | -0.337121 | 3.837191  |
| 46 | 8 | 0 | -1.019806 | -2.727239 | 0.453583  | 102 | 8 | 0 | -3.687427 | 2.623390  | 4.272403  |
| 47 | 8 | 0 | 4.229119  | -2.284906 | -3.971867 | 103 | 8 | 0 | -5.144375 | 2.784707  | 4.325640  |
| 48 | 8 | 0 | 1.924834  | -3.808577 | -2.831048 | 104 | 1 | 0 | 0.697956  | -3.641111 | 1.214152  |
| 49 | 8 | 0 | 0.996449  | -2.542841 | -0.490763 | 105 | 1 | 0 | 0.725712  | -5.231103 | -0.815508 |
| 50 | 8 | 0 | 4.619266  | -1.961429 | -0.352297 | 106 | 1 | 0 | -1.362699 | -6.425568 | -0.137748 |
| 51 | 8 | 0 | 3.303998  | 3.510270  | -4.503122 | 107 | 1 | 0 | -2.791204 | -5.338880 | 1.634106  |
| 52 | 8 | 0 | 3.801196  | 0.634771  | -4.535404 | 108 | 1 | 0 | -2.833758 | -2.780081 | 1.320703  |
| 53 | 8 | 0 | 4.106737  | -0.410044 | -1.989026 | 109 | 1 | 0 | -0.494453 | -3.810874 | 2.974059  |
| 54 | 8 | 0 | 5.471643  | 2.961926  | -1.593298 | 110 | 1 | 0 | -2.118687 | -3.475979 | 3.539710  |
| 55 | 8 | 0 | 6.262372  | 2.035517  | 0.862214  | 111 | 1 | 0 | 5.799754  | -1.616444 | -1.956727 |
| 56 | 8 | 0 | 0.868580  | 3.796936  | -2.967705 | 112 | 1 | 0 | 4.449740  | -3.643081 | -2.482492 |
| 57 | 8 | 0 | 1.651340  | 6.817008  | -0.981810 | 113 | 1 | 0 | 2.106439  | -1.750787 | -2.484024 |
| 58 | 8 | 0 | 3.265123  | 3.692774  | -1.763344 | 114 | 1 | 0 | 2.615830  | -3.882838 | -0.452861 |
| 59 | 8 | 0 | 0.956467  | 3.599909  | -0.144530 | 115 | 1 | 0 | 2.857379  | -0.928915 | 0.094625  |
| 60 | 8 | 0 | 1.260572  | 4.416718  | 2.512762  | 116 | 1 | 0 | 4.031289  | -1.688547 | 2.130287  |
| 61 | 8 | 0 | -5.152437 | 3.947625  | -3.581251 | 117 | 1 | 0 | 3.911484  | -3.347481 | 1.594428  |
| 62 | 8 | 0 | -2.234966 | 4.500087  | -3.394350 | 118 | 1 | 0 | 4.921184  | 4.626582  | -2.595249 |
| 63 | 8 | 0 | -1.060263 | 3.633675  | -1.032286 | 119 | 1 | 0 | 5.201898  | 2.829525  | -4.262313 |
| 64 | 8 | 0 | -4.503306 | 4.185857  | 0.015806  | 120 | 1 | 0 | 2.881649  | 1.487049  | -2.874062 |
| 65 | 8 | 0 | -1.221574 | 3.886487  | 1.640717  | 121 | 1 | 0 | 5.725372  | 0.533363  | -2.910123 |
| 66 | 8 | 0 | -7.104720 | -1.236851 | -3.700276 | 122 | 1 | 0 | 4.122119  | 1.715459  | -0.619194 |
| 67 | 8 | 0 | -6.095251 | 1.369224  | -3.646786 | 123 | 1 | 0 | 7.071958  | 1.076229  | -0.810837 |
| 68 | 8 | 0 | -5.047341 | 2.309608  | -1.253951 | 124 | 1 | 0 | 5.884420  | 0.171501  | 0.136841  |
| 69 | 8 | 0 | -7.390497 | -0.297531 | -0.163149 | 125 | 1 | 0 | -0.211598 | 5.319844  | -0.192783 |
| 70 | 8 | 0 | -5.350829 | 1.955162  | 1.840572  | 126 | 1 | 0 | -0.021763 | 5.593112  | -2.623502 |
| 71 | 8 | 0 | -3.228515 | -5.209100 | -2.979855 | 127 | 1 | 0 | 2.488940  | 5.925840  | -2.695525 |
| 72 | 8 | 0 | -5.207155 | -3.243713 | -3.477594 | 128 | 1 | 0 | 3.763468  | 5.377061  | -0.619638 |



|     |   |   |           |           |           |     |   |   |           |           |           |
|-----|---|---|-----------|-----------|-----------|-----|---|---|-----------|-----------|-----------|
| 129 | 1 | 0 | 2.792485  | 3.345850  | 0.624050  | 185 | 1 | 0 | 6.074210  | -1.065765 | 4.773462  |
| 130 | 1 | 0 | 1.478908  | 6.023156  | 1.190940  | 186 | 1 | 0 | 6.037479  | -0.686632 | 2.335400  |
| 131 | 1 | 0 | 2.945566  | 5.388530  | 1.898751  | 187 | 1 | 0 | 7.447471  | 0.321641  | 2.432146  |
| 132 | 1 | 0 | -6.176493 | 4.047757  | -1.112412 | 188 | 1 | 0 | 8.798172  | -1.637417 | 3.178524  |
| 133 | 1 | 0 | -4.470981 | 5.381251  | -2.336245 | 189 | 1 | 0 | 7.353356  | -2.622986 | 3.251171  |
| 134 | 1 | 0 | -2.973644 | 2.767101  | -2.483014 | 190 | 1 | 0 | 7.021328  | -2.328790 | 0.794163  |
| 135 | 1 | 0 | -2.323910 | 5.297470  | -0.984520 | 191 | 1 | 0 | 8.480727  | -1.362093 | 0.720970  |
| 136 | 1 | 0 | -3.154859 | 2.608240  | 0.131696  | 192 | 1 | 0 | 9.831564  | -3.313693 | 1.471183  |
| 137 | 1 | 0 | -3.181436 | 3.727736  | 2.304303  | 193 | 1 | 0 | 8.374079  | -4.262398 | 1.647147  |
| 138 | 1 | 0 | -2.761974 | 5.261760  | 1.546873  | 194 | 1 | 0 | 9.406910  | -4.919601 | -0.426182 |
| 139 | 1 | 0 | -8.170340 | -1.858407 | -1.172236 | 195 | 1 | 0 | 7.953599  | -4.033820 | -0.824193 |
| 140 | 1 | 0 | -8.155428 | 0.128490  | -2.639500 | 196 | 1 | 0 | 9.325907  | -2.006149 | -1.318769 |
| 141 | 1 | 0 | -5.150148 | 0.006471  | -2.394370 | 197 | 1 | 0 | 10.772382 | -2.866921 | -0.845628 |
| 142 | 1 | 0 | -7.110737 | 2.043864  | -1.321536 | 198 | 1 | 0 | 10.406084 | -4.494166 | -2.701758 |
| 143 | 1 | 0 | -5.337921 | -0.010360 | 0.046396  | 199 | 1 | 0 | 8.954364  | -3.640293 | -3.168920 |
| 144 | 1 | 0 | -6.838098 | 0.497374  | 2.011836  | 200 | 1 | 0 | 10.875178 | -2.952457 | -4.613834 |
| 145 | 1 | 0 | -7.288701 | 1.999554  | 1.224535  | 201 | 1 | 0 | 11.774249 | -2.446626 | -3.190929 |
| 146 | 1 | 0 | -3.739638 | -6.469391 | -0.590227 | 202 | 1 | 0 | 10.315114 | -1.587462 | -3.660659 |
| 147 | 1 | 0 | -5.142329 | -5.715148 | -2.517137 | 203 | 1 | 0 | -0.159802 | 0.520267  | 1.977264  |
| 148 | 1 | 0 | -4.043176 | -3.001393 | -1.772580 | 204 | 1 | 0 | -0.318570 | 2.050509  | 2.798442  |
| 149 | 1 | 0 | -6.931902 | -3.776321 | -1.768273 | 205 | 1 | 0 | 1.751590  | 2.780149  | 3.287025  |
| 150 | 1 | 0 | -5.309629 | -3.349947 | 0.723237  | 206 | 1 | 0 | -4.317948 | 0.689653  | 4.501760  |
| 151 | 1 | 0 | -7.032801 | -4.671272 | 1.818340  | 207 | 1 | 0 | -5.358678 | 2.669217  | 3.363393  |
| 152 | 1 | 0 | -7.660899 | -5.194449 | 0.261841  |     |   |   |           |           |           |
| 153 | 1 | 0 | -1.273762 | -3.418778 | -1.473578 |     |   |   |           |           |           |
| 154 | 1 | 0 | 0.378915  | -6.513339 | 1.449028  |     |   |   |           |           |           |
| 155 | 1 | 0 | 3.929836  | -1.372914 | -4.135573 |     |   |   |           |           |           |
| 156 | 1 | 0 | 0.961470  | -3.758732 | -2.726154 |     |   |   |           |           |           |
| 157 | 1 | 0 | 2.469492  | 3.639612  | -4.011269 |     |   |   |           |           |           |
| 158 | 1 | 0 | 3.320032  | 1.095219  | -5.238371 |     |   |   |           |           |           |
| 159 | 1 | 0 | 6.427507  | 2.924295  | 0.516833  |     |   |   |           |           |           |
| 160 | 1 | 0 | 1.029915  | 3.028113  | -2.399499 |     |   |   |           |           |           |
| 161 | 1 | 0 | 1.359191  | 7.566897  | -1.516086 |     |   |   |           |           |           |
| 162 | 1 | 0 | 0.302483  | 4.366939  | 2.304602  |     |   |   |           |           |           |
| 163 | 1 | 0 | -5.367920 | 2.994451  | -3.622340 |     |   |   |           |           |           |
| 164 | 1 | 0 | -1.444419 | 3.978190  | -3.596461 |     |   |   |           |           |           |
| 165 | 1 | 0 | -0.922956 | 3.248155  | 0.978062  |     |   |   |           |           |           |
| 166 | 1 | 0 | -6.391741 | -1.905514 | -3.622624 |     |   |   |           |           |           |
| 167 | 1 | 0 | -6.319253 | 0.813664  | -4.408786 |     |   |   |           |           |           |
| 168 | 1 | 0 | -4.540442 | 1.417814  | 1.824285  |     |   |   |           |           |           |
| 169 | 1 | 0 | -2.399675 | -4.943577 | -2.534982 |     |   |   |           |           |           |
| 170 | 1 | 0 | -4.535809 | -3.559549 | -4.101152 |     |   |   |           |           |           |
| 171 | 1 | 0 | -8.824072 | -3.254573 | 1.279504  |     |   |   |           |           |           |
| 172 | 1 | 0 | -0.885444 | -1.331776 | 2.045815  |     |   |   |           |           |           |
| 173 | 1 | 0 | 1.916845  | -1.816857 | 2.848071  |     |   |   |           |           |           |
| 174 | 1 | 0 | -2.804596 | 1.794119  | 6.502592  |     |   |   |           |           |           |
| 175 | 1 | 0 | -2.742391 | 0.047083  | 6.185573  |     |   |   |           |           |           |
| 176 | 1 | 0 | -0.424798 | 0.580662  | 5.973830  |     |   |   |           |           |           |
| 177 | 1 | 0 | -0.785344 | 2.131708  | 5.193004  |     |   |   |           |           |           |
| 178 | 1 | 0 | 3.666232  | 2.876743  | 4.467246  |     |   |   |           |           |           |
| 179 | 1 | 0 | 3.162425  | 1.447852  | 5.352524  |     |   |   |           |           |           |
| 180 | 1 | 0 | 4.641316  | 1.372376  | 2.691560  |     |   |   |           |           |           |
| 181 | 1 | 0 | 4.079101  | -0.005025 | 3.634227  |     |   |   |           |           |           |
| 182 | 1 | 0 | 6.335451  | 1.918514  | 4.221092  |     |   |   |           |           |           |
| 183 | 1 | 0 | 5.517334  | 1.161864  | 5.571070  |     |   |   |           |           |           |
| 184 | 1 | 0 | 7.532060  | -0.109576 | 4.920496  |     |   |   |           |           |           |

**(2R,5R)-4b-OOH (included)**

| Center Number | Atomic Number | Atomic Type | Coordinates (Angstroms) |           |           |
|---------------|---------------|-------------|-------------------------|-----------|-----------|
|               |               |             | X                       | Y         | Z         |
| 1             | 6             | 0           | -0.815741               | 2.496646  | -2.807938 |
| 2             | 6             | 0           | -0.686719               | 4.010839  | -2.711344 |
| 3             | 6             | 0           | -1.988742               | 4.662178  | -3.166894 |
| 4             | 6             | 0           | -3.170098               | 4.092360  | -2.403887 |
| 5             | 6             | 0           | -3.201241               | 2.572836  | -2.415410 |
| 6             | 6             | 0           | -3.728820               | 1.901405  | -3.688667 |
| 7             | 6             | 0           | 4.373102                | 1.295006  | -3.141239 |
| 8             | 6             | 0           | 3.887648                | 2.707273  | -2.905513 |
| 9             | 6             | 0           | 2.566406                | 2.658848  | -2.175307 |
| 10            | 6             | 0           | 1.547699                | 1.938934  | -3.037539 |
| 11            | 6             | 0           | 2.035551                | 0.528504  | -3.360947 |
| 12            | 6             | 0           | 1.225396                | -0.135268 | -4.484263 |
| 13            | 6             | 0           | 5.752391                | -3.168708 | -0.954299 |
| 14            | 6             | 0           | 6.560201                | -2.046472 | -0.280822 |
| 15            | 6             | 0           | 5.798133                | -0.735810 | -0.405590 |
| 16            | 6             | 0           | 5.662308                | -0.308190 | -1.854824 |
| 17            | 6             | 0           | 5.390749                | -1.542170 | -2.747112 |
| 18            | 6             | 0           | 6.650584                | -1.945790 | -3.520341 |
| 19            | 6             | 0           | 1.738455                | -4.511461 | 1.296345  |
| 20            | 6             | 0           | 3.038088                | -4.511549 | 2.090693  |
| 21            | 6             | 0           | 4.048814                | -5.400827 | 1.365179  |
| 22            | 6             | 0           | 4.251092                | -4.948484 | -0.079458 |
| 23            | 6             | 0           | 2.948805                | -4.723601 | -0.837307 |
| 24            | 6             | 0           | 2.272699                | -5.986752 | -1.359655 |
| 25            | 6             | 0           | -1.625873               | -2.563067 | 4.978687  |
| 26            | 6             | 0           | -0.140718               | -2.547344 | 5.265456  |

|    |   |   |           |           |           |     |   |   |           |           |           |
|----|---|---|-----------|-----------|-----------|-----|---|---|-----------|-----------|-----------|
| 27 | 6 | 0 | 0.651686  | -2.595680 | 3.973969  | 83  | 6 | 0 | -4.911392 | -3.335613 | -4.901697 |
| 28 | 6 | 0 | 0.221109  | -3.782028 | 3.123144  | 84  | 6 | 0 | -3.709333 | -1.793516 | -1.693447 |
| 29 | 6 | 0 | -1.282190 | -3.764209 | 2.932122  | 85  | 6 | 0 | -3.846098 | -0.551397 | -3.924033 |
| 30 | 6 | 0 | -1.850971 | -4.985614 | 2.240201  | 86  | 8 | 0 | -3.367344 | -0.578506 | -5.044788 |
| 31 | 6 | 0 | -4.607747 | 1.741405  | 3.969823  | 87  | 6 | 0 | -0.578471 | -0.505970 | 0.003063  |
| 32 | 6 | 0 | -3.662942 | 1.710892  | 5.155961  | 88  | 6 | 0 | -0.835953 | 0.509788  | 1.138171  |
| 33 | 6 | 0 | -2.516837 | 0.761960  | 4.884608  | 89  | 6 | 0 | 0.153587  | 1.691611  | 1.160561  |
| 34 | 6 | 0 | -3.060290 | -0.601261 | 4.495815  | 90  | 6 | 0 | 1.621014  | 1.317547  | 1.446422  |
| 35 | 6 | 0 | -3.954633 | -0.472270 | 3.270338  | 91  | 6 | 0 | 2.507104  | 2.579955  | 1.513834  |
| 36 | 6 | 0 | -4.589073 | -1.758092 | 2.759883  | 92  | 6 | 0 | 4.006988  | 2.277347  | 1.695754  |
| 37 | 6 | 0 | -4.174642 | 4.920663  | -0.343689 | 93  | 6 | 0 | 4.868050  | 3.545936  | 1.524829  |
| 38 | 6 | 0 | -3.820991 | 5.470235  | 1.028326  | 94  | 6 | 0 | 6.355423  | 3.286430  | 1.831826  |
| 39 | 6 | 0 | -3.378923 | 4.367110  | 1.966626  | 95  | 6 | 0 | 7.263232  | 4.499345  | 1.538583  |
| 40 | 6 | 0 | -4.437939 | 3.286390  | 2.032518  | 96  | 6 | 0 | -2.252160 | -1.377842 | -1.574888 |
| 41 | 6 | 0 | -4.668907 | 2.723570  | 0.642798  | 97  | 8 | 0 | -1.543787 | -1.222804 | -2.572088 |
| 42 | 6 | 0 | -5.764143 | 1.676682  | 0.560906  | 98  | 7 | 0 | -1.843174 | -1.193579 | -0.320970 |
| 43 | 8 | 0 | -0.349553 | 4.417610  | -1.377385 | 99  | 6 | 0 | 7.017083  | 5.692303  | 2.483884  |
| 44 | 8 | 0 | -2.265787 | 4.294943  | -4.531918 | 100 | 6 | 0 | 8.019370  | 6.849178  | 2.283691  |
| 45 | 8 | 0 | -2.996846 | 4.516010  | -1.016002 | 101 | 6 | 0 | 7.856312  | 7.561824  | 0.926083  |
| 46 | 8 | 0 | -1.909469 | 2.064005  | -1.999533 | 102 | 8 | 0 | -6.367750 | -4.195140 | -3.128967 |
| 47 | 8 | 0 | 4.857318  | 3.437676  | -2.157759 | 103 | 8 | 0 | -6.918993 | -5.228885 | -4.015263 |
| 48 | 8 | 0 | 2.236500  | 4.030435  | -1.923520 | 104 | 1 | 0 | -0.943164 | 2.188683  | -3.825467 |
| 49 | 8 | 0 | 0.330420  | 1.857302  | -2.260957 | 105 | 1 | 0 | 0.126266  | 4.345078  | -3.337333 |
| 50 | 8 | 0 | 3.391023  | 0.600271  | -3.908497 | 106 | 1 | 0 | -1.938701 | 5.733010  | -3.023953 |
| 51 | 8 | 0 | 6.781893  | -2.309754 | 1.112828  | 107 | 1 | 0 | -4.092082 | 4.492753  | -2.799620 |
| 52 | 8 | 0 | 6.537008  | 0.267937  | 0.299428  | 108 | 1 | 0 | -3.875532 | 2.287710  | -1.639166 |
| 53 | 8 | 0 | 4.587149  | 0.647176  | -1.898917 | 109 | 1 | 0 | -2.987574 | 1.789961  | -4.458662 |
| 54 | 8 | 0 | 4.891899  | -2.639102 | -1.948342 | 110 | 1 | 0 | -4.551993 | 2.480546  | -4.089449 |
| 55 | 8 | 0 | 6.494001  | -3.320248 | -3.910591 | 111 | 1 | 0 | 5.275038  | 1.293745  | -3.734082 |
| 56 | 8 | 0 | 3.517910  | -3.163189 | 2.233429  | 112 | 1 | 0 | 3.726781  | 3.159980  | -3.877501 |
| 57 | 8 | 0 | 3.502324  | -6.734310 | 1.314042  | 113 | 1 | 0 | 2.694216  | 2.112264  | -1.256298 |
| 58 | 8 | 0 | 4.938219  | -3.688689 | 0.081305  | 114 | 1 | 0 | 1.387083  | 2.486572  | -3.956632 |
| 59 | 8 | 0 | 2.008837  | -3.987785 | 0.002022  | 115 | 1 | 0 | 2.040999  | -0.049977 | -2.450293 |
| 60 | 8 | 0 | 1.013904  | -5.627814 | -1.953891 | 116 | 1 | 0 | 1.378734  | -1.207712 | -4.456476 |
| 61 | 8 | 0 | 0.167070  | -1.332216 | 5.969875  | 117 | 1 | 0 | 1.632471  | 0.241031  | -5.410010 |
| 62 | 8 | 0 | 2.016560  | -2.672471 | 4.399197  | 118 | 1 | 0 | 6.368217  | -3.944081 | -1.380477 |
| 63 | 8 | 0 | 0.783759  | -3.603163 | 1.805177  | 119 | 1 | 0 | 7.535697  | -1.940273 | -0.725631 |
| 64 | 8 | 0 | -1.914783 | -3.751292 | 4.245604  | 120 | 1 | 0 | 4.801357  | -0.855948 | -0.005010 |
| 65 | 8 | 0 | -3.299783 | -4.893992 | 2.282507  | 121 | 1 | 0 | 6.582062  | 0.182127  | -2.148897 |
| 66 | 8 | 0 | -3.160366 | 3.044431  | 5.353964  | 122 | 1 | 0 | 4.592774  | -1.324325 | -3.431338 |
| 67 | 8 | 0 | -1.764413 | 0.712007  | 6.098875  | 123 | 1 | 0 | 7.541422  | -1.826896 | -2.914003 |
| 68 | 8 | 0 | -1.918616 | -1.423990 | 4.201098  | 124 | 1 | 0 | 6.744952  | -1.283514 | -4.373965 |
| 69 | 8 | 0 | -5.039778 | 0.412414  | 3.680222  | 125 | 1 | 0 | 1.346020  | -5.514991 | 1.250645  |
| 70 | 8 | 0 | -3.747585 | -2.287984 | 1.715038  | 126 | 1 | 0 | 2.877655  | -4.877444 | 3.091752  |
| 71 | 8 | 0 | -2.789884 | 6.442964  | 0.873894  | 127 | 1 | 0 | 5.003856  | -5.365461 | 1.868961  |
| 72 | 8 | 0 | -3.194949 | 4.994467  | 3.238014  | 128 | 1 | 0 | 4.877959  | -5.656362 | -0.605840 |
| 73 | 8 | 0 | -3.885616 | 2.260110  | 2.876464  | 129 | 1 | 0 | 3.144753  | -4.052287 | -1.653470 |
| 74 | 8 | 0 | -5.085248 | 3.830148  | -0.203192 | 130 | 1 | 0 | 2.146892  | -6.714082 | -0.574544 |
| 75 | 8 | 0 | -5.530204 | 0.898916  | -0.639343 | 131 | 1 | 0 | 2.885986  | -6.421324 | -2.135327 |
| 76 | 7 | 0 | -4.176954 | 0.574583  | -3.273947 | 132 | 1 | 0 | -2.213262 | -2.592470 | 5.881980  |
| 77 | 8 | 0 | -0.154435 | 0.216277  | -4.459767 | 133 | 1 | 0 | 0.112690  | -3.411125 | 5.863631  |
| 78 | 6 | 0 | -6.123710 | -3.066609 | -4.018915 | 134 | 1 | 0 | 0.455091  | -1.696084 | 3.411235  |
| 79 | 7 | 0 | -5.660358 | -1.993690 | -3.176361 | 135 | 1 | 0 | 0.546377  | -4.706199 | 3.586158  |
| 80 | 8 | 0 | -6.484537 | -1.348692 | -2.357426 | 136 | 1 | 0 | -1.569586 | -2.877196 | 2.402946  |
| 81 | 6 | 0 | -3.726528 | -3.066451 | -3.943968 | 137 | 1 | 0 | -1.527004 | -5.893143 | 2.733241  |
| 82 | 6 | 0 | -4.178810 | -1.835667 | -3.143975 | 138 | 1 | 0 | -1.565146 | -5.003348 | 1.202826  |

|     |   |   |           |           |           |     |   |   |           |           |           |
|-----|---|---|-----------|-----------|-----------|-----|---|---|-----------|-----------|-----------|
| 139 | 1 | 0 | -5.492756 | 2.321280  | 4.174554  | 195 | 1 | 0 | 7.114593  | 4.801683  | 0.507534  |
| 140 | 1 | 0 | -4.197985 | 1.368502  | 6.030734  | 196 | 1 | 0 | 8.302142  | 4.193159  | 1.636244  |
| 141 | 1 | 0 | -1.931948 | 1.148428  | 4.062818  | 197 | 1 | 0 | -4.298881 | -1.093439 | -1.121879 |
| 142 | 1 | 0 | -3.624527 | -1.019847 | 5.320993  | 198 | 1 | 0 | -3.850815 | -2.769495 | -1.245127 |
| 143 | 1 | 0 | -3.409740 | -0.020229 | 2.463205  | 199 | 1 | 0 | 7.089448  | 5.338496  | 3.509161  |
| 144 | 1 | 0 | -5.566363 | -1.514606 | 2.370498  | 200 | 1 | 0 | 6.010417  | 6.072747  | 2.346707  |
| 145 | 1 | 0 | -4.707030 | -2.475663 | 3.563190  | 201 | 1 | 0 | 7.882165  | 7.576265  | 3.078708  |
| 146 | 1 | 0 | -4.698624 | 5.656554  | -0.931200 | 202 | 1 | 0 | 9.031435  | 6.465156  | 2.373208  |
| 147 | 1 | 0 | -4.721104 | 5.907106  | 1.444841  | 203 | 1 | 0 | 6.844571  | 7.938711  | 0.816704  |
| 148 | 1 | 0 | -2.461576 | 3.924546  | 1.601530  | 204 | 1 | 0 | 8.057443  | 6.888197  | 0.102261  |
| 149 | 1 | 0 | -5.351714 | 3.683164  | 2.458417  | 205 | 1 | 0 | 8.539610  | 8.400975  | 0.847117  |
| 150 | 1 | 0 | -3.743025 | 2.297057  | 0.293800  | 206 | 1 | 0 | -7.040032 | -2.823869 | -4.523602 |
| 151 | 1 | 0 | -6.715655 | 2.188261  | 0.513501  | 207 | 1 | 0 | -7.460720 | -5.721993 | -3.378633 |
| 152 | 1 | 0 | -5.728351 | 1.041674  | 1.431693  |     |   |   |           |           |           |
| 153 | 1 | 0 | -1.150449 | 4.477352  | -0.827696 |     |   |   |           |           |           |
| 154 | 1 | 0 | -1.636445 | 4.685973  | -5.151359 |     |   |   |           |           |           |
| 155 | 1 | 0 | 4.402423  | 4.212850  | -1.794951 |     |   |   |           |           |           |
| 156 | 1 | 0 | 1.382657  | 4.148099  | -1.457799 |     |   |   |           |           |           |
| 157 | 1 | 0 | 6.000552  | -2.764764 | 1.463627  |     |   |   |           |           |           |
| 158 | 1 | 0 | 6.795543  | -0.098006 | 1.158770  |     |   |   |           |           |           |
| 159 | 1 | 0 | 7.128661  | -3.558714 | -4.598429 |     |   |   |           |           |           |
| 160 | 1 | 0 | 3.522480  | -2.741842 | 1.360892  |     |   |   |           |           |           |
| 161 | 1 | 0 | 3.803472  | -7.284133 | 2.047994  |     |   |   |           |           |           |
| 162 | 1 | 0 | 0.656577  | -4.857155 | -1.489156 |     |   |   |           |           |           |
| 163 | 1 | 0 | 1.130444  | -1.224332 | 5.981375  |     |   |   |           |           |           |
| 164 | 1 | 0 | 2.638772  | -2.607038 | 3.645836  |     |   |   |           |           |           |
| 165 | 1 | 0 | -3.559118 | -4.888559 | 3.216005  |     |   |   |           |           |           |
| 166 | 1 | 0 | -2.436550 | 3.003809  | 5.997437  |     |   |   |           |           |           |
| 167 | 1 | 0 | -1.017327 | 0.082512  | 6.037460  |     |   |   |           |           |           |
| 168 | 1 | 0 | -3.711699 | -3.265128 | 1.743458  |     |   |   |           |           |           |
| 169 | 1 | 0 | -2.462562 | 6.674993  | 1.755857  |     |   |   |           |           |           |
| 170 | 1 | 0 | -3.073107 | 4.333691  | 3.948264  |     |   |   |           |           |           |
| 171 | 1 | 0 | -6.253747 | 0.296125  | -0.861030 |     |   |   |           |           |           |
| 172 | 1 | 0 | -4.666919 | 0.537021  | -2.404851 |     |   |   |           |           |           |
| 173 | 1 | 0 | -0.666297 | -0.304808 | -3.811100 |     |   |   |           |           |           |
| 174 | 1 | 0 | -4.931486 | -4.342195 | -5.285364 |     |   |   |           |           |           |
| 175 | 1 | 0 | -4.880736 | -2.617299 | -5.707650 |     |   |   |           |           |           |
| 176 | 1 | 0 | -2.806609 | -2.861915 | -4.461203 |     |   |   |           |           |           |
| 177 | 1 | 0 | -3.610601 | -3.908311 | -3.275566 |     |   |   |           |           |           |
| 178 | 1 | 0 | -2.469690 | -1.431674 | 0.427983  |     |   |   |           |           |           |
| 179 | 1 | 0 | -0.269669 | 0.020835  | -0.883828 |     |   |   |           |           |           |
| 180 | 1 | 0 | 0.173254  | -1.233150 | 0.285951  |     |   |   |           |           |           |
| 181 | 1 | 0 | -1.823261 | 0.923508  | 0.971707  |     |   |   |           |           |           |
| 182 | 1 | 0 | -0.849410 | 0.002256  | 2.098010  |     |   |   |           |           |           |
| 183 | 1 | 0 | 0.094116  | 2.198699  | 0.206579  |     |   |   |           |           |           |
| 184 | 1 | 0 | -0.172441 | 2.391710  | 1.927209  |     |   |   |           |           |           |
| 185 | 1 | 0 | 1.992618  | 0.664733  | 0.661868  |     |   |   |           |           |           |
| 186 | 1 | 0 | 1.689886  | 0.771772  | 2.385259  |     |   |   |           |           |           |
| 187 | 1 | 0 | 2.167221  | 3.207784  | 2.333600  |     |   |   |           |           |           |
| 188 | 1 | 0 | 2.372266  | 3.152362  | 0.603331  |     |   |   |           |           |           |
| 189 | 1 | 0 | 4.171716  | 1.849496  | 2.682524  |     |   |   |           |           |           |
| 190 | 1 | 0 | 4.336137  | 1.553243  | 0.960108  |     |   |   |           |           |           |
| 191 | 1 | 0 | 4.479903  | 4.337707  | 2.157783  |     |   |   |           |           |           |
| 192 | 1 | 0 | 4.783285  | 3.863780  | 0.491821  |     |   |   |           |           |           |
| 193 | 1 | 0 | 6.465320  | 3.001671  | 2.876473  |     |   |   |           |           |           |
| 194 | 1 | 0 | 6.672770  | 2.449485  | 1.223346  |     |   |   |           |           |           |

  

| <b>(2S,5R)-4a-OOH (excluded)</b> |        |        |                         |           |           |  |  |  |  |  |  |
|----------------------------------|--------|--------|-------------------------|-----------|-----------|--|--|--|--|--|--|
| Center                           | Atomic | Atomic | Coordinates (Angstroms) |           |           |  |  |  |  |  |  |
| Number                           | Number | Type   | X                       | Y         | Z         |  |  |  |  |  |  |
| -----                            |        |        |                         |           |           |  |  |  |  |  |  |
| 1                                | 6      | 0      | -4.556010               | 2.381136  | 0.199294  |  |  |  |  |  |  |
| 2                                | 6      | 0      | -4.802326               | 3.456461  | -0.858698 |  |  |  |  |  |  |
| 3                                | 6      | 0      | -4.693949               | 4.832295  | -0.208994 |  |  |  |  |  |  |
| 4                                | 6      | 0      | -3.398744               | 5.013962  | 0.583560  |  |  |  |  |  |  |
| 5                                | 6      | 0      | -3.097150               | 3.838308  | 1.512208  |  |  |  |  |  |  |
| 6                                | 6      | 0      | -3.886057               | 3.951312  | 2.832815  |  |  |  |  |  |  |
| 7                                | 6      | 0      | -5.993272               | -2.172023 | -2.295885 |  |  |  |  |  |  |
| 8                                | 6      | 0      | -5.820914               | -0.929112 | -3.138887 |  |  |  |  |  |  |
| 9                                | 6      | 0      | -4.910757               | 0.022881  | -2.392904 |  |  |  |  |  |  |
| 10                               | 6      | 0      | -5.471820               | 0.392575  | -1.036554 |  |  |  |  |  |  |
| 11                               | 6      | 0      | -5.782985               | -0.866951 | -0.216687 |  |  |  |  |  |  |
| 12                               | 6      | 0      | -6.672766               | -0.587374 | 0.981251  |  |  |  |  |  |  |
| 13                               | 6      | 0      | -2.137031               | -5.862480 | -2.054540 |  |  |  |  |  |  |
| 14                               | 6      | 0      | -2.390840               | -5.247448 | -3.421979 |  |  |  |  |  |  |
| 15                               | 6      | 0      | -3.052102               | -3.902353 | -3.192445 |  |  |  |  |  |  |
| 16                               | 6      | 0      | -4.322279               | -4.044876 | -2.392380 |  |  |  |  |  |  |
| 17                               | 6      | 0      | -4.095043               | -4.816368 | -1.094004 |  |  |  |  |  |  |
| 18                               | 6      | 0      | -5.386226               | -5.279386 | -0.423503 |  |  |  |  |  |  |
| 19                               | 6      | 0      | 2.508079                | -3.611329 | -1.211049 |  |  |  |  |  |  |
| 20                               | 6      | 0      | 1.627234                | -4.527810 | -2.043940 |  |  |  |  |  |  |
| 21                               | 6      | 0      | 0.939832                | -5.653995 | -1.238818 |  |  |  |  |  |  |
| 22                               | 6      | 0      | -0.321304               | -5.353772 | -0.399370 |  |  |  |  |  |  |
| 23                               | 6      | 0      | -0.287371               | -4.254174 | 0.667382  |  |  |  |  |  |  |
| 24                               | 6      | 0      | 0.670650                | -4.522614 | 1.853383  |  |  |  |  |  |  |
| 25                               | 6      | 0      | 5.232086                | 0.524446  | -0.709771 |  |  |  |  |  |  |
| 26                               | 6      | 0      | 6.007715                | -0.273921 | -1.765256 |  |  |  |  |  |  |
| 27                               | 6      | 0      | 5.157474                | -1.358986 | -2.431181 |  |  |  |  |  |  |
| 28                               | 6      | 0      | 4.339710                | -2.090686 | -1.380532 |  |  |  |  |  |  |
| 29                               | 6      | 0      | 3.486038                | -1.059967 | -0.662763 |  |  |  |  |  |  |
| 30                               | 6      | 0      | 2.384120                | -1.652076 | 0.177430  |  |  |  |  |  |  |
| 31                               | 6      | 0      | 3.241358                | 5.377606  | -1.502668 |  |  |  |  |  |  |
| 32                               | 6      | 0      | 3.864038                | 4.791268  | -2.758666 |  |  |  |  |  |  |
| 33                               | 6      | 0      | 3.890988                | 3.277114  | -2.661854 |  |  |  |  |  |  |
| 34                               | 6      | 0      | 4.502919                | 2.815292  | -1.357797 |  |  |  |  |  |  |
| 35                               | 6      | 0      | 3.753538                | 3.436629  | -0.183031 |  |  |  |  |  |  |
| 36                               | 6      | 0      | 4.266048                | 3.091296  | 1.215859  |  |  |  |  |  |  |
| 37                               | 6      | 0      | -1.959934               | 6.368854  | -0.881571 |  |  |  |  |  |  |

|    |   |   |           |           |           |     |   |   |           |           |           |
|----|---|---|-----------|-----------|-----------|-----|---|---|-----------|-----------|-----------|
| 38 | 6 | 0 | -1.528681 | 6.123183  | -2.316928 | 94  | 1 | 0 | -3.417604 | 4.721797  | 3.429328  |
| 39 | 6 | 0 | -0.266759 | 5.278816  | -2.323359 | 95  | 1 | 0 | -6.652475 | -2.891962 | -2.755976 |
| 40 | 6 | 0 | 0.802626  | 5.892735  | -1.448304 | 96  | 1 | 0 | -6.783915 | -0.466626 | -3.293154 |
| 41 | 6 | 0 | 0.273175  | 6.073255  | -0.030210 | 97  | 1 | 0 | -3.947243 | -0.434923 | -2.246198 |
| 42 | 6 | 0 | 1.246720  | 6.757684  | 0.901773  | 98  | 1 | 0 | -6.357796 | 1.002958  | -1.167129 |
| 43 | 8 | 0 | -3.869200 | 3.384523  | -1.931446 | 99  | 1 | 0 | -4.865199 | -1.329045 | 0.103449  |
| 44 | 8 | 0 | -5.776383 | 4.968446  | 0.741027  | 100 | 1 | 0 | -7.645749 | -0.270113 | 0.624778  |
| 45 | 8 | 0 | -2.328425 | 5.097409  | -0.373981 | 101 | 1 | 0 | -6.221146 | 0.183611  | 1.573415  |
| 46 | 8 | 0 | -3.321253 | 2.581665  | 0.847707  | 102 | 1 | 0 | -1.685331 | -6.839165 | -2.119884 |
| 47 | 8 | 0 | -5.262452 | -1.197523 | -4.424992 | 103 | 1 | 0 | -3.054379 | -5.891959 | -3.977895 |
| 48 | 8 | 0 | -4.781255 | 1.227730  | -3.181418 | 104 | 1 | 0 | -2.374823 | -3.264958 | -2.649435 |
| 49 | 8 | 0 | -4.410571 | 1.085684  | -0.360594 | 105 | 1 | 0 | -5.076537 | -4.522304 | -3.006659 |
| 50 | 8 | 0 | -6.560549 | -1.819644 | -1.035514 | 106 | 1 | 0 | -3.519320 | -4.214744 | -0.413152 |
| 51 | 8 | 0 | -1.210989 | -5.075937 | -4.199316 | 107 | 1 | 0 | -5.125877 | -6.006716 | 0.325418  |
| 52 | 8 | 0 | -3.415602 | -3.294144 | -4.452445 | 108 | 1 | 0 | -6.046493 | -5.740420 | -1.146950 |
| 53 | 8 | 0 | -4.706477 | -2.697482 | -2.065938 | 109 | 1 | 0 | 2.948595  | -4.141790 | -0.385168 |
| 54 | 8 | 0 | -3.396305 | -6.043472 | -1.411175 | 110 | 1 | 0 | 2.285732  | -4.999788 | -2.757113 |
| 55 | 8 | 0 | -6.056809 | -4.202565 | 0.274104  | 111 | 1 | 0 | 0.615444  | -6.380379 | -1.976864 |
| 56 | 8 | 0 | 0.687547  | -3.748282 | -2.797520 | 112 | 1 | 0 | -0.617248 | -6.296662 | 0.046104  |
| 57 | 8 | 0 | 1.926895  | -6.250118 | -0.369587 | 113 | 1 | 0 | -1.299936 | -4.116697 | 1.026176  |
| 58 | 8 | 0 | -1.328909 | -4.933358 | -1.363656 | 114 | 1 | 0 | 1.485360  | -5.150890 | 1.542547  |
| 59 | 8 | 0 | 1.702576  | -2.535265 | -0.749291 | 115 | 1 | 0 | 0.135866  | -5.033925 | 2.647278  |
| 60 | 8 | 0 | 1.267994  | -3.303015 | 2.333958  | 116 | 1 | 0 | 5.913015  | 1.061887  | -0.073266 |
| 61 | 8 | 0 | 6.555970  | 0.665379  | -2.684773 | 117 | 1 | 0 | 6.836568  | -0.775699 | -1.293963 |
| 62 | 8 | 0 | 6.054270  | -2.266888 | -3.078087 | 118 | 1 | 0 | 4.470458  | -0.904574 | -3.135026 |
| 63 | 8 | 0 | 3.528647  | -3.076295 | -2.056965 | 119 | 1 | 0 | 4.990973  | -2.578089 | -0.665989 |
| 64 | 8 | 0 | 4.420486  | -0.297454 | 0.137988  | 120 | 1 | 0 | 3.024239  | -0.408000 | -1.385875 |
| 65 | 8 | 0 | 1.471743  | -0.685916 | 0.607649  | 121 | 1 | 0 | 2.697964  | -2.197869 | 1.042201  |
| 66 | 8 | 0 | 3.158722  | 5.188054  | -3.936042 | 122 | 1 | 0 | 0.026601  | -3.338547 | 0.208334  |
| 67 | 8 | 0 | 4.699147  | 2.723535  | -3.718866 | 123 | 1 | 0 | 3.323898  | 6.452361  | -1.482930 |
| 68 | 8 | 0 | 4.343256  | 1.388830  | -1.390733 | 124 | 1 | 0 | 4.877698  | 5.149998  | -2.852030 |
| 69 | 8 | 0 | 3.902502  | 4.878174  | -0.347546 | 125 | 1 | 0 | 2.879138  | 2.902260  | -2.714353 |
| 70 | 8 | 0 | 3.597504  | 1.946956  | 1.763048  | 126 | 1 | 0 | 5.550883  | 3.082371  | -1.330277 |
| 71 | 8 | 0 | -2.548769 | 5.489067  | -3.081801 | 127 | 1 | 0 | 2.710684  | 3.175254  | -0.229556 |
| 72 | 8 | 0 | 0.276727  | 5.211719  | -3.660025 | 128 | 1 | 0 | 4.014991  | 3.920866  | 1.855304  |
| 73 | 8 | 0 | 1.888973  | 4.955560  | -1.485804 | 129 | 1 | 0 | 5.345547  | 2.981647  | 1.216203  |
| 74 | 8 | 0 | -0.892452 | 6.930104  | -0.138352 | 130 | 1 | 0 | -2.776062 | 7.072319  | -0.826941 |
| 75 | 8 | 0 | 0.657157  | 6.688449  | 2.213220  | 131 | 1 | 0 | -1.310617 | 7.072110  | -2.784497 |
| 76 | 7 | 0 | -3.891140 | 2.704839  | 3.589856  | 132 | 1 | 0 | -0.496563 | 4.290606  | -1.953333 |
| 77 | 8 | 0 | -6.780607 | -1.727983 | 1.852470  | 133 | 1 | 0 | 1.105327  | 6.845967  | -1.864727 |
| 78 | 6 | 0 | -2.497004 | -0.425188 | 4.314131  | 134 | 1 | 0 | -0.003572 | 5.119185  | 0.384868  |
| 79 | 6 | 0 | -2.769427 | -1.591474 | 5.313549  | 135 | 1 | 0 | 1.381652  | 7.783316  | 0.578055  |
| 80 | 6 | 0 | -3.161995 | -2.792498 | 4.423045  | 136 | 1 | 0 | 2.192665  | 6.234212  | 0.866942  |
| 81 | 6 | 0 | -3.899058 | -2.166003 | 3.240883  | 137 | 1 | 0 | -4.035635 | 2.570633  | -2.456758 |
| 82 | 7 | 0 | -3.390771 | -0.807860 | 3.203385  | 138 | 1 | 0 | -6.587622 | 5.280648  | 0.320739  |
| 83 | 8 | 0 | -4.064631 | 0.112627  | 2.523471  | 139 | 1 | 0 | -4.570260 | -1.895144 | -4.404458 |
| 84 | 6 | 0 | -1.030420 | -0.564361 | 3.859606  | 140 | 1 | 0 | -4.681973 | 0.971925  | -4.112208 |
| 85 | 8 | 0 | -0.674533 | -1.667279 | 3.429801  | 141 | 1 | 0 | -0.522455 | -4.577544 | -3.702339 |
| 86 | 7 | 0 | -0.218041 | 0.467917  | 4.010341  | 142 | 1 | 0 | -2.703678 | -3.443613 | -5.093276 |
| 87 | 6 | 0 | 1.190947  | 0.379480  | 3.580478  | 143 | 1 | 0 | -6.260771 | -3.425859 | -0.275235 |
| 88 | 1 | 0 | -5.380077 | 2.412414  | 0.899954  | 144 | 1 | 0 | 0.405749  | -3.002160 | -2.247116 |
| 89 | 1 | 0 | -5.817631 | 3.346885  | -1.229646 | 145 | 1 | 0 | 2.394792  | -6.981431 | -0.792074 |
| 90 | 1 | 0 | -4.742786 | 5.585485  | -0.984115 | 146 | 1 | 0 | 0.599295  | -2.687042 | 2.694016  |
| 91 | 1 | 0 | -3.461393 | 5.927289  | 1.160838  | 147 | 1 | 0 | 5.862117  | 1.198548  | -3.115929 |
| 92 | 1 | 0 | -2.046127 | 3.836391  | 1.738981  | 148 | 1 | 0 | 5.539594  | -2.966816 | -3.503830 |
| 93 | 1 | 0 | -4.907307 | 4.230163  | 2.641141  | 149 | 1 | 0 | 0.997428  | -0.274760 | -0.128010 |



|     |   |   |           |           |           |     |   |   |           |           |           |
|-----|---|---|-----------|-----------|-----------|-----|---|---|-----------|-----------|-----------|
| 49  | 8 | 0 | 3.067606  | -1.402151 | 1.671718  | 105 | 1 | 0 | 7.200639  | 1.235861  | -0.397713 |
| 50  | 8 | 0 | 2.178941  | -4.874866 | 2.374760  | 106 | 1 | 0 | 0.591462  | -5.590057 | 3.388223  |
| 51  | 8 | 0 | -4.793852 | -4.339770 | 2.076263  | 107 | 1 | 0 | 1.743122  | -3.811129 | 4.657917  |
| 52  | 8 | 0 | -2.363594 | -4.283322 | 3.481160  | 108 | 1 | 0 | 0.783118  | -2.046925 | 2.406243  |
| 53  | 8 | 0 | -0.035758 | -4.282410 | 1.911041  | 109 | 1 | 0 | 3.601995  | -2.646520 | 3.287616  |
| 54  | 8 | 0 | -2.476816 | -6.005833 | -0.223947 | 110 | 1 | 0 | 2.117195  | -3.508596 | 0.795265  |
| 55  | 8 | 0 | 1.162399  | -5.836804 | -0.308049 | 111 | 1 | 0 | 4.644543  | -4.648662 | 1.979028  |
| 56  | 8 | 0 | -4.632244 | -1.917555 | 0.868789  | 112 | 1 | 0 | 4.603102  | -3.524140 | 0.609600  |
| 57  | 8 | 0 | -7.056422 | -3.051268 | -1.679533 | 113 | 1 | 0 | -4.484553 | -5.964414 | -0.170964 |
| 58  | 8 | 0 | -3.746596 | -4.061456 | -0.497534 | 114 | 1 | 0 | -3.706778 | -6.057889 | 2.130178  |
| 59  | 8 | 0 | -4.526287 | -0.456829 | -1.403810 | 115 | 1 | 0 | -2.380097 | -3.395519 | 1.602679  |
| 60  | 8 | 0 | -4.888373 | -1.395552 | -4.308675 | 116 | 1 | 0 | -1.086327 | -6.076515 | 2.088665  |
| 61  | 8 | 0 | -5.787963 | 5.321956  | 0.504586  | 117 | 1 | 0 | -1.208866 | -4.357519 | -0.416768 |
| 62  | 8 | 0 | -7.227268 | 2.798413  | 1.083477  | 118 | 1 | 0 | -0.401768 | -6.379115 | -1.573145 |
| 63  | 8 | 0 | -6.062756 | 0.485044  | 0.034834  | 119 | 1 | 0 | -0.291962 | -7.231704 | -0.040757 |
| 64  | 8 | 0 | -4.827841 | 3.068544  | -2.233420 | 120 | 1 | 0 | -6.563013 | -0.697859 | -1.586693 |
| 65  | 8 | 0 | -3.242259 | 0.515931  | -3.011714 | 121 | 1 | 0 | -6.640301 | -1.783260 | 0.694296  |
| 66  | 8 | 0 | -0.419238 | 6.970179  | 1.592253  | 122 | 1 | 0 | -6.206796 | -3.938948 | 0.004179  |
| 67  | 8 | 0 | -3.127119 | 6.128396  | 1.181227  | 123 | 1 | 0 | -5.128200 | -4.764088 | -1.885574 |
| 68  | 8 | 0 | -3.580750 | 4.211864  | -0.664804 | 124 | 1 | 0 | -3.224017 | -3.687233 | -2.921934 |
| 69  | 8 | 0 | -0.435165 | 5.701177  | -1.857301 | 125 | 1 | 0 | -5.985705 | -2.952408 | -3.655084 |
| 70  | 8 | 0 | -2.460966 | 3.058193  | -3.335200 | 126 | 1 | 0 | -4.657609 | -3.427945 | -4.696084 |
| 71  | 8 | 0 | 2.838924  | 3.520166  | 4.008679  | 127 | 1 | 0 | -4.882544 | 5.088637  | -2.016590 |
| 72  | 8 | 0 | 0.616433  | 4.774774  | 2.724439  | 128 | 1 | 0 | -6.875823 | 4.315313  | -0.868467 |
| 73  | 8 | 0 | 0.803878  | 4.960978  | -0.071594 | 129 | 1 | 0 | -5.136033 | 2.758097  | 1.034740  |
| 74  | 8 | 0 | 4.311313  | 4.957569  | 0.967835  | 130 | 1 | 0 | -6.781005 | 1.853392  | -1.342129 |
| 75  | 8 | 0 | 4.518573  | 4.452562  | -1.865277 | 131 | 1 | 0 | -3.798787 | 1.935470  | -0.821304 |
| 76  | 7 | 0 | 6.312105  | -0.524140 | -1.053203 | 132 | 1 | 0 | -5.283169 | 0.522548  | -3.051585 |
| 77  | 8 | 0 | 3.847587  | -5.359580 | 0.182442  | 133 | 1 | 0 | -3.682756 | -2.135428 | -2.264145 |
| 78  | 6 | 0 | 4.436633  | -1.918202 | -3.654579 | 134 | 1 | 0 | 0.869434  | 6.875064  | -0.867291 |
| 79  | 6 | 0 | 4.656822  | -2.998656 | -4.754823 | 135 | 1 | 0 | -1.347314 | 7.503341  | -0.127054 |
| 80  | 6 | 0 | 3.692761  | -4.143911 | -4.388695 | 136 | 1 | 0 | -1.630674 | 4.697046  | 0.939501  |
| 81  | 6 | 0 | 3.620223  | -4.126292 | -2.862597 | 137 | 1 | 0 | -2.973316 | 6.054949  | -1.409238 |
| 82  | 7 | 0 | 3.956742  | -2.753084 | -2.542369 | 138 | 1 | 0 | -0.971895 | 3.770643  | -1.254813 |
| 83  | 8 | 0 | 3.996051  | -2.306111 | -1.291817 | 139 | 1 | 0 | -0.745239 | 4.097243  | -3.690772 |
| 84  | 6 | 0 | 3.286478  | -1.001929 | -4.123226 | 140 | 1 | 0 | -2.183646 | 5.097093  | -3.701235 |
| 85  | 8 | 0 | 2.239136  | -1.532212 | -4.475874 | 141 | 1 | 0 | 5.150958  | 4.398449  | 2.714229  |
| 86  | 7 | 0 | 3.504153  | 0.313314  | -4.149448 | 142 | 1 | 0 | 3.024692  | 5.424614  | 3.319799  |
| 87  | 6 | 0 | 2.458619  | 1.262053  | -4.558536 | 143 | 1 | 0 | 1.646672  | 3.288428  | 1.697097  |
| 88  | 6 | 0 | 2.215084  | 2.345336  | -3.485515 | 144 | 1 | 0 | 2.049424  | 6.212894  | 1.037256  |
| 89  | 6 | 0 | 1.232084  | 1.933942  | -2.365662 | 145 | 1 | 0 | 3.139328  | 3.620740  | -0.112222 |
| 90  | 6 | 0 | 1.603856  | 0.630688  | -1.628067 | 146 | 1 | 0 | 3.934443  | 6.322847  | -1.098309 |
| 91  | 6 | 0 | 0.864148  | 0.468146  | -0.285147 | 147 | 1 | 0 | 2.644223  | 5.378447  | -1.871952 |
| 92  | 6 | 0 | -0.674768 | 0.470056  | -0.408164 | 148 | 1 | 0 | 2.414515  | 0.194663  | 3.605988  |
| 93  | 6 | 0 | -1.386479 | -0.137833 | 0.821654  | 149 | 1 | 0 | 7.005995  | 0.214290  | 3.839434  |
| 94  | 6 | 0 | -1.095631 | 0.612097  | 2.138095  | 150 | 1 | 0 | -1.003996 | -3.547486 | 4.186519  |
| 95  | 6 | 0 | -1.717080 | -0.052588 | 3.387775  | 151 | 1 | 0 | 0.833327  | -1.235842 | 4.701101  |
| 96  | 6 | 0 | -3.257824 | -0.014863 | 3.427624  | 152 | 1 | 0 | -4.728850 | -3.422935 | 1.726608  |
| 97  | 6 | 0 | -3.839601 | -0.820640 | 4.610099  | 153 | 1 | 0 | -3.254677 | -4.084706 | 3.806962  |
| 98  | 6 | 0 | -3.507397 | -0.221493 | 5.990596  | 154 | 1 | 0 | 1.321518  | -4.947903 | -0.665085 |
| 99  | 1 | 0 | 5.127769  | -1.257138 | 1.714435  | 155 | 1 | 0 | -3.840792 | -1.810450 | 0.322814  |
| 100 | 1 | 0 | 4.563423  | -0.525154 | 3.864188  | 156 | 1 | 0 | -7.905349 | -3.288456 | -1.285166 |
| 101 | 1 | 0 | 5.399477  | 1.849789  | 3.824212  | 157 | 1 | 0 | -3.992701 | -1.031886 | -4.245711 |
| 102 | 1 | 0 | 6.287208  | 2.627048  | 1.615819  | 158 | 1 | 0 | -4.872123 | 5.430678  | 0.825700  |
| 103 | 1 | 0 | 4.906493  | 1.796757  | -0.363474 | 159 | 1 | 0 | -7.298450 | 1.932758  | 1.509821  |
| 104 | 1 | 0 | 7.028236  | -0.011932 | 0.821000  | 160 | 1 | 0 | -2.722060 | 1.344260  | -3.097087 |

|     |   |   |           |           |           |    |   |   |           |           |           |
|-----|---|---|-----------|-----------|-----------|----|---|---|-----------|-----------|-----------|
| 161 | 1 | 0 | -0.092216 | 6.184913  | 2.085715  | 3  | 6 | 0 | -0.858874 | 6.201661  | 1.070405  |
| 162 | 1 | 0 | -2.792400 | 6.639523  | 1.932364  | 4  | 6 | 0 | -1.941182 | 5.148645  | 0.835058  |
| 163 | 1 | 0 | -3.409109 | 3.203820  | -3.162133 | 5  | 6 | 0 | -1.603433 | 4.150010  | -0.271808 |
| 164 | 1 | 0 | 2.942702  | 2.584814  | 3.711617  | 6  | 6 | 0 | -1.767522 | 4.710810  | -1.702452 |
| 165 | 1 | 0 | 0.622742  | 4.381847  | 3.610361  | 7  | 6 | 0 | 5.910970  | 3.592988  | -0.566697 |
| 166 | 1 | 0 | 4.850781  | 4.803679  | -2.700721 | 8  | 6 | 0 | 5.514702  | 4.288863  | 0.727130  |
| 167 | 1 | 0 | 5.682664  | -3.344265 | -4.709949 | 9  | 6 | 0 | 4.055744  | 3.986667  | 0.995760  |
| 168 | 1 | 0 | 4.462413  | -2.607225 | -5.741599 | 10 | 6 | 0 | 3.194012  | 4.406009  | -0.169703 |
| 169 | 1 | 0 | 4.008500  | -5.101053 | -4.771317 | 11 | 6 | 0 | 3.675247  | 3.750783  | -1.458862 |
| 170 | 1 | 0 | 2.705325  | -3.897332 | -4.739695 | 12 | 6 | 0 | 2.969272  | 4.284974  | -2.702650 |
| 171 | 1 | 0 | 3.084156  | -5.884185 | 0.469889  | 13 | 6 | 0 | 7.692168  | -1.430935 | -0.993785 |
| 172 | 1 | 0 | 4.336433  | 0.713620  | -3.757900 | 14 | 6 | 0 | 8.023339  | -0.648794 | 0.273062  |
| 173 | 1 | 0 | 2.768343  | 1.733669  | -5.485439 | 15 | 6 | 0 | 6.977388  | 0.421781  | 0.532089  |
| 174 | 1 | 0 | 1.562727  | 0.693338  | -4.751304 | 16 | 6 | 0 | 6.716284  | 1.252403  | -0.705268 |
| 175 | 1 | 0 | 1.803584  | 3.218035  | -3.988531 | 17 | 6 | 0 | 6.247958  | 0.318319  | -1.814775 |
| 176 | 1 | 0 | 3.158051  | 2.652085  | -3.046598 | 18 | 6 | 0 | 5.879439  | 0.972723  | -3.144915 |
| 177 | 1 | 0 | 1.187119  | 2.748929  | -1.648673 | 19 | 6 | 0 | 4.001376  | -4.533229 | 0.902487  |
| 178 | 1 | 0 | 0.238736  | 1.831508  | -2.793258 | 20 | 6 | 0 | 5.424251  | -4.132984 | 1.249796  |
| 179 | 1 | 0 | 2.663051  | 0.611049  | -1.409558 | 21 | 6 | 0 | 6.442006  | -4.429714 | 0.131648  |
| 180 | 1 | 0 | 1.382712  | -0.219489 | -2.263853 | 22 | 6 | 0 | 6.432594  | -3.581263 | -1.150705 |
| 181 | 1 | 0 | 1.205183  | -0.451405 | 0.174011  | 23 | 6 | 0 | 5.220477  | -3.558412 | -2.073496 |
| 182 | 1 | 0 | 1.180278  | 1.266777  | 0.377127  | 24 | 6 | 0 | 4.762418  | -4.890525 | -2.685600 |
| 183 | 1 | 0 | -1.028736 | 1.487752  | -0.547762 | 25 | 6 | 0 | -0.861222 | -4.602348 | 1.889479  |
| 184 | 1 | 0 | -0.979718 | -0.085171 | -1.290191 | 26 | 6 | 0 | -0.271687 | -5.563030 | 2.919880  |
| 185 | 1 | 0 | -2.453642 | -0.142960 | 0.629277  | 27 | 6 | 0 | 1.188474  | -5.216491 | 3.187042  |
| 186 | 1 | 0 | -1.065184 | -1.172072 | 0.931137  | 28 | 6 | 0 | 1.904492  | -5.104834 | 1.853869  |
| 187 | 1 | 0 | -0.021870 | 0.657366  | 2.282439  | 29 | 6 | 0 | 1.255729  | -4.021632 | 1.002946  |
| 188 | 1 | 0 | -1.454852 | 1.635257  | 2.055260  | 30 | 6 | 0 | 2.034982  | -3.784552 | -0.267467 |
| 189 | 1 | 0 | -1.331856 | 0.455788  | 4.266997  | 31 | 6 | 0 | -3.701101 | -0.605096 | 3.899335  |
| 190 | 1 | 0 | -1.383897 | -1.083857 | 3.452906  | 32 | 6 | 0 | -2.946117 | -1.440477 | 4.922106  |
| 191 | 1 | 0 | -3.589459 | 1.018109  | 3.499564  | 33 | 6 | 0 | -1.711232 | -2.054235 | 4.286943  |
| 192 | 1 | 0 | -3.667878 | -0.423833 | 2.514649  | 34 | 6 | 0 | -2.091903 | -2.783252 | 3.017970  |
| 193 | 1 | 0 | -4.918301 | -0.875319 | 4.500182  | 35 | 6 | 0 | -2.724945 | -1.790501 | 2.052709  |
| 194 | 1 | 0 | -3.459418 | -1.837091 | 4.556709  | 36 | 6 | 0 | -3.115131 | -2.348517 | 0.687309  |
| 195 | 1 | 0 | -3.849102 | 0.806956  | 6.046874  | 37 | 6 | 0 | -2.942040 | 4.577034  | 3.039934  |
| 196 | 1 | 0 | -3.994124 | -0.782133 | 6.781698  | 38 | 6 | 0 | -2.275141 | 4.078287  | 4.312152  |
| 197 | 1 | 0 | -2.441263 | -0.237515 | 6.180318  | 39 | 6 | 0 | -2.022626 | 2.585951  | 4.186808  |
| 198 | 1 | 0 | 6.234520  | -1.479396 | -0.785367 | 40 | 6 | 0 | -3.284598 | 1.844335  | 3.818308  |
| 199 | 6 | 0 | 5.905151  | -0.166171 | -2.277119 | 41 | 6 | 0 | -3.893995 | 2.408569  | 2.549000  |
| 200 | 8 | 0 | 5.727317  | 1.013798  | -2.584620 | 42 | 6 | 0 | -5.255810 | 1.835784  | 2.203373  |
| 201 | 6 | 0 | 5.798552  | -1.273150 | -3.322458 | 43 | 8 | 0 | 0.759897  | 4.982462  | 2.409490  |
| 202 | 1 | 0 | 6.176806  | -0.833975 | -4.237126 | 44 | 8 | 0 | -0.912567 | 7.089633  | -0.070137 |
| 203 | 1 | 0 | 6.460397  | -2.079344 | -3.039438 | 45 | 8 | 0 | -1.970893 | 4.364560  | 2.041642  |
| 204 | 1 | 0 | 4.271711  | -4.808679 | -2.349277 | 46 | 8 | 0 | -0.280449 | 3.656640  | -0.039625 |
| 205 | 8 | 0 | 2.269050  | -4.431099 | -2.419481 | 47 | 8 | 0 | 6.300391  | 3.879454  | 1.846675  |
| 206 | 8 | 0 | 2.153086  | -5.855025 | -2.772248 | 48 | 8 | 0 | 3.591743  | 4.709662  | 2.160032  |
| 207 | 1 | 0 | 2.054656  | -6.232030 | -1.875103 | 49 | 8 | 0 | 1.902679  | 3.863579  | 0.127381  |

**(2R,5R)-4a-OOH (excluded)**

| Center Number | Atomic Number | Atomic Type | Coordinates (Angstroms) |          |           |
|---------------|---------------|-------------|-------------------------|----------|-----------|
|               |               |             | X                       | Y        | Z         |
| 1             | 6             | 0           | 0.732251                | 4.630926 | -0.014190 |
| 2             | 6             | 0           | 0.547673                | 5.605510 | 1.142390  |

|     |   |   |           |           |           |     |   |   |           |           |           |
|-----|---|---|-----------|-----------|-----------|-----|---|---|-----------|-----------|-----------|
| 59  | 8 | 0 | 3.367323  | -3.452949 | 0.223009  | 115 | 1 | 0 | 5.352684  | -5.134102 | -3.563107 |
| 60  | 8 | 0 | 3.355371  | -4.803070 | -3.018577 | 116 | 1 | 0 | -1.844172 | -4.925897 | 1.591763  |
| 61  | 8 | 0 | -1.107505 | -5.510151 | 4.069094  | 117 | 1 | 0 | -0.308326 | -6.571004 | 2.538566  |
| 62  | 8 | 0 | 1.764910  | -6.279103 | 3.952186  | 118 | 1 | 0 | 1.246624  | -4.267246 | 3.703652  |
| 63  | 8 | 0 | 3.289372  | -4.793328 | 2.110361  | 119 | 1 | 0 | 1.836545  | -6.051573 | 1.329410  |
| 64  | 8 | 0 | -0.076608 | -4.488031 | 0.700590  | 120 | 1 | 0 | 1.208579  | -3.098520 | 1.556704  |
| 65  | 8 | 0 | 1.556810  | -2.741584 | -1.054307 | 121 | 1 | 0 | 2.096140  | -4.642062 | -0.911190 |
| 66  | 8 | 0 | -2.566260 | -0.663547 | 6.059833  | 122 | 1 | 0 | 4.398020  | -3.159618 | -1.515655 |
| 67  | 8 | 0 | -1.121253 | -3.003030 | 5.200693  | 123 | 1 | 0 | -4.656852 | -0.284769 | 4.280523  |
| 68  | 8 | 0 | -0.879373 | -3.301519 | 2.459970  | 124 | 1 | 0 | -3.581871 | -2.237929 | 5.275705  |
| 69  | 8 | 0 | -3.946382 | -1.343300 | 2.710377  | 125 | 1 | 0 | -1.002804 | -1.275536 | 4.045374  |
| 70  | 8 | 0 | -2.000430 | -2.346597 | -0.227412 | 126 | 1 | 0 | -2.779481 | -3.585384 | 3.246323  |
| 71  | 8 | 0 | -1.046413 | 4.759025  | 4.555416  | 127 | 1 | 0 | -2.067197 | -0.952642 | 1.894493  |
| 72  | 8 | 0 | -1.593834 | 2.041297  | 5.454361  | 128 | 1 | 0 | -3.851066 | -1.684772 | 0.267931  |
| 73  | 8 | 0 | -2.856945 | 0.492303  | 3.604078  | 129 | 1 | 0 | -3.561194 | -3.332144 | 0.784465  |
| 74  | 8 | 0 | -4.122863 | 3.831194  | 2.765960  | 130 | 1 | 0 | -3.237596 | 5.612057  | 3.113272  |
| 75  | 8 | 0 | -5.772482 | 2.499635  | 1.039599  | 131 | 1 | 0 | -2.923421 | 4.258367  | 5.156395  |
| 76  | 7 | 0 | -0.962171 | 3.966091  | -2.667870 | 132 | 1 | 0 | -1.280769 | 2.414574  | 3.421903  |
| 77  | 8 | 0 | 2.890444  | 3.334688  | -3.773032 | 133 | 1 | 0 | -3.985100 | 1.899734  | 4.642981  |
| 78  | 6 | 0 | -0.311037 | 0.507502  | -3.996713 | 134 | 1 | 0 | -3.213169 | 2.269942  | 1.727144  |
| 79  | 6 | 0 | 0.223187  | -0.019327 | -5.352076 | 135 | 1 | 0 | -5.921371 | 1.961507  | 3.050803  |
| 80  | 6 | 0 | 0.596949  | -1.479361 | -5.017325 | 136 | 1 | 0 | -5.166555 | 0.790502  | 1.959700  |
| 81  | 6 | 0 | 1.273396  | -1.327734 | -3.663448 | 137 | 1 | 0 | 1.697259  | 4.705799  | 2.466337  |
| 82  | 7 | 0 | 0.576079  | -0.221650 | -3.074467 | 138 | 1 | 0 | -0.530262 | 7.953853  | 0.128957  |
| 83  | 8 | 0 | 0.597392  | -0.024425 | -1.747228 | 139 | 1 | 0 | 6.605491  | 2.952758  | 1.764483  |
| 84  | 6 | 0 | -1.783698 | 0.073653  | -3.935575 | 140 | 1 | 0 | 4.261680  | 4.631055  | 2.856458  |
| 85  | 8 | 0 | -2.522380 | 0.514966  | -4.810759 | 141 | 1 | 0 | 7.246647  | -1.969150 | 1.537758  |
| 86  | 7 | 0 | -2.159090 | -0.829128 | -3.027336 | 142 | 1 | 0 | 7.779171  | 0.794405  | 2.313982  |
| 87  | 6 | 0 | -3.576441 | -1.205381 | -2.927316 | 143 | 1 | 0 | 3.908061  | 0.476886  | -3.324522 |
| 88  | 1 | 0 | 0.738922  | 5.207785  | -0.926084 | 144 | 1 | 0 | 4.927397  | -2.245213 | 1.103499  |
| 89  | 1 | 0 | 1.251136  | 6.422692  | 1.012943  | 145 | 1 | 0 | 6.796704  | -6.407226 | 0.312573  |
| 90  | 1 | 0 | -1.068432 | 6.722268  | 1.995558  | 146 | 1 | 0 | 3.192205  | -3.987710 | -3.515362 |
| 91  | 1 | 0 | -2.891489 | 5.632402  | 0.650838  | 147 | 1 | 0 | -0.986460 | -4.682596 | 4.576145  |
| 92  | 1 | 0 | -2.230045 | 3.286483  | -0.168625 | 148 | 1 | 0 | 2.700795  | -6.084414 | 4.101134  |
| 93  | 1 | 0 | -1.466438 | 5.742765  | -1.741786 | 149 | 1 | 0 | 1.408048  | -1.901123 | -0.596542 |
| 94  | 1 | 0 | -2.818283 | 4.645569  | -1.960744 | 150 | 1 | 0 | -2.168879 | 0.192429  | 5.799234  |
| 95  | 1 | 0 | 6.934390  | 3.801656  | -0.835881 | 151 | 1 | 0 | -1.096062 | -2.619365 | 6.089827  |
| 96  | 1 | 0 | 5.645643  | 5.353781  | 0.602895  | 152 | 1 | 0 | -1.339169 | -3.025941 | -0.023597 |
| 97  | 1 | 0 | 3.934668  | 2.925662  | 1.142341  | 153 | 1 | 0 | -0.473037 | 4.765936  | 3.756014  |
| 98  | 1 | 0 | 3.186807  | 5.486946  | -0.248451 | 154 | 1 | 0 | -0.890265 | 2.596310  | 5.821187  |
| 99  | 1 | 0 | 3.532099  | 2.689664  | -1.376151 | 155 | 1 | 0 | -5.736223 | 3.453768  | 1.194990  |
| 100 | 1 | 0 | 3.491186  | 5.182763  | -3.010055 | 156 | 1 | 0 | 1.112748  | 0.532574  | -5.628007 |
| 101 | 1 | 0 | 1.954696  | 4.537472  | -2.446079 | 157 | 1 | 0 | -0.533777 | 0.079630  | -6.110853 |
| 102 | 1 | 0 | 8.524910  | -2.034542 | -1.317690 | 158 | 1 | 0 | 1.239447  | -1.949409 | -5.743946 |
| 103 | 1 | 0 | 8.983275  | -0.169020 | 0.161068  | 159 | 1 | 0 | -0.298406 | -2.072931 | -4.892268 |
| 104 | 1 | 0 | 6.047884  | -0.043424 | 0.828322  | 160 | 1 | 0 | 3.584105  | 2.648820  | -3.684845 |
| 105 | 1 | 0 | 7.627068  | 1.749256  | -1.016076 | 161 | 1 | 0 | -1.610668 | -1.005534 | -2.210626 |
| 106 | 1 | 0 | 5.412246  | -0.270857 | -1.472803 | 162 | 1 | 0 | -3.927738 | -1.478829 | -3.912678 |
| 107 | 1 | 0 | 6.178360  | 0.293291  | -3.931232 | 163 | 1 | 0 | -0.348755 | 4.471428  | -3.267990 |
| 108 | 1 | 0 | 6.383136  | 1.915796  | -3.278474 | 164 | 6 | 0 | -1.061471 | 2.621473  | -2.794001 |
| 109 | 1 | 0 | 4.001395  | -5.417463 | 0.286482  | 165 | 8 | 0 | -1.825664 | 1.960598  | -2.110206 |
| 110 | 1 | 0 | 5.700396  | -4.743982 | 2.096216  | 166 | 6 | 0 | -0.216322 | 2.029499  | -3.909168 |
| 111 | 1 | 0 | 7.418615  | -4.251637 | 0.568718  | 167 | 1 | 0 | -0.620093 | 2.420577  | -4.836833 |
| 112 | 1 | 0 | 7.320963  | -3.863930 | -1.705086 | 168 | 1 | 0 | 0.817111  | 2.345682  | -3.822020 |
| 113 | 1 | 0 | 5.446940  | -2.853975 | -2.864085 | 169 | 1 | 0 | -3.616743 | -2.069518 | -2.282064 |
| 114 | 1 | 0 | 4.859708  | -5.696856 | -1.985242 | 170 | 6 | 0 | -4.447362 | -0.061586 | -2.374138 |



|     |   |   |            |           |           |    |   |   |           |           |           |
|-----|---|---|------------|-----------|-----------|----|---|---|-----------|-----------|-----------|
| 171 | 1 | 0 | -4.027254  | 0.286698  | -1.438387 | 14 | 6 | 0 | 0.306537  | -6.119556 | -1.747591 |
| 172 | 1 | 0 | -4.397468  | 0.761173  | -3.074039 | 15 | 6 | 0 | -0.291163 | -4.839136 | -2.294086 |
| 173 | 6 | 0 | -5.910099  | -0.499299 | -2.174176 | 16 | 6 | 0 | -1.763578 | -4.711786 | -1.965909 |
| 174 | 1 | 0 | -6.277941  | -0.946430 | -3.092689 | 17 | 6 | 0 | -1.910363 | -4.753290 | -0.443666 |
| 175 | 1 | 0 | -5.958590  | -1.264568 | -1.401811 | 18 | 6 | 0 | -3.327314 | -4.794061 | 0.122649  |
| 176 | 6 | 0 | -6.813951  | 0.684471  | -1.771583 | 19 | 6 | 0 | 4.483976  | -3.641452 | 0.957975  |
| 177 | 1 | 0 | -6.833873  | 1.400802  | -2.589301 | 20 | 6 | 0 | 3.789144  | -4.678720 | 0.104004  |
| 178 | 1 | 0 | -6.387868  | 1.191631  | -0.913347 | 21 | 6 | 0 | 3.042739  | -5.779578 | 0.882725  |
| 179 | 6 | 0 | -8.260320  | 0.263525  | -1.434260 | 22 | 6 | 0 | 1.654252  | -5.501883 | 1.497255  |
| 180 | 1 | 0 | -8.232936  | -0.488375 | -0.652168 | 23 | 6 | 0 | 1.444195  | -4.393624 | 2.530866  |
| 181 | 1 | 0 | -8.788423  | 1.123972  | -1.031567 | 24 | 6 | 0 | 2.214519  | -4.598546 | 3.862076  |
| 182 | 6 | 0 | -9.045389  | -0.266355 | -2.651358 | 25 | 6 | 0 | 6.498056  | 0.909799  | 1.275602  |
| 183 | 1 | 0 | -8.976744  | 0.469668  | -3.447964 | 26 | 6 | 0 | 7.454156  | 0.165160  | 0.343786  |
| 184 | 1 | 0 | -8.588554  | -1.178734 | -3.020358 | 27 | 6 | 0 | 6.768052  | -1.035357 | -0.307323 |
| 185 | 6 | 0 | -10.536589 | -0.537851 | -2.353651 | 28 | 6 | 0 | 6.032035  | -1.832700 | 0.757865  |
| 186 | 1 | 0 | -10.982932 | 0.353805  | -1.920773 | 29 | 6 | 0 | 5.003197  | -0.929785 | 1.425314  |
| 187 | 1 | 0 | -11.047243 | -0.729331 | -3.291344 | 30 | 6 | 0 | 4.057729  | -1.707008 | 2.315315  |
| 188 | 6 | 0 | -10.761253 | -1.728993 | -1.400604 | 31 | 6 | 0 | 3.584256  | 5.220377  | 0.065910  |
| 189 | 1 | 0 | -10.251628 | -1.535160 | -0.463433 | 32 | 6 | 0 | 4.710014  | 4.879871  | -0.896942 |
| 190 | 1 | 0 | -10.312736 | -2.620625 | -1.831084 | 33 | 6 | 0 | 4.994284  | 3.390351  | -0.854971 |
| 191 | 6 | 0 | -12.251410 | -2.003220 | -1.102164 | 34 | 6 | 0 | 5.244327  | 2.939513  | 0.569614  |
| 192 | 1 | 0 | -12.320435 | -2.728793 | -0.296053 | 35 | 6 | 0 | 3.999516  | 3.246112  | 1.403563  |
| 193 | 1 | 0 | -12.719855 | -1.088457 | -0.748576 | 36 | 6 | 0 | 4.046109  | 2.927012  | 2.893833  |
| 194 | 6 | 0 | -13.036993 | -2.544048 | -2.312864 | 37 | 6 | 0 | -1.479654 | 5.817580  | -1.416392 |
| 195 | 1 | 0 | -13.024471 | -1.817992 | -3.118420 | 38 | 6 | 0 | -0.478870 | 5.663347  | -2.551846 |
| 196 | 1 | 0 | -12.549470 | -3.443251 | -2.680291 | 39 | 6 | 0 | 0.728656  | 4.870838  | -2.078538 |
| 197 | 6 | 0 | -14.500991 | -2.871482 | -1.960619 | 40 | 6 | 0 | 1.291342  | 5.466732  | -0.808386 |
| 198 | 1 | 0 | -14.521073 | -3.604474 | -1.159756 | 41 | 6 | 0 | 0.205505  | 5.480135  | 0.258477  |
| 199 | 1 | 0 | -14.988003 | -1.975114 | -1.588397 | 42 | 6 | 0 | 0.639602  | 6.042127  | 1.591571  |
| 200 | 6 | 0 | -15.280852 | -3.414021 | -3.173960 | 43 | 8 | 0 | -2.103274 | 2.605792  | -3.216158 |
| 201 | 1 | 0 | -15.290334 | -2.685042 | -3.977504 | 44 | 8 | 0 | -5.368777 | 3.984140  | -2.343191 |
| 202 | 1 | 0 | -14.819950 | -4.322395 | -3.547603 | 45 | 8 | 0 | -1.996925 | 4.525904  | -1.151229 |
| 203 | 1 | 0 | -16.308274 | -3.639727 | -2.909614 | 46 | 8 | 0 | -3.236133 | 1.991953  | -0.512846 |
| 204 | 1 | 0 | 1.322510   | -2.172487 | -3.011449 | 47 | 8 | 0 | -1.098827 | -2.575225 | -5.030586 |
| 205 | 8 | 0 | 2.685452   | -0.877866 | -3.885701 | 48 | 8 | 0 | -1.703451 | 0.120109  | -4.407917 |
| 206 | 8 | 0 | 3.394577   | -2.076505 | -4.340459 | 49 | 8 | 0 | -3.147253 | 0.357754  | -1.983608 |
| 207 | 1 | 0 | 3.627919   | -1.842158 | -5.253538 | 50 | 8 | 0 | -4.287284 | -2.860197 | -3.240646 |

**(2R,5R)-4a-OOH (included)**

| Center Number | Atomic Number | Atomic Type | Coordinates (Angstroms) |           |           |
|---------------|---------------|-------------|-------------------------|-----------|-----------|
|               |               |             | X                       | Y         | Z         |
| 51            | 8             | 0           | 1.702814                | -6.151096 | -2.046469 |
| 52            | 8             | 0           | -0.150176               | -4.812595 | -3.732357 |
| 53            | 8             | 0           | -2.170769               | -3.438834 | -2.474980 |
| 54            | 8             | 0           | -1.357560               | -6.029150 | -0.024647 |
| 55            | 8             | 0           | -3.994524               | -3.512910 | 0.106914  |
| 56            | 8             | 0           | 2.935783                | -4.047979 | -0.863190 |
| 57            | 8             | 0           | 3.911482                | -6.260840 | 1.930182  |
| 58            | 8             | 0           | 0.781256                | -5.179639 | 0.375133  |
| 59            | 8             | 0           | 3.526707                | -2.697535 | 1.401296  |
| 60            | 8             | 0           | 2.923984                | -3.414311 | 4.290225  |
| 61            | 8             | 0           | 7.986767                | 1.101381  | -0.580539 |
| 62            | 8             | 0           | 7.789199                | -1.850608 | -0.889211 |
| 63            | 8             | 0           | 5.425097                | -2.969217 | 0.116505  |
| 64            | 8             | 0           | 5.815152                | 0.018164  | 2.173030  |
| 65            | 8             | 0           | 2.947233                | -0.996571 | 2.791728  |
| 66            | 8             | 0           | 4.428303                | 5.285524  | -2.233979 |
| 67            | 8             | 0           | 6.185068                | 3.103878  | -1.610317 |
| 68            | 8             | 0           | 5.519711                | 1.534808  | 0.469626  |
| 69            | 8             | 0           | 3.862739                | 4.695394  | 1.355868  |

|     |   |   |           |           |           |     |   |   |           |           |           |
|-----|---|---|-----------|-----------|-----------|-----|---|---|-----------|-----------|-----------|
| 70  | 8 | 0 | 3.918772  | 1.519149  | 3.156547  | 126 | 1 | 0 | 0.377545  | -4.366719 | 2.717323  |
| 71  | 8 | 0 | -1.060348 | 5.040430  | -3.694848 | 127 | 1 | 0 | 2.969179  | -5.353770 | 3.746204  |
| 72  | 8 | 0 | 1.772468  | 4.933928  | -3.075588 | 128 | 1 | 0 | 1.522928  | -4.914872 | 4.634083  |
| 73  | 8 | 0 | 2.397473  | 4.629323  | -0.434016 | 129 | 1 | 0 | 7.033314  | 1.622123  | 1.882191  |
| 74  | 8 | 0 | -0.835696 | 6.344022  | -0.268718 | 130 | 1 | 0 | 8.279891  | -0.219949 | 0.920835  |
| 75  | 8 | 0 | -0.399337 | 5.675251  | 2.523659  | 131 | 1 | 0 | 6.051397  | -0.696788 | -1.044829 |
| 76  | 7 | 0 | -5.375397 | 2.149059  | 1.454738  | 132 | 1 | 0 | 6.732918  | -2.170863 | 1.511743  |
| 77  | 8 | 0 | -6.198254 | -2.508310 | -1.141261 | 133 | 1 | 0 | 4.413267  | -0.406883 | 0.694626  |
| 78  | 6 | 0 | -4.734347 | -0.220716 | 3.780825  | 134 | 1 | 0 | 4.568254  | -2.213151 | 3.114926  |
| 79  | 6 | 0 | -5.682017 | -1.228941 | 4.479504  | 135 | 1 | 0 | 1.735334  | -3.455985 | 2.100436  |
| 80  | 6 | 0 | -6.625229 | -1.721961 | 3.352633  | 136 | 1 | 0 | 3.475290  | 6.286977  | 0.178305  |
| 81  | 6 | 0 | -5.814148 | -1.550821 | 2.054721  | 137 | 1 | 0 | 5.602824  | 5.401896  | -0.586042 |
| 82  | 7 | 0 | -4.606180 | -0.861814 | 2.454572  | 138 | 1 | 0 | 4.148062  | 2.846533  | -1.250469 |
| 83  | 8 | 0 | -3.427917 | -1.213441 | 1.927827  | 139 | 1 | 0 | 6.100324  | 3.464281  | 0.975924  |
| 84  | 6 | 0 | -3.372402 | -0.225564 | 4.505176  | 140 | 1 | 0 | 3.136349  | 2.774625  | 0.965467  |
| 85  | 8 | 0 | -2.920887 | -1.299266 | 4.881171  | 141 | 1 | 0 | 3.201705  | 3.414174  | 3.350407  |
| 86  | 7 | 0 | -2.796305 | 0.956702  | 4.741165  | 142 | 1 | 0 | 4.951359  | 3.329265  | 3.333718  |
| 87  | 6 | 0 | -1.575380 | 1.041047  | 5.557802  | 143 | 1 | 0 | -2.263251 | 6.511400  | -1.678499 |
| 88  | 6 | 0 | -0.517958 | 2.001553  | 4.988190  | 144 | 1 | 0 | -0.143503 | 6.644730  | -2.853016 |
| 89  | 6 | 0 | 0.081841  | 1.552427  | 3.634176  | 145 | 1 | 0 | 0.439919  | 3.846523  | -1.892705 |
| 90  | 6 | 0 | -0.715208 | 2.083603  | 2.427533  | 146 | 1 | 0 | 1.632007  | 6.475557  | -1.007027 |
| 91  | 6 | 0 | -0.111486 | 1.697352  | 1.063601  | 147 | 1 | 0 | -0.180048 | 4.488234  | 0.408012  |
| 92  | 6 | 0 | 0.020880  | 0.172639  | 0.861500  | 148 | 1 | 0 | 0.738767  | 7.117496  | 1.505384  |
| 93  | 6 | 0 | 0.177480  | -0.200982 | -0.626927 | 149 | 1 | 0 | 1.586259  | 5.604676  | 1.876145  |
| 94  | 6 | 0 | 1.444667  | 0.392964  | -1.275799 | 150 | 1 | 0 | -1.825732 | 1.736891  | -3.579685 |
| 95  | 6 | 0 | 1.644555  | -0.043611 | -2.745709 | 151 | 1 | 0 | -5.781088 | 4.187641  | -3.192174 |
| 96  | 6 | 0 | 2.106544  | -1.507663 | -2.875554 | 152 | 1 | 0 | -0.703793 | -3.341319 | -4.564618 |
| 97  | 6 | 0 | 2.234892  | -1.999424 | -4.332782 | 153 | 1 | 0 | -0.976905 | -0.198442 | -4.964081 |
| 98  | 6 | 0 | 3.311225  | -1.249213 | -5.141145 | 154 | 1 | 0 | 2.138244  | -5.342153 | -1.692799 |
| 99  | 8 | 0 | -6.492956 | -0.679826 | 1.111131  | 155 | 1 | 0 | 0.725552  | -5.152789 | -3.972009 |
| 100 | 8 | 0 | -7.676611 | -1.432489 | 0.683856  | 156 | 1 | 0 | -3.569830 | -2.839684 | 0.666404  |
| 101 | 1 | 0 | -4.857598 | 1.483766  | -1.680871 | 157 | 1 | 0 | 2.432302  | -3.341464 | -0.432951 |
| 102 | 1 | 0 | -4.088037 | 2.319849  | -3.728795 | 158 | 1 | 0 | 4.442830  | -7.014861 | 1.645104  |
| 103 | 1 | 0 | -3.556789 | 4.712392  | -3.137799 | 159 | 1 | 0 | 2.426566  | -2.603454 | 4.110390  |
| 104 | 1 | 0 | -3.892755 | 5.274547  | -0.718345 | 160 | 1 | 0 | 7.291775  | 1.637573  | -1.008854 |
| 105 | 1 | 0 | -3.002804 | 3.449606  | 0.846311  | 161 | 1 | 0 | 7.377047  | -2.633051 | -1.281738 |
| 106 | 1 | 0 | -5.800116 | 3.174757  | -0.293533 | 162 | 1 | 0 | 3.082456  | -0.030559 | 2.902768  |
| 107 | 1 | 0 | -5.273140 | 4.180019  | 1.035825  | 163 | 1 | 0 | 3.513827  | 5.063288  | -2.512028 |
| 108 | 1 | 0 | -3.115428 | -4.247490 | -4.139937 | 164 | 1 | 0 | 6.150420  | 3.577899  | -2.454447 |
| 109 | 1 | 0 | -3.053854 | -2.033856 | -5.323166 | 165 | 1 | 0 | 4.757599  | 1.040036  | 3.023791  |
| 110 | 1 | 0 | -1.555686 | -1.223479 | -2.834543 | 166 | 1 | 0 | -1.376984 | 4.129006  | -3.484960 |
| 111 | 1 | 0 | -4.152064 | -0.066491 | -3.793273 | 167 | 1 | 0 | 1.391757  | 4.788544  | -3.953807 |
| 112 | 1 | 0 | -3.662834 | -1.958300 | -1.495103 | 168 | 1 | 0 | -0.232670 | 6.045736  | 3.399350  |
| 113 | 1 | 0 | -6.292452 | -1.357454 | -2.841976 | 169 | 1 | 0 | -6.218921 | -0.778901 | 5.303045  |
| 114 | 1 | 0 | -5.722773 | -0.515920 | -1.391279 | 170 | 1 | 0 | -5.068302 | -2.036505 | 4.845201  |
| 115 | 1 | 0 | 0.286699  | -7.174386 | 0.141861  | 171 | 1 | 0 | -7.523398 | -1.130450 | 3.273691  |
| 116 | 1 | 0 | -0.152146 | -6.964744 | -2.237512 | 172 | 1 | 0 | -6.908330 | -2.753547 | 3.502202  |
| 117 | 1 | 0 | 0.222333  | -3.995443 | -1.860834 | 173 | 1 | 0 | -5.466001 | -3.035325 | -0.759057 |
| 118 | 1 | 0 | -2.325984 | -5.517233 | -2.420871 | 174 | 1 | 0 | -3.153383 | 1.803994  | 4.335449  |
| 119 | 1 | 0 | -1.348287 | -3.942054 | -0.005435 | 175 | 1 | 0 | -1.848168 | 1.363906  | 6.558357  |
| 120 | 1 | 0 | -3.251477 | -5.170465 | 1.132343  | 176 | 1 | 0 | -1.172500 | 0.043341  | 5.627400  |
| 121 | 1 | 0 | -3.945089 | -5.463552 | -0.453030 | 177 | 1 | 0 | 0.272070  | 2.060138  | 5.731901  |
| 122 | 1 | 0 | 4.983356  | -4.103800 | 1.793027  | 178 | 1 | 0 | -0.938864 | 2.997802  | 4.891375  |
| 123 | 1 | 0 | 4.572746  | -5.163316 | -0.458814 | 179 | 1 | 0 | 1.104583  | 1.911437  | 3.562683  |
| 124 | 1 | 0 | 2.858354  | -6.561719 | 0.156363  | 180 | 1 | 0 | 0.130847  | 0.469565  | 3.608909  |
| 125 | 1 | 0 | 1.339796  | -6.447811 | 1.925969  | 181 | 1 | 0 | -0.766935 | 3.165533  | 2.500051  |

|     |   |   |           |           |           |    |   |   |           |           |           |
|-----|---|---|-----------|-----------|-----------|----|---|---|-----------|-----------|-----------|
| 182 | 1 | 0 | -1.727445 | 1.710027  | 2.469866  | 25 | 6 | 0 | -3.474136 | 4.916057  | -1.291925 |
| 183 | 1 | 0 | -0.765408 | 2.084159  | 0.288816  | 26 | 6 | 0 | -2.766509 | 4.536537  | -2.584608 |
| 184 | 1 | 0 | 0.858836  | 2.172234  | 0.951140  | 27 | 6 | 0 | -1.598545 | 3.645648  | -2.232418 |
| 185 | 1 | 0 | 0.859650  | -0.220169 | 1.426183  | 28 | 6 | 0 | -0.620196 | 4.358357  | -1.327160 |
| 186 | 1 | 0 | -0.882506 | -0.298390 | 1.238262  | 29 | 6 | 0 | -1.331638 | 4.886557  | -0.080820 |
| 187 | 1 | 0 | 0.203403  | -1.284548 | -0.711723 | 30 | 6 | 0 | -0.555313 | 5.927378  | 0.708753  |
| 188 | 1 | 0 | -0.701105 | 0.146231  | -1.157902 | 31 | 6 | 0 | -7.646399 | 1.993431  | 0.353434  |
| 189 | 1 | 0 | 1.381046  | 1.474978  | -1.240716 | 32 | 6 | 0 | -7.582505 | 2.760835  | -0.957868 |
| 190 | 1 | 0 | 2.318682  | 0.104835  | -0.695637 | 33 | 6 | 0 | -6.140170 | 2.933939  | -1.396666 |
| 191 | 1 | 0 | 2.383372  | 0.604000  | -3.206037 | 34 | 6 | 0 | -5.350281 | 3.616939  | -0.297074 |
| 192 | 1 | 0 | 0.711703  | 0.095761  | -3.284187 | 35 | 6 | 0 | -5.450508 | 2.761527  | 0.966882  |
| 193 | 1 | 0 | 3.057403  | -1.636475 | -2.367072 | 36 | 6 | 0 | -4.641110 | 3.307428  | 2.133665  |
| 194 | 1 | 0 | 1.391863  | -2.146830 | -2.371333 | 37 | 6 | 0 | -6.783192 | -3.255350 | 0.785916  |
| 195 | 1 | 0 | 2.493232  | -3.055056 | -4.312838 | 38 | 6 | 0 | -7.472040 | -2.856430 | -0.503626 |
| 196 | 1 | 0 | 1.271269  | -1.917441 | -4.820881 | 39 | 6 | 0 | -7.214557 | -1.389572 | -0.746740 |
| 197 | 1 | 0 | 4.271655  | -1.305758 | -4.639158 | 40 | 6 | 0 | -7.674361 | -0.533904 | 0.417850  |
| 198 | 1 | 0 | 3.420592  | -1.684089 | -6.128953 | 41 | 6 | 0 | -7.146806 | -1.039366 | 1.757913  |
| 199 | 1 | 0 | 3.055237  | -0.203938 | -5.265877 | 42 | 6 | 0 | -7.956118 | -0.515691 | 2.949180  |
| 200 | 1 | 0 | -5.565335 | -2.468268 | 1.560453  | 43 | 8 | 0 | -3.883677 | -4.438483 | -1.284405 |
| 201 | 1 | 0 | -7.272985 | -1.925246 | -0.090128 | 44 | 8 | 0 | -2.995341 | -5.254004 | 2.167655  |
| 202 | 1 | 0 | -5.909069 | 1.357374  | 1.150264  | 45 | 8 | 0 | -5.406972 | -2.995319 | 0.590637  |
| 203 | 6 | 0 | -4.881967 | 2.153626  | 2.697639  | 46 | 8 | 0 | -2.668373 | -2.371832 | 0.340861  |
| 204 | 8 | 0 | -4.052560 | 2.979501  | 3.088069  | 47 | 8 | 0 | 0.837599  | -3.692902 | -5.276160 |
| 205 | 6 | 0 | -5.467090 | 1.125333  | 3.651237  | 48 | 8 | 0 | -1.721722 | -4.031478 | -3.791159 |
| 206 | 1 | 0 | -5.501770 | 1.587340  | 4.628363  | 49 | 8 | 0 | -1.294883 | -3.357019 | -1.086434 |
| 207 | 1 | 0 | -6.477468 | 0.913869  | 3.336034  | 50 | 8 | 0 | 1.830600  | -5.043235 | -2.043199 |

**(2S,5S)-4b-OOH (excluded)**

| Center Number | Atomic Number | Atomic Type | Coordinates (Angstroms) |           |           |
|---------------|---------------|-------------|-------------------------|-----------|-----------|
|               |               |             | X                       | Y         | Z         |
| 1             | 6             | 0           | -2.031675               | -3.628588 | 0.069617  |
| 2             | 6             | 0           | -3.103983               | -4.688706 | -0.118003 |
| 3             | 6             | 0           | -3.923656               | -4.769999 | 1.175328  |
| 4             | 6             | 0           | -4.453562               | -3.402757 | 1.608529  |
| 5             | 6             | 0           | -3.388416               | -2.307124 | 1.586147  |
| 6             | 6             | 0           | -2.404743               | -2.277159 | 2.763552  |
| 7             | 6             | 0           | 1.951797                | -4.277096 | -3.226440 |
| 8             | 6             | 0           | 0.660775                | -4.355922 | -4.028636 |
| 9             | 6             | 0           | -0.451224               | -3.762047 | -3.180561 |
| 10            | 6             | 0           | -0.487084               | -4.352032 | -1.769661 |
| 11            | 6             | 0           | 0.864661                | -4.504659 | -1.085877 |
| 12            | 6             | 0           | 0.884828                | -5.555038 | 0.016864  |
| 13            | 6             | 0           | 4.756649                | 0.332813  | -2.797019 |
| 14            | 6             | 0           | 3.990000                | 0.073070  | -4.084818 |
| 15            | 6             | 0           | 2.834392                | -0.873353 | -3.814921 |
| 16            | 6             | 0           | 3.315236                | -2.156252 | -3.172638 |
| 17            | 6             | 0           | 4.054814                | -1.820325 | -1.884863 |
| 18            | 6             | 0           | 4.745794                | -3.001466 | -1.223105 |
| 19            | 6             | 0           | 1.696644                | 3.574686  | -0.982458 |
| 20            | 6             | 0           | 2.225077                | 3.479840  | -2.406653 |
| 21            | 6             | 0           | 3.749579                | 3.374573  | -2.398362 |
| 22            | 6             | 0           | 4.271213                | 2.333137  | -1.402749 |
| 23            | 6             | 0           | 3.636130                | 2.454518  | -0.019743 |
| 24            | 6             | 0           | 4.129897                | 3.638240  | 0.829790  |

|     |   |   |           |           |           |     |   |   |           |           |           |
|-----|---|---|-----------|-----------|-----------|-----|---|---|-----------|-----------|-----------|
| 81  | 6 | 0 | 2.816215  | -3.503187 | 2.959581  | 137 | 1 | 0 | -1.185964 | 6.278330  | 1.512814  |
| 82  | 6 | 0 | 4.344394  | -3.329737 | 2.916696  | 138 | 1 | 0 | -0.306388 | 6.761213  | 0.065246  |
| 83  | 6 | 0 | 4.877528  | -2.451310 | 4.063695  | 139 | 1 | 0 | -8.633913 | 1.912363  | 0.764540  |
| 84  | 6 | 0 | 6.415429  | -2.318576 | 4.054515  | 140 | 1 | 0 | -8.039117 | 3.734002  | -0.839550 |
| 85  | 6 | 0 | 6.947230  | -1.515353 | 2.851253  | 141 | 1 | 0 | -5.715388 | 1.965298  | -1.603781 |
| 86  | 6 | 0 | 8.482174  | -1.380068 | 2.872317  | 142 | 1 | 0 | -5.756672 | 4.601437  | -0.105051 |
| 87  | 6 | 0 | 9.015474  | -0.588478 | 1.662029  | 143 | 1 | 0 | -5.093905 | 1.768127  | 0.756152  |
| 88  | 6 | 0 | 10.551481 | -0.460292 | 1.674642  | 144 | 1 | 0 | -4.966851 | 2.840676  | 3.048539  |
| 89  | 6 | 0 | 11.127426 | 0.264073  | 0.438106  | 145 | 1 | 0 | -4.760400 | 4.379692  | 2.224296  |
| 90  | 6 | 0 | 10.790066 | 1.767880  | 0.400351  | 146 | 1 | 0 | -6.968198 | -4.284429 | 1.044165  |
| 91  | 6 | 0 | 11.355119 | 2.491554  | -0.841252 | 147 | 1 | 0 | -8.535428 | -3.033271 | -0.409766 |
| 92  | 6 | 0 | -0.562247 | -0.729496 | 3.291614  | 148 | 1 | 0 | -6.152317 | -1.250185 | -0.866654 |
| 93  | 8 | 0 | -0.640084 | -0.957358 | 4.483618  | 149 | 1 | 0 | -8.751963 | -0.453495 | 0.418323  |
| 94  | 6 | 0 | -0.329718 | 1.537470  | 2.165195  | 150 | 1 | 0 | -6.104813 | -0.768060 | 1.814934  |
| 95  | 7 | 0 | 1.288826  | 0.839640  | 3.709280  | 151 | 1 | 0 | -7.405773 | -0.668645 | 3.868410  |
| 96  | 8 | 0 | 2.236062  | 0.152456  | 4.339665  | 152 | 1 | 0 | -8.863132 | -1.094610 | 2.992847  |
| 97  | 6 | 0 | 1.217257  | -0.330609 | 1.503532  | 153 | 1 | 0 | -4.620452 | -3.832871 | -1.108064 |
| 98  | 6 | 0 | 1.885370  | -1.694597 | 1.614316  | 154 | 1 | 0 | -3.433079 | -5.718446 | 2.892178  |
| 99  | 8 | 0 | 2.208256  | -2.254970 | 0.561303  | 155 | 1 | 0 | 1.189452  | -2.790865 | -5.154659 |
| 100 | 7 | 0 | 2.110644  | -2.217526 | 2.814003  | 156 | 1 | 0 | -2.424975 | -3.856138 | -3.143799 |
| 101 | 6 | 0 | 12.893754 | 2.590804  | -0.840727 | 157 | 1 | 0 | 2.755120  | 1.641003  | -4.141101 |
| 102 | 8 | 0 | 1.003425  | 2.381162  | 5.433472  | 158 | 1 | 0 | 2.115180  | -0.433350 | -5.616805 |
| 103 | 8 | 0 | 1.120535  | 3.826141  | 5.663224  | 159 | 1 | 0 | 6.101678  | -1.739520 | -0.591025 |
| 104 | 1 | 0 | -1.401450 | -3.909218 | 0.895758  | 160 | 1 | 0 | 0.701957  | 2.501397  | -3.221564 |
| 105 | 1 | 0 | -2.636084 | -5.651304 | -0.246567 | 161 | 1 | 0 | 5.073917  | 4.895278  | -2.347059 |
| 106 | 1 | 0 | -4.748504 | -5.454632 | 1.024032  | 162 | 1 | 0 | 2.303128  | 3.804223  | 1.573413  |
| 107 | 1 | 0 | -4.937927 | -3.448527 | 2.575549  | 163 | 1 | 0 | -4.508763 | 3.801692  | -3.274252 |
| 108 | 1 | 0 | -3.898800 | -1.358728 | 1.549389  | 164 | 1 | 0 | -1.540278 | 3.002154  | -4.099628 |
| 109 | 1 | 0 | -1.992829 | -3.253300 | 2.961954  | 165 | 1 | 0 | 1.114940  | 5.832292  | 1.842650  |
| 110 | 1 | 0 | -2.905045 | -1.931113 | 3.657851  | 166 | 1 | 0 | -9.167080 | 2.094678  | -2.029034 |
| 111 | 1 | 0 | 2.789848  | -4.660751 | -3.786911 | 167 | 1 | 0 | -6.743832 | 3.420807  | -3.224409 |
| 112 | 1 | 0 | 0.436420  | -5.388936 | -4.240832 | 168 | 1 | 0 | -3.063874 | 3.091742  | 0.990027  |
| 113 | 1 | 0 | -0.275047 | -2.704354 | -3.072993 | 169 | 1 | 0 | -7.152675 | -3.286608 | -2.405360 |
| 114 | 1 | 0 | -1.005060 | -5.300089 | -1.831441 | 170 | 1 | 0 | -7.829230 | -0.079262 | -2.113522 |
| 115 | 1 | 0 | 1.215305  | -3.558579 | -0.723431 | 171 | 1 | 0 | -7.621482 | 1.475060  | 2.820057  |
| 116 | 1 | 0 | 0.480071  | -6.483479 | -0.372249 | 172 | 1 | 0 | -1.264495 | -1.182508 | 1.401878  |
| 117 | 1 | 0 | 0.305279  | -5.240156 | 0.868455  | 173 | 1 | 0 | 2.801480  | -5.791924 | -0.295149 |
| 118 | 1 | 0 | 5.661273  | 0.892108  | -2.986710 | 174 | 1 | 0 | -0.985233 | 2.492984  | 4.007692  |
| 119 | 1 | 0 | 4.662225  | -0.387799 | -4.792632 | 175 | 1 | 0 | 1.970507  | 2.818869  | 3.669608  |
| 120 | 1 | 0 | 2.128151  | -0.393802 | -3.152805 | 176 | 1 | 0 | 2.509597  | -3.931271 | 3.905949  |
| 121 | 1 | 0 | 3.959310  | -2.689035 | -3.862385 | 177 | 1 | 0 | 2.515154  | -4.157071 | 2.156658  |
| 122 | 1 | 0 | 3.396021  | -1.349830 | -1.179696 | 178 | 1 | 0 | 4.615984  | -2.921982 | 1.953092  |
| 123 | 1 | 0 | 5.286614  | -3.576263 | -1.967769 | 179 | 1 | 0 | 4.792784  | -4.317514 | 2.989626  |
| 124 | 1 | 0 | 4.012807  | -3.613884 | -0.731717 | 180 | 1 | 0 | 4.431702  | -1.463945 | 4.008285  |
| 125 | 1 | 0 | 1.942859  | 4.541333  | -0.582871 | 181 | 1 | 0 | 4.568837  | -2.887334 | 5.011243  |
| 126 | 1 | 0 | 1.986837  | 4.403628  | -2.918620 | 182 | 1 | 0 | 6.736111  | -1.830738 | 4.971577  |
| 127 | 1 | 0 | 4.081726  | 3.116834  | -3.391217 | 183 | 1 | 0 | 6.859009  | -3.310965 | 4.046463  |
| 128 | 1 | 0 | 5.350173  | 2.420326  | -1.314942 | 184 | 1 | 0 | 6.642102  | -1.989842 | 1.927907  |
| 129 | 1 | 0 | 3.803018  | 1.529528  | 0.503979  | 185 | 1 | 0 | 6.503395  | -0.522207 | 2.871774  |
| 130 | 1 | 0 | 4.233578  | 4.519755  | 0.221425  | 186 | 1 | 0 | 8.792602  | -0.886061 | 3.789580  |
| 131 | 1 | 0 | 5.085108  | 3.395476  | 1.269932  | 187 | 1 | 0 | 8.927849  | -2.371194 | 2.872479  |
| 132 | 1 | 0 | -4.292672 | 5.595460  | -1.460512 | 188 | 1 | 0 | 8.708233  | -1.091267 | 0.748653  |
| 133 | 1 | 0 | -2.403057 | 5.452251  | -3.033221 | 189 | 1 | 0 | 8.560382  | 0.396677  | 1.660461  |
| 134 | 1 | 0 | -1.966846 | 2.764330  | -1.732702 | 190 | 1 | 0 | 10.862205 | 0.064074  | 2.574479  |
| 135 | 1 | 0 | -0.141920 | 5.160039  | -1.875838 | 191 | 1 | 0 | 10.977568 | -1.458294 | 1.724640  |
| 136 | 1 | 0 | -1.546283 | 4.057468  | 0.563883  | 192 | 1 | 0 | 12.204907 | 0.140334  | 0.435578  |

|     |   |   |           |           |           |    |   |   |           |           |           |
|-----|---|---|-----------|-----------|-----------|----|---|---|-----------|-----------|-----------|
| 193 | 1 | 0 | 10.747518 | -0.210883 | -0.462765 | 36 | 6 | 0 | 3.437709  | -4.952338 | -3.149233 |
| 194 | 1 | 0 | 9.712678  | 1.891429  | 0.413179  | 37 | 6 | 0 | -1.988639 | -4.850223 | 2.359054  |
| 195 | 1 | 0 | 11.177744 | 2.243577  | 1.297366  | 38 | 6 | 0 | -0.785143 | -4.776104 | 3.286316  |
| 196 | 1 | 0 | 11.024551 | 1.974732  | -1.737563 | 39 | 6 | 0 | 0.459697  | -4.421712 | 2.492992  |
| 197 | 1 | 0 | 10.942301 | 3.495400  | -0.880517 | 40 | 6 | 0 | 0.649341  | -5.414235 | 1.368860  |
| 198 | 1 | 0 | 0.148606  | 1.890606  | 1.262241  | 41 | 6 | 0 | -0.571803 | -5.370273 | 0.455590  |
| 199 | 1 | 0 | -1.368773 | 1.333566  | 1.966034  | 42 | 6 | 0 | -0.499564 | -6.380429 | -0.667306 |
| 200 | 1 | 0 | -0.175887 | 3.590301  | 2.880645  | 43 | 8 | 0 | -1.696393 | -1.377478 | 3.664974  |
| 201 | 1 | 0 | 0.576482  | -0.409244 | 0.635667  | 44 | 8 | 0 | -5.215105 | -2.329768 | 3.671288  |
| 202 | 1 | 0 | 1.976124  | 0.386690  | 1.225912  | 45 | 8 | 0 | -2.270442 | -3.527820 | 1.914173  |
| 203 | 1 | 0 | 13.239612 | 3.092050  | 0.057388  | 46 | 8 | 0 | -3.357324 | -0.727371 | 1.329393  |
| 204 | 1 | 0 | 13.352343 | 1.610586  | -0.880320 | 47 | 8 | 0 | -1.556335 | 5.232268  | 4.418862  |
| 205 | 1 | 0 | 13.242326 | 3.156408  | -1.698274 | 48 | 8 | 0 | -2.290553 | 2.542967  | 5.023334  |
| 206 | 1 | 0 | 1.983028  | -1.648953 | 3.625530  | 49 | 8 | 0 | -2.661821 | 0.888145  | 2.772028  |
| 207 | 1 | 0 | 1.771888  | 3.828951  | 6.383213  | 50 | 8 | 0 | -3.600639 | 4.227113  | 1.551833  |

**(2S,5S)-4b-OOH (included)**

Center Atomic Atomic Coordinates (Angstroms)  
Number Number Type X Y Z

| Center Number | Atomic Number | Atomic Type | Coordinates (Angstroms) |           |           |
|---------------|---------------|-------------|-------------------------|-----------|-----------|
|               |               |             | X                       | Y         | Z         |
| 1             | 6             | 0           | -3.540511               | -0.214556 | 2.637603  |
| 2             | 6             | 0           | -3.117229               | -1.201598 | 3.710847  |
| 3             | 6             | 0           | -3.795860               | -2.542350 | 3.498049  |
| 4             | 6             | 0           | -3.629764               | -3.066751 | 2.072360  |
| 5             | 6             | 0           | -3.938996               | -2.017472 | 1.001156  |
| 6             | 6             | 0           | -5.449622               | -1.906674 | 0.752916  |
| 7             | 6             | 0           | -2.632490               | 5.018080  | 2.222696  |
| 8             | 6             | 0           | -2.526439               | 4.513047  | 3.648746  |
| 9             | 6             | 0           | -2.193321               | 3.026982  | 3.673156  |
| 10            | 6             | 0           | -3.172846               | 2.234752  | 2.832158  |
| 11            | 6             | 0           | -3.253669               | 2.819383  | 1.430617  |
| 12            | 6             | 0           | -4.360100               | 2.253605  | 0.565953  |
| 13            | 6             | 0           | 2.141129                | 6.329102  | 0.183208  |
| 14            | 6             | 0           | 2.152426                | 5.910844  | 1.636635  |
| 15            | 6             | 0           | 0.909547                | 5.082978  | 1.894717  |
| 16            | 6             | 0           | -0.368543               | 5.832468  | 1.558904  |
| 17            | 6             | 0           | -0.296281               | 6.443571  | 0.152639  |
| 18            | 6             | 0           | -1.266811               | 7.588538  | -0.081865 |
| 19            | 6             | 0           | 3.649385                | 2.443930  | -2.263712 |
| 20            | 6             | 0           | 4.409381                | 3.417844  | -1.382172 |
| 21            | 6             | 0           | 4.101472                | 4.835749  | -1.859086 |
| 22            | 6             | 0           | 2.598655                | 5.104550  | -1.919722 |
| 23            | 6             | 0           | 1.807011                | 3.996226  | -2.612595 |
| 24            | 6             | 0           | 1.829683                | 4.040936  | -4.140101 |
| 25            | 6             | 0           | 5.854157                | -2.338019 | -2.251304 |
| 26            | 6             | 0           | 6.624534                | -1.249858 | -1.507542 |
| 27            | 6             | 0           | 5.621879                | -0.178992 | -1.110691 |
| 28            | 6             | 0           | 4.821918                | 0.288156  | -2.316508 |
| 29            | 6             | 0           | 4.149166                | -0.851315 | -3.056406 |
| 30            | 6             | 0           | 3.469352                | -0.454246 | -4.364988 |
| 31            | 6             | 0           | 2.852354                | -5.967514 | 0.350804  |
| 32            | 6             | 0           | 4.124065                | -5.509316 | 1.045470  |
| 33            | 6             | 0           | 4.472332                | -4.136492 | 0.510047  |
| 34            | 6             | 0           | 4.646165                | -4.168557 | -0.992182 |
| 35            | 6             | 0           | 3.363688                | -4.689139 | -1.646575 |

|    |   |   |           |           |           |
|----|---|---|-----------|-----------|-----------|
| 51 | 8 | 0 | 3.313498  | 5.157232  | 1.990646  |
| 52 | 8 | 0 | 0.860512  | 4.732871  | 3.295994  |
| 53 | 8 | 0 | -1.386173 | 4.818502  | 1.560932  |
| 54 | 8 | 0 | 0.982420  | 7.093646  | -0.075496 |
| 55 | 8 | 0 | -2.595640 | 7.100408  | 0.169943  |
| 56 | 8 | 0 | 4.005651  | 3.204904  | -0.011149 |
| 57 | 8 | 0 | 4.570272  | 4.957532  | -3.217503 |
| 58 | 8 | 0 | 2.135321  | 5.115490  | -0.550697 |
| 59 | 8 | 0 | 2.259038  | 2.709341  | -2.112887 |
| 60 | 8 | 0 | 1.041758  | 2.965330  | -4.659431 |
| 61 | 8 | 0 | 7.298893  | -1.839855 | -0.405188 |
| 62 | 8 | 0 | 6.296428  | 0.969452  | -0.562353 |
| 63 | 8 | 0 | 3.785136  | 1.132217  | -1.770379 |
| 64 | 8 | 0 | 5.189059  | -1.809614 | -3.406198 |
| 65 | 8 | 0 | 2.571931  | 0.665510  | -4.153281 |
| 66 | 8 | 0 | 4.016923  | -5.456189 | 2.464972  |
| 67 | 8 | 0 | 5.704541  | -3.666487 | 1.094643  |
| 68 | 8 | 0 | 4.863796  | -2.795824 | -1.351878 |
| 69 | 8 | 0 | 3.071913  | -5.986007 | -1.051966 |
| 70 | 8 | 0 | 3.326264  | -3.749943 | -3.918486 |
| 71 | 8 | 0 | -0.965813 | -3.854978 | 4.358507  |
| 72 | 8 | 0 | 1.610463  | -4.499864 | 3.361389  |
| 73 | 8 | 0 | 1.832464  | -5.025391 | 0.656691  |
| 74 | 8 | 0 | -1.709489 | -5.725768 | 1.282930  |
| 75 | 8 | 0 | -1.564159 | -6.049488 | -1.573499 |
| 76 | 8 | 0 | -4.381203 | 2.983879  | -0.681898 |
| 77 | 6 | 0 | -6.319942 | -0.598305 | -2.710993 |
| 78 | 6 | 0 | -6.507277 | -1.405855 | -4.015075 |
| 79 | 6 | 0 | -8.003092 | -1.861686 | -4.027761 |
| 80 | 6 | 0 | -8.589942 | -1.405623 | -2.697319 |
| 81 | 7 | 0 | -7.726768 | -0.311112 | -2.334979 |
| 82 | 8 | 0 | -8.019014 | 0.436544  | -1.255964 |
| 83 | 6 | 0 | -5.581119 | 0.730544  | -2.864969 |
| 84 | 6 | 0 | -1.878296 | 1.438069  | -3.330575 |
| 85 | 6 | 0 | -0.955501 | 1.161127  | -2.133821 |
| 86 | 6 | 0 | -1.276432 | -0.178178 | -1.442108 |
| 87 | 6 | 0 | -0.176873 | -0.647370 | -0.467268 |
| 88 | 6 | 0 | 0.150636  | 0.400696  | 0.614466  |
| 89 | 6 | 0 | 1.116580  | -0.118183 | 1.701283  |
| 90 | 6 | 0 | 2.447100  | -0.634358 | 1.122192  |
| 91 | 6 | 0 | 3.548452  | -0.862271 | 2.180771  |

|     |   |   |           |           |           |     |   |   |           |           |           |
|-----|---|---|-----------|-----------|-----------|-----|---|---|-----------|-----------|-----------|
| 92  | 6 | 0 | 4.166997  | 0.451866  | 2.701359  | 148 | 1 | 0 | 0.365176  | -3.427815 | 2.081203  |
| 93  | 6 | 0 | 5.451965  | 0.242553  | 3.532704  | 149 | 1 | 0 | 0.766028  | -6.408574 | 1.783587  |
| 94  | 6 | 0 | 6.620070  | -0.365811 | 2.726687  | 150 | 1 | 0 | -0.702345 | -4.383696 | 0.041951  |
| 95  | 7 | 0 | -5.770977 | -1.020361 | -0.361497 | 151 | 1 | 0 | -0.620669 | -7.371548 | -0.245118 |
| 96  | 6 | 0 | -5.687352 | -1.495274 | -1.629172 | 152 | 1 | 0 | 0.468184  | -6.305747 | -1.145976 |
| 97  | 8 | 0 | -5.159382 | -2.564754 | -1.875928 | 153 | 1 | 0 | -1.282994 | -0.523463 | 3.467901  |
| 98  | 8 | 0 | -3.867953 | -0.363123 | -4.139838 | 154 | 1 | 0 | -5.483759 | -2.403344 | 4.595815  |
| 99  | 6 | 0 | -4.155434 | 0.541734  | -3.364889 | 155 | 1 | 0 | -0.646728 | 5.042712  | 4.106925  |
| 100 | 7 | 0 | -3.287134 | 1.465233  | -2.925763 | 156 | 1 | 0 | -1.877288 | 3.195387  | 5.608292  |
| 101 | 6 | 0 | 7.936761  | -0.339566 | 3.526694  | 157 | 1 | 0 | 3.573347  | 4.525318  | 1.291545  |
| 102 | 8 | 0 | -8.368752 | -2.396298 | -1.646161 | 158 | 1 | 0 | 1.743432  | 4.456032  | 3.584964  |
| 103 | 8 | 0 | -9.096850 | -3.601479 | -2.047046 | 159 | 1 | 0 | -3.263214 | 7.757094  | -0.064286 |
| 104 | 1 | 0 | -4.565466 | 0.077641  | 2.806055  | 160 | 1 | 0 | 3.101131  | 2.853360  | -0.027349 |
| 105 | 1 | 0 | -3.409827 | -0.788902 | 4.668274  | 161 | 1 | 0 | 5.520212  | 5.126198  | -3.265086 |
| 106 | 1 | 0 | -3.399912 | -3.264164 | 4.197248  | 162 | 1 | 0 | 1.556817  | 2.139855  | -4.679182 |
| 107 | 1 | 0 | -4.309478 | -3.897431 | 1.940063  | 163 | 1 | 0 | 6.699608  | -2.375896 | 0.149879  |
| 108 | 1 | 0 | -3.461344 | -2.318250 | 0.085851  | 164 | 1 | 0 | 5.685182  | 1.462030  | 0.003486  |
| 109 | 1 | 0 | -5.956674 | -1.562655 | 1.636959  | 165 | 1 | 0 | 2.119300  | 0.602435  | -3.301498 |
| 110 | 1 | 0 | -5.813581 | -2.897728 | 0.517108  | 166 | 1 | 0 | 3.172608  | -5.053102 | 2.766186  |
| 111 | 1 | 0 | -2.945792 | 6.039535  | 2.155985  | 167 | 1 | 0 | 5.727569  | -3.930561 | 2.027261  |
| 112 | 1 | 0 | -3.481213 | 4.659599  | 4.130366  | 168 | 1 | 0 | 4.132710  | -3.213291 | -3.896178 |
| 113 | 1 | 0 | -1.198351 | 2.886893  | 3.276023  | 169 | 1 | 0 | -1.134881 | -2.940318 | 4.033784  |
| 114 | 1 | 0 | -4.141196 | 2.249842  | 3.316726  | 170 | 1 | 0 | 1.384564  | -4.125912 | 4.226126  |
| 115 | 1 | 0 | -2.303732 | 2.722762  | 0.935368  | 171 | 1 | 0 | -1.581533 | -6.651114 | -2.328174 |
| 116 | 1 | 0 | -5.308700 | 2.369082  | 1.077664  | 172 | 1 | 0 | -5.823729 | -2.234013 | -4.015938 |
| 117 | 1 | 0 | -4.180908 | 1.220499  | 0.333986  | 173 | 1 | 0 | -6.289985 | -0.783792 | -4.865812 |
| 118 | 1 | 0 | 2.984525  | 6.950224  | -0.072792 | 174 | 1 | 0 | -8.114288 | -2.926852 | -4.132447 |
| 119 | 1 | 0 | 2.138429  | 6.791977  | 2.259293  | 175 | 1 | 0 | -8.535456 | -1.371800 | -4.830936 |
| 120 | 1 | 0 | 0.938971  | 4.191611  | 1.290861  | 176 | 1 | 0 | -4.338047 | 3.929596  | -0.472343 |
| 121 | 1 | 0 | -0.556309 | 6.584538  | 2.312457  | 177 | 1 | 0 | -1.596538 | 2.374066  | -3.796982 |
| 122 | 1 | 0 | -0.453708 | 5.646927  | -0.554401 | 178 | 1 | 0 | -1.782139 | 0.653006  | -4.063948 |
| 123 | 1 | 0 | -1.149696 | 7.931038  | -1.101407 | 179 | 1 | 0 | 0.067869  | 1.180485  | -2.488658 |
| 124 | 1 | 0 | -1.003498 | 8.398237  | 0.586692  | 180 | 1 | 0 | -1.050237 | 1.974334  | -1.420355 |
| 125 | 1 | 0 | 3.965756  | 2.522013  | -3.285018 | 181 | 1 | 0 | -1.429202 | -0.940320 | -2.200403 |
| 126 | 1 | 0 | 5.466788  | 3.215783  | -1.437383 | 182 | 1 | 0 | -2.201406 | -0.087387 | -0.889406 |
| 127 | 1 | 0 | 4.571667  | 5.558959  | -1.205678 | 183 | 1 | 0 | -0.516258 | -1.557001 | 0.021166  |
| 128 | 1 | 0 | 2.411883  | 6.057153  | -2.395636 | 184 | 1 | 0 | 0.720174  | -0.888109 | -1.029784 |
| 129 | 1 | 0 | 0.783324  | 4.058384  | -2.286286 | 185 | 1 | 0 | 0.593316  | 1.273530  | 0.143518  |
| 130 | 1 | 0 | 2.840302  | 4.039217  | -4.516154 | 186 | 1 | 0 | -0.776587 | 0.700046  | 1.087417  |
| 131 | 1 | 0 | 1.360569  | 4.962015  | -4.456674 | 187 | 1 | 0 | 1.311376  | 0.685491  | 2.406112  |
| 132 | 1 | 0 | 6.503937  | -3.129841 | -2.586232 | 188 | 1 | 0 | 0.635327  | -0.920792 | 2.252885  |
| 133 | 1 | 0 | 7.373947  | -0.824982 | -2.156367 | 189 | 1 | 0 | 2.257413  | -1.572568 | 0.612098  |
| 134 | 1 | 0 | 4.939535  | -0.603408 | -0.396253 | 190 | 1 | 0 | 2.807084  | 0.061769  | 0.371548  |
| 135 | 1 | 0 | 5.471674  | 0.845662  | -2.978973 | 191 | 1 | 0 | 4.327206  | -1.470241 | 1.740112  |
| 136 | 1 | 0 | 3.441188  | -1.322465 | -2.397237 | 192 | 1 | 0 | 3.142299  | -1.429911 | 3.014897  |
| 137 | 1 | 0 | 2.936041  | -1.308915 | -4.753638 | 193 | 1 | 0 | 4.395711  | 1.097876  | 1.858415  |
| 138 | 1 | 0 | 4.210360  | -0.132515 | -5.078477 | 194 | 1 | 0 | 3.437093  | 0.978942  | 3.307864  |
| 139 | 1 | 0 | 2.568171  | -6.965319 | 0.643809  | 195 | 1 | 0 | 5.766988  | 1.204697  | 3.927920  |
| 140 | 1 | 0 | 4.916558  | -6.203412 | 0.809092  | 196 | 1 | 0 | 5.232488  | -0.394478 | 4.385897  |
| 141 | 1 | 0 | 3.671027  | -3.458313 | 0.745877  | 197 | 1 | 0 | 6.752777  | 0.169532  | 1.794209  |
| 142 | 1 | 0 | 5.499560  | -4.779841 | -1.259757 | 198 | 1 | 0 | 6.393682  | -1.390489 | 2.461375  |
| 143 | 1 | 0 | 2.560171  | -4.001502 | -1.443606 | 199 | 1 | 0 | -6.319615 | -0.208198 | -0.187079 |
| 144 | 1 | 0 | 2.590119  | -5.566087 | -3.405236 | 200 | 1 | 0 | -6.115701 | 1.307429  | -3.613058 |
| 145 | 1 | 0 | 4.339299  | -5.511832 | -3.379693 | 201 | 1 | 0 | -5.598617 | 1.300244  | -1.950808 |
| 146 | 1 | 0 | -2.839242 | -5.272943 | 2.870554  | 202 | 1 | 0 | -3.580442 | 2.123526  | -2.224900 |
| 147 | 1 | 0 | -0.636996 | -5.750054 | 3.729017  | 203 | 1 | 0 | 8.216343  | 0.680416  | 3.770025  |

|     |   |   |           |           |           |    |   |   |           |           |           |
|-----|---|---|-----------|-----------|-----------|----|---|---|-----------|-----------|-----------|
| 204 | 1 | 0 | 8.741517  | -0.783784 | 2.952039  | 45 | 8 | 0 | -5.347149 | -2.908401 | -0.152961 |
| 205 | 1 | 0 | 7.834582  | -0.892006 | 4.455838  | 46 | 8 | 0 | -2.582410 | -2.418265 | 0.284802  |
| 206 | 1 | 0 | -9.624671 | -1.119808 | -2.703698 | 47 | 8 | 0 | 0.615621  | -2.339451 | -5.651238 |
| 207 | 1 | 0 | -8.411040 | -4.271757 | -1.888319 | 48 | 8 | 0 | -1.796832 | -3.012919 | -4.070887 |

**(2R,5S)-4b-OOH (excluded)**

| Center<br>(Angstroms)<br>Number | Atomic<br>Number | Atomic<br>Type | Coordinates |           |           |     |   |   |           |           |           |
|---------------------------------|------------------|----------------|-------------|-----------|-----------|-----|---|---|-----------|-----------|-----------|
|                                 |                  |                | X           | Y         | Z         |     |   |   |           |           |           |
| 1                               | 6                | 0              | -1.956626   | -3.568439 | -0.301768 | 49  | 8 | 0 | -1.141371 | -2.991419 | -1.285382 |
| 2                               | 6                | 0              | -3.018512   | -4.496338 | -0.883713 | 50  | 8 | 0 | 1.864635  | -4.359148 | -2.887442 |
| 3                               | 6                | 0              | -4.036946   | -4.857606 | 0.200949  | 51  | 8 | 0 | 4.105465  | 2.147017  | -4.298811 |
| 4                               | 6                | 0              | -4.612600   | -3.614804 | 0.877544  | 52  | 8 | 0 | 2.473210  | -0.066507 | -5.213071 |
| 5                               | 6                | 0              | -3.537704   | -2.636404 | 1.337043  | 53  | 8 | 0 | 2.210381  | -2.126381 | -3.417003 |
| 6                               | 6                | 0              | -2.831579   | -3.001377 | 2.645864  | 54  | 8 | 0 | 5.489575  | -0.739827 | -2.520554 |
| 7                               | 6                | 0              | 1.894236    | -3.413148 | -3.937401 | 55  | 8 | 0 | 5.918819  | -2.897067 | -1.095609 |
| 8                               | 6                | 0              | 0.524930    | -3.272319 | -4.575128 | 56  | 8 | 0 | 2.378073  | 3.048931  | -2.500619 |
| 9                               | 6                | 0              | -0.487892   | -2.872005 | -3.511199 | 57  | 8 | 0 | 4.956721  | 4.515454  | -0.461898 |
| 10                              | 6                | 0              | -0.386944   | -3.751926 | -2.259080 | 58  | 8 | 0 | 4.355744  | 1.122151  | -1.704312 |
| 11                              | 6                | 0              | 1.033586    | -3.957981 | -1.755704 | 59  | 8 | 0 | 2.627700  | 2.008171  | 0.354015  |
| 12                              | 6                | 0              | 1.207639    | -5.097165 | -0.765878 | 60  | 8 | 0 | 3.464524  | 2.450009  | 2.765664  |
| 13                              | 6                | 0              | 5.197528    | 0.632607  | -2.737931 | 61  | 8 | 0 | -2.519681 | 5.491834  | -2.707899 |
| 14                              | 6                | 0              | 4.421891    | 0.780481  | -4.034647 | 62  | 8 | 0 | 0.075816  | 4.481219  | -2.596703 |
| 15                              | 6                | 0              | 3.155299    | -0.053336 | -3.941884 | 63  | 8 | 0 | 0.845961  | 3.175590  | -0.296203 |
| 16                              | 6                | 0              | 3.477238    | -1.495462 | -3.615986 | 64  | 8 | 0 | -1.945737 | 5.243467  | 0.921606  |
| 17                              | 6                | 0              | 4.311540    | -1.588728 | -2.345172 | 65  | 8 | 0 | 0.793911  | 3.519954  | 2.535095  |
| 18                              | 6                | 0              | 4.868520    | -2.981989 | -2.074479 | 66  | 8 | 0 | -7.158217 | 2.419245  | -2.778651 |
| 19                              | 6                | 0              | 2.236514    | 3.303689  | -0.077451 | 67  | 8 | 0 | -4.940239 | 4.132713  | -2.709219 |
| 20                              | 6                | 0              | 2.930292    | 3.729699  | -1.370969 | 68  | 8 | 0 | -3.417078 | 4.059765  | -0.427243 |
| 21                              | 6                | 0              | 4.435287    | 3.478636  | -1.324131 | 69  | 8 | 0 | -6.713228 | 3.021410  | 0.819432  |
| 22                              | 6                | 0              | 4.791792    | 2.103837  | -0.755403 | 70  | 8 | 0 | -3.646950 | 3.871385  | 2.607703  |
| 23                              | 6                | 0              | 4.041956    | 1.778520  | 0.529620  | 71  | 8 | 0 | -6.444748 | -3.140411 | -2.555873 |
| 24                              | 6                | 0              | 4.512096    | 2.550946  | 1.776535  | 72  | 8 | 0 | -7.134743 | -0.438143 | -2.841394 |
| 25                              | 6                | 0              | -2.724345   | 5.288694  | -0.267622 | 73  | 8 | 0 | -6.575502 | 1.077018  | -0.429562 |
| 26                              | 6                | 0              | -1.815192   | 5.458424  | -1.469421 | 74  | 8 | 0 | -7.372872 | -2.275214 | 0.833538  |
| 27                              | 6                | 0              | -0.820069   | 4.317989  | -1.476905 | 75  | 8 | 0 | -8.418727 | 1.024863  | 1.821032  |
| 28                              | 6                | 0              | 0.008646    | 4.330012  | -0.209636 | 76  | 7 | 0 | -1.742519 | -2.044856 | 2.790351  |
| 29                              | 6                | 0              | -0.912281   | 4.199554  | 1.002152  | 77  | 8 | 0 | 2.614591  | -5.361239 | -0.584250 |
| 30                              | 6                | 0              | -0.263642   | 4.470379  | 2.350858  | 78  | 6 | 0 | -0.606330 | 1.494914  | 5.038234  |
| 31                              | 6                | 0              | -7.205860   | 2.330083  | -0.329108 | 79  | 6 | 0 | -0.131998 | -0.636117 | 3.871366  |
| 32                              | 6                | 0              | -6.817222   | 3.128083  | -1.563216 | 80  | 6 | 0 | 0.692374  | 0.903970  | 5.552123  |
| 33                              | 6                | 0              | -5.315028   | 3.293832  | -1.599256 | 81  | 6 | 0 | 2.035584  | -4.544810 | 3.212177  |
| 34                              | 6                | 0              | -4.846739   | 3.989126  | -0.336408 | 82  | 6 | 0 | 3.464820  | -4.575304 | 2.636956  |
| 35                              | 6                | 0              | -5.266189   | 3.186298  | 0.893819  | 83  | 6 | 0 | 4.485147  | -4.008457 | 3.642699  |
| 36                              | 6                | 0              | -5.025221   | 3.881864  | 2.233162  | 84  | 6 | 0 | 5.881799  | -3.741209 | 3.040876  |
| 37                              | 6                | 0              | -6.755091   | -3.003796 | -0.216637 | 85  | 6 | 0 | 5.926368  | -2.457823 | 2.186556  |
| 38                              | 6                | 0              | -7.139238   | -2.398677 | -1.549597 | 86  | 6 | 0 | 7.351518  | -2.128104 | 1.703556  |
| 39                              | 6                | 0              | -6.699646   | -0.954205 | -1.576609 | 87  | 6 | 0 | 7.431450  | -0.754337 | 1.006752  |
| 40                              | 6                | 0              | -7.310201   | -0.174051 | -0.430273 | 88  | 6 | 0 | 8.849364  | -0.455065 | 0.477498  |
| 41                              | 6                | 0              | -7.085076   | -0.855962 | 0.915701  | 89  | 6 | 0 | 8.963654  | 0.875310  | -0.299204 |
| 42                              | 6                | 0              | -8.056704   | -0.353128 | 1.994685  | 90  | 6 | 0 | 8.835128  | 2.120340  | 0.601206  |
| 43                              | 8                | 0              | -3.620351   | -3.929496 | -2.048701 | 91  | 6 | 0 | 8.880619  | 3.452722  | -0.178847 |
| 44                              | 8                | 0              | -3.296546   | -5.635850 | 1.162553  | 92  | 6 | 0 | -1.271165 | -1.648267 | 3.989420  |
|                                 |                  |                |             |           |           | 93  | 8 | 0 | -1.753672 | -1.997559 | 5.050520  |
|                                 |                  |                |             |           |           | 94  | 6 | 0 | -0.745555 | 0.794735  | 3.666258  |
|                                 |                  |                |             |           |           | 95  | 7 | 0 | 0.530097  | -0.481271 | 5.186350  |
|                                 |                  |                |             |           |           | 96  | 8 | 0 | 1.443285  | -1.355144 | 5.633293  |
|                                 |                  |                |             |           |           | 97  | 6 | 0 | 0.865261  | -0.948588 | 2.730669  |
|                                 |                  |                |             |           |           | 98  | 6 | 0 | 1.108266  | -2.421734 | 2.426699  |
|                                 |                  |                |             |           |           | 99  | 8 | 0 | 0.880355  | -2.861494 | 1.300212  |
|                                 |                  |                |             |           |           | 100 | 7 | 0 | 1.578521  | -3.166659 | 3.429620  |

|     |   |   |           |           |           |     |   |   |           |           |           |
|-----|---|---|-----------|-----------|-----------|-----|---|---|-----------|-----------|-----------|
| 101 | 6 | 0 | 10.253728 | 3.740992  | -0.817077 | 157 | 1 | 0 | 3.425362  | 2.472352  | -3.662235 |
| 102 | 8 | 0 | 1.818996  | 1.310734  | 4.728949  | 158 | 1 | 0 | 2.418853  | 0.834148  | -5.562402 |
| 103 | 8 | 0 | 2.065010  | 2.750871  | 4.881336  | 159 | 1 | 0 | 6.527923  | -2.207124 | -1.388962 |
| 104 | 1 | 0 | -1.386233 | -4.098202 | 0.441316  | 160 | 1 | 0 | 1.461316  | 3.367692  | -2.638305 |
| 105 | 1 | 0 | -2.547496 | -5.420004 | -1.179938 | 161 | 1 | 0 | 5.894396  | 4.680951  | -0.624641 |
| 106 | 1 | 0 | -4.835575 | -5.430758 | -0.253695 | 162 | 1 | 0 | 2.625081  | 2.278631  | 2.304870  |
| 107 | 1 | 0 | -5.269426 | -3.871428 | 1.699823  | 163 | 1 | 0 | -3.323762 | 4.931907  | -2.700601 |
| 108 | 1 | 0 | -4.007558 | -1.675796 | 1.468420  | 164 | 1 | 0 | -0.443448 | 4.757340  | -3.368284 |
| 109 | 1 | 0 | -2.468867 | -4.016391 | 2.621394  | 165 | 1 | 0 | 1.084166  | 3.441587  | 3.460906  |
| 110 | 1 | 0 | -3.506565 | -2.890867 | 3.482477  | 166 | 1 | 0 | -8.073904 | 2.568257  | -3.050565 |
| 111 | 1 | 0 | 2.633624  | -3.737143 | -4.653091 | 167 | 1 | 0 | -5.263430 | 3.747221  | -3.536188 |
| 112 | 1 | 0 | 0.223321  | -4.218618 | -4.994715 | 168 | 1 | 0 | -3.124833 | 4.509957  | 2.098099  |
| 113 | 1 | 0 | -0.287152 | -1.858754 | -3.197484 | 169 | 1 | 0 | -6.485672 | -2.657616 | -3.395032 |
| 114 | 1 | 0 | -0.855546 | -4.701197 | -2.483399 | 170 | 1 | 0 | -6.929026 | 0.509803  | -2.915197 |
| 115 | 1 | 0 | 1.399293  | -3.042255 | -1.330512 | 171 | 1 | 0 | -7.696893 | 1.640453  | 2.011636  |
| 116 | 1 | 0 | 0.698484  | -5.982638 | -1.133730 | 172 | 1 | 0 | -1.280552 | -1.822693 | 1.933151  |
| 117 | 1 | 0 | 0.827935  | -4.800242 | 0.189736  | 173 | 1 | 0 | 2.985638  | -5.546772 | -1.457411 |
| 118 | 1 | 0 | 6.139450  | 1.158292  | -2.769109 | 174 | 1 | 0 | -1.403389 | 1.201890  | 5.706653  |
| 119 | 1 | 0 | 5.030193  | 0.419898  | -4.850086 | 175 | 1 | 0 | 1.999860  | -5.055907 | 4.166033  |
| 120 | 1 | 0 | 2.521571  | 0.352513  | -3.168168 | 176 | 1 | 0 | 1.353199  | -5.031800 | 2.532839  |
| 121 | 1 | 0 | 4.004389  | -1.937263 | -4.453318 | 177 | 1 | 0 | 3.467407  | -4.031809 | 1.702371  |
| 122 | 1 | 0 | 3.740843  | -1.229225 | -1.506274 | 178 | 1 | 0 | 3.723198  | -5.601177 | 2.395991  |
| 123 | 1 | 0 | 5.247609  | -3.403449 | -3.000218 | 179 | 1 | 0 | 4.107782  | -3.078613 | 4.055539  |
| 124 | 1 | 0 | 4.106842  | -3.622082 | -1.669278 | 180 | 1 | 0 | 4.577304  | -4.709287 | 4.468871  |
| 125 | 1 | 0 | 2.443356  | 4.027957  | 0.692905  | 181 | 1 | 0 | 6.598873  | -3.641439 | 3.851565  |
| 126 | 1 | 0 | 2.799544  | 4.797884  | -1.483552 | 182 | 1 | 0 | 6.191803  | -4.589090 | 2.437065  |
| 127 | 1 | 0 | 4.819391  | 3.557899  | -2.330755 | 183 | 1 | 0 | 5.302735  | -2.571771 | 1.310436  |
| 128 | 1 | 0 | 5.859995  | 2.034540  | -0.585414 | 184 | 1 | 0 | 5.546328  | -1.630376 | 2.782157  |
| 129 | 1 | 0 | 4.118906  | 0.718820  | 0.704810  | 185 | 1 | 0 | 8.038820  | -2.138258 | 2.545741  |
| 130 | 1 | 0 | 4.704468  | 3.581119  | 1.539199  | 186 | 1 | 0 | 7.662772  | -2.898440 | 1.006746  |
| 131 | 1 | 0 | 5.404827  | 2.094149  | 2.175253  | 187 | 1 | 0 | 6.727126  | -0.739661 | 0.181512  |
| 132 | 1 | 0 | -3.410800 | 6.113775  | -0.161388 | 188 | 1 | 0 | 7.129977  | 0.012264  | 1.714231  |
| 133 | 1 | 0 | -1.283710 | 6.393381  | -1.371621 | 189 | 1 | 0 | 9.550425  | -0.447598 | 1.307617  |
| 134 | 1 | 0 | -1.339823 | 3.375495  | -1.548769 | 190 | 1 | 0 | 9.146681  | -1.267323 | -0.179774 |
| 135 | 1 | 0 | 0.580264  | 5.249082  | -0.158185 | 191 | 1 | 0 | 9.921539  | 0.901371  | -0.806745 |
| 136 | 1 | 0 | -1.378331 | 3.229278  | 0.989568  | 192 | 1 | 0 | 8.195280  | 0.902001  | -1.068037 |
| 137 | 1 | 0 | -1.027194 | 4.369253  | 3.110484  | 193 | 1 | 0 | 7.902472  | 2.070423  | 1.152399  |
| 138 | 1 | 0 | 0.105553  | 5.488598  | 2.361728  | 194 | 1 | 0 | 9.635554  | 2.112878  | 1.335382  |
| 139 | 1 | 0 | -8.266867 | 2.236873  | -0.193223 | 195 | 1 | 0 | 8.120938  | 3.436554  | -0.958168 |
| 140 | 1 | 0 | -7.288098 | 4.100961  | -1.539593 | 196 | 1 | 0 | 8.633746  | 4.265142  | 0.499028  |
| 141 | 1 | 0 | -4.850508 | 2.324014  | -1.673185 | 197 | 1 | 0 | -0.159208 | 1.343193  | 2.947033  |
| 142 | 1 | 0 | -5.275881 | 4.983745  | -0.297037 | 198 | 1 | 0 | -1.768484 | 0.739346  | 3.326385  |
| 143 | 1 | 0 | -4.775618 | 2.227545  | 0.879908  | 199 | 1 | 0 | -0.569164 | 2.567720  | 4.949715  |
| 144 | 1 | 0 | -5.560688 | 3.329545  | 2.988600  | 200 | 1 | 0 | 0.510857  | -0.515820 | 1.806767  |
| 145 | 1 | 0 | -5.443706 | 4.882920  | 2.195760  | 201 | 1 | 0 | 1.795790  | -0.460270 | 2.985289  |
| 146 | 1 | 0 | -7.093924 | -4.021946 | -0.117223 | 202 | 1 | 0 | 11.027577 | 3.741690  | -0.056985 |
| 147 | 1 | 0 | -8.212015 | -2.455361 | -1.677240 | 203 | 1 | 0 | 10.507063 | 2.995142  | -1.559812 |
| 148 | 1 | 0 | -5.625931 | -0.918305 | -1.479018 | 204 | 1 | 0 | 10.257093 | 4.710754  | -1.302644 |
| 149 | 1 | 0 | -8.359968 | -0.000676 | -0.617007 | 205 | 1 | 0 | 1.686130  | -2.750028 | 4.330819  |
| 150 | 1 | 0 | -6.051786 | -0.700895 | 1.180794  | 206 | 1 | 0 | 0.917691  | 1.028973  | 6.593804  |
| 151 | 1 | 0 | -7.655540 | -0.547605 | 2.981116  | 207 | 1 | 0 | 2.865861  | 2.779824  | 4.287159  |
| 152 | 1 | 0 | -8.966272 | -0.917139 | 1.876816  |     |   |   |           |           |           |
| 153 | 1 | 0 | -4.449860 | -3.460754 | -1.862470 |     |   |   |           |           |           |
| 154 | 1 | 0 | -3.863322 | -6.229989 | 1.670777  |     |   |   |           |           |           |
| 155 | 1 | 0 | 1.092351  | -1.535605 | -5.377861 |     |   |   |           |           |           |
| 156 | 1 | 0 | -2.457065 | -3.155439 | -3.367921 |     |   |   |           |           |           |

(2R,5S)-4b-OOH (included)



| Center<br>Number | Atomic<br>Number | Atomic<br>Type | Coordinates (Angstroms) |           |           |     |   |   |            |           |           |
|------------------|------------------|----------------|-------------------------|-----------|-----------|-----|---|---|------------|-----------|-----------|
|                  |                  |                | X                       | Y         | Z         |     |   |   |            |           |           |
| 1                | 6                | 0              | -3.281020               | -0.854927 | 2.881999  | 54  | 8 | 0 | -0.103734  | 7.089923  | 0.044199  |
| 2                | 6                | 0              | -2.639583               | -1.766242 | 3.913636  | 55  | 8 | 0 | -3.619356  | 6.539991  | 0.491459  |
| 3                | 6                | 0              | -3.108143               | -3.197373 | 3.725643  | 56  | 8 | 0 | 3.486050   | 3.721652  | -0.121731 |
| 4                | 6                | 0              | -2.950296               | -3.683565 | 2.285641  | 57  | 8 | 0 | 3.576420   | 5.558820  | -3.329288 |
| 5                | 6                | 0              | -3.492347               | -2.694710 | 1.249998  | 58  | 8 | 0 | 1.309981   | 5.316145  | -0.523900 |
| 6                | 6                | 0              | -5.014254               | -2.832167 | 1.098713  | 59  | 8 | 0 | 1.719066   | 2.966756  | -2.125729 |
| 7                | 6                | 0              | -3.215784               | 4.460732  | 2.505994  | 60  | 8 | 0 | 0.325135   | 3.042166  | -4.594466 |
| 8                | 6                | 0              | -2.953575               | 3.962938  | 3.914389  | 61  | 8 | 0 | 7.502815   | -0.742411 | -0.786245 |
| 9                | 6                | 0              | -2.394845               | 2.546146  | 3.892214  | 62  | 8 | 0 | 6.066247   | 1.876402  | -0.840407 |
| 10               | 6                | 0              | -3.285607               | 1.621263  | 3.088904  | 63  | 8 | 0 | 3.493034   | 1.650061  | -1.897463 |
| 11               | 6                | 0              | -3.532148               | 2.201580  | 1.705467  | 64  | 8 | 0 | 5.241159   | -1.020774 | -3.661261 |
| 12               | 6                | 0              | -4.581676               | 1.479879  | 0.887777  | 65  | 8 | 0 | 2.225923   | 1.014295  | -4.211571 |
| 13               | 6                | 0              | 1.171924                | 6.512126  | 0.225810  | 66  | 8 | 0 | 4.992847   | -4.848765 | 2.205169  |
| 14               | 6                | 0              | 1.332029                | 6.092774  | 1.670168  | 67  | 8 | 0 | 6.303338   | -2.809912 | 0.771111  |
| 15               | 6                | 0              | 0.249133                | 5.080630  | 1.985528  | 68  | 8 | 0 | 5.197018   | -2.061541 | -1.608427 |
| 16               | 6                | 0              | -1.146778               | 5.624126  | 1.732556  | 69  | 8 | 0 | 3.940556   | -5.493523 | -1.261543 |
| 17               | 6                | 0              | -1.251286               | 6.248067  | 0.333951  | 70  | 8 | 0 | 3.678650   | -3.224923 | -4.101521 |
| 18               | 6                | 0              | -2.399061               | 7.229972  | 0.171795  | 71  | 8 | 0 | -0.063678  | -4.048609 | 4.395002  |
| 19               | 6                | 0              | 3.122374                | 2.926753  | -2.361275 | 72  | 8 | 0 | 2.521767   | -4.281070 | 3.248373  |
| 20               | 6                | 0              | 3.769889                | 4.003465  | -1.510214 | 73  | 8 | 0 | 2.668722   | -4.747372 | 0.528803  |
| 21               | 6                | 0              | 3.214292                | 5.357167  | -1.947955 | 74  | 8 | 0 | -0.681138  | -5.992772 | 1.337149  |
| 22               | 6                | 0              | 1.686921                | 5.384737  | -1.917554 | 75  | 8 | 0 | -0.652673  | -6.242844 | -1.533573 |
| 23               | 6                | 0              | 1.040051                | 4.168279  | -2.579031 | 76  | 8 | 0 | -4.775314  | 2.206894  | -0.346635 |
| 24               | 6                | 0              | 0.963625                | 4.225154  | -4.104503 | 77  | 6 | 0 | -6.276082  | -1.638455 | -2.276345 |
| 25               | 6                | 0              | 6.048125                | -1.447125 | -2.555598 | 78  | 6 | 0 | -6.454499  | -2.420014 | -3.596642 |
| 26               | 6                | 0              | 6.681245                | -0.257137 | -1.838727 | 79  | 6 | 0 | -7.819200  | -3.134838 | -3.443497 |
| 27               | 6                | 0              | 5.548580                | 0.639887  | -1.367507 | 80  | 6 | 0 | -8.647898  | -2.119168 | -2.671560 |
| 28               | 6                | 0              | 4.614658                | 0.983878  | -2.517090 | 81  | 7 | 0 | -7.673302  | -1.575537 | -1.763835 |
| 29               | 6                | 0              | 4.086011                | -0.242027 | -3.235487 | 82  | 8 | 0 | -8.028611  | -0.724473 | -0.795085 |
| 30               | 6                | 0              | 3.273734                | 0.051951  | -4.494849 | 83  | 6 | 0 | -5.745990  | -0.214346 | -2.451916 |
| 31               | 6                | 0              | 3.801553                | -5.519081 | 0.151294  | 84  | 6 | 0 | -2.232374  | 1.039593  | -3.158935 |
| 32               | 6                | 0              | 5.025552                | -4.875041 | 0.781162  | 85  | 6 | 0 | -1.206596  | 0.905081  | -2.022743 |
| 33               | 6                | 0              | 5.126788                | -3.461180 | 0.248961  | 86  | 6 | 0 | -1.288506  | -0.460979 | -1.314393 |
| 34               | 6                | 0              | 5.215897                | -3.454461 | -1.261013 | 87  | 6 | 0 | -0.078537  | -0.757433 | -0.404500 |
| 35               | 6                | 0              | 3.993440                | -4.162950 | -1.850808 | 88  | 6 | 0 | 0.154408   | 0.336805  | 0.655982  |
| 36               | 6                | 0              | 4.019569                | -4.400854 | -3.359265 | 89  | 6 | 0 | 1.248727   | -0.024755 | 1.683231  |
| 37               | 6                | 0              | -1.031486               | -5.182319 | 2.442381  | 90  | 6 | 0 | 2.607422   | -0.331961 | 1.026274  |
| 38               | 6                | 0              | 0.197239                | -4.924689 | 3.301608  | 91  | 6 | 0 | 3.788674   | -0.390175 | 2.019631  |
| 39               | 6                | 0              | 1.325133                | -4.376317 | 2.446167  | 92  | 6 | 0 | 4.223490   | 1.001537  | 2.524289  |
| 40               | 6                | 0              | 1.601161                | -5.319443 | 1.297512  | 93  | 6 | 0 | 5.570390   | 0.990671  | 3.280560  |
| 41               | 6                | 0              | 0.337628                | -5.455829 | 0.454132  | 94  | 6 | 0 | 6.771948   | 0.579118  | 2.402485  |
| 42               | 6                | 0              | 0.496381                | -6.429402 | -0.691876 | 95  | 7 | 0 | -5.548960  | -2.009944 | 0.018187  |
| 43               | 8                | 0              | -1.214673               | -1.713570 | 3.778422  | 96  | 6 | 0 | -5.468116  | -2.454005 | -1.262556 |
| 44               | 8                | 0              | -4.529454               | -3.215417 | 3.990111  | 97  | 8 | 0 | -4.831083  | -3.449335 | -1.557098 |
| 45               | 8                | 0              | -1.547334               | -3.918436 | 2.037955  | 98  | 8 | 0 | -3.969560  | -1.056128 | -3.826884 |
| 46               | 8                | 0              | -3.108108               | -1.328272 | 1.557472  | 99  | 6 | 0 | -4.345446  | -0.190945 | -3.044684 |
| 47               | 8                | 0              | -2.064098               | 4.815158  | 4.645048  | 100 | 7 | 0 | -3.602282  | 0.861946  | -2.668664 |
| 48               | 8                | 0              | -2.341252               | 2.037701  | 5.235875  | 101 | 6 | 0 | 8.111091   | 0.802563  | 3.131289  |
| 49               | 8                | 0              | -2.577569               | 0.370747  | 2.974071  | 102 | 8 | 0 | -9.041541  | -1.018836 | -3.540933 |
| 50               | 8                | 0              | -4.085978               | 3.536515  | 1.872362  | 103 | 8 | 0 | -10.068093 | -1.605743 | -4.413115 |
| 51               | 8                | 0              | 2.614198                | 5.526526  | 1.947212  | 104 | 1 | 0 | -4.325630  | -0.726493 | 3.120172  |
| 52               | 8                | 0              | 0.334750                | 4.719037  | 3.382125  | 105 | 1 | 0 | -2.933173  | -1.408071 | 4.892498  |
| 53               | 8                | 0              | -1.992113               | 4.463559  | 1.775698  | 106 | 1 | 0 | -2.558701  | -3.848918 | 4.389059  |
|                  |                  |                |                         |           |           | 107 | 1 | 0 | -3.494212  | -4.612768 | 2.184249  |
|                  |                  |                |                         |           |           | 108 | 1 | 0 | -3.030701  | -2.911744 | 0.303045  |
|                  |                  |                |                         |           |           | 109 | 1 | 0 | -5.511368  | -2.578542 | 2.018396  |

|     |   |   |           |           |           |     |   |   |            |           |           |
|-----|---|---|-----------|-----------|-----------|-----|---|---|------------|-----------|-----------|
| 110 | 1 | 0 | -5.220996 | -3.870246 | 0.873975  | 166 | 1 | 0 | 4.115154   | -4.582864 | 2.558588  |
| 111 | 1 | 0 | -3.685961 | 5.421972  | 2.475780  | 167 | 1 | 0 | 6.420856   | -3.074145 | 1.696528  |
| 112 | 1 | 0 | -3.890971 | 3.954737  | 4.449432  | 168 | 1 | 0 | 4.392018   | -2.569431 | -4.116165 |
| 113 | 1 | 0 | -1.413736 | 2.566290  | 3.440072  | 169 | 1 | 0 | -0.391754  | -3.170317 | 4.092567  |
| 114 | 1 | 0 | -4.216463 | 1.480487  | 3.624078  | 170 | 1 | 0 | 2.290905   | -3.950550 | 4.129314  |
| 115 | 1 | 0 | -2.607024 | 2.259618  | 1.159779  | 171 | 1 | 0 | -0.646725  | -6.856209 | -2.278826 |
| 116 | 1 | 0 | -5.509769 | 1.445433  | 1.446766  | 172 | 1 | 0 | -5.630471  | -3.091839 | -3.744900 |
| 117 | 1 | 0 | -4.259306 | 0.487579  | 0.632931  | 173 | 1 | 0 | -6.500547  | -1.724917 | -4.418368 |
| 118 | 1 | 0 | 1.893315  | 7.257458  | -0.068633 | 174 | 1 | 0 | -7.710487  | -4.031351 | -2.847239 |
| 119 | 1 | 0 | 1.217981  | 6.957655  | 2.305212  | 175 | 1 | 0 | -8.276389  | -3.370082 | -4.390358 |
| 120 | 1 | 0 | 0.381419  | 4.208166  | 1.368032  | 176 | 1 | 0 | -4.872153  | 3.145980  | -0.125949 |
| 121 | 1 | 0 | -1.405616 | 6.332713  | 2.506949  | 177 | 1 | 0 | -2.118655  | 2.005296  | -3.635787 |
| 122 | 1 | 0 | -1.324417 | 5.441079  | -0.375077 | 178 | 1 | 0 | -2.067724  | 0.273982  | -3.900700 |
| 123 | 1 | 0 | -2.395993 | 7.592370  | -0.847591 | 179 | 1 | 0 | -0.220756  | 1.066857  | -2.441746 |
| 124 | 1 | 0 | -2.225579 | 8.066838  | 0.836228  | 180 | 1 | 0 | -1.371122  | 1.701906  | -1.303627 |
| 125 | 1 | 0 | 3.360666  | 3.060556  | -3.397860 | 181 | 1 | 0 | -1.372292  | -1.243180 | -2.062887 |
| 126 | 1 | 0 | 4.840843  | 3.971743  | -1.628897 | 182 | 1 | 0 | -2.183574  | -0.500938 | -0.708877 |
| 127 | 1 | 0 | 3.602455  | 6.142389  | -1.312506 | 183 | 1 | 0 | -0.254273  | -1.702063 | 0.103471  |
| 128 | 1 | 0 | 1.324246  | 6.297969  | -2.368437 | 184 | 1 | 0 | 0.810241   | -0.870943 | -1.017890 |
| 129 | 1 | 0 | 0.040843  | 4.065481  | -2.192615 | 185 | 1 | 0 | 0.434841   | 1.261379  | 0.159999  |
| 130 | 1 | 0 | 1.937566  | 4.385598  | -4.538685 | 186 | 1 | 0 | -0.777597  | 0.500068  | 1.183350  |
| 131 | 1 | 0 | 0.337391  | 5.062637  | -4.378626 | 187 | 1 | 0 | 1.357939   | 0.801388  | 2.380496  |
| 132 | 1 | 0 | 6.792780  | -2.124312 | -2.940671 | 188 | 1 | 0 | 0.928727   | -0.890094 | 2.256631  |
| 133 | 1 | 0 | 7.315711  | 0.285160  | -2.521710 | 189 | 1 | 0 | 2.534272   | -1.287871 | 0.519004  |
| 134 | 1 | 0 | 4.985015  | 0.108402  | -0.621787 | 190 | 1 | 0 | 2.814225   | 0.411754  | 0.263566  |
| 135 | 1 | 0 | 5.127982  | 1.641698  | -3.206726 | 191 | 1 | 0 | 4.626547   | -0.866293 | 1.528145  |
| 136 | 1 | 0 | 3.502334  | -0.824155 | -2.544058 | 192 | 1 | 0 | 3.523774   | -1.019089 | 2.866534  |
| 137 | 1 | 0 | 2.858649  | -0.873458 | -4.865199 | 193 | 1 | 0 | 4.300396   | 1.680404  | 1.679624  |
| 138 | 1 | 0 | 3.909952  | 0.491718  | -5.245533 | 194 | 1 | 0 | 3.456144   | 1.404392  | 3.177942  |
| 139 | 1 | 0 | 3.691094  | -6.550790 | 0.443838  | 195 | 1 | 0 | 5.752950   | 1.987438  | 3.673368  |
| 140 | 1 | 0 | 5.900505  | -5.436775 | 0.490340  | 196 | 1 | 0 | 5.501711   | 0.320886  | 4.134145  |
| 141 | 1 | 0 | 4.245480  | -2.917130 | 0.540167  | 197 | 1 | 0 | 6.768197   | 1.137511  | 1.474120  |
| 142 | 1 | 0 | 6.136662  | -3.923271 | -1.586507 | 198 | 1 | 0 | 6.692681   | -0.465718 | 2.131192  |
| 143 | 1 | 0 | 3.106473  | -3.609849 | -1.591952 | 199 | 1 | 0 | -6.193108  | -1.279833 | 0.230184  |
| 144 | 1 | 0 | 3.263643  | -5.136967 | -3.576739 | 200 | 1 | 0 | -6.412170  | 0.283341  | -3.149977 |
| 145 | 1 | 0 | 4.981910  | -4.811673 | -3.649337 | 201 | 1 | 0 | -5.782241  | 0.338388  | -1.528499 |
| 146 | 1 | 0 | -1.772204 | -5.739783 | 2.994153  | 202 | 1 | 0 | -3.948550  | 1.477899  | -1.953982 |
| 147 | 1 | 0 | 0.520572  | -5.865606 | 3.721927  | 203 | 1 | 0 | 8.242173   | 1.851255  | 3.377884  |
| 148 | 1 | 0 | 1.055332  | -3.406223 | 2.055608  | 204 | 1 | 0 | 8.941742   | 0.494831  | 2.506384  |
| 149 | 1 | 0 | 1.891833  | -6.287322 | 1.688690  | 205 | 1 | 0 | 8.147729   | 0.231962  | 4.054336  |
| 150 | 1 | 0 | 0.032386  | -4.497037 | 0.068091  | 206 | 1 | 0 | -9.517929  | -2.488564 | -2.161867 |
| 151 | 1 | 0 | 0.543030  | -7.432923 | -0.284535 | 207 | 1 | 0 | -10.505194 | -0.795420 | -4.720415 |
| 152 | 1 | 0 | 1.415398  | -6.208292 | -1.218836 |     |   |   |            |           |           |
| 153 | 1 | 0 | -0.955570 | -0.804388 | 3.565506  |     |   |   |            |           |           |
| 154 | 1 | 0 | -4.722107 | -3.332185 | 4.929068  |     |   |   |            |           |           |
| 155 | 1 | 0 | -1.155844 | 4.775465  | 4.278763  |     |   |   |            |           |           |
| 156 | 1 | 0 | -2.000131 | 2.739197  | 5.810484  |     |   |   |            |           |           |
| 157 | 1 | 0 | 2.928658  | 4.948152  | 1.224575  |     |   |   |            |           |           |
| 158 | 1 | 0 | 1.264807  | 4.580598  | 3.617698  |     |   |   |            |           |           |
| 159 | 1 | 0 | -4.393270 | 7.084952  | 0.302256  |     |   |   |            |           |           |
| 160 | 1 | 0 | 2.648924  | 3.231424  | -0.091541 |     |   |   |            |           |           |
| 161 | 1 | 0 | 4.483538  | 5.875418  | -3.429310 |     |   |   |            |           |           |
| 162 | 1 | 0 | 0.961273  | 2.308179  | -4.656052 |     |   |   |            |           |           |
| 163 | 1 | 0 | 7.028147  | -1.370661 | -0.207848 |     |   |   |            |           |           |
| 164 | 1 | 0 | 5.420271  | 2.262366  | -0.232018 |     |   |   |            |           |           |
| 165 | 1 | 0 | 1.845741  | 0.878894  | -3.333283 |     |   |   |            |           |           |

  

| <b>(2S,5S)-4a-OOH (excluded)</b> |  |  |        |        |        |           |           |           |                         |  |  |   |  |  |
|----------------------------------|--|--|--------|--------|--------|-----------|-----------|-----------|-------------------------|--|--|---|--|--|
|                                  |  |  | Center |        |        | Atomic    |           |           | Coordinates (Angstroms) |  |  |   |  |  |
|                                  |  |  | Number | Atomic | Atomic | X         |           |           | Y                       |  |  | Z |  |  |
|                                  |  |  |        | Number | Type   |           |           |           |                         |  |  |   |  |  |
|                                  |  |  | 1      | 6      | 0      | -1.037674 | -3.960972 | -1.218600 |                         |  |  |   |  |  |
|                                  |  |  | 2      | 6      | 0      | -2.021996 | -4.523605 | -2.227431 |                         |  |  |   |  |  |
|                                  |  |  | 3      | 6      | 0      | -2.995737 | -5.428574 | -1.466723 |                         |  |  |   |  |  |
|                                  |  |  | 4      | 6      | 0      | -3.655991 | -4.700953 | -0.295807 |                         |  |  |   |  |  |
|                                  |  |  | 5      | 6      | 0      | -2.669503 | -3.944627 | 0.588436  |                         |  |  |   |  |  |
|                                  |  |  | 6      | 6      | 0      | -1.875256 | -4.775279 | 1.609544  |                         |  |  |   |  |  |
|                                  |  |  | 7      | 6      | 0      | 3.491931  | -2.863409 | -3.660355 |                         |  |  |   |  |  |
|                                  |  |  | 8      | 6      | 0      | 2.314892  | -3.255434 | -4.558038 |                         |  |  |   |  |  |

|    |   |   |           |           |           |     |   |   |           |           |           |
|----|---|---|-----------|-----------|-----------|-----|---|---|-----------|-----------|-----------|
| 9  | 6 | 0 | 1.004185  | -2.921628 | -3.855018 | 65  | 8 | 0 | 0.282496  | 3.539490  | 2.197258  |
| 10 | 6 | 0 | 1.033463  | -3.452200 | -2.434817 | 66  | 8 | 0 | -7.495271 | 1.658079  | -2.850037 |
| 11 | 6 | 0 | 2.215771  | -2.927736 | -1.646725 | 67  | 8 | 0 | -5.575579 | 3.773468  | -2.876321 |
| 12 | 6 | 0 | 2.271181  | -3.438367 | -0.211968 | 68  | 8 | 0 | -3.725073 | 3.804162  | -0.866725 |
| 13 | 6 | 0 | 5.519015  | 1.986794  | -2.870257 | 69  | 8 | 0 | -6.456068 | 1.905785  | 0.682735  |
| 14 | 6 | 0 | 4.898414  | 1.862218  | -4.251947 | 70  | 8 | 0 | -3.137736 | 2.377909  | 2.010686  |
| 15 | 6 | 0 | 3.928618  | 0.692592  | -4.256182 | 71  | 8 | 0 | -5.549670 | -3.685679 | -3.427936 |
| 16 | 6 | 0 | 4.554596  | -0.585442 | -3.740623 | 72  | 8 | 0 | -6.621390 | -1.010348 | -3.284695 |
| 17 | 6 | 0 | 5.243315  | -0.366812 | -2.401254 | 73  | 8 | 0 | -6.266593 | 0.171233  | -0.819599 |
| 18 | 6 | 0 | 6.128809  | -1.517084 | -1.952507 | 74  | 8 | 0 | -6.596043 | -3.375420 | 0.073877  |
| 19 | 6 | 0 | 1.768769  | 3.892229  | -0.497585 | 75  | 8 | 0 | -7.820421 | -0.352519 | 1.615749  |
| 20 | 6 | 0 | 2.443592  | 4.399675  | -1.768591 | 76  | 7 | 0 | -0.929088 | -3.873247 | 2.257868  |
| 21 | 6 | 0 | 3.950431  | 4.529525  | -1.556204 | 77  | 8 | 0 | 1.152846  | -2.909049 | 0.550361  |
| 22 | 6 | 0 | 4.552981  | 3.261924  | -0.946044 | 78  | 6 | 0 | -3.373039 | -0.324615 | 5.095820  |
| 23 | 6 | 0 | 3.750284  | 2.717633  | 0.233948  | 79  | 7 | 0 | -2.451750 | -0.593795 | 4.009428  |
| 24 | 6 | 0 | 3.911094  | 3.496171  | 1.544871  | 80  | 8 | 0 | -2.718007 | -0.438275 | 2.727714  |
| 25 | 6 | 0 | -3.315199 | 5.147158  | -0.610922 | 81  | 6 | 0 | -1.378104 | -1.358910 | 5.964484  |
| 26 | 6 | 0 | -2.507063 | 5.562451  | -1.837070 | 82  | 6 | 0 | -1.112092 | -0.900809 | 4.491293  |
| 27 | 6 | 0 | -1.311374 | 4.630760  | -1.933108 | 83  | 6 | 0 | -2.924621 | -1.350839 | 6.126579  |
| 28 | 6 | 0 | -0.557095 | 4.607799  | -0.611738 | 84  | 8 | 0 | -0.717937 | 1.424489  | 3.896954  |
| 29 | 6 | 0 | -1.420892 | 4.271438  | 0.582550  | 85  | 6 | 0 | -0.289807 | 0.399591  | 4.443894  |
| 30 | 6 | 0 | -0.772202 | 4.495597  | 1.941403  | 86  | 7 | 0 | 0.906164  | 0.338789  | 5.015518  |
| 31 | 6 | 0 | -7.049599 | 1.305573  | -0.469507 | 87  | 6 | 0 | 1.813472  | 1.507145  | 5.085584  |
| 32 | 6 | 0 | -7.003715 | 2.258099  | -1.650026 | 88  | 6 | 0 | 3.043195  | 1.158571  | 5.933065  |
| 33 | 6 | 0 | -5.587783 | 2.752924  | -1.862495 | 89  | 6 | 0 | 3.954373  | 0.113411  | 5.258681  |
| 34 | 6 | 0 | -5.053744 | 3.364628  | -0.586208 | 90  | 6 | 0 | 5.208187  | -0.188093 | 6.102594  |
| 35 | 6 | 0 | -5.058663 | 2.300623  | 0.507884  | 91  | 6 | 0 | 6.085774  | -1.314144 | 5.517360  |
| 36 | 6 | 0 | -4.520704 | 2.758430  | 1.865702  | 92  | 6 | 0 | 6.752628  | -0.946295 | 4.177803  |
| 37 | 6 | 0 | -5.892745 | -3.908847 | -1.025442 | 93  | 6 | 0 | 7.667070  | -2.070029 | 3.652483  |
| 38 | 6 | 0 | -6.299654 | -3.207100 | -2.307253 | 94  | 6 | 0 | 8.323107  | -1.709316 | 2.306303  |
| 39 | 6 | 0 | -6.096636 | -1.714743 | -2.142020 | 95  | 6 | 0 | 9.231111  | -2.837677 | 1.776305  |
| 40 | 6 | 0 | -6.802951 | -1.158515 | -0.921585 | 96  | 6 | 0 | 9.808208  | -2.532699 | 0.377100  |
| 41 | 6 | 0 | -6.425338 | -1.953736 | 0.326637  | 97  | 6 | 0 | 10.889922 | -1.434429 | 0.386751  |
| 42 | 6 | 0 | -7.348534 | -1.699728 | 1.526138  | 98  | 6 | 0 | 11.462659 | -1.184380 | -1.022655 |
| 43 | 8 | 0 | -2.693187 | -3.425260 | -2.878751 | 99  | 6 | 0 | -0.426531 | -1.943194 | 3.598495  |
| 44 | 8 | 0 | -2.226014 | -6.499902 | -0.881751 | 100 | 6 | 0 | -1.313179 | -3.154309 | 3.330747  |
| 45 | 8 | 0 | -4.494208 | -3.688591 | -0.896525 | 101 | 8 | 0 | -2.297893 | -3.432591 | 4.001556  |
| 46 | 8 | 0 | -1.768325 | -3.195546 | -0.270754 | 102 | 8 | 0 | -3.079977 | 0.950751  | 5.685543  |
| 47 | 8 | 0 | 2.474765  | -2.582717 | -5.802707 | 103 | 8 | 0 | -3.350090 | 1.956128  | 4.661594  |
| 48 | 8 | 0 | -0.080576 | -3.567843 | -4.538060 | 104 | 1 | 0 | -0.481516 | -4.756797 | -0.755430 |
| 49 | 8 | 0 | -0.181385 | -2.995515 | -1.796766 | 105 | 1 | 0 | -1.506828 | -5.071555 | -2.998605 |
| 50 | 8 | 0 | 3.392260  | -3.403830 | -2.341138 | 106 | 1 | 0 | -3.765440 | -5.790962 | -2.135249 |
| 51 | 8 | 0 | 4.224290  | 3.063947  | -4.628051 | 107 | 1 | 0 | -4.240985 | -5.394728 | 0.291977  |
| 52 | 8 | 0 | 3.465384  | 0.396803  | -5.585802 | 108 | 1 | 0 | -3.217174 | -3.186070 | 1.122190  |
| 53 | 8 | 0 | 3.419727  | -1.452470 | -3.584942 | 109 | 1 | 0 | -1.363955 | -5.600189 | 1.144963  |
| 54 | 8 | 0 | 6.155281  | 0.759655  | -2.535384 | 110 | 1 | 0 | -2.552647 | -5.157683 | 2.357208  |
| 55 | 8 | 0 | 6.830703  | -1.127613 | -0.757903 | 111 | 1 | 0 | 4.428113  | -3.201243 | -4.072243 |
| 56 | 8 | 0 | 2.156063  | 3.448478  | -2.824820 | 112 | 1 | 0 | 2.335717  | -4.314489 | -4.759015 |
| 57 | 8 | 0 | 4.185124  | 5.580171  | -0.597835 | 113 | 1 | 0 | 0.881187  | -1.848311 | -3.823801 |
| 58 | 8 | 0 | 4.454488  | 2.247245  | -1.972948 | 114 | 1 | 0 | 1.069478  | -4.533799 | -2.466722 |
| 59 | 8 | 0 | 2.363914  | 2.644848  | -0.166471 | 115 | 1 | 0 | 2.198203  | -1.850225 | -1.643056 |
| 60 | 8 | 0 | 2.968211  | 3.020174  | 2.508943  | 116 | 1 | 0 | 3.188643  | -3.110173 | 0.249658  |
| 61 | 8 | 0 | -3.333500 | 5.552257  | -2.993194 | 117 | 1 | 0 | 2.243820  | -4.519033 | -0.203993 |
| 62 | 8 | 0 | -0.398777 | 5.105127  | -2.938902 | 118 | 1 | 0 | 6.273348  | 2.756532  | -2.835583 |
| 63 | 8 | 0 | 0.436712  | 3.573513  | -0.776569 | 119 | 1 | 0 | 5.678675  | 1.686425  | -4.975578 |
| 64 | 8 | 0 | -2.538165 | 5.206706  | 0.568338  | 120 | 1 | 0 | 3.099886  | 0.927728  | -3.607128 |

|     |   |   |           |           |           |     |   |   |           |           |           |
|-----|---|---|-----------|-----------|-----------|-----|---|---|-----------|-----------|-----------|
| 121 | 1 | 0 | 5.240012  | -0.974620 | -4.482610 | 177 | 1 | 0 | -0.930487 | -0.661277 | 6.655431  |
| 122 | 1 | 0 | 4.506151  | -0.140202 | -1.650415 | 178 | 1 | 0 | 1.201373  | -0.500499 | 5.463267  |
| 123 | 1 | 0 | 6.825510  | -1.761567 | -2.745977 | 179 | 1 | 0 | 2.129084  | 1.796857  | 4.096543  |
| 124 | 1 | 0 | 5.529389  | -2.377822 | -1.711586 | 180 | 1 | 0 | 1.267144  | 2.329888  | 5.527755  |
| 125 | 1 | 0 | 1.863895  | 4.609787  | 0.297907  | 181 | 1 | 0 | 3.610074  | 2.071164  | 6.081061  |
| 126 | 1 | 0 | 2.011035  | 5.337922  | -2.074387 | 182 | 1 | 0 | 2.730130  | 0.808881  | 6.913248  |
| 127 | 1 | 0 | 4.436332  | 4.724752  | -2.503012 | 183 | 1 | 0 | 4.237139  | 0.489553  | 4.282927  |
| 128 | 1 | 0 | 5.583373  | 3.440873  | -0.669515 | 184 | 1 | 0 | 3.410797  | -0.814608 | 5.100290  |
| 129 | 1 | 0 | 4.036149  | 1.692051  | 0.397163  | 185 | 1 | 0 | 5.801211  | 0.717164  | 6.198075  |
| 130 | 1 | 0 | 3.826348  | 4.557002  | 1.378519  | 186 | 1 | 0 | 4.894705  | -0.471371 | 7.104017  |
| 131 | 1 | 0 | 4.898918  | 3.299928  | 1.938078  | 187 | 1 | 0 | 6.863209  | -1.561254 | 6.234734  |
| 132 | 1 | 0 | -4.169482 | 5.789541  | -0.468523 | 188 | 1 | 0 | 5.480315  | -2.206975 | 5.383778  |
| 133 | 1 | 0 | -2.149917 | 6.571825  | -1.698743 | 189 | 1 | 0 | 5.994674  | -0.735279 | 3.431142  |
| 134 | 1 | 0 | -1.661493 | 3.633317  | -2.150351 | 190 | 1 | 0 | 7.338721  | -0.040508 | 4.309780  |
| 135 | 1 | 0 | -0.089717 | 5.577263  | -0.481876 | 191 | 1 | 0 | 8.439061  | -2.278466 | 4.388667  |
| 136 | 1 | 0 | -1.788020 | 3.268816  | 0.516159  | 192 | 1 | 0 | 7.082382  | -2.978537 | 3.532945  |
| 137 | 1 | 0 | -1.549663 | 4.409705  | 2.683650  | 193 | 1 | 0 | 7.557803  | -1.509326 | 1.564851  |
| 138 | 1 | 0 | -0.341468 | 5.485015  | 1.991476  | 194 | 1 | 0 | 8.904299  | -0.801101 | 2.435051  |
| 139 | 1 | 0 | -8.048121 | 1.026121  | -0.199594 | 195 | 1 | 0 | 10.041518 | -3.020685 | 2.477437  |
| 140 | 1 | 0 | -7.637012 | 3.106560  | -1.439338 | 196 | 1 | 0 | 8.643817  | -3.750238 | 1.719616  |
| 141 | 1 | 0 | -4.953323 | 1.925731  | -2.147827 | 197 | 1 | 0 | 10.245560 | -3.439011 | -0.033890 |
| 142 | 1 | 0 | -5.681528 | 4.196123  | -0.289219 | 198 | 1 | 0 | 8.991861  | -2.234391 | -0.270184 |
| 143 | 1 | 0 | -4.491093 | 1.446248  | 0.177414  | 199 | 1 | 0 | 10.473852 | -0.509896 | 0.771538  |
| 144 | 1 | 0 | -5.124233 | 2.324380  | 2.648536  | 200 | 1 | 0 | 11.693183 | -1.728821 | 1.055793  |
| 145 | 1 | 0 | -4.539861 | 3.831362  | 1.955261  | 201 | 1 | 0 | 11.911714 | -2.089815 | -1.417325 |
| 146 | 1 | 0 | -6.118727 | -4.962887 | -1.059034 | 202 | 1 | 0 | 10.676259 | -0.874813 | -1.703620 |
| 147 | 1 | 0 | -7.339615 | -3.408493 | -2.510199 | 203 | 1 | 0 | 12.221601 | -0.409473 | -1.006688 |
| 148 | 1 | 0 | -5.042783 | -1.510872 | -2.025911 | 204 | 1 | 0 | -0.172351 | -1.501204 | 2.644910  |
| 149 | 1 | 0 | -7.871584 | -1.146026 | -1.081135 | 205 | 1 | 0 | 0.496420  | -2.274718 | 4.059243  |
| 150 | 1 | 0 | -5.391389 | -1.739735 | 0.549076  | 206 | 1 | 0 | -4.388440 | -0.376147 | 4.752094  |
| 151 | 1 | 0 | -6.854929 | -2.022225 | 2.434688  | 207 | 1 | 0 | -2.459968 | 2.058209  | 4.261874  |
| 152 | 1 | 0 | -8.222450 | -2.311720 | 1.378771  |     |   |   |           |           |           |
| 153 | 1 | 0 | -2.808982 | -2.723332 | -2.218263 |     |   |   |           |           |           |
| 154 | 1 | 0 | -2.126379 | -7.252374 | -1.478791 |     |   |   |           |           |           |
| 155 | 1 | 0 | 2.631695  | -1.631452 | -5.665373 |     |   |   |           |           |           |
| 156 | 1 | 0 | -0.927466 | -3.170929 | -4.281208 |     |   |   |           |           |           |
| 157 | 1 | 0 | 3.456393  | 3.231692  | -4.041270 |     |   |   |           |           |           |
| 158 | 1 | 0 | 3.187493  | 1.211971  | -6.028632 |     |   |   |           |           |           |
| 159 | 1 | 0 | 7.244928  | -0.269411 | -0.926675 |     |   |   |           |           |           |
| 160 | 1 | 0 | 2.028388  | 2.584598  | -2.401804 |     |   |   |           |           |           |
| 161 | 1 | 0 | 4.114830  | 6.457421  | -0.996248 |     |   |   |           |           |           |
| 162 | 1 | 0 | 2.048803  | 3.279333  | 2.290602  |     |   |   |           |           |           |
| 163 | 1 | 0 | -3.985945 | 4.827955  | -2.969542 |     |   |   |           |           |           |
| 164 | 1 | 0 | 0.212912  | 4.395193  | -3.185375 |     |   |   |           |           |           |
| 165 | 1 | 0 | -0.071605 | 2.750295  | 2.644783  |     |   |   |           |           |           |
| 166 | 1 | 0 | -7.119824 | 0.766756  | -2.998744 |     |   |   |           |           |           |
| 167 | 1 | 0 | -6.124808 | 3.489839  | -3.622249 |     |   |   |           |           |           |
| 168 | 1 | 0 | -3.057361 | 1.436113  | 2.215809  |     |   |   |           |           |           |
| 169 | 1 | 0 | -4.589279 | -3.607725 | -3.270144 |     |   |   |           |           |           |
| 170 | 1 | 0 | -6.340825 | -1.448847 | -4.101374 |     |   |   |           |           |           |
| 171 | 1 | 0 | -7.122624 | 0.304602  | 1.760214  |     |   |   |           |           |           |
| 172 | 1 | 0 | -0.114308 | -3.597951 | 1.733762  |     |   |   |           |           |           |
| 173 | 1 | 0 | 0.500444  | -2.488969 | -0.031487 |     |   |   |           |           |           |
| 174 | 1 | 0 | -3.230456 | -1.067534 | 7.120941  |     |   |   |           |           |           |
| 175 | 1 | 0 | -3.309289 | -2.316192 | 5.847742  |     |   |   |           |           |           |
| 176 | 1 | 0 | -0.984701 | -2.348719 | 6.133967  |     |   |   |           |           |           |

  

**(2S,5S)-4a-OOH (included)**

| Center Number | Atomic Number | Atomic Type | Coordinates (Angstroms) |           |           |
|---------------|---------------|-------------|-------------------------|-----------|-----------|
|               |               |             | X                       | Y         | Z         |
| 1             | 6             | 0           | -0.618979               | 3.223090  | 2.492468  |
| 2             | 6             | 0           | -0.631138               | 4.628357  | 1.910041  |
| 3             | 6             | 0           | 0.627408                | 5.364032  | 2.383156  |
| 4             | 6             | 0           | 1.885173                | 4.566586  | 2.079875  |
| 5             | 6             | 0           | 1.798412                | 3.123735  | 2.571688  |
| 6             | 6             | 0           | 1.985380                | 2.947306  | 4.085594  |
| 7             | 6             | 0           | -5.586990               | 1.414496  | 2.099997  |
| 8             | 6             | 0           | -5.259907               | 2.570339  | 1.168007  |
| 9             | 6             | 0           | -3.753878               | 2.644334  | 0.990920  |
| 10            | 6             | 0           | -3.029116               | 2.674934  | 2.336011  |
| 11            | 6             | 0           | -3.495905               | 1.600592  | 3.309884  |
| 12            | 6             | 0           | -3.153101               | 1.889468  | 4.776453  |
| 13            | 6             | 0           | -5.755877               | -3.236905 | -0.630800 |
| 14            | 6             | 0           | -5.742757               | -1.932382 | -1.444636 |
| 15            | 6             | 0           | -5.058031               | -0.879421 | -0.589350 |
| 16            | 6             | 0           | -5.934208               | -0.519360 | 0.595064  |
| 17            | 6             | 0           | -6.483276               | -1.810406 | 1.240151  |
| 18            | 6             | 0           | -7.984241               | -1.957836 | 1.005248  |
| 19            | 6             | 0           | -1.192656               | -4.959359 | -0.661702 |

|    |   |   |           |           |           |     |   |   |           |           |           |
|----|---|---|-----------|-----------|-----------|-----|---|---|-----------|-----------|-----------|
| 20 | 6 | 0 | -2.090145 | -5.089352 | -1.884722 | 76  | 7 | 0 | 2.400041  | 1.577039  | 4.389496  |
| 21 | 6 | 0 | -3.387656 | -5.783297 | -1.484577 | 77  | 8 | 0 | -1.813892 | 2.339798  | 4.995632  |
| 22 | 6 | 0 | -4.089949 | -5.060381 | -0.343300 | 78  | 6 | 0 | 5.365859  | -2.105279 | 3.548431  |
| 23 | 6 | 0 | -3.166184 | -4.729815 | 0.820775  | 79  | 7 | 0 | 4.392298  | -1.049748 | 3.786725  |
| 24 | 6 | 0 | -2.886866 | -5.878518 | 1.782922  | 80  | 8 | 0 | 4.805906  | 0.198296  | 3.938928  |
| 25 | 6 | 0 | 3.438319  | -3.724819 | -2.998585 | 81  | 6 | 0 | 3.234922  | -2.968437 | 4.335458  |
| 26 | 6 | 0 | 2.265881  | -4.136186 | -3.876148 | 82  | 6 | 0 | 2.996757  | -1.486751 | 3.915309  |
| 27 | 6 | 0 | 0.977506  | -3.896861 | -3.095060 | 83  | 6 | 0 | 4.521122  | -3.386634 | 3.588822  |
| 28 | 6 | 0 | 1.029545  | -4.629815 | -1.753074 | 84  | 8 | 0 | 2.924991  | -1.774782 | 1.516466  |
| 29 | 6 | 0 | 2.296952  | -4.324816 | -0.971782 | 85  | 6 | 0 | 2.287057  | -1.547436 | 2.547481  |
| 30 | 6 | 0 | 2.558214  | -5.269532 | 0.187089  | 86  | 7 | 0 | 0.958598  | -1.491783 | 2.609978  |
| 31 | 6 | 0 | 5.104739  | 1.423357  | -2.852323 | 87  | 6 | 0 | 0.041692  | -1.854359 | 1.508756  |
| 32 | 6 | 0 | 4.457755  | 0.846023  | -4.096734 | 88  | 6 | 0 | 2.249870  | -0.743916 | 5.039354  |
| 33 | 6 | 0 | 3.491024  | -0.255900 | -3.730769 | 89  | 6 | 0 | 1.574425  | 0.582152  | 4.691195  |
| 34 | 6 | 0 | 4.214839  | -1.345353 | -2.950494 | 90  | 8 | 0 | 0.342881  | 0.654372  | 4.739341  |
| 35 | 6 | 0 | 4.785514  | -0.713448 | -1.678743 | 91  | 6 | 0 | -0.410762 | -0.652406 | 0.663037  |
| 36 | 6 | 0 | 5.695107  | -1.598282 | -0.833969 | 92  | 6 | 0 | 0.620339  | -0.278903 | -0.420751 |
| 37 | 6 | 0 | 2.827361  | 5.374603  | -0.047156 | 93  | 6 | 0 | 0.327035  | 1.084139  | -1.072920 |
| 38 | 6 | 0 | 2.419498  | 5.286566  | -1.500416 | 94  | 6 | 0 | -0.995466 | 1.140256  | -1.859337 |
| 39 | 6 | 0 | 2.665710  | 3.882789  | -1.995438 | 95  | 6 | 0 | -1.303126 | 2.570815  | -2.352417 |
| 40 | 6 | 0 | 4.111824  | 3.464604  | -1.807228 | 96  | 6 | 0 | -2.758375 | 2.718883  | -2.837824 |
| 41 | 6 | 0 | 4.566473  | 3.680166  | -0.365737 | 97  | 6 | 0 | -3.197723 | 4.186190  | -3.021553 |
| 42 | 6 | 0 | 6.092069  | 3.680919  | -0.202071 | 98  | 6 | 0 | -4.735212 | 4.309908  | -3.044778 |
| 43 | 8 | 0 | -0.797204 | 4.632690  | 0.493394  | 99  | 6 | 0 | -5.233458 | 5.756288  | -3.241765 |
| 44 | 8 | 0 | 0.622141  | 5.457655  | 3.820359  | 100 | 6 | 0 | -4.978566 | 6.314854  | -4.655398 |
| 45 | 8 | 0 | 1.979671  | 4.476221  | 0.640467  | 101 | 6 | 0 | -5.535745 | 7.743105  | -4.818252 |
| 46 | 8 | 0 | 0.573723  | 2.528983  | 2.112726  | 102 | 1 | 0 | -0.703328 | 3.288307  | 3.554213  |
| 47 | 8 | 0 | -5.970799 | 2.389371  | -0.061824 | 103 | 1 | 0 | -1.487863 | 5.149658  | 2.318660  |
| 48 | 8 | 0 | -3.462377 | 3.840535  | 0.263366  | 104 | 1 | 0 | 0.679379  | 6.338152  | 1.912653  |
| 49 | 8 | 0 | -1.650097 | 2.414286  | 1.973390  | 105 | 1 | 0 | 2.755837  | 5.057167  | 2.491060  |
| 50 | 8 | 0 | -4.948221 | 1.585338  | 3.341731  | 106 | 1 | 0 | 2.578426  | 2.575335  | 2.068995  |
| 51 | 8 | 0 | -5.029441 | -2.068708 | -2.677877 | 107 | 1 | 0 | 1.087925  | 3.177958  | 4.627223  |
| 52 | 8 | 0 | -4.842449 | 0.299920  | -1.384369 | 108 | 1 | 0 | 2.764422  | 3.608875  | 4.437213  |
| 53 | 8 | 0 | -5.105287 | 0.189616  | 1.528496  | 109 | 1 | 0 | -6.648467 | 1.357214  | 2.289297  |
| 54 | 8 | 0 | -5.762059 | -2.970965 | 0.764466  | 110 | 1 | 0 | -5.606829 | 3.488737  | 1.614254  |
| 55 | 8 | 0 | -8.350079 | -3.280834 | 1.423291  | 111 | 1 | 0 | -3.421915 | 1.761359  | 0.468230  |
| 56 | 8 | 0 | -2.328729 | -3.774267 | -2.430920 | 112 | 1 | 0 | -3.152262 | 3.658262  | 2.768874  |
| 57 | 8 | 0 | -3.051287 | -7.093149 | -0.980653 | 113 | 1 | 0 | -3.122334 | 0.648799  | 2.970519  |
| 58 | 8 | 0 | -4.513497 | -3.822634 | -0.949902 | 114 | 1 | 0 | -3.389144 | 1.012581  | 5.367450  |
| 59 | 8 | 0 | -1.895763 | -4.201183 | 0.327145  | 115 | 1 | 0 | -3.804467 | 2.689426  | 5.091267  |
| 60 | 8 | 0 | -1.951069 | -5.423830 | 2.778414  | 116 | 1 | 0 | -6.571717 | -3.898704 | -0.878451 |
| 61 | 8 | 0 | 2.307367  | -3.469576 | -5.125374 | 117 | 1 | 0 | -6.740090 | -1.608461 | -1.697824 |
| 62 | 8 | 0 | -0.114076 | -4.397321 | -3.875871 | 118 | 1 | 0 | -4.120574 | -1.264441 | -0.218037 |
| 63 | 8 | 0 | -0.059196 | -4.155118 | -0.913794 | 119 | 1 | 0 | -6.733421 | 0.120547  | 0.251555  |
| 64 | 8 | 0 | 3.440477  | -4.530374 | -1.840489 | 120 | 1 | 0 | -6.280988 | -1.784767 | 2.295339  |
| 65 | 8 | 0 | 3.814181  | -4.936359 | 0.798118  | 121 | 1 | 0 | -8.232490 | -1.801721 | -0.039071 |
| 66 | 8 | 0 | 3.664994  | 1.845831  | -4.784749 | 122 | 1 | 0 | -8.488236 | -1.188885 | 1.581269  |
| 67 | 8 | 0 | 2.969754  | -0.828901 | -4.941316 | 123 | 1 | 0 | -0.919784 | -5.937237 | -0.297901 |
| 68 | 8 | 0 | 3.246624  | -2.348368 | -2.646919 | 124 | 1 | 0 | -1.586186 | -5.647150 | -2.653689 |
| 69 | 8 | 0 | 5.683783  | 0.357851  | -2.107210 | 125 | 1 | 0 | -4.060839 | -5.828859 | -2.328534 |
| 70 | 8 | 0 | 4.984663  | -2.643660 | -0.144834 | 126 | 1 | 0 | -4.938789 | -5.635053 | 0.000218  |
| 71 | 8 | 0 | 1.016672  | 5.578708  | -1.552993 | 127 | 1 | 0 | -3.602954 | -3.912074 | 1.364287  |
| 72 | 8 | 0 | 2.284773  | 3.885792  | -3.377556 | 128 | 1 | 0 | -2.524179 | -6.746823 | 1.257862  |
| 73 | 8 | 0 | 4.094188  | 2.041523  | -2.085649 | 129 | 1 | 0 | -3.796819 | -6.140453 | 2.300780  |
| 74 | 8 | 0 | 4.189482  | 5.005677  | 0.091309  | 130 | 1 | 0 | 4.381313  | -3.865954 | -3.501091 |
| 75 | 8 | 0 | 6.755893  | 2.755428  | -1.072604 | 131 | 1 | 0 | 2.351873  | -5.192567 | -4.078697 |

|     |   |   |           |           |           |     |   |   |           |           |           |
|-----|---|---|-----------|-----------|-----------|-----|---|---|-----------|-----------|-----------|
| 132 | 1 | 0 | 0.877427  | -2.840443 | -2.897568 | 188 | 1 | 0 | -0.960492 | 0.450093  | -2.699868 |
| 133 | 1 | 0 | 0.939900  | -5.693561 | -1.940493 | 189 | 1 | 0 | -0.598116 | 2.858937  | -3.129441 |
| 134 | 1 | 0 | 2.288136  | -3.307369 | -0.625452 | 190 | 1 | 0 | -1.158403 | 3.241738  | -1.515981 |
| 135 | 1 | 0 | 2.575208  | -6.286277 | -0.187285 | 191 | 1 | 0 | -2.902644 | 2.171067  | -3.766530 |
| 136 | 1 | 0 | 1.782145  | -5.171695 | 0.930077  | 192 | 1 | 0 | -3.400059 | 2.272040  | -2.091112 |
| 137 | 1 | 0 | 5.904816  | 2.104422  | -3.068164 | 193 | 1 | 0 | -2.758231 | 4.592690  | -3.926815 |
| 138 | 1 | 0 | 5.216099  | 0.442769  | -4.753456 | 194 | 1 | 0 | -2.835648 | 4.763691  | -2.179259 |
| 139 | 1 | 0 | 2.696352  | 0.147153  | -3.123427 | 195 | 1 | 0 | -5.144078 | 3.681153  | -3.833232 |
| 140 | 1 | 0 | 5.019572  | -1.751548 | -3.551954 | 196 | 1 | 0 | -5.102522 | 3.936924  | -2.094921 |
| 141 | 1 | 0 | 3.981995  | -0.309863 | -1.082679 | 197 | 1 | 0 | -4.755728 | 6.399217  | -2.507529 |
| 142 | 1 | 0 | 6.204425  | -0.965772 | -0.123122 | 198 | 1 | 0 | -6.301981 | 5.790312  | -3.046040 |
| 143 | 1 | 0 | 6.428356  | -2.074891 | -1.465685 | 199 | 1 | 0 | -5.445616 | 5.659418  | -5.384897 |
| 144 | 1 | 0 | 2.744804  | 6.376714  | 0.341084  | 200 | 1 | 0 | -3.914694 | 6.321428  | -4.863365 |
| 145 | 1 | 0 | 2.994404  | 5.991391  | -2.085375 | 201 | 1 | 0 | -6.606070 | 7.756840  | -4.640038 |
| 146 | 1 | 0 | 2.053116  | 3.212099  | -1.421754 | 202 | 1 | 0 | -5.067619 | 8.416748  | -4.107838 |
| 147 | 1 | 0 | 4.751087  | 3.985881  | -2.506565 | 203 | 1 | 0 | -5.353700 | 8.124724  | -5.817539 |
| 148 | 1 | 0 | 4.084334  | 2.925818  | 0.235610  | 204 | 1 | 0 | 6.129148  | -2.073594 | 4.307204  |
| 149 | 1 | 0 | 6.351228  | 3.520119  | 0.836542  | 205 | 8 | 0 | 5.968644  | -1.819929 | 2.275053  |
| 150 | 1 | 0 | 6.434241  | 4.660025  | -0.492042 | 206 | 8 | 0 | 6.669078  | -3.042419 | 1.868700  |
| 151 | 1 | 0 | 0.022921  | 4.749573  | -0.017535 | 207 | 1 | 0 | 6.159498  | -3.199925 | 1.040660  |
| 152 | 1 | 0 | -0.114227 | 5.986477  | 4.153931  |     |   |   |           |           |           |
| 153 | 1 | 0 | -5.480202 | 1.809894  | -0.673286 |     |   |   |           |           |           |
| 154 | 1 | 0 | -2.501932 | 4.001936  | 0.195606  |     |   |   |           |           |           |
| 155 | 1 | 0 | -4.348592 | -2.758039 | -2.590502 |     |   |   |           |           |           |
| 156 | 1 | 0 | -4.579545 | 0.033014  | -2.279084 |     |   |   |           |           |           |
| 157 | 1 | 0 | -9.310323 | -3.377580 | 1.462873  |     |   |   |           |           |           |
| 158 | 1 | 0 | -2.308516 | -3.136603 | -1.701239 |     |   |   |           |           |           |
| 159 | 1 | 0 | -2.926348 | -7.735751 | -1.690715 |     |   |   |           |           |           |
| 160 | 1 | 0 | -1.272557 | -4.895668 | 2.335247  |     |   |   |           |           |           |
| 161 | 1 | 0 | 2.432500  | -2.507716 | -5.021265 |     |   |   |           |           |           |
| 162 | 1 | 0 | -0.926726 | -3.908443 | -3.666370 |     |   |   |           |           |           |
| 163 | 1 | 0 | 4.388813  | -4.544988 | 0.120796  |     |   |   |           |           |           |
| 164 | 1 | 0 | 4.190584  | 2.382131  | -5.393148 |     |   |   |           |           |           |
| 165 | 1 | 0 | 2.530005  | -0.144234 | -5.464251 |     |   |   |           |           |           |
| 166 | 1 | 0 | 4.312468  | -2.287627 | 0.475846  |     |   |   |           |           |           |
| 167 | 1 | 0 | 0.667526  | 5.309804  | -2.416267 |     |   |   |           |           |           |
| 168 | 1 | 0 | 2.555377  | 3.059891  | -3.816272 |     |   |   |           |           |           |
| 169 | 1 | 0 | 6.582874  | 1.828128  | -0.855818 |     |   |   |           |           |           |
| 170 | 1 | 0 | 3.371906  | 1.347551  | 4.302230  |     |   |   |           |           |           |
| 171 | 1 | 0 | -1.141386 | 1.639233  | 4.907029  |     |   |   |           |           |           |
| 172 | 1 | 0 | 4.284495  | -3.724307 | 2.594728  |     |   |   |           |           |           |
| 173 | 1 | 0 | 5.039994  | -4.178528 | 4.106701  |     |   |   |           |           |           |
| 174 | 1 | 0 | 3.394001  | -2.990783 | 5.407336  |     |   |   |           |           |           |
| 175 | 1 | 0 | 2.387398  | -3.592258 | 4.092277  |     |   |   |           |           |           |
| 176 | 1 | 0 | 0.512865  | -1.091297 | 3.408765  |     |   |   |           |           |           |
| 177 | 1 | 0 | 0.510622  | -2.596159 | 0.887581  |     |   |   |           |           |           |
| 178 | 1 | 0 | 1.465695  | -1.381667 | 5.418523  |     |   |   |           |           |           |
| 179 | 1 | 0 | 2.963391  | -0.577004 | 5.835709  |     |   |   |           |           |           |
| 180 | 1 | 0 | -0.816899 | -2.318259 | 1.973609  |     |   |   |           |           |           |
| 181 | 1 | 0 | -0.597802 | 0.204252  | 1.297649  |     |   |   |           |           |           |
| 182 | 1 | 0 | -1.348089 | -0.926365 | 0.190688  |     |   |   |           |           |           |
| 183 | 1 | 0 | 1.602879  | -0.249769 | 0.032715  |     |   |   |           |           |           |
| 184 | 1 | 0 | 0.644609  | -1.062541 | -1.173215 |     |   |   |           |           |           |
| 185 | 1 | 0 | 0.305214  | 1.832695  | -0.289345 |     |   |   |           |           |           |
| 186 | 1 | 0 | 1.141505  | 1.332253  | -1.746808 |     |   |   |           |           |           |
| 187 | 1 | 0 | -1.809102 | 0.828061  | -1.215178 |     |   |   |           |           |           |

**(2R,5S)-4a-OOH (excluded)**

| Center Number | Atomic Number | Atomic Type | Coordinates (Angstroms) |           |           |
|---------------|---------------|-------------|-------------------------|-----------|-----------|
|               |               |             | X                       | Y         | Z         |
| 1             | 6             | 0           | -1.028610               | -4.037647 | -1.072352 |
| 2             | 6             | 0           | -1.963504               | -4.504158 | -2.173681 |
| 3             | 6             | 0           | -3.063851               | -5.353015 | -1.532338 |
| 4             | 6             | 0           | -3.773695               | -4.617882 | -0.393632 |
| 5             | 6             | 0           | -2.814081               | -3.961803 | 0.598734  |
| 6             | 6             | 0           | -2.163834               | -4.886651 | 1.644457  |
| 7             | 6             | 0           | 3.643490                | -2.946101 | -3.254315 |
| 8             | 6             | 0           | 2.517517                | -3.364601 | -4.202177 |
| 9             | 6             | 0           | 1.175453                | -3.024017 | -3.567372 |
| 10            | 6             | 0           | 1.134729                | -3.553272 | -2.145711 |
| 11            | 6             | 0           | 2.274694                | -3.019568 | -1.303522 |
| 12            | 6             | 0           | 2.269833                | -3.534219 | 0.130643  |
| 13            | 6             | 0           | 5.577993                | 1.984504  | -2.700603 |
| 14            | 6             | 0           | 4.925840                | 1.775780  | -4.058189 |
| 15            | 6             | 0           | 3.981225                | 0.588984  | -3.979189 |
| 16            | 6             | 0           | 4.648657                | -0.646722 | -3.418427 |
| 17            | 6             | 0           | 5.361828                | -0.347811 | -2.108958 |
| 18            | 6             | 0           | 6.274767                | -1.467170 | -1.636518 |
| 19            | 6             | 0           | 1.839994                | 4.002796  | -0.394229 |
| 20            | 6             | 0           | 2.462970                | 4.396219  | -1.729738 |
| 21            | 6             | 0           | 3.971580                | 4.581291  | -1.583434 |
| 22            | 6             | 0           | 4.625882                | 3.395483  | -0.870702 |
| 23            | 6             | 0           | 3.874759                | 2.955861  | 0.384183  |
| 24            | 6             | 0           | 4.066311                | 3.868962  | 1.600984  |
| 25            | 6             | 0           | -3.245507               | 5.248750  | -0.395877 |
| 26            | 6             | 0           | -2.494516               | 5.539817  | -1.695464 |
| 27            | 6             | 0           | -1.308701               | 4.589304  | -1.766341 |
| 28            | 6             | 0           | -0.493276               | 4.674287  | -0.484793 |
| 29            | 6             | 0           | -1.316698               | 4.447028  | 0.761622  |
| 30            | 6             | 0           | -0.598595               | 4.702007  | 2.077606  |

|    |   |   |           |           |           |     |   |   |           |           |           |
|----|---|---|-----------|-----------|-----------|-----|---|---|-----------|-----------|-----------|
| 31 | 6 | 0 | -6.953777 | 1.366056  | 0.078343  | 87  | 6 | 0 | 1.689165  | 1.391877  | 4.186616  |
| 32 | 6 | 0 | -6.997411 | 2.329189  | -1.092777 | 88  | 6 | 0 | 2.844920  | 1.264128  | 5.182311  |
| 33 | 6 | 0 | -5.601968 | 2.858426  | -1.359398 | 89  | 6 | 0 | 3.796733  | 0.097845  | 4.853360  |
| 34 | 6 | 0 | -5.003684 | 3.494772  | -0.117479 | 90  | 6 | 0 | 4.981877  | 0.017918  | 5.835714  |
| 35 | 6 | 0 | -4.987374 | 2.462511  | 1.009273  | 91  | 6 | 0 | 5.977041  | -1.110776 | 5.489511  |
| 36 | 6 | 0 | -4.601111 | 2.953385  | 2.406339  | 92  | 6 | 0 | 6.787503  | -0.824139 | 4.211161  |
| 37 | 6 | 0 | -5.818448 | -3.665129 | -1.448380 | 93  | 6 | 0 | 7.740312  | -1.972721 | 3.828967  |
| 38 | 6 | 0 | -5.999792 | -2.653318 | -2.559803 | 94  | 6 | 0 | 8.496946  | -1.664757 | 2.522986  |
| 39 | 6 | 0 | -5.736057 | -1.270536 | -1.992753 | 95  | 6 | 0 | 9.379432  | -2.836335 | 2.048942  |
| 40 | 6 | 0 | -6.658219 | -0.946515 | -0.830579 | 96  | 6 | 0 | 10.012245 | -2.573000 | 0.664929  |
| 41 | 6 | 0 | -6.605610 | -2.067285 | 0.218073  | 97  | 6 | 0 | 11.138701 | -1.521259 | 0.696879  |
| 42 | 6 | 0 | -7.792552 | -2.088504 | 1.164052  | 98  | 6 | 0 | 11.763436 | -1.309881 | -0.696606 |
| 43 | 8 | 0 | -2.485710 | -3.325496 | -2.826919 | 99  | 6 | 0 | -0.413640 | -2.357928 | 3.798877  |
| 44 | 8 | 0 | -2.428994 | -6.500115 | -0.930632 | 100 | 6 | 0 | -1.365708 | -3.515026 | 3.510692  |
| 45 | 8 | 0 | -4.475645 | -3.517992 | -1.018986 | 101 | 8 | 0 | -2.275048 | -3.827077 | 4.266396  |
| 46 | 8 | 0 | -1.792368 | -3.263428 | -0.163682 | 102 | 8 | 0 | -4.600863 | -1.126423 | 2.867015  |
| 47 | 8 | 0 | 2.736551  | -2.719663 | -5.451818 | 103 | 8 | 0 | -5.674137 | -0.222304 | 3.305852  |
| 48 | 8 | 0 | 0.119800  | -3.655316 | -4.306676 | 104 | 1 | 0 | -0.541528 | -4.873004 | -0.599427 |
| 49 | 8 | 0 | -0.100606 | -3.089043 | -1.561121 | 105 | 1 | 0 | -1.428730 | -5.063904 | -2.922168 |
| 50 | 8 | 0 | 3.492504  | -3.476909 | -1.937930 | 106 | 1 | 0 | -3.791625 | -5.640666 | -2.280036 |
| 51 | 8 | 0 | 4.215961  | 2.941865  | -4.479768 | 107 | 1 | 0 | -4.459306 | -5.282401 | 0.113236  |
| 52 | 8 | 0 | 3.493156  | 0.220342  | -5.282407 | 108 | 1 | 0 | -3.337308 | -3.174370 | 1.112835  |
| 53 | 8 | 0 | 3.545723  | -1.534113 | -3.185415 | 109 | 1 | 0 | -1.751512 | -5.770958 | 1.188672  |
| 54 | 8 | 0 | 6.246887  | 0.788077  | -2.319515 | 110 | 1 | 0 | -2.903748 | -5.177118 | 2.374771  |
| 55 | 8 | 0 | 7.022987  | -1.020079 | -0.492879 | 111 | 1 | 0 | 4.603106  | -3.269247 | -3.621453 |
| 56 | 8 | 0 | 2.169256  | 3.340028  | -2.679111 | 112 | 1 | 0 | 2.555699  | -4.427547 | -4.379228 |
| 57 | 8 | 0 | 4.207852  | 5.726995  | -0.741160 | 113 | 1 | 0 | 1.060027  | -1.949769 | -3.539504 |
| 58 | 8 | 0 | 4.535761  | 2.277196  | -1.785186 | 114 | 1 | 0 | 1.171056  | -4.635272 | -2.170342 |
| 59 | 8 | 0 | 2.475772  | 2.809904  | 0.045383  | 115 | 1 | 0 | 2.243091  | -1.942231 | -1.300183 |
| 60 | 8 | 0 | 3.203788  | 3.456321  | 2.665034  | 116 | 1 | 0 | 3.162305  | -3.193328 | 0.631216  |
| 61 | 8 | 0 | -3.361685 | 5.441571  | -2.815697 | 117 | 1 | 0 | 2.261618  | -4.614724 | 0.133480  |
| 62 | 8 | 0 | -0.442278 | 4.966327  | -2.851716 | 118 | 1 | 0 | 6.319125  | 2.767289  | -2.728341 |
| 63 | 8 | 0 | 0.504747  | 3.637257  | -0.601930 | 119 | 1 | 0 | 5.692495  | 1.577938  | -4.790647 |
| 64 | 8 | 0 | -2.389174 | 5.420045  | 0.717601  | 120 | 1 | 0 | 3.162633  | 0.838879  | -3.323128 |
| 65 | 8 | 0 | 0.466962  | 3.740612  | 2.282889  | 121 | 1 | 0 | 5.326884  | -1.053996 | -4.157280 |
| 66 | 8 | 0 | -7.546372 | 1.749492  | -2.278798 | 122 | 1 | 0 | 4.638030  | -0.099644 | -1.351809 |
| 67 | 8 | 0 | -5.658581 | 3.879515  | -2.375776 | 123 | 1 | 0 | 6.940470  | -1.748891 | -2.444338 |
| 68 | 8 | 0 | -3.679551 | 3.892771  | -0.488603 | 124 | 1 | 0 | 5.689684  | -2.318512 | -1.331114 |
| 69 | 8 | 0 | -6.368841 | 2.027972  | 1.183319  | 125 | 1 | 0 | 1.940407  | 4.798628  | 0.321489  |
| 70 | 8 | 0 | -3.187078 | 3.134089  | 2.591175  | 126 | 1 | 0 | 1.995671  | 5.289341  | -2.110397 |
| 71 | 8 | 0 | -5.144526 | -2.888317 | -3.678747 | 127 | 1 | 0 | 4.422210  | 4.692925  | -2.560137 |
| 72 | 8 | 0 | -5.960736 | -0.293366 | -3.031050 | 128 | 1 | 0 | 5.657146  | 3.630179  | -0.643293 |
| 73 | 8 | 0 | -6.119501 | 0.251455  | -0.247514 | 129 | 1 | 0 | 4.193514  | 1.959168  | 0.640052  |
| 74 | 8 | 0 | -6.727831 | -3.372860 | -0.408576 | 130 | 1 | 0 | 3.925347  | 4.903096  | 1.335285  |
| 75 | 8 | 0 | -7.840232 | -0.809117 | 1.838414  | 131 | 1 | 0 | 5.082022  | 3.753763  | 1.952852  |
| 76 | 7 | 0 | -1.135099 | -4.112938 | 2.325729  | 132 | 1 | 0 | -4.083439 | 5.914636  | -0.266317 |
| 77 | 8 | 0 | 1.109960  | -3.039866 | 0.852555  | 133 | 1 | 0 | -2.118951 | 6.551593  | -1.654688 |
| 78 | 6 | 0 | -3.430198 | -0.299606 | 3.074119  | 134 | 1 | 0 | -1.676131 | 3.580824  | -1.881807 |
| 79 | 7 | 0 | -2.242397 | -1.062714 | 2.737132  | 135 | 1 | 0 | -0.029878 | 5.653408  | -0.451780 |
| 80 | 8 | 0 | -1.772609 | -0.966806 | 1.458070  | 136 | 1 | 0 | -1.723658 | 3.455924  | 0.752629  |
| 81 | 6 | 0 | -2.129410 | -0.874468 | 5.049410  | 137 | 1 | 0 | -1.335527 | 4.638001  | 2.860727  |
| 82 | 6 | 0 | -1.235344 | -1.051804 | 3.802551  | 138 | 1 | 0 | -0.145507 | 5.681376  | 2.078652  |
| 83 | 6 | 0 | -3.242248 | 0.073905  | 4.554396  | 139 | 1 | 0 | -7.928947 | 1.038383  | 0.379338  |
| 84 | 8 | 0 | -0.826050 | 1.192595  | 3.008062  | 140 | 1 | 0 | -7.637475 | 3.155450  | -0.822889 |
| 85 | 6 | 0 | -0.388690 | 0.216832  | 3.635601  | 141 | 1 | 0 | -4.967005 | 2.045029  | -1.678631 |
| 86 | 7 | 0 | 0.782454  | 0.229265  | 4.260447  | 142 | 1 | 0 | -5.598952 | 4.351867  | 0.171848  |

|     |   |   |           |           |           |     |   |   |           |           |           |
|-----|---|---|-----------|-----------|-----------|-----|---|---|-----------|-----------|-----------|
| 143 | 1 | 0 | -4.376812 | 1.625090  | 0.713343  | 199 | 1 | 0 | 10.750575 | -0.576501 | 1.060807  |
| 144 | 1 | 0 | -5.009363 | 2.230232  | 3.095991  | 200 | 1 | 0 | 11.908233 | -1.842871 | 1.392514  |
| 145 | 1 | 0 | -5.053469 | 3.913449  | 2.598053  | 201 | 1 | 0 | 12.184657 | -2.237543 | -1.069890 |
| 146 | 1 | 0 | -6.029317 | -4.672258 | -1.771318 | 202 | 1 | 0 | 11.011728 | -0.973387 | -1.403406 |
| 147 | 1 | 0 | -7.015593 | -2.706555 | -2.919681 | 203 | 1 | 0 | 12.554285 | -0.568063 | -0.664167 |
| 148 | 1 | 0 | -4.720680 | -1.208546 | -1.637414 | 204 | 1 | 0 | 0.360030  | -2.315255 | 3.047996  |
| 149 | 1 | 0 | -7.662750 | -0.789956 | -1.200284 | 205 | 1 | 0 | 0.026004  | -2.508461 | 4.777076  |
| 150 | 1 | 0 | -5.680650 | -1.979043 | 0.761919  | 206 | 1 | 0 | -3.511368 | 0.544984  | 2.427408  |
| 151 | 1 | 0 | -7.662359 | -2.896368 | 1.868986  | 207 | 1 | 0 | -6.350102 | -0.322278 | 2.599179  |
| 152 | 1 | 0 | -8.694319 | -2.252957 | 0.591501  |     |   |   |           |           |           |
| 153 | 1 | 0 | -2.525151 | -2.622417 | -2.157042 |     |   |   |           |           |           |
| 154 | 1 | 0 | -2.301826 | -7.223258 | -1.558043 |     |   |   |           |           |           |
| 155 | 1 | 0 | 2.828628  | -1.755682 | -5.343407 |     |   |   |           |           |           |
| 156 | 1 | 0 | -0.730061 | -3.230759 | -4.110224 |     |   |   |           |           |           |
| 157 | 1 | 0 | 3.440702  | 3.103871  | -3.900186 |     |   |   |           |           |           |
| 158 | 1 | 0 | 3.193573  | 1.006833  | -5.761206 |     |   |   |           |           |           |
| 159 | 1 | 0 | 7.417485  | -0.164279 | -0.713167 |     |   |   |           |           |           |
| 160 | 1 | 0 | 2.076220  | 2.517521  | -2.172873 |     |   |   |           |           |           |
| 161 | 1 | 0 | 4.109787  | 6.558142  | -1.223627 |     |   |   |           |           |           |
| 162 | 1 | 0 | 2.261542  | 3.647720  | 2.475220  |     |   |   |           |           |           |
| 163 | 1 | 0 | -4.072522 | 4.788522  | -2.675182 |     |   |   |           |           |           |
| 164 | 1 | 0 | 0.159999  | 4.234895  | -3.054311 |     |   |   |           |           |           |
| 165 | 1 | 0 | 0.099370  | 2.844409  | 2.389684  |     |   |   |           |           |           |
| 166 | 1 | 0 | -6.969604 | 1.039742  | -2.632354 |     |   |   |           |           |           |
| 167 | 1 | 0 | -6.269612 | 3.605221  | -3.075240 |     |   |   |           |           |           |
| 168 | 1 | 0 | -2.676148 | 2.317177  | 2.665707  |     |   |   |           |           |           |
| 169 | 1 | 0 | -4.227103 | -3.090198 | -3.406344 |     |   |   |           |           |           |
| 170 | 1 | 0 | -5.585925 | -0.620100 | -3.863199 |     |   |   |           |           |           |
| 171 | 1 | 0 | -8.548218 | -0.766205 | 2.494278  |     |   |   |           |           |           |
| 172 | 1 | 0 | -0.339020 | -3.822314 | 1.788998  |     |   |   |           |           |           |
| 173 | 1 | 0 | 0.500575  | -2.548167 | 0.279003  |     |   |   |           |           |           |
| 174 | 1 | 0 | -2.927211 | 1.104255  | 4.622175  |     |   |   |           |           |           |
| 175 | 1 | 0 | -4.168493 | -0.055952 | 5.084761  |     |   |   |           |           |           |
| 176 | 1 | 0 | -2.536385 | -1.843024 | 5.293533  |     |   |   |           |           |           |
| 177 | 1 | 0 | -1.573233 | -0.475417 | 5.886063  |     |   |   |           |           |           |
| 178 | 1 | 0 | 1.098467  | -0.578829 | 4.746643  |     |   |   |           |           |           |
| 179 | 1 | 0 | 2.089870  | 1.481274  | 3.190670  |     |   |   |           |           |           |
| 180 | 1 | 0 | 1.116136  | 2.284083  | 4.387988  |     |   |   |           |           |           |
| 181 | 1 | 0 | 3.400719  | 2.191422  | 5.118116  |     |   |   |           |           |           |
| 182 | 1 | 0 | 2.457699  | 1.164229  | 6.192070  |     |   |   |           |           |           |
| 183 | 1 | 0 | 4.160823  | 0.236079  | 3.842588  |     |   |   |           |           |           |
| 184 | 1 | 0 | 3.267414  | -0.851732 | 4.877600  |     |   |   |           |           |           |
| 185 | 1 | 0 | 5.506500  | 0.969139  | 5.841522  |     |   |   |           |           |           |
| 186 | 1 | 0 | 4.593436  | -0.139587 | 6.838165  |     |   |   |           |           |           |
| 187 | 1 | 0 | 6.667152  | -1.245088 | 6.317484  |     |   |   |           |           |           |
| 188 | 1 | 0 | 5.433504  | -2.044718 | 5.371936  |     |   |   |           |           |           |
| 189 | 1 | 0 | 6.114380  | -0.650107 | 3.379226  |     |   |   |           |           |           |
| 190 | 1 | 0 | 7.363080  | 0.086505  | 4.355078  |     |   |   |           |           |           |
| 191 | 1 | 0 | 8.447643  | -2.147177 | 4.635428  |     |   |   |           |           |           |
| 192 | 1 | 0 | 7.163154  | -2.884944 | 3.701448  |     |   |   |           |           |           |
| 193 | 1 | 0 | 7.784602  | -1.438812 | 1.738304  |     |   |   |           |           |           |
| 194 | 1 | 0 | 9.109834  | -0.781477 | 2.676402  |     |   |   |           |           |           |
| 195 | 1 | 0 | 10.158330 | -3.038900 | 2.779685  |     |   |   |           |           |           |
| 196 | 1 | 0 | 8.759819  | -3.726743 | 1.984642  |     |   |   |           |           |           |
| 197 | 1 | 0 | 10.421973 | -3.501245 | 0.275029  |     |   |   |           |           |           |
| 198 | 1 | 0 | 9.228981  | -2.245858 | -0.010160 |     |   |   |           |           |           |

  

**(2R,5S)-4a-OOH (included)**

| Center Number | Atomic Number | Atomic Type | Coordinates (Angstroms) |           |           |
|---------------|---------------|-------------|-------------------------|-----------|-----------|
|               |               |             | X                       | Y         | Z         |
| 1             | 6             | 0           | -0.745469               | 3.119921  | 2.550867  |
| 2             | 6             | 0           | -0.868084               | 4.533659  | 2.005193  |
| 3             | 6             | 0           | 0.369326                | 5.327302  | 2.435548  |
| 4             | 6             | 0           | 1.647568                | 4.620572  | 2.013841  |
| 5             | 6             | 0           | 1.677796                | 3.153293  | 2.434056  |
| 6             | 6             | 0           | 2.018683                | 2.923305  | 3.909817  |
| 7             | 6             | 0           | -5.607294               | 1.006858  | 2.310170  |
| 8             | 6             | 0           | -5.400945               | 2.218000  | 1.413932  |
| 9             | 6             | 0           | -3.911783               | 2.404130  | 1.185982  |
| 10            | 6             | 0           | -3.137630               | 2.442992  | 2.502281  |
| 11            | 6             | 0           | -3.498594               | 1.316836  | 3.463356  |
| 12            | 6             | 0           | -3.128799               | 1.606373  | 4.922940  |
| 13            | 6             | 0           | -5.509709               | -3.519932 | -0.646176 |
| 14            | 6             | 0           | -5.612465               | -2.173807 | -1.386363 |
| 15            | 6             | 0           | -4.981745               | -1.119240 | -0.490937 |
| 16            | 6             | 0           | -5.844870               | -0.890123 | 0.735409  |
| 17            | 6             | 0           | -6.257723               | -2.258058 | 1.322648  |
| 18            | 6             | 0           | -7.747451               | -2.526029 | 1.113227  |
| 19            | 6             | 0           | -0.881863               | -5.012495 | -0.965376 |
| 20            | 6             | 0           | -1.806002               | -5.067525 | -2.174458 |
| 21            | 6             | 0           | -3.057766               | -5.861475 | -1.816377 |
| 22            | 6             | 0           | -3.763495               | -5.291329 | -0.593389 |
| 23            | 6             | 0           | -2.825935               | -5.034450 | 0.577590  |
| 24            | 6             | 0           | -2.468664               | -6.256066 | 1.415429  |
| 25            | 6             | 0           | 3.637273                | -3.347935 | -3.264419 |
| 26            | 6             | 0           | 2.460879                | -3.746601 | -4.144624 |
| 27            | 6             | 0           | 1.183528                | -3.622624 | -3.322044 |
| 28            | 6             | 0           | 1.300143                | -4.462577 | -2.050690 |
| 29            | 6             | 0           | 2.565222                | -4.149763 | -1.266151 |
| 30            | 6             | 0           | 2.885974                | -5.172308 | -0.193513 |
| 31            | 6             | 0           | 5.191935                | 1.801405  | -2.727749 |
| 32            | 6             | 0           | 4.693156                | 1.252917  | -4.048823 |
| 33            | 6             | 0           | 3.723071                | 0.121399  | -3.813235 |
| 34            | 6             | 0           | 4.385856                | -0.978906 | -2.994778 |
| 35            | 6             | 0           | 4.815747                | -0.378916 | -1.652350 |
| 36            | 6             | 0           | 5.666588                | -1.264112 | -0.738709 |
| 37            | 6             | 0           | 2.456457                | 5.575792  | -0.095265 |
| 38            | 6             | 0           | 2.128233                | 5.457122  | -1.564850 |
| 39            | 6             | 0           | 2.522294                | 4.086436  | -2.061460 |
| 40            | 6             | 0           | 3.982461                | 3.776305  | -1.780028 |



|    |   |   |           |           |           |     |   |   |           |           |           |
|----|---|---|-----------|-----------|-----------|-----|---|---|-----------|-----------|-----------|
| 41 | 6 | 0 | 4.334861  | 4.025733  | -0.316904 | 97  | 6 | 0 | -3.656974 | 4.192742  | -2.802490 |
| 42 | 6 | 0 | 5.839783  | 4.135388  | -0.053000 | 98  | 6 | 0 | -5.194317 | 4.281435  | -2.707359 |
| 43 | 8 | 0 | -1.077945 | 4.562487  | 0.592313  | 99  | 6 | 0 | -5.735929 | 5.722432  | -2.801456 |
| 44 | 8 | 0 | 0.455427  | 5.360565  | 3.872711  | 100 | 6 | 0 | -5.586805 | 6.352726  | -4.199946 |
| 45 | 8 | 0 | 1.660161  | 4.609554  | 0.565568  | 101 | 6 | 0 | -6.187957 | 7.771198  | -4.258280 |
| 46 | 8 | 0 | 0.451770  | 2.505926  | 2.060957  | 102 | 8 | 0 | 6.127973  | -2.068867 | 4.424589  |
| 47 | 8 | 0 | -6.143602 | 2.034640  | 0.203902  | 103 | 8 | 0 | 7.146385  | -3.116714 | 4.293321  |
| 48 | 8 | 0 | -3.728900 | 3.639561  | 0.487855  | 104 | 1 | 0 | -0.755039 | 3.154099  | 3.617357  |
| 49 | 8 | 0 | -1.762096 | 2.267186  | 2.078494  | 105 | 1 | 0 | -1.739273 | 4.996518  | 2.449387  |
| 50 | 8 | 0 | -4.943120 | 1.187782  | 3.537638  | 106 | 1 | 0 | 0.333664  | 6.320726  | 2.006458  |
| 51 | 8 | 0 | -4.927142 | -2.185161 | -2.642487 | 107 | 1 | 0 | 2.514080  | 5.141840  | 2.393146  |
| 52 | 8 | 0 | -4.876582 | 0.111492  | -1.227676 | 108 | 1 | 0 | 2.433933  | 2.672290  | 1.835780  |
| 53 | 8 | 0 | -5.051366 | -0.158653 | 1.683083  | 109 | 1 | 0 | 1.182254  | 3.135022  | 4.548222  |
| 54 | 8 | 0 | -5.450287 | -3.318041 | 0.760070  | 110 | 1 | 0 | 2.832740  | 3.573705  | 4.199937  |
| 55 | 8 | 0 | -7.972746 | -3.915727 | 1.392655  | 111 | 1 | 0 | -6.654368 | 0.860541  | 2.529193  |
| 56 | 8 | 0 | -2.124369 | -3.719854 | -2.583696 | 112 | 1 | 0 | -5.794749 | 3.090141  | 1.911332  |
| 57 | 8 | 0 | -2.648261 | -7.195999 | -1.450472 | 113 | 1 | 0 | -3.541740 | 1.563565  | 0.622110  |
| 58 | 8 | 0 | -4.261440 | -4.021835 | -1.062313 | 114 | 1 | 0 | -3.296024 | 3.406165  | 2.966911  |
| 59 | 8 | 0 | -1.595087 | -4.399275 | 0.112591  | 115 | 1 | 0 | -3.064755 | 0.403606  | 3.091738  |
| 60 | 8 | 0 | -1.540828 | -5.850347 | 2.438950  | 116 | 1 | 0 | -3.262370 | 0.702330  | 5.505008  |
| 61 | 8 | 0 | 2.434024  | -2.993257 | -5.344154 | 117 | 1 | 0 | -3.835395 | 2.339912  | 5.277703  |
| 62 | 8 | 0 | 0.093663  | -4.101967 | -4.118834 | 118 | 1 | 0 | -6.306192 | -4.209877 | -0.878391 |
| 63 | 8 | 0 | 0.199679  | -4.124001 | -1.159530 | 119 | 1 | 0 | -6.637608 | -1.911001 | -1.595747 |
| 64 | 8 | 0 | 3.704785  | -4.219144 | -2.161648 | 120 | 1 | 0 | -4.007682 | -1.451189 | -0.166986 |
| 65 | 8 | 0 | 4.084126  | -4.816908 | 0.507580  | 121 | 1 | 0 | -6.707205 | -0.306339 | 0.449077  |
| 66 | 8 | 0 | 3.946202  | 2.257073  | -4.781061 | 122 | 1 | 0 | -6.024868 | -2.271432 | 2.371692  |
| 67 | 8 | 0 | 3.342458  | -0.428434 | -5.085403 | 123 | 1 | 0 | -8.047502 | -2.286623 | 0.098897  |
| 68 | 8 | 0 | 3.405889  | -2.001894 | -2.826695 | 124 | 1 | 0 | -8.300913 | -1.874604 | 1.781306  |
| 69 | 8 | 0 | 5.722623  | 0.728744  | -1.960162 | 125 | 1 | 0 | -0.546239 | -6.005111 | -0.710422 |
| 70 | 8 | 0 | 4.950349  | -2.326780 | -0.110348 | 126 | 1 | 0 | -1.296112 | -5.521101 | -3.005471 |
| 71 | 8 | 0 | 0.712842  | 5.633764  | -1.684520 | 127 | 1 | 0 | -3.750254 | -5.857919 | -2.645891 |
| 72 | 8 | 0 | 2.247161  | 4.100612  | -3.468138 | 128 | 1 | 0 | -4.575500 | -5.939154 | -0.292918 |
| 73 | 8 | 0 | 4.086560  | 2.356353  | -2.045294 | 129 | 1 | 0 | -3.285281 | -4.295823 | 1.209056  |
| 74 | 8 | 0 | 3.836772  | 5.317866  | 0.113456  | 130 | 1 | 0 | -2.069637 | -7.046407 | 0.801197  |
| 75 | 8 | 0 | 6.620014  | 3.195439  | -0.803836 | 131 | 1 | 0 | -3.353224 | -6.618272 | 1.916697  |
| 76 | 7 | 0 | 2.453884  | 1.543311  | 4.122360  | 132 | 1 | 0 | 4.571945  | -3.419455 | -3.797105 |
| 77 | 8 | 0 | -1.826618 | 2.171117  | 5.097862  | 133 | 1 | 0 | 2.588126  | -4.782420 | -4.420855 |
| 78 | 6 | 0 | 5.301817  | -2.228400 | 3.236719  | 134 | 1 | 0 | 1.048005  | -2.590666 | -3.035829 |
| 79 | 7 | 0 | 4.337237  | -1.149827 | 3.320012  | 135 | 1 | 0 | 1.264486  | -5.510463 | -2.325502 |
| 80 | 8 | 0 | 4.690589  | 0.094014  | 3.017419  | 136 | 1 | 0 | 2.494369  | -3.166882 | -0.838314 |
| 81 | 6 | 0 | 3.203064  | -3.023356 | 4.093461  | 137 | 1 | 0 | 3.003774  | -6.139211 | -0.667469 |
| 82 | 6 | 0 | 2.963287  | -1.549297 | 3.638965  | 138 | 1 | 0 | 2.071856  | -5.218184 | 0.514963  |
| 83 | 6 | 0 | 4.448373  | -3.485802 | 3.311232  | 139 | 1 | 0 | 5.985047  | 2.515015  | -2.835160 |
| 84 | 8 | 0 | 2.708334  | -1.786361 | 1.261343  | 140 | 1 | 0 | 5.523462  | 0.889232  | -4.637930 |
| 85 | 6 | 0 | 2.141506  | -1.598502 | 2.342461  | 141 | 1 | 0 | 2.861137  | 0.489552  | -3.278598 |
| 86 | 7 | 0 | 0.824138  | -1.548480 | 2.484404  | 142 | 1 | 0 | 5.253650  | -1.354649 | -3.523876 |
| 87 | 6 | 0 | -0.134533 | -1.873545 | 1.402762  | 143 | 1 | 0 | 3.946448  | -0.010751 | -1.129512 |
| 88 | 6 | 0 | 2.340878  | -0.769510 | 4.812024  | 144 | 1 | 0 | 6.110984  | -0.603711 | -0.003462 |
| 89 | 6 | 0 | 1.652039  | 0.558399  | 4.519673  | 145 | 1 | 0 | 6.464586  | -1.709857 | -1.312161 |
| 90 | 8 | 0 | 0.438382  | 0.659741  | 4.710415  | 146 | 1 | 0 | 2.273710  | 6.566950  | 0.285777  |
| 91 | 6 | 0 | -0.606651 | -0.642749 | 0.607880  | 147 | 1 | 0 | 2.675511  | 6.209687  | -2.116731 |
| 92 | 6 | 0 | 0.367401  | -0.251672 | -0.524121 | 148 | 1 | 0 | 1.925338  | 3.352156  | -1.548074 |
| 93 | 6 | 0 | 0.032380  | 1.120601  | -1.141323 | 149 | 1 | 0 | 4.619961  | 4.343900  | -2.444535 |
| 94 | 6 | 0 | -1.317807 | 1.164648  | -1.882467 | 150 | 1 | 0 | 3.875738  | 3.235345  | 0.254433  |
| 95 | 6 | 0 | -1.684256 | 2.597298  | -2.331730 | 151 | 1 | 0 | 6.027996  | 4.062104  | 1.010640  |
| 96 | 6 | 0 | -3.180024 | 2.731558  | -2.679892 | 152 | 1 | 0 | 6.148480  | 5.112023  | -0.386167 |

|     |   |   |           |           |           |
|-----|---|---|-----------|-----------|-----------|
| 153 | 1 | 0 | -0.252904 | 4.620770  | 0.081143  |
| 154 | 1 | 0 | -0.292051 | 5.819723  | 4.277460  |
| 155 | 1 | 0 | -5.632173 | 1.523341  | -0.449872 |
| 156 | 1 | 0 | -2.784316 | 3.845582  | 0.356164  |
| 157 | 1 | 0 | -4.199404 | -2.830556 | -2.616758 |
| 158 | 1 | 0 | -4.621273 | -0.090677 | -2.141547 |
| 159 | 1 | 0 | -8.917566 | -4.107162 | 1.453463  |
| 160 | 1 | 0 | -2.111603 | -3.154365 | -1.796632 |
| 161 | 1 | 0 | -2.492293 | -7.753647 | -2.223480 |
| 162 | 1 | 0 | -0.896673 | -5.248506 | 2.039894  |
| 163 | 1 | 0 | 2.647101  | -2.054746 | -5.188873 |
| 164 | 1 | 0 | -0.732108 | -3.665356 | -3.853864 |
| 165 | 1 | 0 | 4.598671  | -4.155967 | 0.008274  |
| 166 | 1 | 0 | 4.513753  | 2.830616  | -5.312733 |
| 167 | 1 | 0 | 2.947192  | 0.262642  | -5.635053 |
| 168 | 1 | 0 | 4.173251  | -2.033119 | 0.409470  |
| 169 | 1 | 0 | 0.429452  | 5.347334  | -2.565471 |
| 170 | 1 | 0 | 2.638940  | 3.327456  | -3.911133 |
| 171 | 1 | 0 | 6.441929  | 2.272823  | -0.571967 |
| 172 | 1 | 0 | 3.388649  | 1.298772  | 3.860662  |
| 173 | 1 | 0 | -1.102200 | 1.529387  | 4.984238  |
| 174 | 1 | 0 | 4.195057  | -3.832268 | 2.322731  |
| 175 | 1 | 0 | 4.987091  | -4.260593 | 3.832381  |
| 176 | 1 | 0 | 3.423691  | -3.013154 | 5.153269  |
| 177 | 1 | 0 | 2.330555  | -3.634383 | 3.914769  |
| 178 | 1 | 0 | 0.424252  | -1.189948 | 3.326411  |
| 179 | 1 | 0 | 0.313896  | -2.600111 | 0.748025  |
| 180 | 1 | 0 | 1.589044  | -1.388845 | 5.278312  |
| 181 | 1 | 0 | 3.133639  | -0.604354 | 5.530356  |
| 182 | 1 | 0 | -0.977951 | -2.346197 | 1.886529  |
| 183 | 1 | 0 | -0.749094 | 0.199611  | 1.270792  |
| 184 | 1 | 0 | -1.573444 | -0.887192 | 0.180419  |
| 185 | 1 | 0 | 1.372016  | -0.226121 | -0.123445 |
| 186 | 1 | 0 | 0.353829  | -1.025470 | -1.286718 |
| 187 | 1 | 0 | 0.023198  | 1.853047  | -0.342511 |
| 188 | 1 | 0 | 0.820193  | 1.398748  | -1.837714 |
| 189 | 1 | 0 | -2.100689 | 0.812700  | -1.221863 |
| 190 | 1 | 0 | -1.292309 | 0.496735  | -2.740837 |
| 191 | 1 | 0 | -1.062674 | 2.896960  | -3.172475 |
| 192 | 1 | 0 | -1.469553 | 3.268548  | -1.510417 |
| 193 | 1 | 0 | -3.402279 | 2.191439  | -3.597680 |
| 194 | 1 | 0 | -3.743644 | 2.271469  | -1.881784 |
| 195 | 1 | 0 | -3.296003 | 4.625241  | -3.730083 |
| 196 | 1 | 0 | -3.240547 | 4.762736  | -1.979687 |
| 197 | 1 | 0 | -5.646531 | 3.678339  | -3.492077 |
| 198 | 1 | 0 | -5.483048 | 3.855919  | -1.752205 |
| 199 | 1 | 0 | -5.224797 | 6.342268  | -2.069832 |
| 200 | 1 | 0 | -6.789786 | 5.720526  | -2.535544 |
| 201 | 1 | 0 | -6.083840 | 5.719262  | -4.929038 |
| 202 | 1 | 0 | -4.539019 | 6.398118  | -4.474088 |
| 203 | 1 | 0 | -7.244620 | 7.747353  | -4.012370 |
| 204 | 1 | 0 | -5.691505 | 8.423624  | -3.547280 |
| 205 | 1 | 0 | -6.079948 | 8.203698  | -5.247536 |
| 206 | 1 | 0 | 5.912161  | -2.150592 | 2.358260  |
| 207 | 1 | 0 | 7.919652  | -2.649406 | 4.648774  |

**(5R)-4b + borneol (top)**

| Center Number | Atomic Number | Atomic Type | Coordinates (Angstroms) |           |           |
|---------------|---------------|-------------|-------------------------|-----------|-----------|
|               |               |             | X                       | Y         | Z         |
| 1             | 6             | 0           | 3.756679                | -1.074052 | 0.747426  |
| 2             | 6             | 0           | 2.708181                | -0.669574 | 1.820503  |
| 3             | 6             | 0           | 3.257336                | 0.509034  | 2.626182  |
| 4             | 6             | 0           | 3.443505                | 1.708192  | 1.690634  |
| 5             | 6             | 0           | 4.022839                | 1.275050  | 0.336451  |
| 6             | 6             | 0           | 5.038008                | 2.258422  | -0.218414 |
| 7             | 6             | 0           | 1.094138                | -4.514560 | -1.861970 |
| 8             | 6             | 0           | 2.233918                | -4.947006 | -0.943141 |
| 9             | 6             | 0           | 2.679158                | -3.754703 | -0.125069 |
| 10            | 6             | 0           | 3.190746                | -2.667399 | -1.051187 |
| 11            | 6             | 0           | 2.380126                | -2.481468 | -2.347048 |
| 12            | 6             | 0           | 3.350497                | -2.110614 | -3.449547 |
| 13            | 6             | 0           | -2.800275               | -4.831252 | 1.789395  |
| 14            | 6             | 0           | -1.617846               | -3.960115 | 2.150639  |
| 15            | 6             | 0           | -0.969519               | -3.293481 | 0.945591  |
| 16            | 6             | 0           | -0.603152               | -4.379408 | -0.062491 |
| 17            | 6             | 0           | -1.899375               | -5.082610 | -0.477449 |
| 18            | 6             | 0           | -1.769522               | -6.293855 | -1.395511 |
| 19            | 6             | 0           | -6.810487               | -1.784205 | 1.524223  |
| 20            | 6             | 0           | -6.113095               | -2.519047 | 2.650260  |
| 21            | 6             | 0           | -6.049870               | -4.042466 | 2.475100  |
| 22            | 6             | 0           | -5.192375               | -4.669029 | 1.363698  |
| 23            | 6             | 0           | -5.664287               | -4.647244 | -0.087738 |
| 24            | 6             | 0           | -6.969672               | -5.398257 | -0.345968 |
| 25            | 6             | 0           | -6.904513               | 2.790870  | -0.481079 |
| 26            | 6             | 0           | -7.864742               | 2.909344  | 0.702384  |
| 27            | 6             | 0           | -7.522262               | 1.841186  | 1.735096  |
| 28            | 6             | 0           | -7.499406               | 0.488297  | 1.055619  |
| 29            | 6             | 0           | -6.498676               | 0.490410  | -0.083119 |
| 30            | 6             | 0           | -6.455712               | -0.886979 | -0.702988 |
| 31            | 6             | 0           | -2.767188               | 6.082715  | 0.418179  |
| 32            | 6             | 0           | -3.770402               | 5.883341  | 1.545339  |
| 33            | 6             | 0           | -4.393681               | 4.511394  | 1.417347  |
| 34            | 6             | 0           | -5.084371               | 4.376173  | 0.067758  |
| 35            | 6             | 0           | -4.054430               | 4.635119  | -1.032018 |
| 36            | 6             | 0           | -4.627239               | 4.746636  | -2.430742 |
| 37            | 6             | 0           | 1.868285                | 3.612469  | 1.711156  |
| 38            | 6             | 0           | 0.761253                | 3.717693  | 2.778815  |
| 39            | 6             | 0           | -0.576399               | 3.833633  | 2.069357  |
| 40            | 6             | 0           | -0.647462               | 5.164099  | 1.335142  |
| 41            | 6             | 0           | 0.660877                | 5.385834  | 0.548958  |
| 42            | 6             | 0           | 1.486861                | 6.522061  | 1.163136  |
| 43            | 8             | 0           | 1.436487                | -0.325287 | 1.243316  |
| 44            | 8             | 0           | 4.507555                | 0.163446  | 3.243066  |
| 45            | 8             | 0           | 2.133758                | 2.262256  | 1.427211  |
| 46            | 8             | 0           | 4.691655                | 0.000658  | 0.536775  |
| 47            | 8             | 0           | 1.902152                | -5.983732 | 0.008597  |
| 48            | 8             | 0           | 3.791527                | -4.131627 | 0.720797  |
| 49            | 8             | 0           | 3.096295                | -1.354447 | -0.463543 |
| 50            | 8             | 0           | 1.706844                | -3.675957 | -2.825460 |

|     |   |   |           |           |           |     |   |   |           |           |           |
|-----|---|---|-----------|-----------|-----------|-----|---|---|-----------|-----------|-----------|
| 51  | 8 | 0 | -2.067620 | -2.978610 | 3.083838  | 107 | 1 | 0 | -0.861209 | -4.598216 | 2.590120  |
| 52  | 8 | 0 | 0.179513  | -2.651418 | 1.521229  | 108 | 1 | 0 | -1.650776 | -2.581903 | 0.500050  |
| 53  | 8 | 0 | 0.081744  | -3.755149 | -1.178001 | 109 | 1 | 0 | 0.046650  | -5.094603 | 0.406673  |
| 54  | 8 | 0 | -2.438593 | -5.699333 | 0.724820  | 110 | 1 | 0 | -2.599814 | -4.363357 | -0.878470 |
| 55  | 8 | 0 | -1.309659 | -5.983825 | -2.723272 | 111 | 1 | 0 | -2.732064 | -6.786592 | -1.419802 |
| 56  | 8 | 0 | -4.861798 | -1.947936 | 2.979854  | 112 | 1 | 0 | -1.048795 | -6.977212 | -0.975649 |
| 57  | 8 | 0 | -7.384864 | -4.562129 | 2.285418  | 113 | 1 | 0 | -7.732670 | -2.279591 | 1.255047  |
| 58  | 8 | 0 | -3.891441 | -4.009646 | 1.437525  | 114 | 1 | 0 | -6.759689 | -2.357975 | 3.505559  |
| 59  | 8 | 0 | -5.956321 | -1.687487 | 0.403597  | 115 | 1 | 0 | -5.629586 | -4.409407 | 3.406497  |
| 60  | 8 | 0 | -6.976776 | -5.655197 | -1.771682 | 116 | 1 | 0 | -5.064311 | -5.708923 | 1.644237  |
| 61  | 8 | 0 | -7.798527 | 4.247811  | 1.202928  | 117 | 1 | 0 | -4.904975 | -5.169663 | -0.654895 |
| 62  | 8 | 0 | -8.502897 | 1.863018  | 2.775875  | 118 | 1 | 0 | -7.822882 | -4.811031 | -0.048313 |
| 63  | 8 | 0 | -7.123336 | -0.477773 | 2.046076  | 119 | 1 | 0 | -6.994538 | -6.328555 | 0.211195  |
| 64  | 8 | 0 | -6.924543 | 1.487968  | -1.032028 | 120 | 1 | 0 | -5.543543 | 3.414043  | -3.649607 |
| 65  | 8 | 0 | -5.622843 | -1.018694 | -1.789242 | 121 | 1 | 0 | -8.872861 | 2.740439  | 0.359003  |
| 66  | 8 | 0 | -3.098181 | 5.996857  | 2.822072  | 122 | 1 | 0 | -6.532116 | 2.026859  | 2.124393  |
| 67  | 8 | 0 | -5.343950 | 4.391183  | 2.512611  | 123 | 1 | 0 | -8.487757 | 0.268304  | 0.664528  |
| 68  | 8 | 0 | -5.571460 | 3.033020  | -0.002603 | 124 | 1 | 0 | -5.512623 | 0.720572  | 0.279650  |
| 69  | 8 | 0 | -3.486857 | 5.954363  | -0.793563 | 125 | 1 | 0 | -7.447896 | -1.228960 | -0.965385 |
| 70  | 8 | 0 | -5.083888 | 3.424675  | -2.801119 | 126 | 1 | 0 | -5.715130 | -3.636197 | -0.442483 |
| 71  | 8 | 0 | 0.782700  | 2.557809  | 3.608579  | 127 | 1 | 0 | -2.333409 | 7.070130  | 0.438053  |
| 72  | 8 | 0 | -1.621465 | 3.681253  | 3.046956  | 128 | 1 | 0 | -4.533714 | 6.643568  | 1.461107  |
| 73  | 8 | 0 | -1.780233 | 5.066856  | 0.439788  | 129 | 1 | 0 | -3.627266 | 3.761716  | 1.517404  |
| 74  | 8 | 0 | 1.408268  | 4.163600  | 0.480967  | 130 | 1 | 0 | -5.896682 | 5.083569  | 0.003110  |
| 75  | 8 | 0 | 2.816726  | 6.386736  | 0.650038  | 131 | 1 | 0 | -3.289057 | 3.878593  | -1.002391 |
| 76  | 7 | 0 | 5.399705  | 1.895161  | -1.582099 | 132 | 1 | 0 | -3.845937 | 5.090569  | -3.093032 |
| 77  | 8 | 0 | 2.686145  | -1.646179 | -4.647347 | 133 | 1 | 0 | -5.439734 | 5.460902  | -2.439687 |
| 78  | 6 | 0 | 5.950492  | 2.313828  | -3.913320 | 134 | 1 | 0 | 2.769718  | 4.117966  | 2.018916  |
| 79  | 6 | 0 | 4.306895  | 0.962372  | -4.858257 | 135 | 1 | 0 | 0.919371  | 4.605558  | 3.382157  |
| 80  | 6 | 0 | 3.969874  | 2.332536  | -5.377644 | 136 | 1 | 0 | -0.664134 | 3.042492  | 1.343655  |
| 81  | 6 | 0 | 9.121969  | 0.069717  | -1.572081 | 137 | 1 | 0 | -0.813851 | 5.965197  | 2.041967  |
| 82  | 6 | 0 | 8.307917  | -0.894378 | -0.694328 | 138 | 1 | 0 | 0.421868  | 5.616787  | -0.473640 |
| 83  | 6 | 0 | 9.156382  | -1.467690 | 0.458045  | 139 | 1 | 0 | 1.485884  | 6.462002  | 2.246566  |
| 84  | 6 | 0 | 8.375883  | -2.453359 | 1.356150  | 140 | 1 | 0 | 1.025593  | 7.465109  | 0.886763  |
| 85  | 6 | 0 | 7.256368  | -1.758046 | 2.153200  | 141 | 1 | 0 | 1.321835  | 0.639034  | 1.180184  |
| 86  | 6 | 0 | 6.380650  | -2.722681 | 2.983719  | 142 | 1 | 0 | 5.180925  | 0.058096  | 2.557461  |
| 87  | 6 | 0 | 7.082132  | -3.319850 | 4.221458  | 143 | 1 | 0 | 1.870583  | -6.853325 | -0.411411 |
| 88  | 6 | 0 | 7.433309  | -2.281367 | 5.310406  | 144 | 1 | 0 | 3.516727  | -4.880054 | 1.269088  |
| 89  | 6 | 0 | 6.200908  | -1.575030 | 5.912472  | 145 | 1 | 0 | -1.342404 | -2.355038 | 3.234359  |
| 90  | 6 | 0 | 6.585752  | -0.636248 | 7.072775  | 146 | 1 | 0 | 0.425197  | -1.767785 | 1.170771  |
| 91  | 6 | 0 | 5.364095  | 0.087775  | 7.669831  | 147 | 1 | 0 | -1.901764 | -5.358619 | -3.161852 |
| 92  | 1 | 0 | 4.337236  | -1.910430 | 1.081632  | 148 | 1 | 0 | -4.134135 | -2.382496 | 2.506798  |
| 93  | 1 | 0 | 2.541155  | -1.517623 | 2.465037  | 149 | 1 | 0 | -7.883824 | -4.562488 | 3.112282  |
| 94  | 1 | 0 | 2.567813  | 0.799386  | 3.398848  | 150 | 1 | 0 | -7.828304 | -6.018529 | -2.046265 |
| 95  | 1 | 0 | 4.068224  | 2.440101  | 2.186094  | 151 | 1 | 0 | -7.087911 | 4.344877  | 1.859280  |
| 96  | 1 | 0 | 3.210624  | 1.136878  | -0.356811 | 152 | 1 | 0 | -8.361874 | 1.086148  | 3.337164  |
| 97  | 1 | 0 | 5.910273  | 2.263228  | 0.425408  | 153 | 1 | 0 | -4.944637 | -0.298799 | -1.853253 |
| 98  | 1 | 0 | 4.612362  | 3.251741  | -0.243056 | 154 | 1 | 0 | -3.765424 | 6.014036  | 3.524376  |
| 99  | 1 | 0 | 0.637078  | -5.320187 | -2.399888 | 155 | 1 | 0 | -5.223937 | 3.557436  | 2.985994  |
| 100 | 1 | 0 | 3.045317  | -5.277308 | -1.579208 | 156 | 1 | 0 | -7.159842 | 3.477778  | -1.266005 |
| 101 | 1 | 0 | 1.859681  | -3.390360 | 0.464536  | 157 | 1 | 0 | -0.098733 | 2.466664  | 4.004038  |
| 102 | 1 | 0 | 4.223298  | -2.909253 | -1.270203 | 158 | 1 | 0 | -2.113793 | 4.513278  | 3.157290  |
| 103 | 1 | 0 | 1.655918  | -1.710484 | -2.161593 | 159 | 1 | 0 | 3.353014  | 7.168277  | 0.834898  |
| 104 | 1 | 0 | 3.943403  | -2.990091 | -3.673206 | 160 | 1 | 0 | 5.521515  | 0.926539  | -1.828766 |
| 105 | 1 | 0 | 4.012642  | -1.324209 | -3.141468 | 161 | 1 | 0 | 3.736658  | 0.066097  | -5.011679 |
| 106 | 1 | 0 | -3.064332 | -5.477373 | 2.611772  | 162 | 1 | 0 | 3.074423  | 2.687775  | -4.878524 |



|    |   |   |           |           |           |     |   |   |           |           |           |
|----|---|---|-----------|-----------|-----------|-----|---|---|-----------|-----------|-----------|
| 36 | 6 | 0 | -0.183326 | -5.101841 | -3.605422 | 92  | 6 | 0 | -4.106597 | 2.605176  | 6.475026  |
| 37 | 6 | 0 | -4.972500 | -3.156488 | 1.893804  | 93  | 6 | 0 | -4.705709 | -0.244664 | -5.208296 |
| 38 | 6 | 0 | -4.183209 | -4.011046 | 2.857698  | 94  | 6 | 0 | -5.787890 | 0.703630  | -4.678369 |
| 39 | 6 | 0 | -2.881206 | -4.385622 | 2.185174  | 95  | 7 | 0 | -5.377079 | 1.936519  | -4.357972 |
| 40 | 6 | 0 | -3.148475 | -5.088437 | 0.864070  | 96  | 8 | 0 | -6.950286 | 0.331153  | -4.623878 |
| 41 | 6 | 0 | -4.143792 | -4.344608 | -0.026892 | 97  | 6 | 0 | -4.070815 | -0.995779 | -2.871995 |
| 42 | 6 | 0 | -4.651681 | -5.227393 | -1.161180 | 98  | 8 | 0 | -4.409632 | -2.149365 | -2.617954 |
| 43 | 8 | 0 | -1.596814 | -0.600019 | 2.257537  | 99  | 6 | 0 | -2.774314 | -1.874501 | -4.878438 |
| 44 | 8 | 0 | -4.702089 | 0.880356  | 3.487005  | 100 | 7 | 0 | -2.470687 | 0.375543  | -4.163475 |
| 45 | 8 | 0 | -4.128777 | -2.097678 | 1.467784  | 101 | 8 | 0 | -2.741391 | 1.676965  | -3.674075 |
| 46 | 8 | 0 | -3.618380 | 1.366916  | 0.819044  | 102 | 1 | 0 | -2.817538 | 2.503697  | 2.267116  |
| 47 | 8 | 0 | 0.363291  | 6.186156  | 1.125549  | 103 | 1 | 0 | -2.089976 | 0.806169  | 3.711595  |
| 48 | 8 | 0 | -1.571660 | 4.414151  | 2.114588  | 104 | 1 | 0 | -3.831005 | -0.972917 | 3.708378  |
| 49 | 8 | 0 | -1.303712 | 1.681785  | 1.147249  | 105 | 1 | 0 | -5.510562 | -0.579381 | 1.726524  |
| 50 | 8 | 0 | 0.138337  | 3.682914  | -1.527478 | 106 | 1 | 0 | -2.903943 | -0.509901 | 0.243044  |
| 51 | 8 | 0 | 5.988316  | 5.908722  | 1.686683  | 107 | 1 | 0 | -5.548031 | 0.660154  | -0.608359 |
| 52 | 8 | 0 | 3.208575  | 6.303959  | 1.422734  | 108 | 1 | 0 | -5.265787 | -1.081250 | -0.704769 |
| 53 | 8 | 0 | 1.931375  | 4.425993  | -0.260784 | 109 | 1 | 0 | 0.833882  | 5.572601  | -1.583439 |
| 54 | 8 | 0 | 5.304962  | 4.760278  | -1.679852 | 110 | 1 | 0 | -1.164950 | 5.557010  | -0.160158 |
| 55 | 8 | 0 | 2.629702  | 2.959182  | -3.277163 | 111 | 1 | 0 | 0.336305  | 3.698038  | 1.676045  |
| 56 | 8 | 0 | 4.660822  | 1.599104  | 1.327273  | 112 | 1 | 0 | -2.010608 | 3.119316  | -0.163655 |
| 57 | 8 | 0 | 8.171808  | 0.667154  | 0.671497  | 113 | 1 | 0 | 0.917244  | 2.294960  | -0.190977 |
| 58 | 8 | 0 | 6.076410  | 3.560555  | 0.167380  | 114 | 1 | 0 | -1.248869 | 1.644547  | -2.198839 |
| 59 | 8 | 0 | 4.539309  | 0.443770  | -1.068561 | 115 | 1 | 0 | -0.481681 | 0.465641  | -1.116178 |
| 60 | 8 | 0 | 8.236425  | 1.353322  | -3.510134 | 116 | 1 | 0 | 7.016022  | 5.186888  | -0.686773 |
| 61 | 8 | 0 | 3.949079  | -5.901891 | -1.212298 | 117 | 1 | 0 | 5.223679  | 6.745115  | -0.063002 |
| 62 | 8 | 0 | 5.391738  | -4.113982 | 0.641800  | 118 | 1 | 0 | 3.917210  | 4.356971  | 1.222289  |
| 63 | 8 | 0 | 5.062497  | -1.393831 | 0.285977  | 119 | 1 | 0 | 2.991886  | 5.995850  | -1.128471 |
| 64 | 8 | 0 | 3.343477  | -2.598509 | -2.702371 | 120 | 1 | 0 | 4.060870  | 3.147870  | -1.179062 |
| 65 | 8 | 0 | 3.188474  | 0.357332  | -2.941023 | 121 | 1 | 0 | 4.390667  | 3.999675  | -3.654135 |
| 66 | 8 | 0 | -0.280925 | -6.788161 | 1.704219  | 122 | 1 | 0 | 2.967257  | 4.963513  | -3.318255 |
| 67 | 8 | 0 | 2.153259  | -5.831521 | 0.716816  | 123 | 1 | 0 | 6.435049  | -0.307158 | -0.750887 |
| 68 | 8 | 0 | 1.877660  | -3.943571 | -1.495479 | 124 | 1 | 0 | 5.903882  | 0.087315  | 1.822383  |
| 69 | 8 | 0 | -1.095183 | -6.124172 | -1.757032 | 125 | 1 | 0 | 7.192525  | 2.081635  | 1.868463  |
| 70 | 8 | 0 | 0.610286  | -4.001564 | -4.101911 | 126 | 1 | 0 | 8.113004  | 3.215789  | 0.054597  |
| 71 | 8 | 0 | -3.929470 | -3.256001 | 4.050311  | 127 | 1 | 0 | 7.052345  | 3.154431  | -2.222269 |
| 72 | 8 | 0 | -2.193872 | -5.241888 | 3.111738  | 128 | 1 | 0 | 8.597571  | 0.637731  | -1.572474 |
| 73 | 8 | 0 | -1.868135 | -5.127150 | 0.186241  | 129 | 1 | 0 | 9.301311  | 2.205101  | -1.915631 |
| 74 | 8 | 0 | -5.293417 | -3.963960 | 0.771534  | 130 | 1 | 0 | 0.810824  | -4.110175 | -5.040483 |
| 75 | 8 | 0 | -5.599267 | -4.581525 | -2.007053 | 131 | 1 | 0 | 5.107255  | -4.501007 | -2.101096 |
| 76 | 7 | 0 | -4.155019 | 0.028708  | -2.028927 | 132 | 1 | 0 | 3.453345  | -3.573691 | 0.248916  |
| 77 | 8 | 0 | 0.752875  | 1.242074  | -2.566706 | 133 | 1 | 0 | 5.630359  | -2.362935 | -1.441409 |
| 78 | 6 | 0 | -3.543207 | -0.661173 | -4.277020 | 134 | 1 | 0 | 2.750249  | -1.529994 | -1.007870 |
| 79 | 6 | 0 | -1.308325 | -0.030185 | -4.454551 | 135 | 1 | 0 | 4.961015  | -0.553497 | -2.846070 |
| 80 | 6 | 0 | -1.278567 | -1.444317 | -4.944937 | 136 | 1 | 0 | 6.309744  | 1.648616  | -1.820136 |
| 81 | 6 | 0 | -6.310091 | 2.927504  | -3.818370 | 137 | 1 | 0 | -2.048170 | -7.133124 | -0.289328 |
| 82 | 6 | 0 | -5.562838 | 3.887364  | -2.879376 | 138 | 1 | 0 | 0.390405  | -7.503668 | -0.134053 |
| 83 | 6 | 0 | -6.521873 | 4.850244  | -2.155973 | 139 | 1 | 0 | 0.496469  | -4.569877 | 0.553486  |
| 84 | 6 | 0 | -5.792980 | 5.916341  | -1.309654 | 140 | 1 | 0 | 1.664671  | -5.989135 | -1.840486 |
| 85 | 6 | 0 | -4.860444 | 5.311043  | -0.241384 | 141 | 1 | 0 | -0.685132 | -4.071142 | -1.776538 |
| 86 | 6 | 0 | -4.273359 | 6.362705  | 0.727235  | 142 | 1 | 0 | -1.194115 | -5.064795 | -3.987544 |
| 87 | 6 | 0 | -5.275836 | 6.879337  | 1.785328  | 143 | 1 | 0 | 0.251656  | -6.057290 | -3.868930 |
| 88 | 6 | 0 | -5.679831 | 5.823636  | 2.838773  | 144 | 1 | 0 | -5.895591 | -2.793413 | 2.315514  |
| 89 | 6 | 0 | -4.521552 | 5.415907  | 3.770134  | 145 | 1 | 0 | -4.749513 | -4.905594 | 3.076717  |
| 90 | 6 | 0 | -4.915408 | 4.286813  | 4.740722  | 146 | 1 | 0 | -2.325983 | -3.481694 | 1.994774  |
| 91 | 6 | 0 | -3.748704 | 3.858239  | 5.652063  | 147 | 1 | 0 | -3.493279 | -6.095309 | 1.069480  |

|     |   |   |           |           |           |     |   |   |           |           |           |
|-----|---|---|-----------|-----------|-----------|-----|---|---|-----------|-----------|-----------|
| 148 | 1 | 0 | -3.669611 | -3.462697 | -0.418016 | 204 | 1 | 0 | -0.904682 | -1.461211 | -5.962844 |
| 149 | 1 | 0 | -5.156482 | -6.080626 | -0.731554 | 205 | 6 | 0 | 3.978512  | -2.203196 | 3.627966  |
| 150 | 1 | 0 | -3.784841 | -5.575033 | -1.716589 | 206 | 6 | 0 | 2.872863  | -1.148179 | 3.916614  |
| 151 | 1 | 0 | -0.892791 | -0.160599 | 1.758593  | 207 | 6 | 0 | 1.722880  | -3.111355 | 3.808598  |
| 152 | 1 | 0 | -4.956247 | 1.466791  | 2.761186  | 208 | 6 | 0 | 3.192338  | -3.551066 | 3.643093  |
| 153 | 1 | 0 | 0.165588  | 7.087636  | 0.839365  | 209 | 6 | 0 | 1.874626  | -1.930957 | 4.819036  |
| 154 | 1 | 0 | -1.213936 | 5.112217  | 2.681092  | 210 | 6 | 0 | 2.088462  | -0.998699 | 2.594092  |
| 155 | 1 | 0 | 5.415109  | 6.365607  | 2.319732  | 211 | 6 | 0 | 1.334657  | -2.369420 | 2.499307  |
| 156 | 1 | 0 | 2.253993  | 6.118374  | 1.484859  | 212 | 6 | 0 | 0.554202  | -1.184878 | 5.087094  |
| 157 | 1 | 0 | 3.110843  | 2.108257  | -3.300045 | 213 | 6 | 0 | 2.467733  | -2.310172 | 6.190375  |
| 158 | 1 | 0 | 4.761792  | 2.436997  | 0.857295  | 214 | 6 | 0 | 0.797661  | -4.265916 | 4.168370  |
| 159 | 1 | 0 | 8.487614  | 0.260696  | 1.488401  | 215 | 8 | 0 | 3.344552  | -4.343522 | 2.440910  |
| 160 | 1 | 0 | 9.011724  | 0.939400  | -3.910610 | 216 | 1 | 0 | 4.425144  | -2.030346 | 2.659253  |
| 161 | 1 | 0 | 3.383362  | -6.001927 | -0.414622 | 217 | 1 | 0 | 4.756890  | -2.196862 | 4.380423  |
| 162 | 1 | 0 | 5.945911  | -3.367441 | 0.912551  | 218 | 1 | 0 | 3.492152  | -4.168515 | 4.477907  |
| 163 | 1 | 0 | 2.259857  | 0.396396  | -2.607145 | 219 | 1 | 0 | 1.390847  | -0.172536 | 2.643763  |
| 164 | 1 | 0 | 0.546159  | -7.030303 | 2.142778  | 220 | 1 | 0 | 2.760127  | -0.821352 | 1.765396  |
| 165 | 1 | 0 | 2.462775  | -5.243190 | 1.456386  | 221 | 1 | 0 | 0.265672  | -2.223971 | 2.448382  |
| 166 | 1 | 0 | 2.881405  | -4.482274 | -3.225145 | 222 | 1 | 0 | 1.640796  | -2.937274 | 1.637644  |
| 167 | 1 | 0 | -3.214508 | -3.692686 | 4.536105  | 223 | 1 | 0 | 3.244467  | -0.219261 | 4.324100  |
| 168 | 1 | 0 | -1.471206 | -5.729291 | 2.673707  | 224 | 1 | 0 | -0.068391 | -1.772619 | 5.754341  |
| 169 | 1 | 0 | -5.280471 | -3.706497 | -2.278775 | 225 | 1 | 0 | 0.764417  | -0.240334 | 5.580880  |
| 170 | 1 | 0 | -3.781589 | 0.912861  | -2.337160 | 226 | 1 | 0 | -0.018787 | -0.988794 | 4.194336  |
| 171 | 1 | 0 | -0.457839 | 0.594561  | -4.287098 | 227 | 1 | 0 | 2.573937  | -1.413918 | 6.793507  |
| 172 | 1 | 0 | -0.625917 | -2.068304 | -4.348306 | 228 | 1 | 0 | 1.800131  | -2.984192 | 6.716298  |
| 173 | 1 | 0 | 1.119507  | 2.120871  | -2.819615 | 229 | 1 | 0 | 3.439538  | -2.778972 | 6.126831  |
| 174 | 1 | 0 | -6.779319 | 3.484600  | -4.622286 | 230 | 1 | 0 | 0.865849  | -5.037644 | 3.410903  |
| 175 | 1 | 0 | -7.091517 | 2.403163  | -3.284902 | 231 | 1 | 0 | 1.074333  | -4.706604 | 5.121070  |
| 176 | 1 | 0 | -4.834346 | 4.455458  | -3.450917 | 232 | 1 | 0 | -0.239097 | -3.962455 | 4.209964  |
| 177 | 1 | 0 | -5.018605 | 3.295627  | -2.153962 | 233 | 1 | 0 | 4.247436  | -4.365703 | 2.071493  |
| 178 | 1 | 0 | -7.147021 | 5.351016  | -2.890055 |     |   |   |           |           |           |
| 179 | 1 | 0 | -7.181462 | 4.275133  | -1.512148 |     |   |   |           |           |           |
| 180 | 1 | 0 | -5.208622 | 6.556054  | -1.965852 |     |   |   |           |           |           |
| 181 | 1 | 0 | -6.537185 | 6.543492  | -0.830798 |     |   |   |           |           |           |
| 182 | 1 | 0 | -5.392792 | 4.549969  | 0.318140  |     |   |   |           |           |           |
| 183 | 1 | 0 | -4.039138 | 4.807978  | -0.740510 |     |   |   |           |           |           |
| 184 | 1 | 0 | -3.916242 | 7.208032  | 0.142131  |     |   |   |           |           |           |
| 185 | 1 | 0 | -3.415227 | 5.929782  | 1.224601  |     |   |   |           |           |           |
| 186 | 1 | 0 | -4.835897 | 7.728792  | 2.301628  |     |   |   |           |           |           |
| 187 | 1 | 0 | -6.167233 | 7.245408  | 1.286781  |     |   |   |           |           |           |
| 188 | 1 | 0 | -6.489083 | 6.224019  | 3.442955  |     |   |   |           |           |           |
| 189 | 1 | 0 | -6.068376 | 4.940237  | 2.343498  |     |   |   |           |           |           |
| 190 | 1 | 0 | -4.198408 | 6.286005  | 4.337178  |     |   |   |           |           |           |
| 191 | 1 | 0 | -3.679759 | 5.075413  | 3.181941  |     |   |   |           |           |           |
| 192 | 1 | 0 | -5.233662 | 3.420465  | 4.170802  |     |   |   |           |           |           |
| 193 | 1 | 0 | -5.757117 | 4.598502  | 5.352783  |     |   |   |           |           |           |
| 194 | 1 | 0 | -2.881216 | 3.643893  | 5.033180  |     |   |   |           |           |           |
| 195 | 1 | 0 | -3.480720 | 4.679010  | 6.311092  |     |   |   |           |           |           |
| 196 | 1 | 0 | -4.350357 | 1.791582  | 5.803462  |     |   |   |           |           |           |
| 197 | 1 | 0 | -3.279638 | 2.303228  | 7.109526  |     |   |   |           |           |           |
| 198 | 1 | 0 | -4.964899 | 2.799214  | 7.110408  |     |   |   |           |           |           |
| 199 | 1 | 0 | -4.272901 | 0.180507  | -6.106742 |     |   |   |           |           |           |
| 200 | 1 | 0 | -5.234186 | -1.150476 | -5.464853 |     |   |   |           |           |           |
| 201 | 1 | 0 | -4.386978 | 2.109721  | -4.296649 |     |   |   |           |           |           |
| 202 | 1 | 0 | -2.930029 | -2.736236 | -4.252382 |     |   |   |           |           |           |
| 203 | 1 | 0 | -3.148795 | -2.091392 | -5.867302 |     |   |   |           |           |           |

**(5R)-4a + borneol (top)**

| Center Number | Atomic Number | Atomic Type | Coordinates (Angstroms) |           |           |
|---------------|---------------|-------------|-------------------------|-----------|-----------|
|               |               |             | X                       | Y         | Z         |
| 1             | 6             | 0           | 0.896036                | 3.013229  | -0.823364 |
| 2             | 6             | 0           | 1.215322                | 2.319899  | -2.129066 |
| 3             | 6             | 0           | 2.724963                | 2.475970  | -2.369207 |
| 4             | 6             | 0           | 3.542250                | 1.933837  | -1.196265 |
| 5             | 6             | 0           | 3.059336                | 2.432276  | 0.162015  |
| 6             | 6             | 0           | 3.526641                | 3.852273  | 0.525092  |
| 7             | 6             | 0           | -3.022845               | 4.681863  | 2.259879  |
| 8             | 6             | 0           | -1.948432               | 5.570583  | 1.657439  |
| 9             | 6             | 0           | -1.383100               | 4.948909  | 0.391983  |
| 10            | 6             | 0           | -0.877863               | 3.556967  | 0.688536  |
| 11            | 6             | 0           | -2.001083               | 2.706728  | 1.255320  |
| 12            | 6             | 0           | -1.511206               | 1.342670  | 1.675486  |
| 13            | 6             | 0           | -7.583146               | 2.530653  | 1.011636  |
| 14            | 6             | 0           | -7.680930               | 4.009279  | 0.715089  |
| 15            | 6             | 0           | -6.268881               | 4.506190  | 0.503762  |
| 16            | 6             | 0           | -5.438619               | 4.318552  | 1.762434  |
| 17            | 6             | 0           | -5.505572               | 2.873726  | 2.296922  |
| 18            | 6             | 0           | -5.188741               | 2.762318  | 3.781434  |
| 19            | 6             | 0           | -5.680769               | -0.393464 | -2.588858 |
| 20            | 6             | 0           | -7.123048               | 0.060756  | -2.515996 |

|    |   |   |           |           |           |     |   |   |           |           |           |
|----|---|---|-----------|-----------|-----------|-----|---|---|-----------|-----------|-----------|
| 21 | 6 | 0 | -7.655076 | -0.106045 | -1.103717 | 77  | 8 | 0 | -2.656924 | 0.485896  | 1.891428  |
| 22 | 6 | 0 | -6.748257 | 0.483987  | -0.027036 | 78  | 6 | 0 | 8.324130  | 4.572206  | -3.144735 |
| 23 | 6 | 0 | -5.277978 | 0.123001  | -0.235585 | 79  | 6 | 0 | 7.798766  | 3.500310  | -1.006081 |
| 24 | 6 | 0 | -4.908431 | -1.265779 | 0.279890  | 80  | 6 | 0 | 9.522042  | 4.430192  | -2.240385 |
| 25 | 6 | 0 | -1.906747 | -2.494691 | -4.757534 | 81  | 8 | 0 | 6.641786  | 1.519959  | -1.658162 |
| 26 | 6 | 0 | -1.616322 | -1.093289 | -4.225604 | 82  | 6 | 0 | 7.688836  | 1.975411  | -1.171961 |
| 27 | 6 | 0 | -2.818823 | -0.562903 | -3.463307 | 83  | 7 | 0 | 8.721562  | 1.293408  | -0.736772 |
| 28 | 6 | 0 | -4.032860 | -0.616056 | -4.386736 | 84  | 6 | 0 | 8.809583  | -0.178035 | -0.714252 |
| 29 | 6 | 0 | -4.277679 | -2.063767 | -4.797868 | 85  | 6 | 0 | 9.131109  | -0.662184 | 0.709518  |
| 30 | 6 | 0 | -5.465875 | -2.266505 | -5.712146 | 86  | 6 | 0 | 7.994680  | -0.366713 | 1.703994  |
| 31 | 6 | 0 | 1.352613  | -4.756831 | -1.813919 | 87  | 6 | 0 | 8.377554  | -0.733415 | 3.151948  |
| 32 | 6 | 0 | 1.212492  | -5.165738 | -3.262700 | 88  | 6 | 0 | 7.407782  | -0.146391 | 4.201920  |
| 33 | 6 | 0 | 0.198229  | -4.249640 | -3.934639 | 89  | 6 | 0 | 5.922491  | -0.496849 | 3.977347  |
| 34 | 6 | 0 | -1.142383 | -4.336818 | -3.220820 | 90  | 6 | 0 | 5.631471  | -2.008735 | 4.021264  |
| 35 | 6 | 0 | -0.937255 | -4.004223 | -1.740003 | 91  | 6 | 0 | 4.139869  | -2.309435 | 3.775866  |
| 36 | 6 | 0 | -2.155760 | -4.248364 | -0.878895 | 92  | 6 | 0 | 3.774290  | -3.802059 | 3.930356  |
| 37 | 6 | 0 | 4.079510  | -0.355583 | -0.355133 | 93  | 6 | 0 | 4.417171  | -4.708610 | 2.861444  |
| 38 | 6 | 0 | 4.813157  | -1.445198 | -1.130361 | 94  | 6 | 0 | 4.002672  | -6.191001 | 2.986814  |
| 39 | 6 | 0 | 3.790449  | -2.219069 | -1.927059 | 95  | 6 | 0 | 2.525071  | -6.445338 | 2.626990  |
| 40 | 6 | 0 | 2.779111  | -2.860157 | -1.010330 | 96  | 6 | 0 | 7.343702  | 3.886339  | 0.411759  |
| 41 | 6 | 0 | 2.112125  | -1.807644 | -0.137746 | 97  | 6 | 0 | 5.951957  | 3.357992  | 0.723157  |
| 42 | 6 | 0 | 1.277493  | -2.385577 | 0.990299  | 98  | 8 | 0 | 5.775673  | 2.307804  | 1.329992  |
| 43 | 8 | 0 | 0.887973  | 0.928901  | -2.114861 | 99  | 6 | 0 | 7.142016  | 4.261701  | -2.177247 |
| 44 | 8 | 0 | 3.087962  | 3.874194  | -2.439004 | 100 | 7 | 0 | 9.235644  | 3.880664  | -1.139675 |
| 45 | 8 | 0 | 3.384447  | 0.483239  | -1.281959 | 101 | 8 | 0 | 10.119746 | 3.528371  | -0.115128 |
| 46 | 8 | 0 | 1.620649  | 2.383886  | 0.248850  | 102 | 1 | 0 | 1.167096  | 4.048612  | -0.892210 |
| 47 | 8 | 0 | -2.467017 | 6.875558  | 1.350104  | 103 | 1 | 0 | 0.642040  | 2.782097  | -2.918123 |
| 48 | 8 | 0 | -0.274366 | 5.749938  | -0.063667 | 104 | 1 | 0 | 3.012734  | 1.939504  | -3.262433 |
| 49 | 8 | 0 | -0.469439 | 2.898859  | -0.526444 | 105 | 1 | 0 | 4.575789  | 2.167700  | -1.346983 |
| 50 | 8 | 0 | -2.513677 | 3.374195  | 2.445098  | 106 | 1 | 0 | 3.407316  | 1.760829  | 0.923148  |
| 51 | 8 | 0 | -8.485646 | 4.214655  | -0.438692 | 107 | 1 | 0 | 3.310758  | 4.004390  | 1.574641  |
| 52 | 8 | 0 | -6.390129 | 5.904826  | 0.167601  | 108 | 1 | 0 | 2.976058  | 4.572461  | -0.050141 |
| 53 | 8 | 0 | -4.100964 | 4.708131  | 1.336683  | 109 | 1 | 0 | -3.338216 | 5.034479  | 3.228360  |
| 54 | 8 | 0 | -6.888698 | 2.403442  | 2.253839  | 110 | 1 | 0 | -1.149820 | 5.701584  | 2.370325  |
| 55 | 8 | 0 | -6.036876 | 3.661464  | 4.520624  | 111 | 1 | 0 | -2.156441 | 4.891353  | -0.361826 |
| 56 | 8 | 0 | -7.225311 | 1.436029  | -2.875688 | 112 | 1 | 0 | -0.052942 | 3.603949  | 1.382256  |
| 57 | 8 | 0 | -7.673142 | -1.540604 | -0.895131 | 113 | 1 | 0 | -2.780972 | 2.611396  | 0.517731  |
| 58 | 8 | 0 | -6.854184 | 1.923594  | -0.031468 | 114 | 1 | 0 | -0.949991 | 1.448798  | 2.593916  |
| 59 | 8 | 0 | -4.886505 | 0.299491  | -1.610925 | 115 | 1 | 0 | -0.870050 | 0.941569  | 0.907566  |
| 60 | 8 | 0 | -3.476002 | -1.423156 | 0.219441  | 116 | 1 | 0 | -8.549955 | 2.075883  | 1.153896  |
| 61 | 8 | 0 | -0.464856 | -1.172569 | -3.386638 | 117 | 1 | 0 | -8.105349 | 4.497227  | 1.584201  |
| 62 | 8 | 0 | -2.524686 | 0.792963  | -3.103829 | 118 | 1 | 0 | -5.827902 | 3.950650  | -0.306832 |
| 63 | 8 | 0 | -5.204520 | 0.021066  | -3.842860 | 119 | 1 | 0 | -5.780917 | 4.990005  | 2.535653  |
| 64 | 8 | 0 | -3.099212 | -2.448966 | -5.541723 | 120 | 1 | 0 | -4.863655 | 2.231160  | 1.728518  |
| 65 | 8 | 0 | -6.627032 | -2.291475 | -4.848539 | 121 | 1 | 0 | -4.169292 | 3.023752  | 3.982410  |
| 66 | 8 | 0 | 2.455205  | -5.080436 | -3.972026 | 122 | 1 | 0 | -5.353006 | 1.734642  | 4.078495  |
| 67 | 8 | 0 | 0.044731  | -4.679199 | -5.303499 | 123 | 1 | 0 | -5.615881 | -1.455594 | -2.451767 |
| 68 | 8 | 0 | -2.124317 | -3.369397 | -3.657422 | 124 | 1 | 0 | -7.682845 | -0.576286 | -3.182379 |
| 69 | 8 | 0 | 0.109852  | -4.843383 | -1.167486 | 125 | 1 | 0 | -8.639752 | 0.336195  | -1.043102 |
| 70 | 8 | 0 | -1.972681 | -3.635846 | 0.413232  | 126 | 1 | 0 | -7.057881 | 0.109207  | 0.941202  |
| 71 | 8 | 0 | 5.794267  | -0.989088 | -2.063446 | 127 | 1 | 0 | -4.685895 | 0.830632  | 0.313536  |
| 72 | 8 | 0 | 4.416197  | -3.279993 | -2.670966 | 128 | 1 | 0 | -5.356193 | -2.046104 | -0.305134 |
| 73 | 8 | 0 | 1.793693  | -3.407570 | -1.876305 | 129 | 1 | 0 | -5.256731 | -1.360144 | 1.300537  |
| 74 | 8 | 0 | 3.142366  | -0.992593 | 0.513181  | 130 | 1 | 0 | -1.138763 | -2.865635 | -5.404373 |
| 75 | 8 | 0 | 0.780874  | -1.288378 | 1.797963  | 131 | 1 | 0 | -1.443731 | -0.440162 | -5.073566 |
| 76 | 7 | 0 | 4.943221  | 4.115768  | 0.260721  | 132 | 1 | 0 | -2.969445 | -1.165165 | -2.580049 |

|     |   |   |           |           |           |     |   |   |           |           |           |
|-----|---|---|-----------|-----------|-----------|-----|---|---|-----------|-----------|-----------|
| 133 | 1 | 0 | -3.812964 | -0.045915 | -5.276792 | 189 | 1 | 0 | 3.867651  | -1.965125 | 2.783303  |
| 134 | 1 | 0 | -4.391329 | -2.711662 | -3.945245 | 190 | 1 | 0 | 4.080619  | -4.145124 | 4.915016  |
| 135 | 1 | 0 | -5.335624 | -3.210492 | -6.224259 | 191 | 1 | 0 | 2.695268  | -3.899144 | 3.880855  |
| 136 | 1 | 0 | -5.528553 | -1.471127 | -6.444291 | 192 | 1 | 0 | 4.145633  | -4.347039 | 1.872788  |
| 137 | 1 | 0 | 2.053740  | -5.372184 | -1.271400 | 193 | 1 | 0 | 5.496717  | -4.642023 | 2.939094  |
| 138 | 1 | 0 | 0.868611  | -6.187038 | -3.321240 | 194 | 1 | 0 | 4.628991  | -6.786311 | 2.329445  |
| 139 | 1 | 0 | 0.551235  | -3.233388 | -3.882357 | 195 | 1 | 0 | 4.194485  | -6.529430 | 4.000767  |
| 140 | 1 | 0 | -1.553532 | -5.326877 | -3.361287 | 196 | 1 | 0 | 1.854933  | -5.928467 | 3.302390  |
| 141 | 1 | 0 | -0.648537 | -2.969291 | -1.702112 | 197 | 1 | 0 | 2.312321  | -6.107104 | 1.618021  |
| 142 | 1 | 0 | -2.277472 | -5.312744 | -0.744447 | 198 | 1 | 0 | 2.295410  | -7.503986 | 2.678556  |
| 143 | 1 | 0 | -3.022640 | -3.841725 | -1.378867 | 199 | 1 | 0 | 8.050317  | 3.455256  | 1.100715  |
| 144 | 1 | 0 | 4.745027  | 0.226417  | 0.259043  | 200 | 1 | 0 | 7.376359  | 4.963698  | 0.504781  |
| 145 | 1 | 0 | 5.275364  | -2.095971 | -0.399784 | 201 | 1 | 0 | 5.195953  | -2.920104 | -3.119980 |
| 146 | 1 | 0 | 3.281655  | -1.541247 | -2.593924 | 202 | 1 | 0 | 6.738537  | 5.198298  | -1.819331 |
| 147 | 1 | 0 | 3.260506  | -3.626153 | -0.414502 | 203 | 1 | 0 | 6.356166  | 3.682339  | -2.629106 |
| 148 | 1 | 0 | 1.488943  | -1.185598 | -0.752988 | 204 | 1 | 0 | 8.255462  | 5.560187  | -3.576954 |
| 149 | 1 | 0 | 1.886702  | -3.041007 | 1.595714  | 205 | 6 | 0 | -1.523905 | -2.360934 | 4.226126  |
| 150 | 1 | 0 | 0.418124  | -2.918384 | 0.619718  | 206 | 6 | 0 | -2.937055 | -2.475707 | 4.834861  |
| 151 | 1 | 0 | 1.620370  | 0.447247  | -1.705080 | 207 | 6 | 0 | -2.418579 | -4.628524 | 4.306530  |
| 152 | 1 | 0 | 2.682107  | 4.300691  | -3.205689 | 208 | 6 | 0 | -1.201767 | -3.820134 | 3.774541  |
| 153 | 1 | 0 | -3.374619 | 6.762400  | 1.033312  | 209 | 1 | 0 | -0.827568 | -2.024911 | 4.984050  |
| 154 | 1 | 0 | -0.558075 | 6.676240  | -0.084480 | 210 | 1 | 0 | -1.156206 | -3.872867 | 2.696153  |
| 155 | 1 | 0 | -8.269854 | 5.081759  | -0.810204 | 211 | 1 | 0 | -0.264046 | -4.165283 | 4.192646  |
| 156 | 1 | 0 | -5.576852 | 6.214656  | -0.248038 | 212 | 6 | 0 | -2.829442 | -3.841757 | 5.584745  |
| 157 | 1 | 0 | -6.954011 | 3.404909  | 4.349255  | 213 | 6 | 0 | -3.888592 | -2.818649 | 3.656064  |
| 158 | 1 | 0 | -6.530650 | 1.625544  | -3.522692 | 214 | 1 | 0 | -4.922496 | -2.681938 | 3.949524  |
| 159 | 1 | 0 | -8.352560 | -1.810121 | -0.264854 | 215 | 1 | 0 | -3.684707 | -2.186526 | 2.809266  |
| 160 | 1 | 0 | -3.055048 | -0.678418 | 0.707237  | 216 | 6 | 0 | -3.573495 | -4.316502 | 3.326041  |
| 161 | 1 | 0 | -0.247493 | -0.307292 | -2.987276 | 217 | 1 | 0 | -4.431875 | -4.952594 | 3.500951  |
| 162 | 1 | 0 | -3.191956 | 1.061358  | -2.452372 | 218 | 1 | 0 | -3.251798 | -4.429690 | 2.302209  |
| 163 | 1 | 0 | -7.434686 | -2.429377 | -5.358392 | 219 | 1 | 0 | -2.222738 | -5.681559 | 4.452446  |
| 164 | 1 | 0 | 3.035485  | -4.394425 | -3.591420 | 220 | 6 | 0 | -1.767518 | -3.895776 | 6.700975  |
| 165 | 1 | 0 | 0.934126  | -4.842453 | -5.654332 | 221 | 1 | 0 | -0.771596 | -3.658101 | 6.356891  |
| 166 | 1 | 0 | -2.495512 | -2.805789 | 0.442866  | 222 | 1 | 0 | -2.024022 | -3.209135 | 7.501382  |
| 167 | 1 | 0 | 6.031884  | -0.043604 | -1.979490 | 223 | 1 | 0 | -1.739754 | -4.896763 | 7.120427  |
| 168 | 1 | 0 | 1.503741  | -0.669179 | 1.971478  | 224 | 6 | 0 | -4.156652 | -4.311742 | 6.205534  |
| 169 | 1 | 0 | 5.146480  | 4.935439  | -0.264588 | 225 | 1 | 0 | -4.062200 | -5.343540 | 6.530453  |
| 170 | 1 | 0 | -2.394820 | -0.226075 | 2.535359  | 226 | 1 | 0 | -4.395000 | -3.710314 | 7.077205  |
| 171 | 1 | 0 | 8.386724  | 3.847889  | -3.949676 | 227 | 1 | 0 | -4.987195 | -4.251137 | 5.518645  |
| 172 | 1 | 0 | 10.529015 | 4.706316  | -2.461663 | 228 | 6 | 0 | -3.353078 | -1.242417 | 5.627490  |
| 173 | 1 | 0 | 9.492177  | 1.837694  | -0.358938 | 229 | 1 | 0 | -3.351667 | -0.372017 | 4.979530  |
| 174 | 1 | 0 | 7.876756  | -0.584339 | -1.068169 | 230 | 1 | 0 | -4.351102 | -1.359666 | 6.036032  |
| 175 | 1 | 0 | 9.594914  | -0.481470 | -1.396503 | 231 | 1 | 0 | -2.667112 | -1.051525 | 6.446668  |
| 176 | 1 | 0 | 9.321775  | -1.730349 | 0.673930  | 232 | 8 | 0 | -1.508622 | -1.402491 | 3.151838  |
| 177 | 1 | 0 | 10.045840 | -0.182304 | 1.044929  | 233 | 1 | 0 | -0.658732 | -1.410320 | 2.654468  |
| 178 | 1 | 0 | 7.119093  | -0.935518 | 1.407067  |     |   |   |           |           |           |
| 179 | 1 | 0 | 7.716839  | 0.677538  | 1.656053  |     |   |   |           |           |           |
| 180 | 1 | 0 | 8.431940  | -1.812303 | 3.251619  |     |   |   |           |           |           |
| 181 | 1 | 0 | 9.372130  | -0.348359 | 3.360935  |     |   |   |           |           |           |
| 182 | 1 | 0 | 7.708636  | -0.489077 | 5.188135  |     |   |   |           |           |           |
| 183 | 1 | 0 | 7.509410  | 0.934942  | 4.192309  |     |   |   |           |           |           |
| 184 | 1 | 0 | 5.335577  | -0.009678 | 4.751416  |     |   |   |           |           |           |
| 185 | 1 | 0 | 5.593709  | -0.081199 | 3.031428  |     |   |   |           |           |           |
| 186 | 1 | 0 | 6.229561  | -2.515669 | 3.273845  |     |   |   |           |           |           |
| 187 | 1 | 0 | 5.924711  | -2.401602 | 4.991563  |     |   |   |           |           |           |
| 188 | 1 | 0 | 3.551887  | -1.735440 | 4.487707  |     |   |   |           |           |           |

**(5R)-4a + borneol (bottom)**

| Center Number | Atomic Number | Atomic Type | Coordinates (Angstroms) |          |          |
|---------------|---------------|-------------|-------------------------|----------|----------|
|               |               |             | X                       | Y        | Z        |
| 1             | 6             | 0           | -2.613552               | 5.200072 | 1.360632 |
| 2             | 6             | 0           | -2.354846               | 5.429785 | 2.861801 |
| 3             | 6             | 0           | -3.197247               | 4.449004 | 3.693299 |
| 4             | 6             | 0           | -3.200282               | 3.052486 | 3.078715 |
| 5             | 6             | 0           | -3.780429               | 3.113601 | 1.653048 |



|    |   |   |           |           |           |     |   |   |            |           |           |
|----|---|---|-----------|-----------|-----------|-----|---|---|------------|-----------|-----------|
| 6  | 6 | 0 | -5.225778 | 2.626668  | 1.572911  | 62  | 8 | 0 | 7.503436   | -3.553612 | -0.930974 |
| 7  | 6 | 0 | 0.823094  | 5.545640  | -2.429901 | 63  | 8 | 0 | 5.408446   | -3.140892 | -2.929274 |
| 8  | 6 | 0 | 0.503740  | 6.620983  | -1.379201 | 64  | 8 | 0 | 4.345006   | -5.999939 | -0.844115 |
| 9  | 6 | 0 | 0.102137  | 5.961135  | -0.066515 | 65  | 8 | 0 | 2.241929   | -6.085291 | -2.568729 |
| 10 | 6 | 0 | -0.975285 | 4.926101  | -0.382553 | 66  | 8 | 0 | 2.320278   | -1.584634 | 4.196058  |
| 11 | 6 | 0 | -0.358792 | 3.819577  | -1.213712 | 67  | 8 | 0 | 4.302474   | -3.184638 | 3.140074  |
| 12 | 6 | 0 | -1.219111 | 2.583858  | -1.464496 | 68  | 8 | 0 | 3.798020   | -4.382962 | 0.732773  |
| 13 | 6 | 0 | 4.916600  | 2.358793  | -3.350196 | 69  | 8 | 0 | 0.386331   | -3.853089 | 1.987999  |
| 14 | 6 | 0 | 5.426095  | 3.729360  | -2.903713 | 70  | 8 | 0 | 1.971610   | -6.632633 | 0.328084  |
| 15 | 6 | 0 | 4.313395  | 4.446527  | -2.151373 | 71  | 8 | 0 | 0.690240   | 3.132799  | 3.439250  |
| 16 | 6 | 0 | 3.058665  | 4.608909  | -2.992518 | 72  | 8 | 0 | 1.831404   | 0.682151  | 2.567286  |
| 17 | 6 | 0 | 2.658071  | 3.274468  | -3.606839 | 73  | 8 | 0 | 0.256914   | -1.525911 | 2.294832  |
| 18 | 6 | 0 | 1.616270  | 3.257150  | -4.714649 | 74  | 8 | 0 | -1.856504  | 0.733755  | 4.406496  |
| 19 | 6 | 0 | 4.357728  | -2.212285 | -2.801049 | 75  | 8 | 0 | -2.167702  | -2.778042 | 3.631012  |
| 20 | 6 | 0 | 4.498174  | -1.241823 | -3.944724 | 76  | 7 | 0 | -5.274304  | 1.174176  | 1.719213  |
| 21 | 6 | 0 | 3.479791  | -0.134349 | -3.823149 | 77  | 8 | 0 | -1.005870  | 1.570096  | -0.451657 |
| 22 | 6 | 0 | 3.455741  | 0.536576  | -2.437956 | 78  | 6 | 0 | -1.894528  | -1.853382 | -0.622068 |
| 23 | 6 | 0 | 3.538248  | -0.468694 | -1.288787 | 79  | 6 | 0 | -4.214204  | -1.758878 | 0.042265  |
| 24 | 6 | 0 | 2.186551  | -1.125915 | -0.961335 | 80  | 6 | 0 | -2.199342  | -2.769244 | 0.536052  |
| 25 | 6 | 0 | 4.653796  | -5.486042 | 0.444451  | 81  | 8 | 0 | -4.402453  | -3.648223 | -1.446916 |
| 26 | 6 | 0 | 6.062416  | -4.918941 | 0.390866  | 82  | 6 | 0 | -4.816792  | -2.548097 | -1.124015 |
| 27 | 6 | 0 | 6.113428  | -3.847369 | -0.693888 | 83  | 7 | 0 | -5.748188  | -1.856590 | -1.799945 |
| 28 | 6 | 0 | 5.494310  | -4.289168 | -2.026534 | 84  | 6 | 0 | -6.380521  | -2.429998 | -2.993299 |
| 29 | 6 | 0 | 4.149060  | -4.969842 | -1.829941 | 85  | 6 | 0 | -7.418152  | -3.509680 | -2.643745 |
| 30 | 6 | 0 | 3.564546  | -5.689865 | -3.019255 | 86  | 6 | 0 | -8.588377  | -2.959623 | -1.810971 |
| 31 | 6 | 0 | 0.555228  | -2.807201 | 2.925182  | 87  | 6 | 0 | -9.615985  | -4.054868 | -1.464525 |
| 32 | 6 | 0 | 1.967197  | -2.801634 | 3.517602  | 88  | 6 | 0 | -10.765229 | -3.559169 | -0.561694 |
| 33 | 6 | 0 | 3.027987  | -3.076672 | 2.480906  | 89  | 6 | 0 | -11.712777 | -2.562393 | -1.257820 |
| 34 | 6 | 0 | 2.793425  | -4.378299 | 1.757500  | 90  | 6 | 0 | -12.888350 | -2.146291 | -0.352377 |
| 35 | 6 | 0 | 1.414848  | -4.370747 | 1.100148  | 91  | 6 | 0 | -13.840136 | -1.149580 | -1.041994 |
| 36 | 6 | 0 | 0.915297  | -5.784493 | 0.767730  | 92  | 6 | 0 | -15.013344 | -0.738308 | -0.130635 |
| 37 | 6 | 0 | -1.279106 | 1.998524  | 4.130086  | 93  | 6 | 0 | -15.948115 | 0.314186  | -0.763076 |
| 38 | 6 | 0 | 0.204384  | 1.852451  | 3.852919  | 94  | 6 | 0 | -16.762134 | -0.219467 | -1.958097 |
| 39 | 6 | 0 | 0.399134  | 0.815988  | 2.770019  | 95  | 6 | 0 | -17.728508 | 0.845945  | -2.512082 |
| 40 | 6 | 0 | -0.173750 | -0.510702 | 3.256021  | 96  | 6 | 0 | -5.274421  | -1.113337 | 0.955673  |
| 41 | 6 | 0 | -1.684656 | -0.364964 | 3.460748  | 97  | 6 | 0 | -5.416914  | 0.356874  | 0.662707  |
| 42 | 6 | 0 | -2.366789 | -1.506575 | 4.223723  | 98  | 8 | 0 | -5.620651  | 0.761559  | -0.481057 |
| 43 | 8 | 0 | -0.957975 | 5.419168  | 3.146237  | 99  | 1 | 0 | -2.721810  | 6.127030  | 0.831400  |
| 44 | 8 | 0 | -4.561987 | 4.902035  | 3.772641  | 100 | 1 | 0 | -2.702376  | 6.416721  | 3.125515  |
| 45 | 8 | 0 | -1.840561 | 2.577666  | 2.974306  | 101 | 1 | 0 | -2.814692  | 4.437038  | 4.700272  |
| 46 | 8 | 0 | -3.845111 | 4.494622  | 1.206987  | 102 | 1 | 0 | -3.770242  | 2.376194  | 3.699509  |
| 47 | 8 | 0 | 1.638116  | 7.475695  | -1.282225 | 103 | 1 | 0 | -3.130549  | 2.553706  | 1.004408  |
| 48 | 8 | 0 | -0.426413 | 6.945152  | 0.823073  | 104 | 1 | 0 | -5.624699  | 2.875866  | 0.604210  |
| 49 | 8 | 0 | -1.546931 | 4.433082  | 0.828795  | 105 | 1 | 0 | -5.812962  | 3.099261  | 2.346150  |
| 50 | 8 | 0 | -0.126128 | 4.480410  | -2.494217 | 106 | 1 | 0 | 0.872117   | 5.976016  | -3.417092 |
| 51 | 8 | 0 | 6.627644  | 3.785214  | -2.152268 | 107 | 1 | 0 | -0.323759  | 7.228164  | -1.710238 |
| 52 | 8 | 0 | 4.734565  | 5.769381  | -1.796293 | 108 | 1 | 0 | 0.961409   | 5.460611  | 0.363950  |
| 53 | 8 | 0 | 2.076586  | 5.025202  | -2.028508 | 109 | 1 | 0 | -1.750631  | 5.382983  | -0.985688 |
| 54 | 8 | 0 | 3.818579  | 2.655530  | -4.217330 | 110 | 1 | 0 | 0.586946   | 3.510419  | -0.794923 |
| 55 | 8 | 0 | 1.491644  | 1.884651  | -5.193104 | 111 | 1 | 0 | -0.980462  | 2.204865  | -2.450205 |
| 56 | 8 | 0 | 5.780719  | -0.607509 | -3.895520 | 112 | 1 | 0 | -2.267557  | 2.826276  | -1.428871 |
| 57 | 8 | 0 | 2.176379  | -0.715709 | -4.028730 | 113 | 1 | 0 | 5.626631   | 1.791234  | -3.919542 |
| 58 | 8 | 0 | 4.468171  | 1.562957  | -2.230541 | 114 | 1 | 0 | 5.618174   | 4.262140  | -3.823336 |
| 59 | 8 | 0 | 4.505212  | -1.509413 | -1.557209 | 115 | 1 | 0 | 4.055591   | 3.872064  | -1.273079 |
| 60 | 8 | 0 | 1.440391  | -0.301314 | -0.008275 | 116 | 1 | 0 | 3.222569   | 5.378767  | -3.735108 |
| 61 | 8 | 0 | 6.447768  | -4.391007 | 1.656964  | 117 | 1 | 0 | 2.295231   | 2.673819  | -2.798136 |

|     |   |   |           |           |           |     |   |   |            |           |           |
|-----|---|---|-----------|-----------|-----------|-----|---|---|------------|-----------|-----------|
| 118 | 1 | 0 | 1.916918  | 3.906703  | -5.526043 | 174 | 1 | 0 | -7.798995  | -3.929063 | -3.570914 |
| 119 | 1 | 0 | 0.657757  | 3.545732  | -4.330193 | 175 | 1 | 0 | -6.913636  | -4.302668 | -2.105575 |
| 120 | 1 | 0 | 3.389610  | -2.679893 | -2.846357 | 176 | 1 | 0 | -9.071655  | -2.159042 | -2.361937 |
| 121 | 1 | 0 | 4.341937  | -1.773237 | -4.872425 | 177 | 1 | 0 | -8.200580  | -2.534952 | -0.891249 |
| 122 | 1 | 0 | 3.684854  | 0.603278  | -4.568163 | 178 | 1 | 0 | -10.032037 | -4.463037 | -2.381740 |
| 123 | 1 | 0 | 2.492717  | 1.004729  | -2.352049 | 179 | 1 | 0 | -9.097438  | -4.865342 | -0.960496 |
| 124 | 1 | 0 | 3.891059  | 0.034204  | -0.405739 | 180 | 1 | 0 | -11.346847 | -4.415874 | -0.233060 |
| 125 | 1 | 0 | 2.418029  | -2.077439 | -0.514299 | 181 | 1 | 0 | -10.347321 | -3.097374 | 0.328862  |
| 126 | 1 | 0 | 1.599910  | -1.262697 | -1.852230 | 182 | 1 | 0 | -11.164780 | -1.673846 | -1.552699 |
| 127 | 1 | 0 | 4.527580  | -6.283216 | 1.152093  | 183 | 1 | 0 | -12.103717 | -3.017613 | -2.163989 |
| 128 | 1 | 0 | 6.753069  | -5.707199 | 0.139720  | 184 | 1 | 0 | -13.446848 | -3.031740 | -0.061202 |
| 129 | 1 | 0 | 5.584858  | -2.986487 | -0.339019 | 185 | 1 | 0 | -12.498379 | -1.698156 | 0.557572  |
| 130 | 1 | 0 | 6.188023  | -4.960952 | -2.507423 | 186 | 1 | 0 | -13.282520 | -0.260999 | -1.326151 |
| 131 | 1 | 0 | 3.420771  | -4.273964 | -1.461891 | 187 | 1 | 0 | -14.219067 | -1.598985 | -1.953591 |
| 132 | 1 | 0 | 4.176054  | -6.550140 | -3.251142 | 188 | 1 | 0 | -15.591957 | -1.620091 | 0.131234  |
| 133 | 1 | 0 | 3.499566  | -5.039658 | -3.881319 | 189 | 1 | 0 | -14.607489 | -0.336955 | 0.793851  |
| 134 | 1 | 0 | -0.204287 | -2.983496 | 3.653469  | 190 | 1 | 0 | -16.641887 | 0.668789  | -0.005797 |
| 135 | 1 | 0 | 2.012711  | -3.582186 | 4.261970  | 191 | 1 | 0 | -15.360311 | 1.170472  | -1.082929 |
| 136 | 1 | 0 | 3.043877  | -2.272578 | 1.756842  | 192 | 1 | 0 | -16.092753 | -0.538384 | -2.748700 |
| 137 | 1 | 0 | 2.913482  | -5.213353 | 2.431473  | 193 | 1 | 0 | -17.327410 | -1.090977 | -1.641395 |
| 138 | 1 | 0 | 1.478762  | -3.754308 | 0.218550  | 194 | 1 | 0 | -18.428731 | 1.161377  | -1.745740 |
| 139 | 1 | 0 | 0.099730  | -5.725961 | 0.057239  | 195 | 1 | 0 | -17.180118 | 1.719576  | -2.848735 |
| 140 | 1 | 0 | 0.535029  | -6.197074 | 1.688046  | 196 | 1 | 0 | -18.296514 | 0.459251  | -3.351138 |
| 141 | 1 | 0 | -1.456880 | 2.597601  | 5.007281  | 197 | 1 | 0 | -6.227603  | -1.596993 | 0.790908  |
| 142 | 1 | 0 | 0.703807  | 1.520302  | 4.753850  | 198 | 1 | 0 | -4.988743  | -1.313402 | 1.972173  |
| 143 | 1 | 0 | -0.085885 | 1.153798  | 1.865594  | 199 | 6 | 0 | 7.576912   | 1.195370  | 0.142268  |
| 144 | 1 | 0 | 0.267007  | -0.743934 | 4.210288  | 200 | 6 | 0 | 7.653142   | 1.171441  | 1.690481  |
| 145 | 1 | 0 | -2.171297 | -0.141857 | 2.523359  | 201 | 6 | 0 | 7.558681   | -1.032926 | 1.110503  |
| 146 | 1 | 0 | -3.417651 | -1.255233 | 4.318980  | 202 | 6 | 0 | 7.528434   | -0.310268 | -0.258686 |
| 147 | 1 | 0 | -1.944554 | -1.506558 | 5.218354  | 203 | 6 | 0 | 8.501143   | -0.115870 | 1.941439  |
| 148 | 1 | 0 | -0.554648 | 4.538223  | 3.020065  | 204 | 6 | 0 | 6.248916   | 0.738662  | 2.168360  |
| 149 | 1 | 0 | -4.849309 | 5.155069  | 2.884147  | 205 | 6 | 0 | 6.174442   | -0.768097 | 1.757025  |
| 150 | 1 | 0 | 2.443552  | 6.939126  | -1.199008 | 206 | 6 | 0 | 9.942564   | -0.050234 | 1.398211  |
| 151 | 1 | 0 | -0.388814 | 6.610438  | 1.739804  | 207 | 6 | 0 | 8.600258   | -0.527543 | 3.420687  |
| 152 | 1 | 0 | 6.617311  | 3.176417  | -1.372405 | 208 | 6 | 0 | 8.131636   | 2.489680  | 2.284351  |
| 153 | 1 | 0 | 5.668473  | 5.728649  | -1.537487 | 209 | 8 | 0 | 6.432607   | 1.967703  | -0.314196 |
| 154 | 1 | 0 | 2.195046  | 1.724092  | -5.834755 | 210 | 1 | 0 | 8.444574   | 1.685809  | -0.270835 |
| 155 | 1 | 0 | 6.458796  | -1.278708 | -3.736570 | 211 | 1 | 0 | 6.636704   | -0.547476 | -0.824436 |
| 156 | 1 | 0 | 1.590461  | -0.026898 | -4.392396 | 212 | 1 | 0 | 8.390713   | -0.565266 | -0.862204 |
| 157 | 1 | 0 | 0.950174  | -0.853885 | 0.637180  | 213 | 1 | 0 | 6.154716   | 0.862116  | 3.239273  |
| 158 | 1 | 0 | 5.717073  | -3.908292 | 2.085245  | 214 | 1 | 0 | 2.007696   | 0.517415  | 1.624642  |
| 159 | 1 | 0 | 7.579201  | -2.721094 | -1.411495 | 215 | 1 | 0 | 6.008407   | -1.413133 | 2.603877  |
| 160 | 1 | 0 | 1.849994  | -6.755718 | -3.142377 | 216 | 1 | 0 | 5.382766   | -0.962252 | 1.045735  |
| 161 | 1 | 0 | 2.293916  | -0.807809 | 3.598429  | 217 | 1 | 0 | 7.814022   | -2.078332 | 1.054187  |
| 162 | 1 | 0 | 4.350323  | -2.528233 | 3.851225  | 218 | 1 | 0 | 10.003890  | 0.277291  | 0.370251  |
| 163 | 1 | 0 | 2.200763  | -6.500736 | -0.607527 | 219 | 1 | 0 | 10.535973  | 0.630225  | 1.999744  |
| 164 | 1 | 0 | 1.620349  | 3.061083  | 3.183579  | 220 | 1 | 0 | 10.396776  | -1.033550 | 1.461798  |
| 165 | 1 | 0 | 5.495629  | 1.347261  | 1.693616  | 221 | 1 | 0 | 9.095161   | -1.490381 | 3.493684  |
| 166 | 1 | 0 | -2.940920 | -3.081584 | 3.069213  | 222 | 1 | 0 | 9.191533   | 0.195474  | 3.973083  |
| 167 | 1 | 0 | -5.160528 | 0.780285  | 2.627487  | 223 | 1 | 0 | 7.637328   | -0.612893 | 3.901440  |
| 168 | 1 | 0 | -0.137415 | 1.143561  | -0.532341 | 224 | 1 | 0 | 7.459055   | 3.287722  | 1.987712  |
| 169 | 1 | 0 | -1.897297 | -2.426348 | -1.541804 | 225 | 1 | 0 | 8.149907   | 2.444852  | 3.367801  |
| 170 | 1 | 0 | -1.503105 | -3.386272 | 1.058860  | 226 | 1 | 0 | 9.127842   | 2.739949  | 1.934380  |
| 171 | 1 | 0 | -5.940442 | -0.905801 | -1.539140 | 227 | 1 | 0 | 5.778261   | 1.461330  | -0.819729 |
| 172 | 1 | 0 | -6.852214 | -1.617056 | -3.529566 | 228 | 6 | 0 | -3.093129  | -0.866507 | -0.562303 |
| 173 | 1 | 0 | -5.611232 | -2.860504 | -3.621266 | 229 | 1 | 0 | -2.836745  | -0.047256 | 0.090744  |

|     |   |   |           |           |           |    |   |   |           |           |           |
|-----|---|---|-----------|-----------|-----------|----|---|---|-----------|-----------|-----------|
| 230 | 1 | 0 | -3.372746 | -0.466260 | -1.521448 | 46 | 8 | 0 | -2.642334 | -4.682278 | 2.821693  |
| 231 | 1 | 0 | -0.951326 | -1.346913 | -0.503102 | 47 | 8 | 0 | -7.546511 | -3.697687 | -1.575919 |
| 232 | 7 | 0 | -3.411573 | -2.685709 | 0.879851  | 48 | 8 | 0 | -6.517212 | -5.064282 | 0.644003  |
| 233 | 8 | 0 | -4.034777 | -3.330485 | 1.958440  | 49 | 8 | 0 | -3.692338 | -3.605039 | 1.050400  |

(5S)-4b + borneol (top)

| Center Number | Atomic Number | Atomic Type | Coordinates (Angstroms) |           |           |     |   |   |           |           |           |  |
|---------------|---------------|-------------|-------------------------|-----------|-----------|-----|---|---|-----------|-----------|-----------|--|
|               |               |             | X                       | Y         | Z         |     |   |   |           |           |           |  |
| 1             | 6             | 0           | -3.813237               | -3.991161 | 2.405304  | 50  | 8 | 0 | -3.979748 | -3.844362 | -2.391742 |  |
| 2             | 6             | 0           | -4.082040               | -2.708064 | 3.239587  | 51  | 8 | 0 | -6.879345 | 1.558126  | 1.058075  |  |
| 3             | 6             | 0           | -3.110018               | -2.621557 | 4.407972  | 52  | 8 | 0 | -6.103073 | -1.051903 | 0.862919  |  |
| 4             | 6             | 0           | -1.671991               | -2.701404 | 3.906201  | 53  | 8 | 0 | -5.037285 | -1.931178 | -1.701021 |  |
| 5             | 6             | 0           | -1.463488               | -3.854223 | 2.909381  | 54  | 8 | 0 | -7.080307 | 1.054485  | -2.522466 |  |
| 6             | 6             | 0           | -0.295469               | -4.782266 | 3.276013  | 55  | 8 | 0 | -5.877589 | -1.573026 | -4.719335 |  |
| 7             | 6             | 0           | -5.236489               | -3.196767 | -2.339460 | 56  | 8 | 0 | -3.318845 | 2.599495  | 0.509920  |  |
| 8             | 6             | 0           | -6.163232               | -4.115745 | -1.559045 | 57  | 8 | 0 | -5.500742 | 5.571896  | 0.546404  |  |
| 9             | 6             | 0           | -5.747561               | -4.103175 | -0.111400 | 58  | 8 | 0 | -5.664099 | 2.469430  | -1.333868 |  |
| 10            | 6             | 0           | -4.279465               | -4.484551 | 0.068994  | 59  | 8 | 0 | -2.094609 | 4.209446  | -0.999181 |  |
| 11            | 6             | 0           | -3.386603               | -4.421091 | -1.182937 | 60  | 8 | 0 | -3.735597 | 6.663203  | -2.270400 |  |
| 12            | 6             | 0           | -3.006791               | -5.827115 | -1.636710 | 61  | 8 | 0 | 2.510128  | 7.039175  | 2.266209  |  |
| 13            | 6             | 0           | -6.916800               | 1.805284  | -1.331578 | 62  | 8 | 0 | -0.424855 | 7.418853  | 2.465440  |  |
| 14            | 6             | 0           | -7.006283               | 0.840652  | -0.174446 | 63  | 8 | 0 | -1.842583 | 5.351214  | 1.049254  |  |
| 15            | 6             | 0           | -5.922974               | -0.218560 | -0.288356 | 64  | 8 | 0 | 1.263881  | 5.612829  | -0.873442 |  |
| 16            | 6             | 0           | -6.134291               | -0.990627 | -1.591021 | 65  | 8 | 0 | -0.447826 | 4.006079  | -2.607632 |  |
| 17            | 6             | 0           | -6.121257               | -0.006699 | -2.772844 | 66  | 8 | 0 | 3.424747  | 1.910728  | 4.505999  |  |
| 18            | 6             | 0           | -6.655614               | -0.525944 | -4.109000 | 67  | 8 | 0 | 3.145245  | 4.536466  | 3.583161  |  |
| 19            | 6             | 0           | -2.769386               | 4.936149  | 0.035111  | 68  | 8 | 0 | 2.173984  | 4.636742  | 0.975427  |  |
| 20            | 6             | 0           | -3.743070               | 3.958580  | 0.694631  | 69  | 8 | 0 | 4.311331  | 1.695036  | 0.948885  |  |
| 21            | 6             | 0           | -5.202010               | 4.174820  | 0.289273  | 70  | 8 | 0 | 2.495861  | 3.209428  | -1.810823 |  |
| 22            | 6             | 0           | -5.658372               | 3.906784  | -1.147819 | 71  | 8 | 0 | -2.167847 | 0.637913  | 1.971971  |  |
| 23            | 6             | 0           | -4.896306               | 4.528606  | -2.324545 | 72  | 8 | 0 | 0.388185  | 1.852277  | 1.122123  |  |
| 24            | 6             | 0           | -5.054431               | 6.058834  | -2.427296 | 73  | 8 | 0 | 2.703527  | 0.360108  | 1.978146  |  |
| 25            | 6             | 0           | 2.124748                | 5.847130  | 0.246894  | 74  | 8 | 0 | 0.176711  | -0.519471 | 4.467674  |  |
| 26            | 6             | 0           | 1.553703                | 6.868504  | 1.224038  | 75  | 8 | 0 | 2.224352  | -2.673704 | 4.833525  |  |
| 27            | 6             | 0           | 0.200151                | 6.369055  | 1.714035  | 76  | 7 | 0 | 0.394358  | -5.207915 | 2.045776  |  |
| 28            | 6             | 0           | -0.674623               | 6.017316  | 0.528253  | 77  | 8 | 0 | -2.210362 | -5.752766 | -2.838262 |  |
| 29            | 6             | 0           | -0.010494               | 5.059415  | -0.444000 | 78  | 6 | 0 | 1.826236  | -4.712749 | 0.132937  |  |
| 30            | 6             | 0           | -0.943540               | 4.846535  | -1.623481 | 79  | 6 | 0 | 2.418651  | -6.104540 | -0.209132 |  |
| 31            | 6             | 0           | 3.898990                | 1.104959  | 2.184288  | 80  | 6 | 0 | 1.695261  | -6.499567 | -1.532476 |  |
| 32            | 6             | 0           | 3.876146                | 2.264766  | 3.184720  | 81  | 6 | 0 | 0.481102  | -5.604055 | -1.534263 |  |
| 33            | 6             | 0           | 2.974111                | 3.391266  | 2.725428  | 82  | 7 | 0 | 0.567023  | -4.700271 | -0.650822 |  |
| 34            | 6             | 0           | 3.302834                | 3.832800  | 1.314935  | 83  | 8 | 0 | -0.318372 | -3.643408 | -0.385672 |  |
| 35            | 6             | 0           | 3.324474                | 2.614068  | 0.404941  | 84  | 6 | 0 | 5.728031  | -1.974328 | 1.263003  |  |
| 36            | 6             | 0           | 3.685241                | 2.892858  | -1.049212 | 85  | 6 | 0 | 6.472921  | -0.966340 | 0.370151  |  |
| 37            | 6             | 0           | -1.058689               | -0.330392 | 3.801834  | 86  | 6 | 0 | 7.891123  | -0.687798 | 0.903806  |  |
| 38            | 6             | 0           | -0.979574               | 0.765843  | 2.747947  | 87  | 6 | 0 | 8.662782  | 0.367399  | 0.081671  |  |
| 39            | 6             | 0           | 0.278660                | 0.642400  | 1.887509  | 88  | 6 | 0 | 9.058806  | -0.128209 | -1.322939 |  |
| 40            | 6             | 0           | 1.499519                | 0.461829  | 2.793419  | 89  | 6 | 0 | 9.781810  | 0.942179  | -2.169289 |  |
| 41            | 6             | 0           | 1.285342                | -0.823997 | 3.576860  | 90  | 6 | 0 | 11.133116 | 1.426503  | -1.597339 |  |
| 42            | 6             | 0           | 2.433816                | -1.306449 | 4.439831  | 91  | 6 | 0 | 12.191679 | 0.319581  | -1.405453 |  |
| 43            | 8             | 0           | -4.068175               | -1.497719 | 2.476164  | 92  | 6 | 0 | 12.609837 | -0.369964 | -2.718576 |  |
| 44            | 8             | 0           | -3.432806               | -3.713778 | 5.277672  | 93  | 6 | 0 | 13.749044 | -1.385384 | -2.504940 |  |
| 45            | 8             | 0           | -1.420278               | -1.513319 | 3.114062  | 94  | 6 | 0 | 14.170899 | -2.084762 | -3.811062 |  |
|               |               |             |                         |           |           | 95  | 1 | 0 | -4.618359 | -4.692983 | 2.535990  |  |
|               |               |             |                         |           |           | 96  | 1 | 0 | -5.076081 | -2.786148 | 3.648655  |  |
|               |               |             |                         |           |           | 97  | 1 | 0 | -3.270055 | -1.670869 | 4.900067  |  |
|               |               |             |                         |           |           | 98  | 1 | 0 | -0.966166 | -2.733639 | 4.725207  |  |
|               |               |             |                         |           |           | 99  | 1 | 0 | -1.274692 | -3.411746 | 1.945205  |  |
|               |               |             |                         |           |           | 100 | 1 | 0 | -0.684897 | -5.642708 | 3.797320  |  |
|               |               |             |                         |           |           | 101 | 1 | 0 | 0.423784  | -4.269330 | 3.890506  |  |

|     |   |   |           |           |           |     |   |   |           |           |           |
|-----|---|---|-----------|-----------|-----------|-----|---|---|-----------|-----------|-----------|
| 102 | 1 | 0 | -5.550756 | -3.046878 | -3.352126 | 158 | 1 | 0 | 2.956779  | 4.288008  | 4.499171  |
| 103 | 1 | 0 | -6.068844 | -5.112286 | -1.971799 | 159 | 1 | 0 | 3.086413  | 6.152615  | -0.131426 |
| 104 | 1 | 0 | -5.890418 | -3.110056 | 0.269932  | 160 | 1 | 0 | -2.494307 | 1.457331  | 1.541941  |
| 105 | 1 | 0 | -4.274074 | -5.499140 | 0.446113  | 161 | 1 | 0 | 0.233572  | 1.710947  | 0.161405  |
| 106 | 1 | 0 | -2.496785 | -3.870629 | -0.940629 | 162 | 1 | 0 | 2.337207  | -3.235034 | 4.047168  |
| 107 | 1 | 0 | -3.896831 | -6.418643 | -1.816959 | 163 | 1 | 0 | -0.168553 | -5.708508 | 1.391144  |
| 108 | 1 | 0 | -2.406835 | -6.314241 | -0.883595 | 164 | 1 | 0 | 2.156454  | -6.808521 | 0.569147  |
| 109 | 1 | 0 | -7.726209 | 2.517993  | -1.310890 | 165 | 1 | 0 | 3.487452  | -6.035412 | -0.293790 |
| 110 | 1 | 0 | -7.968303 | 0.347017  | -0.226274 | 166 | 1 | 0 | 1.423831  | -7.545598 | -1.562095 |
| 111 | 1 | 0 | -4.956240 | 0.264265  | -0.287000 | 167 | 1 | 0 | -0.377331 | -5.662873 | -2.178437 |
| 112 | 1 | 0 | -7.069710 | -1.520313 | -1.536637 | 168 | 1 | 0 | 2.306048  | -6.284393 | -2.402781 |
| 113 | 1 | 0 | -5.127801 | 0.403183  | -2.869926 | 169 | 1 | 0 | -2.606099 | -5.071294 | -3.403255 |
| 114 | 1 | 0 | -6.746085 | 0.325995  | -4.769002 | 170 | 1 | 0 | 5.690170  | -1.617138 | 2.286307  |
| 115 | 1 | 0 | -7.640370 | -0.934553 | -3.949837 | 171 | 1 | 0 | 6.232902  | -2.926983 | 1.259174  |
| 116 | 1 | 0 | -3.250190 | 5.793909  | -0.384491 | 172 | 1 | 0 | 5.911257  | -0.040671 | 0.322159  |
| 117 | 1 | 0 | -3.684097 | 4.158346  | 1.752960  | 173 | 1 | 0 | 6.519761  | -1.379320 | -0.630110 |
| 118 | 1 | 0 | -5.806488 | 3.514633  | 0.891742  | 174 | 1 | 0 | 7.814563  | -0.338966 | 1.931221  |
| 119 | 1 | 0 | -6.681836 | 4.264359  | -1.180223 | 175 | 1 | 0 | 8.460969  | -1.612878 | 0.925307  |
| 120 | 1 | 0 | -5.296550 | 4.056439  | -3.212783 | 176 | 1 | 0 | 8.053182  | 1.262403  | -0.010852 |
| 121 | 1 | 0 | -5.711118 | 6.426921  | -1.655554 | 177 | 1 | 0 | 9.558235  | 0.642587  | 0.628167  |
| 122 | 1 | 0 | -5.454934 | 6.327081  | -3.397208 | 178 | 1 | 0 | 9.683725  | -1.009949 | -1.226528 |
| 123 | 1 | 0 | 2.147438  | 4.112768  | -1.677772 | 179 | 1 | 0 | 8.166558  | -0.432500 | -1.859068 |
| 124 | 1 | 0 | 1.425898  | 7.823545  | 0.741736  | 180 | 1 | 0 | 9.125155  | 1.802370  | -2.270837 |
| 125 | 1 | 0 | 0.340120  | 5.480941  | 2.310217  | 181 | 1 | 0 | 9.937121  | 0.551291  | -3.169138 |
| 126 | 1 | 0 | -0.954645 | 6.934256  | 0.020985  | 182 | 1 | 0 | 11.538825 | 2.177360  | -2.270153 |
| 127 | 1 | 0 | 0.150003  | 4.120602  | 0.053977  | 183 | 1 | 0 | 10.964874 | 1.920889  | -0.646523 |
| 128 | 1 | 0 | -1.250151 | 5.768847  | -2.082954 | 184 | 1 | 0 | 13.073679 | 0.765960  | -0.954089 |
| 129 | 1 | 0 | -3.848841 | 4.292383  | -2.269890 | 185 | 1 | 0 | 11.827043 | -0.427339 | -0.708004 |
| 130 | 1 | 0 | 4.679720  | 0.412585  | 2.442591  | 186 | 1 | 0 | 12.932299 | 0.384566  | -3.431337 |
| 131 | 1 | 0 | 4.889695  | 2.645048  | 3.216467  | 187 | 1 | 0 | 11.759013 | -0.883291 | -3.154028 |
| 132 | 1 | 0 | 1.944819  | 3.081442  | 2.705067  | 188 | 1 | 0 | 13.431032 | -2.135362 | -1.785613 |
| 133 | 1 | 0 | 4.229902  | 4.390981  | 1.289187  | 189 | 1 | 0 | 14.609081 | -0.875688 | -2.079231 |
| 134 | 1 | 0 | 2.356042  | 2.158581  | 0.454236  | 190 | 1 | 0 | 13.312536 | -2.596233 | -4.235982 |
| 135 | 1 | 0 | 4.087248  | 1.988008  | -1.473057 | 191 | 1 | 0 | 14.488271 | -1.336245 | -4.530768 |
| 136 | 1 | 0 | 4.423801  | 3.678991  | -1.144252 | 192 | 6 | 0 | 0.359736  | 0.435615  | -2.337133 |
| 137 | 1 | 0 | -1.777334 | -0.080014 | 4.564062  | 193 | 6 | 0 | -1.081907 | -0.088732 | -2.534572 |
| 138 | 1 | 0 | -0.920805 | 1.723456  | 3.251918  | 194 | 6 | 0 | -0.266001 | 0.119218  | -4.660718 |
| 139 | 1 | 0 | 0.179474  | -0.220978 | 1.245786  | 195 | 6 | 0 | 0.904689  | 0.631461  | -3.786643 |
| 140 | 1 | 0 | 1.588020  | 1.263576  | 3.495627  | 196 | 6 | 0 | -0.867632 | -1.015411 | -3.778840 |
| 141 | 1 | 0 | 1.012585  | -1.618380 | 2.903557  | 197 | 6 | 0 | -1.915192 | 1.064633  | -3.141319 |
| 142 | 1 | 0 | 2.477397  | -0.708975 | 5.335476  | 198 | 6 | 0 | -1.354891 | 1.222639  | -4.593818 |
| 143 | 1 | 0 | 3.357613  | -1.206490 | 3.884696  | 199 | 6 | 0 | 0.089532  | -2.200310 | -3.525935 |
| 144 | 1 | 0 | -3.177307 | -1.160774 | 2.259496  | 200 | 6 | 0 | -2.169699 | -1.604633 | -4.345507 |
| 145 | 1 | 0 | -2.908318 | -3.685871 | 6.088641  | 201 | 6 | 0 | -1.695143 | -0.710624 | -1.285117 |
| 146 | 1 | 0 | -7.962288 | -3.893857 | -2.426116 | 202 | 8 | 0 | 0.396034  | 1.673120  | -1.563825 |
| 147 | 1 | 0 | -7.450147 | -4.812535 | 0.596642  | 203 | 1 | 0 | 0.940497  | -0.296245 | -1.793809 |
| 148 | 1 | 0 | -6.655457 | 0.904218  | 1.738502  | 204 | 1 | 0 | 1.121620  | 1.674511  | -3.973405 |
| 149 | 1 | 0 | -5.271009 | -1.229860 | 1.370479  | 205 | 1 | 0 | 1.812964  | 0.065313  | -3.944340 |
| 150 | 1 | 0 | -4.990145 | -1.266480 | -4.943579 | 206 | 1 | 0 | -2.960030 | 0.788738  | -3.149364 |
| 151 | 1 | 0 | -2.989801 | 2.499703  | -0.395104 | 207 | 1 | 0 | -1.827899 | 1.975139  | -2.577423 |
| 152 | 1 | 0 | -5.803935 | 5.707282  | 1.452905  | 208 | 1 | 0 | -2.125784 | 1.071029  | -5.338437 |
| 153 | 1 | 0 | -3.803670 | 7.626449  | -2.312405 | 209 | 1 | 0 | -0.933682 | 2.207789  | -4.742368 |
| 154 | 1 | 0 | 2.630576  | 6.218003  | 2.777966  | 210 | 1 | 0 | 0.021342  | -0.169650 | -5.661929 |
| 155 | 1 | 0 | -1.290755 | 7.108387  | 2.765589  | 211 | 1 | 0 | 1.105293  | -1.886467 | -3.326698 |
| 156 | 1 | 0 | -0.258836 | 3.113358  | -2.253509 | 212 | 1 | 0 | -0.251136 | -2.779803 | -2.676744 |
| 157 | 1 | 0 | 4.096539  | 1.433992  | 5.010348  | 213 | 1 | 0 | 0.115780  | -2.839630 | -4.403568 |

|     |   |   |           |           |           |    |   |   |           |           |           |
|-----|---|---|-----------|-----------|-----------|----|---|---|-----------|-----------|-----------|
| 214 | 1 | 0 | -1.953651 | -2.123146 | -5.275637 | 31 | 6 | 0 | 2.499042  | 0.705823  | 0.203159  |
| 215 | 1 | 0 | -2.607557 | -2.308890 | -3.650528 | 32 | 6 | 0 | 2.387756  | 2.204483  | 0.000034  |
| 216 | 1 | 0 | -2.902249 | -0.838659 | -4.557375 | 33 | 6 | 0 | 1.170470  | 2.488682  | -0.855724 |
| 217 | 1 | 0 | -1.783724 | 0.018848  | -0.488044 | 34 | 6 | 0 | 1.183874  | 1.744080  | -2.194715 |
| 218 | 1 | 0 | -2.687931 | -1.094220 | -1.488781 | 35 | 6 | 0 | 1.547680  | 0.278142  | -1.967818 |
| 219 | 1 | 0 | -1.090356 | -1.530328 | -0.918497 | 36 | 6 | 0 | 1.892752  | -0.523414 | -3.208016 |
| 220 | 1 | 0 | 1.266204  | 2.140290  | -1.679158 | 37 | 6 | 0 | -0.966089 | -1.158130 | 3.722955  |
| 221 | 6 | 0 | 15.311290 | -3.095939 | -3.583855 | 38 | 6 | 0 | -1.708345 | -0.208538 | 2.809226  |
| 222 | 1 | 0 | 15.004621 | -3.864870 | -2.882575 | 39 | 6 | 0 | -0.883295 | 0.043269  | 1.550296  |
| 223 | 1 | 0 | 15.595985 | -3.578833 | -4.512232 | 40 | 6 | 0 | 0.557476  | 0.451838  | 1.859736  |
| 224 | 1 | 0 | 16.186381 | -2.598713 | -3.178763 | 41 | 6 | 0 | 1.194264  | -0.391076 | 2.958544  |
| 225 | 6 | 0 | 2.634861  | -3.499619 | -0.332276 | 42 | 6 | 0 | 2.495929  | 0.169233  | 3.549407  |
| 226 | 1 | 0 | 2.789436  | -3.595864 | -1.401504 | 43 | 8 | 0 | -2.680595 | -4.449671 | 2.815215  |
| 227 | 1 | 0 | 2.038404  | -2.620839 | -0.153524 | 44 | 8 | 0 | 0.466549  | -5.547473 | 4.257482  |
| 228 | 6 | 0 | 4.013461  | -3.417474 | 0.296520  | 45 | 8 | 0 | -0.792985 | -2.364725 | 2.982183  |
| 229 | 7 | 0 | 4.364819  | -2.216165 | 0.780357  | 46 | 8 | 0 | 0.639288  | -4.905371 | 1.541557  |
| 230 | 1 | 0 | 3.678392  | -1.500988 | 0.917180  | 47 | 8 | 0 | -5.634802 | -5.602926 | -0.760140 |
| 231 | 8 | 0 | 4.776544  | -4.379229 | 0.267169  | 48 | 8 | 0 | -3.441918 | -5.998510 | 0.774422  |
| 232 | 6 | 0 | 1.449673  | -4.524384 | 1.595905  | 49 | 8 | 0 | -1.306030 | -3.992472 | 0.642517  |
| 233 | 8 | 0 | 2.123857  | -3.768374 | 2.295243  | 50 | 8 | 0 | -3.220229 | -3.434949 | -2.425680 |

(5S)-4b + borneol (bottom)

| Center Number | Atomic Number | Atomic Type | Coordinates (Angstroms) |   |   |
|---------------|---------------|-------------|-------------------------|---|---|
|               |               |             | X                       | Y | Z |

|    |   |   |           |           |           |    |   |   |           |           |           |
|----|---|---|-----------|-----------|-----------|----|---|---|-----------|-----------|-----------|
| 1  | 6 | 0 | -0.754901 | -5.069840 | 1.400197  | 51 | 8 | 0 | -8.233166 | -1.904593 | 2.174966  |
| 2  | 6 | 0 | -1.413021 | -5.118681 | 2.805177  | 52 | 8 | 0 | -6.454734 | -3.775285 | 1.150058  |
| 3  | 6 | 0 | -0.509870 | -4.549409 | 3.895698  | 53 | 8 | 0 | -5.070668 | -2.828480 | -1.234549 |
| 4  | 6 | 0 | 0.215435  | -3.318393 | 3.394140  | 54 | 8 | 0 | -8.279497 | -1.061168 | -1.345537 |
| 5  | 6 | 0 | 1.057573  | -3.665177 | 2.156836  | 55 | 8 | 0 | -5.957636 | -2.180800 | -3.931219 |
| 6  | 6 | 0 | 2.518781  | -3.896709 | 2.504849  | 56 | 8 | 0 | -4.328433 | 0.782964  | 0.636282  |
| 7  | 6 | 0 | -4.528944 | -3.849644 | -2.054176 | 57 | 8 | 0 | -6.666320 | 3.574825  | 1.188112  |
| 8  | 6 | 0 | -4.357207 | -5.121621 | -1.239329 | 58 | 8 | 0 | -7.306964 | 0.129240  | 0.417094  |
| 9  | 6 | 0 | -3.493740 | -4.810053 | -0.038183 | 59 | 8 | 0 | -4.787053 | 1.185283  | -1.782994 |
| 10 | 6 | 0 | -2.123010 | -4.335578 | -0.494354 | 60 | 8 | 0 | -7.296320 | 4.330395  | -1.230203 |
| 11 | 6 | 0 | -2.341924 | -3.073499 | -1.326342 | 61 | 8 | 0 | 0.401542  | 4.320464  | -3.693924 |
| 12 | 6 | 0 | -1.109930 | -2.491632 | -1.974072 | 62 | 8 | 0 | -2.097239 | 5.368800  | -2.527404 |
| 13 | 6 | 0 | -8.332342 | -0.776730 | 0.053157  | 63 | 8 | 0 | -3.538363 | 3.130140  | -1.188869 |
| 14 | 6 | 0 | -8.090657 | -2.086378 | 0.765756  | 64 | 8 | 0 | -1.941502 | 1.556468  | -4.038025 |
| 15 | 6 | 0 | -6.690209 | -2.548570 | 0.434857  | 65 | 8 | 0 | -3.957518 | -0.405706 | -3.240179 |
| 16 | 6 | 0 | -6.499892 | -2.700574 | -1.068520 | 66 | 8 | 0 | 2.187821  | 2.947278  | 1.227360  |
| 17 | 6 | 0 | -6.964518 | -1.455641 | -1.821261 | 67 | 8 | 0 | 1.141647  | 3.912131  | -1.128434 |
| 18 | 6 | 0 | -7.146328 | -1.672886 | -3.318346 | 68 | 8 | 0 | -0.179944 | 1.728678  | -2.622988 |
| 19 | 6 | 0 | -4.787972 | 2.441596  | -1.077422 | 69 | 8 | 0 | 2.731656  | 0.213283  | -1.124375 |
| 20 | 6 | 0 | -4.939303 | 2.077060  | 0.406363  | 70 | 8 | 0 | 0.690987  | -0.530079 | -4.029464 |
| 21 | 6 | 0 | -6.352537 | 2.174998  | 1.007915  | 71 | 8 | 0 | -2.949041 | -0.849425 | 2.495997  |
| 22 | 6 | 0 | -7.567123 | 1.549048  | 0.303612  | 72 | 8 | 0 | -1.445233 | 1.139225  | 0.792283  |
| 23 | 6 | 0 | -7.910544 | 1.924582  | -1.151745 | 73 | 8 | 0 | 1.290206  | 0.118283  | 0.641720  |
| 24 | 6 | 0 | -8.359345 | 3.371919  | -1.380078 | 74 | 8 | 0 | 0.285835  | -0.588805 | 4.069634  |
| 25 | 6 | 0 | -0.681402 | 2.201124  | -3.869130 | 75 | 8 | 0 | 3.494845  | -0.849308 | 3.712065  |
| 26 | 6 | 0 | -0.886106 | 3.702472  | -3.754090 | 76 | 7 | 0 | 3.276793  | -4.065283 | 1.262950  |
| 27 | 6 | 0 | -1.741891 | 3.975089  | -2.518198 | 77 | 8 | 0 | -1.510732 | -1.195777 | -2.490633 |
| 28 | 6 | 0 | -2.992668 | 3.119038  | -2.528701 | 78 | 6 | 0 | 4.584719  | -3.369030 | -0.653927 |
| 29 | 6 | 0 | -2.728714 | 1.661061  | -2.841036 | 79 | 6 | 0 | 5.706483  | -4.437198 | -0.560833 |
| 30 | 6 | 0 | -4.054656 | 0.962625  | -3.034982 | 80 | 6 | 0 | 5.400479  | -5.421462 | -1.732436 |
|    |   |   |           |           |           | 81 | 6 | 0 | 3.969637  | -5.092415 | -2.074292 |
|    |   |   |           |           |           | 82 | 7 | 0 | 3.560601  | -4.037836 | -1.505890 |
|    |   |   |           |           |           | 83 | 8 | 0 | 2.331239  | -3.408259 | -1.641014 |
|    |   |   |           |           |           | 84 | 6 | 0 | 6.796111  | 1.002785  | -0.206569 |
|    |   |   |           |           |           | 85 | 6 | 0 | 8.014302  | 1.164887  | -1.131205 |
|    |   |   |           |           |           | 86 | 6 | 0 | 9.029299  | 2.169302  | -0.554917 |

|     |   |   |           |           |           |     |   |   |           |           |           |
|-----|---|---|-----------|-----------|-----------|-----|---|---|-----------|-----------|-----------|
| 87  | 6 | 0 | 10.254962 | 2.395243  | -1.466906 | 143 | 1 | 0 | 2.715847  | -0.063844 | -3.740846 |
| 88  | 6 | 0 | 11.183678 | 1.167854  | -1.547286 | 144 | 1 | 0 | -1.496559 | -1.333020 | 4.643224  |
| 89  | 6 | 0 | 12.373621 | 1.362482  | -2.511887 | 145 | 1 | 0 | -1.849248 | 0.728442  | 3.335642  |
| 90  | 6 | 0 | 13.350920 | 2.495230  | -2.125305 | 146 | 1 | 0 | -0.871257 | -0.870688 | 0.980400  |
| 91  | 6 | 0 | 14.011368 | 2.338629  | -0.738973 | 147 | 1 | 0 | 0.602360  | 1.505758  | 2.061186  |
| 92  | 6 | 0 | 14.889573 | 1.078817  | -0.611523 | 148 | 1 | 0 | 1.420898  | -1.328147 | 2.500349  |
| 93  | 6 | 0 | 15.623695 | 1.016207  | 0.741859  | 149 | 1 | 0 | 2.270152  | 0.547505  | 4.532430  |
| 94  | 6 | 0 | 16.500351 | -0.242739 | 0.881750  | 150 | 1 | 0 | 2.858567  | 0.990863  | 2.944916  |
| 95  | 6 | 0 | 17.229704 | -0.292283 | 2.238282  | 151 | 1 | 0 | -2.551624 | -3.511917 | 2.580711  |
| 96  | 6 | 0 | 4.943047  | -2.079435 | -1.373893 | 152 | 1 | 0 | 0.662083  | -5.515731 | 5.202624  |
| 97  | 6 | 0 | 6.016186  | -1.266988 | -0.679019 | 153 | 1 | 0 | -5.442741 | -6.359988 | -0.182705 |
| 98  | 7 | 0 | 5.811151  | 0.060955  | -0.745596 | 154 | 1 | 0 | -3.452660 | -5.685019 | 1.697438  |
| 99  | 8 | 0 | 7.017481  | -1.765289 | -0.179235 | 155 | 1 | 0 | -7.774647 | -2.638303 | 2.611744  |
| 100 | 6 | 0 | 3.931794  | -3.056961 | 0.690644  | 156 | 1 | 0 | -6.277882 | -4.502201 | 0.527922  |
| 101 | 8 | 0 | 4.082653  | -1.947377 | 1.204855  | 157 | 1 | 0 | -5.204527 | -1.572625 | -3.778072 |
| 102 | 1 | 0 | -0.902890 | -6.001229 | 0.885542  | 158 | 1 | 0 | -4.599075 | 0.205268  | -0.097198 |
| 103 | 1 | 0 | -1.600106 | -6.148481 | 3.060983  | 159 | 1 | 0 | -5.971188 | 4.047028  | 1.689374  |
| 104 | 1 | 0 | -1.150683 | -4.295790 | 4.729568  | 160 | 1 | 0 | -7.040649 | 4.312243  | -0.286539 |
| 105 | 1 | 0 | 0.834359  | -2.883385 | 4.164564  | 161 | 1 | 0 | 0.700062  | 4.402544  | -2.770502 |
| 106 | 1 | 0 | 0.950714  | -2.882486 | 1.426887  | 162 | 1 | 0 | -2.587015 | 5.576030  | -1.721133 |
| 107 | 1 | 0 | 2.575250  | -4.799955 | 3.090047  | 163 | 1 | 0 | -3.098980 | -0.810661 | -2.944319 |
| 108 | 1 | 0 | 2.923876  | -3.064805 | 3.054311  | 164 | 1 | 0 | 3.023457  | 3.166752  | 1.658920  |
| 109 | 1 | 0 | -5.095494 | -3.966315 | -2.955145 | 165 | 1 | 0 | 1.081806  | 4.395002  | -0.293723 |
| 110 | 1 | 0 | -3.890135 | -5.873051 | -1.860723 | 166 | 1 | 0 | -0.049136 | 1.922831  | -4.690728 |
| 111 | 1 | 0 | -3.972471 | -4.023197 | 0.518355  | 167 | 1 | 0 | -3.556156 | -0.264751 | 2.007216  |
| 112 | 1 | 0 | -1.635532 | -5.102063 | -1.085575 | 168 | 1 | 0 | -2.380946 | 0.995687  | 0.564487  |
| 113 | 1 | 0 | -2.806975 | -2.324252 | -0.708808 | 169 | 1 | 0 | 3.831975  | -1.155521 | 2.850627  |
| 114 | 1 | 0 | -0.789902 | -3.144084 | -2.774426 | 170 | 1 | 0 | 3.005208  | -4.855472 | 0.715981  |
| 115 | 1 | 0 | -0.314730 | -2.391502 | -1.251737 | 171 | 1 | 0 | 5.627260  | -4.961900 | 0.379954  |
| 116 | 1 | 0 | -9.309649 | -0.371684 | 0.260597  | 172 | 1 | 0 | 6.668194  | -3.961947 | -0.622922 |
| 117 | 1 | 0 | -8.808774 | -2.802536 | 0.384621  | 173 | 1 | 0 | 5.518577  | -6.456023 | -1.440851 |
| 118 | 1 | 0 | -5.999674 | -1.803739 | 0.790294  | 174 | 1 | 0 | 3.332626  | -5.628239 | -2.742649 |
| 119 | 1 | 0 | -7.012145 | -3.583845 | -1.423283 | 175 | 1 | 0 | 6.036988  | -5.236274 | -2.590821 |
| 120 | 1 | 0 | -6.253215 | -0.673540 | -1.641532 | 176 | 1 | 0 | -0.836441 | -0.810715 | -3.085355 |
| 121 | 1 | 0 | -7.466793 | -0.736251 | -3.761204 | 177 | 1 | 0 | 6.302049  | 1.957495  | -0.071321 |
| 122 | 1 | 0 | -7.928053 | -2.401245 | -3.473161 | 178 | 1 | 0 | 7.124466  | 0.642886  | 0.759271  |
| 123 | 1 | 0 | -5.569347 | 3.083242  | -1.433222 | 179 | 1 | 0 | 7.677641  | 1.502261  | -2.106528 |
| 124 | 1 | 0 | -4.340033 | 2.789443  | 0.943243  | 180 | 1 | 0 | 8.467227  | 0.189918  | -1.245148 |
| 125 | 1 | 0 | -6.301612 | 1.678453  | 1.966871  | 181 | 1 | 0 | 8.529767  | 3.122417  | -0.398963 |
| 126 | 1 | 0 | -8.416807 | 1.800111  | 0.929803  | 182 | 1 | 0 | 9.367966  | 1.822223  | 0.417577  |
| 127 | 1 | 0 | -8.725914 | 1.280678  | -1.451823 | 183 | 1 | 0 | 9.914778  | 2.656277  | -2.465638 |
| 128 | 1 | 0 | -9.186064 | 3.608811  | -0.716067 | 184 | 1 | 0 | 10.814576 | 3.242915  | -1.087225 |
| 129 | 1 | 0 | -8.713817 | 3.466727  | -2.395805 | 185 | 1 | 0 | 11.546419 | 0.930260  | -0.552760 |
| 130 | 1 | 0 | 0.798096  | -1.081064 | -4.815042 | 186 | 1 | 0 | 10.613680 | 0.309719  | -1.885890 |
| 131 | 1 | 0 | -1.399459 | 4.067459  | -4.629148 | 187 | 1 | 0 | 11.982315 | 1.571998  | -3.504044 |
| 132 | 1 | 0 | -1.178249 | 3.727989  | -1.639324 | 188 | 1 | 0 | 12.920534 | 0.428593  | -2.585052 |
| 133 | 1 | 0 | -3.697759 | 3.549948  | -3.230909 | 189 | 1 | 0 | 14.134895 | 2.540622  | -2.876544 |
| 134 | 1 | 0 | -2.209763 | 1.212329  | -2.016701 | 190 | 1 | 0 | 12.831224 | 3.446731  | -2.162077 |
| 135 | 1 | 0 | -4.614718 | 1.401581  | -3.842925 | 191 | 1 | 0 | 14.631966 | 3.211807  | -0.556461 |
| 136 | 1 | 0 | -7.083203 | 1.674035  | -1.793359 | 192 | 1 | 0 | 13.252018 | 2.326699  | 0.035991  |
| 137 | 1 | 0 | 3.343857  | 0.393032  | 0.786807  | 193 | 1 | 0 | 15.620729 | 1.070252  | -1.415688 |
| 138 | 1 | 0 | 3.276575  | 2.548955  | -0.510922 | 194 | 1 | 0 | 14.278265 | 0.189225  | -0.720831 |
| 139 | 1 | 0 | 0.279350  | 2.184485  | -0.333770 | 195 | 1 | 0 | 14.893990 | 1.033691  | 1.547002  |
| 140 | 1 | 0 | 1.831810  | 2.242597  | -2.900385 | 196 | 1 | 0 | 16.246979 | 1.899248  | 0.853363  |
| 141 | 1 | 0 | 0.721472  | -0.178472 | -1.462342 | 197 | 1 | 0 | 15.877823 | -1.125643 | 0.772693  |
| 142 | 1 | 0 | 2.147422  | -1.526380 | -2.898769 | 198 | 1 | 0 | 17.229468 | -0.261588 | 0.077370  |

|     |   |   |           |           |           |    |   |   |           |           |           |
|-----|---|---|-----------|-----------|-----------|----|---|---|-----------|-----------|-----------|
| 199 | 1 | 0 | 16.515484 | -0.295789 | 3.054965  | 14 | 6 | 0 | -0.998649 | 1.757500  | 5.251519  |
| 200 | 1 | 0 | 17.841880 | -1.183696 | 2.320410  | 15 | 6 | 0 | -1.947292 | 0.697994  | 4.719365  |
| 201 | 1 | 0 | 17.873865 | 0.572711  | 2.356408  | 16 | 6 | 0 | -2.977030 | 1.305491  | 3.799109  |
| 202 | 1 | 0 | 5.320131  | -2.333466 | -2.359974 | 17 | 6 | 0 | -2.325001 | 2.113113  | 2.684366  |
| 203 | 1 | 0 | 4.041901  | -1.504247 | -1.471967 | 18 | 6 | 0 | -3.299133 | 3.051644  | 1.995351  |
| 204 | 1 | 0 | 4.944898  | 0.391981  | -1.114654 | 19 | 6 | 0 | 3.878711  | 1.859028  | 2.391732  |
| 205 | 6 | 0 | -3.002683 | 4.507979  | 3.661729  | 20 | 6 | 0 | 2.972909  | 3.042522  | 2.655729  |
| 206 | 6 | 0 | -1.479333 | 4.768296  | 3.511686  | 21 | 6 | 0 | 1.688896  | 2.801285  | 1.872220  |
| 207 | 6 | 0 | -2.419940 | 6.350597  | 2.172344  | 22 | 6 | 0 | 1.045155  | 1.438576  | 2.187435  |
| 208 | 6 | 0 | -3.639092 | 5.633928  | 2.802459  | 23 | 6 | 0 | 2.054028  | 0.288750  | 2.226525  |
| 209 | 6 | 0 | -1.413820 | 6.316637  | 3.367514  | 24 | 6 | 0 | 2.355120  | -0.307093 | 0.849683  |
| 210 | 6 | 0 | -1.092970 | 4.281228  | 2.096332  | 25 | 6 | 0 | 7.234167  | -1.193366 | 1.477584  |
| 211 | 6 | 0 | -1.793731 | 5.337468  | 1.175236  | 26 | 6 | 0 | 7.115157  | -1.173224 | 2.992587  |
| 212 | 6 | 0 | -1.873674 | 7.071329  | 4.631091  | 27 | 6 | 0 | 5.925200  | -0.291305 | 3.338001  |
| 213 | 6 | 0 | -0.015532 | 6.849905  | 3.011469  | 28 | 6 | 0 | 6.190737  | 1.111780  | 2.787627  |
| 214 | 6 | 0 | -2.747823 | 7.710105  | 1.562059  | 29 | 6 | 0 | 6.533524  | 1.126128  | 1.294878  |
| 215 | 8 | 0 | -4.539843 | 5.053422  | 1.815014  | 30 | 6 | 0 | 7.182846  | 2.429873  | 0.877114  |
| 216 | 1 | 0 | -3.281577 | 3.543840  | 3.262202  | 31 | 6 | 0 | 3.845316  | -4.746777 | -0.842874 |
| 217 | 1 | 0 | -3.331711 | 4.563019  | 4.690202  | 32 | 6 | 0 | 4.188144  | -4.855159 | 0.631288  |
| 218 | 1 | 0 | -4.214781 | 6.322826  | 3.403806  | 33 | 6 | 0 | 4.511039  | -3.475286 | 1.173016  |
| 219 | 1 | 0 | -0.019456 | 4.276802  | 1.962252  | 34 | 6 | 0 | 5.739971  | -2.936658 | 0.466987  |
| 220 | 1 | 0 | -1.088138 | 5.834141  | 0.520166  | 35 | 6 | 0 | 5.443039  | -2.854960 | -1.035910 |
| 221 | 1 | 0 | -2.547615 | 4.868370  | 0.562265  | 36 | 6 | 0 | 6.706419  | -2.669752 | -1.886840 |
| 222 | 1 | 0 | -0.881544 | 4.353507  | 4.310769  | 37 | 6 | 0 | -1.324957 | -5.577674 | -0.969424 |
| 223 | 1 | 0 | -1.142146 | 6.926717  | 5.419535  | 38 | 6 | 0 | -0.609483 | -5.254926 | 0.343794  |
| 224 | 1 | 0 | -1.937690 | 8.135936  | 4.432641  | 39 | 6 | 0 | 0.435348  | -4.187390 | 0.092392  |
| 225 | 1 | 0 | -2.830133 | 6.740756  | 5.009104  | 40 | 6 | 0 | 1.396053  | -4.774908 | -0.933015 |
| 226 | 1 | 0 | -0.041209 | 7.929922  | 2.912244  | 41 | 6 | 0 | 0.618622  | -4.810856 | -2.244220 |
| 227 | 1 | 0 | 0.679274  | 6.607674  | 3.809590  | 42 | 6 | 0 | 1.434033  | -5.215145 | -3.460794 |
| 228 | 1 | 0 | 0.371675  | 6.438336  | 2.091930  | 43 | 8 | 0 | -4.289776 | -5.064932 | 0.703955  |
| 229 | 1 | 0 | -1.855696 | 8.176233  | 1.160596  | 44 | 8 | 0 | -5.208277 | -5.724275 | -2.817528 |
| 230 | 1 | 0 | -3.453812 | 7.609215  | 0.740932  | 45 | 8 | 0 | -2.131490 | -4.455586 | -1.241884 |
| 231 | 1 | 0 | -3.184640 | 8.378091  | 2.296696  | 46 | 8 | 0 | -5.163731 | -3.181772 | -2.166039 |
| 232 | 1 | 0 | -4.735011 | 5.687415  | 1.110871  | 47 | 8 | 0 | -5.098239 | -1.523691 | 4.729741  |
| 233 | 1 | 0 | -1.441882 | 3.281529  | 1.887970  | 48 | 8 | 0 | -5.592468 | -3.454986 | 2.553519  |
|     |   |   |           |           |           | 49 | 8 | 0 | -4.702579 | -2.581732 | 0.029870  |
|     |   |   |           |           |           | 50 | 8 | 0 | -5.445807 | 0.570084  | 1.746467  |
|     |   |   |           |           |           | 51 | 8 | 0 | -0.033704 | 1.124830  | 6.104714  |
|     |   |   |           |           |           | 52 | 8 | 0 | -2.678680 | 0.072191  | 5.786608  |
|     |   |   |           |           |           | 53 | 8 | 0 | -3.669181 | 0.197490  | 3.204664  |
|     |   |   |           |           |           | 54 | 8 | 0 | -1.294099 | 2.996955  | 3.207084  |
|     |   |   |           |           |           | 55 | 8 | 0 | -2.611374 | 3.807140  | 0.979924  |
|     |   |   |           |           |           | 56 | 8 | 0 | 2.646589  | 3.151565  | 4.042840  |
|     |   |   |           |           |           | 57 | 8 | 0 | 2.159627  | 2.804027  | 0.516043  |
|     |   |   |           |           |           | 58 | 8 | 0 | 0.393800  | 1.361476  | 3.468786  |
|     |   |   |           |           |           | 59 | 8 | 0 | 3.257831  | 0.682589  | 2.914210  |
|     |   |   |           |           |           | 60 | 8 | 0 | 1.426029  | -1.393299 | 0.628599  |
|     |   |   |           |           |           | 61 | 8 | 0 | 7.034401  | -2.506708 | 3.468915  |
|     |   |   |           |           |           | 62 | 8 | 0 | 5.790339  | -0.199442 | 4.760386  |
|     |   |   |           |           |           | 63 | 8 | 0 | 5.101633  | 2.041941  | 3.064902  |
|     |   |   |           |           |           | 64 | 8 | 0 | 7.521830  | 0.105912  | 0.986212  |
|     |   |   |           |           |           | 65 | 8 | 0 | 7.521996  | 2.388851  | -0.520929 |
|     |   |   |           |           |           | 66 | 8 | 0 | 3.147822  | -5.458839 | 1.395349  |
|     |   |   |           |           |           | 67 | 8 | 0 | 4.758955  | -3.584829 | 2.584621  |
|     |   |   |           |           |           | 68 | 8 | 0 | 5.966834  | -1.585661 | 0.901137  |
|     |   |   |           |           |           | 69 | 8 | 0 | 4.859234  | -4.084414 | -1.563129 |

**(5S)-4a + borneol (top)**

| Center Number | Atomic Number | Atomic Type | Coordinates (Angstroms) |           |           |
|---------------|---------------|-------------|-------------------------|-----------|-----------|
|               |               |             | X                       | Y         | Z         |
| 1             | 6             | 0           | -5.442585               | -3.448915 | -0.788386 |
| 2             | 6             | 0           | -5.024814               | -4.922484 | -0.508982 |
| 3             | 6             | 0           | -4.294840               | -5.501936 | -1.732993 |
| 4             | 6             | 0           | -3.176050               | -4.580908 | -2.234172 |
| 5             | 6             | 0           | -3.739910               | -3.155890 | -2.431114 |
| 6             | 6             | 0           | -3.637280               | -2.583120 | -3.835916 |
| 7             | 6             | 0           | -5.086132               | 0.196206  | 3.062484  |
| 8             | 6             | 0           | -5.524671               | -1.220913 | 3.404476  |
| 9             | 6             | 0           | -4.989533               | -2.178568 | 2.350576  |
| 10            | 6             | 0           | -5.372936               | -1.693805 | 0.952815  |
| 11            | 6             | 0           | -4.932052               | -0.268861 | 0.672619  |
| 12            | 6             | 0           | -5.555597               | 0.394285  | -0.555826 |
| 13            | 6             | 0           | -0.317462               | 2.433232  | 4.071266  |

|     |   |   |            |           |           |     |   |   |           |           |           |
|-----|---|---|------------|-----------|-----------|-----|---|---|-----------|-----------|-----------|
| 70  | 8 | 0 | 7.698040   | -1.847171 | -1.263313 | 126 | 1 | 0 | 0.313521  | 1.229289  | 1.417342  |
| 71  | 8 | 0 | -1.599949  | -4.799249 | 1.265157  | 127 | 1 | 0 | 1.625032  | -0.495324 | 2.823902  |
| 72  | 8 | 0 | 1.071767   | -3.847999 | 1.335202  | 128 | 1 | 0 | 3.356900  | -0.706415 | 0.861217  |
| 73  | 8 | 0 | 2.618184   | -4.009927 | -1.015505 | 129 | 1 | 0 | 2.260957  | 0.421725  | 0.063272  |
| 74  | 8 | 0 | -0.394765  | -5.825686 | -2.031064 | 130 | 1 | 0 | 8.015302  | -1.844808 | 1.137851  |
| 75  | 8 | 0 | 2.312170   | -4.129458 | -3.842415 | 131 | 1 | 0 | 8.018095  | -0.743543 | 3.398100  |
| 76  | 7 | 0 | -2.287890  | -2.075340 | -4.119886 | 132 | 1 | 0 | 5.045023  | -0.713713 | 2.898990  |
| 77  | 8 | 0 | -5.245794  | -0.216054 | -1.809631 | 133 | 1 | 0 | 7.017478  | 1.513665  | 3.354374  |
| 78  | 6 | 0 | 1.879754   | -1.467911 | -2.517144 | 134 | 1 | 0 | 5.667917  | 0.933416  | 0.687208  |
| 79  | 7 | 0 | 0.756162   | -0.920055 | -2.341258 | 135 | 1 | 0 | 8.063436  | 2.595723  | 1.485376  |
| 80  | 8 | 0 | -0.219800  | -1.231404 | -1.372705 | 136 | 1 | 0 | 6.498494  | 3.247953  | 1.008970  |
| 81  | 6 | 0 | 1.797496   | 0.418703  | -3.971514 | 137 | 1 | 0 | 3.741611  | -5.724887 | -1.284999 |
| 82  | 6 | 0 | 0.421990   | 0.171909  | -3.274722 | 138 | 1 | 0 | 5.058462  | -5.487206 | 0.728724  |
| 83  | 6 | 0 | 2.609148   | -0.880015 | -3.689739 | 139 | 1 | 0 | 3.673371  | -2.821327 | 0.993596  |
| 84  | 8 | 0 | 0.953273   | 1.756562  | -1.595162 | 140 | 1 | 0 | 6.595562  | -3.562202 | 0.677750  |
| 85  | 6 | 0 | 0.080505   | 1.386906  | -2.389594 | 141 | 1 | 0 | 4.746598  | -2.039772 | -1.165987 |
| 86  | 7 | 0 | -1.054954  | 2.012963  | -2.600298 | 142 | 1 | 0 | 6.431940  | -2.303991 | -2.869028 |
| 87  | 6 | 0 | -1.359129  | 3.318250  | -1.976509 | 143 | 1 | 0 | 7.154453  | -3.642491 | -1.999888 |
| 88  | 6 | 0 | -2.499193  | 3.987154  | -2.759662 | 144 | 1 | 0 | -1.899433 | -6.481661 | -0.884092 |
| 89  | 6 | 0 | -3.864516  | 3.322906  | -2.485854 | 145 | 1 | 0 | -0.123214 | -6.149154 | 0.713965  |
| 90  | 6 | 0 | -4.958587  | 3.804376  | -3.457912 | 146 | 1 | 0 | -0.038304 | -3.309628 | -0.314697 |
| 91  | 6 | 0 | -6.326367  | 3.133483  | -3.198643 | 147 | 1 | 0 | 1.647606  | -5.790829 | -0.664316 |
| 92  | 6 | 0 | -7.064595  | 3.726075  | -1.981389 | 148 | 1 | 0 | 0.152846  | -3.854389 | -2.428084 |
| 93  | 6 | 0 | -8.444920  | 3.077240  | -1.762309 | 149 | 1 | 0 | 0.767514  | -5.388724 | -4.290053 |
| 94  | 6 | 0 | -9.183555  | 3.659992  | -0.541807 | 150 | 1 | 0 | 1.978667  | -6.131010 | -3.268210 |
| 95  | 6 | 0 | -10.566572 | 3.011762  | -0.333743 | 151 | 1 | 0 | -3.384657 | -4.701104 | 0.676716  |
| 96  | 6 | 0 | -11.304411 | 3.518335  | 0.923413  | 152 | 1 | 0 | -5.650270 | -4.884307 | -3.007744 |
| 97  | 6 | 0 | -11.752484 | 4.989888  | 0.827189  | 153 | 1 | 0 | -4.218326 | -1.151919 | 4.909310  |
| 98  | 6 | 0 | -12.542462 | 5.429143  | 2.075772  | 154 | 1 | 0 | -5.118696 | -4.140915 | 2.043510  |
| 99  | 6 | 0 | -0.610102  | -0.328479 | -4.293488 | 155 | 1 | 0 | 0.674935  | 0.774638  | 5.543570  |
| 100 | 6 | 0 | -1.936830  | -0.841299 | -3.752604 | 156 | 1 | 0 | -2.064250 | -0.192971 | 6.486779  |
| 101 | 8 | 0 | -2.698290  | -0.098224 | -3.126912 | 157 | 1 | 0 | -1.880095 | 4.276661  | 1.405716  |
| 102 | 1 | 0 | -6.501891  | -3.299148 | -0.668738 | 158 | 1 | 0 | 3.439479  | 3.002653  | 4.576703  |
| 103 | 1 | 0 | -5.918176  | -5.513625 | -0.383220 | 159 | 1 | 0 | 1.521255  | 2.568426  | -0.185743 |
| 104 | 1 | 0 | -3.910464  | -6.470442 | -1.463671 | 160 | 1 | 0 | 0.722622  | -1.217779 | -0.058002 |
| 105 | 1 | 0 | -2.767062  | -4.991902 | -3.146744 | 161 | 1 | 0 | 6.152698  | -2.892382 | 3.309530  |
| 106 | 1 | 0 | -3.259885  | -2.506714 | -1.723984 | 162 | 1 | 0 | 4.919174  | 0.174221  | 4.953376  |
| 107 | 1 | 0 | -4.333300  | -1.761312 | -3.883810 | 163 | 1 | 0 | 8.169676  | 1.684903  | -0.663217 |
| 108 | 1 | 0 | -3.897500  | -3.320308 | -4.581969 | 164 | 1 | 0 | 2.358973  | -4.864449 | 1.475472  |
| 109 | 1 | 0 | -5.537536  | 0.915833  | 3.726520  | 165 | 1 | 0 | 4.206357  | -4.289112 | 2.956464  |
| 110 | 1 | 0 | -6.602071  | -1.277980 | 3.392731  | 166 | 1 | 0 | 7.372760  | -0.965406 | -1.036821 |
| 111 | 1 | 0 | -3.909868  | -2.212964 | 2.415987  | 167 | 1 | 0 | -1.169444 | -4.422192 | 2.045635  |
| 112 | 1 | 0 | -6.446348  | -1.782157 | 0.844417  | 168 | 1 | 0 | 1.285155  | -2.873704 | 1.284237  |
| 113 | 1 | 0 | -3.853152  | -0.230137 | 0.649973  | 169 | 1 | 0 | 3.107838  | -4.123269 | -3.293443 |
| 114 | 1 | 0 | -5.268145  | 1.436505  | -0.533377 | 170 | 1 | 0 | -1.640317 | -2.662803 | -4.597041 |
| 115 | 1 | 0 | -6.627548  | 0.348025  | -0.445758 | 171 | 1 | 0 | -4.316075 | -0.123722 | -2.066335 |
| 116 | 1 | 0 | 0.354858   | 3.218323  | 4.355113  | 172 | 1 | 0 | 2.206999  | -2.274519 | -1.898765 |
| 117 | 1 | 0 | -1.536047  | 2.481994  | 5.842787  | 173 | 1 | 0 | 3.643034  | -0.666561 | -3.457938 |
| 118 | 1 | 0 | -1.378521  | -0.031640 | 4.166262  | 174 | 1 | 0 | 2.575923  | -1.602904 | -4.496281 |
| 119 | 1 | 0 | -3.655835  | 1.912807  | 4.385816  | 175 | 1 | 0 | 1.686630  | 0.620976  | -5.025723 |
| 120 | 1 | 0 | -1.893732  | 1.426476  | 1.974051  | 176 | 1 | 0 | 2.284414  | 1.246794  | -3.485305 |
| 121 | 1 | 0 | -3.722332  | 3.716123  | 2.739592  | 177 | 1 | 0 | -1.821059 | 1.491616  | -2.989114 |
| 122 | 1 | 0 | -4.086780  | 2.496151  | 1.521156  | 178 | 1 | 0 | -1.649711 | 3.198073  | -0.943606 |
| 123 | 1 | 0 | 4.012152   | 1.768595  | 1.333397  | 179 | 1 | 0 | -0.458668 | 3.915214  | -2.022801 |
| 124 | 1 | 0 | 3.444978   | 3.937560  | 2.278414  | 180 | 1 | 0 | -2.552500 | 5.030865  | -2.469823 |
| 125 | 1 | 0 | 0.975119   | 3.591085  | 2.054583  | 181 | 1 | 0 | -2.265292 | 3.952429  | -3.819334 |



|     |   |   |            |           |           | Center | Atomic | Atomic | Coordinates (Angstroms) |           |           |
|-----|---|---|------------|-----------|-----------|--------|--------|--------|-------------------------|-----------|-----------|
|     |   |   |            |           |           | Number | Number | Type   | X                       | Y         | Z         |
| 182 | 1 | 0 | -4.136022  | 3.538621  | -1.459223 |        |        |        |                         |           |           |
| 183 | 1 | 0 | -3.786316  | 2.245896  | -2.582129 |        |        |        |                         |           |           |
| 184 | 1 | 0 | -5.063551  | 4.884032  | -3.392568 |        |        |        |                         |           |           |
| 185 | 1 | 0 | -4.637481  | 3.575539  | -4.470765 | 1      | 6      | 0      | 3.268424                | 3.528305  | 2.188101  |
| 186 | 1 | 0 | -6.955768  | 3.262126  | -4.074810 | 2      | 6      | 0      | 2.044601                | 4.146982  | 2.933225  |
| 187 | 1 | 0 | -6.181700  | 2.066280  | -3.055796 | 3      | 6      | 0      | 1.484217                | 5.335401  | 2.134717  |
| 188 | 1 | 0 | -6.466459  | 3.596310  | -1.085629 | 4      | 6      | 0      | 1.283860                | 5.100065  | 0.623791  |
| 189 | 1 | 0 | -7.193273  | 4.794882  | -2.130574 | 5      | 6      | 0      | 2.306606                | 4.090779  | 0.101800  |
| 190 | 1 | 0 | -9.052604  | 3.221634  | -2.651669 | 6      | 6      | 0      | 2.841250                | 4.317279  | -1.304858 |
| 191 | 1 | 0 | -8.320012  | 2.006715  | -1.629095 | 7      | 6      | 0      | 4.281401                | -1.650893 | 2.863194  |
| 192 | 1 | 0 | -8.580241  | 3.503168  | 0.348438  | 8      | 6      | 0      | 3.739661                | -0.804120 | 4.015008  |
| 193 | 1 | 0 | -9.292688  | 4.731070  | -0.674833 | 9      | 6      | 0      | 2.981556                | 0.382835  | 3.446821  |
| 194 | 1 | 0 | -11.184498 | 3.192804  | -1.209218 | 10     | 6      | 0      | 3.839481                | 1.130296  | 2.430877  |
| 195 | 1 | 0 | -10.434483 | 1.936377  | -0.253387 | 11     | 6      | 0      | 4.269520                | 0.219120  | 1.296555  |
| 196 | 1 | 0 | -12.183623 | 2.901522  | 1.087931  | 12     | 6      | 0      | 5.269454                | 0.810992  | 0.303995  |
| 197 | 1 | 0 | -10.661642 | 3.394728  | 1.790875  | 13     | 6      | 0      | 1.271034                | -5.020706 | 0.064099  |
| 198 | 1 | 0 | -10.887849 | 5.632692  | 0.708524  | 14     | 6      | 0      | 1.453768                | -5.440999 | 1.516054  |
| 199 | 1 | 0 | -12.372405 | 5.114991  | -0.055719 | 15     | 6      | 0      | 1.862599                | -4.200296 | 2.293509  |
| 200 | 1 | 0 | -13.429962 | 4.817679  | 2.200407  | 16     | 6      | 0      | 3.105691                | -3.551919 | 1.726546  |
| 201 | 1 | 0 | -11.933430 | 5.325784  | 2.967774  | 17     | 6      | 0      | 3.067176                | -3.391500 | 0.210100  |
| 202 | 1 | 0 | -12.853438 | 6.465171  | 1.996780  | 18     | 6      | 0      | 4.456175                | -3.263613 | -0.388765 |
| 203 | 1 | 0 | -0.848594  | 0.496626  | -4.955638 | 19     | 6      | 0      | -3.106877               | -3.913404 | -0.832060 |
| 204 | 1 | 0 | -0.129798  | -1.094912 | -4.885675 | 20     | 6      | 0      | -2.094936               | -4.849939 | -1.458390 |
| 205 | 6 | 0 | 6.602181   | 5.311798  | -2.235500 | 21     | 6      | 0      | -0.915973               | -4.024577 | -1.945089 |
| 206 | 6 | 0 | 5.175183   | 5.700203  | -1.760316 | 22     | 6      | 0      | -0.299789               | -3.190373 | -0.823773 |
| 207 | 6 | 0 | 4.852812   | 4.950504  | -3.883498 | 23     | 6      | 0      | -1.338297               | -2.408901 | -0.020206 |
| 208 | 6 | 0 | 6.371662   | 4.743207  | -3.676549 | 24     | 6      | 0      | -1.668618               | -1.037384 | -0.596565 |
| 209 | 6 | 0 | 4.279877   | 4.637568  | -2.470421 | 25     | 6      | 0      | -7.049526               | -1.818763 | 0.282706  |
| 210 | 6 | 0 | 4.806819   | 6.980771  | -2.538249 | 26     | 6      | 0      | -6.469392               | -2.378046 | 1.576886  |
| 211 | 6 | 0 | 4.641248   | 6.482713  | -4.008008 | 27     | 6      | 0      | -5.165375               | -3.072532 | 1.208250  |
| 212 | 6 | 0 | 2.761897   | 4.878692  | -2.349748 | 28     | 6      | 0      | -5.388916               | -4.124692 | 0.115087  |
| 213 | 6 | 0 | 4.538069   | 3.189892  | -2.008025 | 29     | 6      | 0      | -6.115819               | -3.532305 | -1.084152 |
| 214 | 6 | 0 | 5.047735   | 5.875825  | -0.253674 | 30     | 6      | 0      | -6.554909               | -4.526047 | -2.127786 |
| 215 | 8 | 0 | 5.851334   | 7.958090  | -2.355457 | 31     | 6      | 0      | -5.229225               | 2.823991  | -1.647614 |
| 216 | 1 | 0 | 7.230697   | 6.186898  | -2.238217 | 32     | 6      | 0      | -6.248280               | 2.709579  | -0.516793 |
| 217 | 1 | 0 | 7.038968   | 4.560946  | -1.593680 | 33     | 6      | 0      | -6.075067               | 1.352272  | 0.133677  |
| 218 | 1 | 0 | 6.948069   | 5.273667  | -4.424021 | 34     | 6      | 0      | -6.346096               | 0.270659  | -0.877440 |
| 219 | 1 | 0 | 6.638022   | 3.695347  | -3.726803 | 35     | 6      | 0      | -5.390194               | 0.398416  | -2.049690 |
| 220 | 1 | 0 | 3.876082   | 7.386926  | -2.161203 | 36     | 6      | 0      | -5.772370               | -0.527724 | -3.221538 |
| 221 | 1 | 0 | 3.665552   | 6.729581  | -4.407298 | 37     | 6      | 0      | -1.069596               | 5.593775  | 0.238686  |
| 222 | 1 | 0 | 5.398153   | 6.934448  | -4.636095 | 38     | 6      | 0      | -2.190911               | 5.183330  | 1.169376  |
| 223 | 1 | 0 | 4.424467   | 4.376270  | -4.694175 | 39     | 6      | 0      | -2.723359               | 3.836110  | 0.722643  |
| 224 | 1 | 0 | 2.233447   | 4.138834  | -2.943681 | 40     | 6      | 0      | -3.312448               | 4.014510  | -0.673338 |
| 225 | 1 | 0 | 2.452051   | 4.740972  | -1.320500 | 41     | 6      | 0      | -2.196833               | 4.468666  | -1.621997 |
| 226 | 1 | 0 | 2.450072   | 5.858480  | -2.683487 | 42     | 6      | 0      | -2.684510               | 4.978610  | -2.968229 |
| 227 | 1 | 0 | 3.974892   | 2.994895  | -1.103601 | 43     | 8      | 0      | 1.088553                | 3.168703  | 3.321711  |
| 228 | 1 | 0 | 4.174268   | 2.504822  | -2.771335 | 44     | 8      | 0      | 2.427971                | 6.421738  | 2.271219  |
| 229 | 1 | 0 | 5.577933   | 2.972302  | -1.820431 | 45     | 8      | 0      | -0.041050               | 4.625296  | 0.302165  |
| 230 | 1 | 0 | 5.342369   | 4.973059  | 0.266883  | 46     | 8      | 0      | 3.461455                | 4.246860  | 0.969557  |
| 231 | 1 | 0 | 5.693105   | 6.686107  | 0.066490  | 47     | 8      | 0      | 2.914944                | -1.623933 | 4.851036  |
| 232 | 1 | 0 | 4.027995   | 6.117199  | 0.029774  | 48     | 8      | 0      | 2.656570                | 1.267159  | 4.521701  |
| 233 | 1 | 0 | 5.617621   | 8.789614  | -2.788139 | 49     | 8      | 0      | 3.001185                | 2.176577  | 1.906263  |
|     |   |   |            |           |           | 50     | 8      | 0      | 4.995651                | -0.887794 | 1.904653  |
|     |   |   |            |           |           | 51     | 8      | 0      | 0.219429                | -5.937028 | 2.051050  |
|     |   |   |            |           |           | 52     | 8      | 0      | 2.169279                | -4.491055 | 3.670298  |
|     |   |   |            |           |           | 53     | 8      | 0      | 3.121314                | -2.225687 | 2.283433  |

(5S)-4a + borneol (bottom)

|     |   |   |           |           |           |     |   |   |           |           |           |
|-----|---|---|-----------|-----------|-----------|-----|---|---|-----------|-----------|-----------|
| 54  | 8 | 0 | 2.505800  | -4.555059 | -0.454190 | 110 | 1 | 0 | 4.557182  | -0.430648 | 4.612870  |
| 55  | 8 | 0 | 4.355078  | -3.198280 | -1.824386 | 111 | 1 | 0 | 2.098877  | 0.034036  | 2.934681  |
| 56  | 8 | 0 | -1.658044 | -5.814963 | -0.491737 | 112 | 1 | 0 | 4.707139  | 1.550401  | 2.924499  |
| 57  | 8 | 0 | -1.529417 | -3.153674 | -2.905191 | 113 | 1 | 0 | 3.389885  | -0.146270 | 0.787355  |
| 58  | 8 | 0 | 0.312224  | -3.990493 | 0.197794  | 114 | 1 | 0 | 5.641499  | -0.001400 | -0.310240 |
| 59  | 8 | 0 | -2.505220 | -3.216326 | 0.260989  | 115 | 1 | 0 | 6.104556  | 1.218653  | 0.852826  |
| 60  | 8 | 0 | -0.557292 | -0.208911 | -0.191016 | 116 | 1 | 0 | 0.926770  | -5.819023 | -0.566483 |
| 61  | 8 | 0 | -6.216845 | -1.323904 | 2.510467  | 117 | 1 | 0 | 2.201836  | -6.214303 | 1.597702  |
| 62  | 8 | 0 | -4.614647 | -3.727769 | 2.353414  | 118 | 1 | 0 | 1.060409  | -3.490294 | 2.234802  |
| 63  | 8 | 0 | -4.139629 | -4.733652 | -0.323266 | 119 | 1 | 0 | 3.970717  | -4.117461 | 2.050952  |
| 64  | 8 | 0 | -7.316528 | -2.883269 | -0.617034 | 120 | 1 | 0 | 2.469222  | -2.525026 | -0.014907 |
| 65  | 8 | 0 | -6.907812 | -3.723053 | -3.286843 | 121 | 1 | 0 | 5.043908  | -4.124572 | -0.092388 |
| 66  | 8 | 0 | -6.143913 | 3.755501  | 0.449658  | 122 | 1 | 0 | 4.935939  | -2.366938 | -0.042002 |
| 67  | 8 | 0 | -7.006525 | 1.162824  | 1.221611  | 123 | 1 | 0 | -3.459270 | -3.219192 | -1.569924 |
| 68  | 8 | 0 | -6.033077 | -0.980352 | -0.253997 | 124 | 1 | 0 | -2.554988 | -5.328728 | -2.311169 |
| 69  | 8 | 0 | -5.399367 | 1.763313  | -2.562663 | 125 | 1 | 0 | -0.168989 | -4.667385 | -2.393863 |
| 70  | 8 | 0 | -7.136449 | -0.947954 | -3.137147 | 126 | 1 | 0 | 0.417743  | -2.490971 | -1.229923 |
| 71  | 8 | 0 | -1.663952 | 5.154760  | 2.494110  | 127 | 1 | 0 | -0.897325 | -2.226772 | 0.936741  |
| 72  | 8 | 0 | -3.782225 | 3.457457  | 1.642888  | 128 | 1 | 0 | -2.599507 | -0.689782 | -0.168026 |
| 73  | 8 | 0 | -3.896574 | 2.761706  | -1.098617 | 129 | 1 | 0 | -1.751639 | -1.075097 | -1.670028 |
| 74  | 8 | 0 | -1.598044 | 5.679234  | -1.078146 | 130 | 1 | 0 | -7.967975 | -1.278519 | 0.431831  |
| 75  | 8 | 0 | -3.275363 | 3.888186  | -3.707908 | 131 | 1 | 0 | -7.163553 | -3.087345 | 2.003200  |
| 76  | 7 | 0 | 1.897851  | 3.881615  | -2.341293 | 132 | 1 | 0 | -4.507295 | -2.308962 | 0.850939  |
| 77  | 8 | 0 | 4.730961  | 1.871669  | -0.484919 | 133 | 1 | 0 | -5.952535 | -4.940259 | 0.541778  |
| 78  | 6 | 0 | -2.089313 | 1.440762  | -3.344037 | 134 | 1 | 0 | -5.489876 | -2.802088 | -1.558092 |
| 79  | 7 | 0 | -0.871813 | 1.543947  | -3.024812 | 135 | 1 | 0 | -7.408258 | -5.077839 | -1.760147 |
| 80  | 8 | 0 | -0.334182 | 1.906898  | -1.773884 | 136 | 1 | 0 | -5.745319 | -5.200620 | -2.365825 |
| 81  | 6 | 0 | -0.834959 | 1.289017  | -5.361662 | 137 | 1 | 0 | -5.353725 | 3.733323  | -2.205072 |
| 82  | 6 | 0 | 0.096980  | 1.297740  | -4.105656 | 138 | 1 | 0 | -7.235279 | 2.779011  | -0.948731 |
| 83  | 6 | 0 | -2.255533 | 1.036309  | -4.778356 | 139 | 1 | 0 | -5.064086 | 1.263391  | 0.500026  |
| 84  | 8 | 0 | -0.243168 | -1.036791 | -3.915670 | 140 | 1 | 0 | -7.365955 | 0.295652  | -1.219402 |
| 85  | 6 | 0 | 0.615457  | -0.143283 | -3.936449 | 141 | 1 | 0 | -4.398578 | 0.168252  | -1.692591 |
| 86  | 7 | 0 | 1.914212  | -0.340346 | -3.929974 | 142 | 1 | 0 | -5.105002 | -1.378961 | -3.230468 |
| 87  | 6 | 0 | 2.511938  | -1.684025 | -4.030047 | 143 | 1 | 0 | -5.617844 | 0.038781  | -4.128742 |
| 88  | 6 | 0 | 3.772802  | -1.630717 | -4.908422 | 144 | 1 | 0 | -0.704588 | 6.577461  | 0.484709  |
| 89  | 6 | 0 | 4.934044  | -0.886888 | -4.217896 | 145 | 1 | 0 | -2.983637 | 5.916694  | 1.084670  |
| 90  | 6 | 0 | 6.192419  | -0.828706 | -5.104890 | 146 | 1 | 0 | -1.934092 | 3.100175  | 0.734107  |
| 91  | 6 | 0 | 7.344948  | -0.023423 | -4.468281 | 147 | 1 | 0 | -4.084702 | 4.770203  | -0.624365 |
| 92  | 6 | 0 | 7.924521  | -0.677853 | -3.199023 | 148 | 1 | 0 | -1.459663 | 3.687482  | -1.699786 |
| 93  | 6 | 0 | 9.112312  | 0.117939  | -2.624540 | 149 | 1 | 0 | -1.839422 | 5.396640  | -3.499513 |
| 94  | 6 | 0 | 9.686049  | -0.522784 | -1.345772 | 150 | 1 | 0 | -3.398744 | 5.772683  | -2.791910 |
| 95  | 6 | 0 | 10.874528 | 0.276819  | -0.776376 | 151 | 1 | 0 | 0.676508  | 2.628027  | 2.612022  |
| 96  | 6 | 0 | 11.427622 | -0.295088 | 0.545937  | 152 | 1 | 0 | 3.249811  | 6.153286  | 1.834966  |
| 97  | 6 | 0 | 12.125233 | -1.660098 | 0.386054  | 153 | 1 | 0 | 2.594278  | -2.400063 | 4.364733  |
| 98  | 6 | 0 | 12.718828 | -2.157612 | 1.718751  | 154 | 1 | 0 | 2.035620  | 1.956733  | 4.211102  |
| 99  | 6 | 0 | 1.084866  | 2.467202  | -4.139633 | 155 | 1 | 0 | -0.509718 | -5.556034 | 1.535579  |
| 100 | 6 | 0 | 1.981304  | 2.686265  | -2.923976 | 156 | 1 | 0 | 1.422983  | -4.959771 | 4.072055  |
| 101 | 8 | 0 | 2.844938  | 1.847294  | -2.632158 | 157 | 1 | 0 | 3.871265  | -3.984585 | -2.115320 |
| 102 | 1 | 0 | 4.181644  | 3.642388  | 2.747927  | 158 | 1 | 0 | -2.442632 | -6.172292 | -0.048935 |
| 103 | 1 | 0 | 2.396077  | 4.581307  | 3.855187  | 159 | 1 | 0 | -0.929147 | -2.506453 | -3.325848 |
| 104 | 1 | 0 | 0.555441  | 5.638960  | 2.579305  | 160 | 1 | 0 | -0.444105 | 0.586879  | -0.773947 |
| 105 | 1 | 0 | 1.436802  | 6.067177  | 0.159555  | 161 | 1 | 0 | -6.446441 | -0.454376 | 2.139467  |
| 106 | 1 | 0 | 1.915904  | 3.093022  | 0.189571  | 162 | 1 | 0 | -3.663524 | -3.823326 | 2.203760  |
| 107 | 1 | 0 | 3.744097  | 3.737351  | -1.382213 | 163 | 1 | 0 | -7.407819 | -4.224392 | -3.942062 |
| 108 | 1 | 0 | 3.071739  | 5.362697  | -1.460858 | 164 | 1 | 0 | -5.318103 | 3.672558  | 0.975801  |
| 109 | 1 | 0 | 4.957165  | -2.415835 | 3.212186  | 165 | 1 | 0 | -7.164742 | 2.008821  | 1.666950  |

|     |   |   |           |           |           |     |   |   |           |           |           |
|-----|---|---|-----------|-----------|-----------|-----|---|---|-----------|-----------|-----------|
| 166 | 1 | 0 | -7.201331 | -1.920734 | -3.101470 | 200 | 1 | 0 | 13.450259 | -1.451628 | 2.097854  |
| 167 | 1 | 0 | -2.363748 | 4.988700  | 3.138229  | 201 | 1 | 0 | 11.939098 | -2.269158 | 2.464925  |
| 168 | 1 | 0 | -3.552680 | 2.670100  | 2.151783  | 202 | 1 | 0 | 13.207779 | -3.117706 | 1.594404  |
| 169 | 1 | 0 | -3.819983 | 4.210590  | -4.436754 | 203 | 1 | 0 | 1.753987  | 2.322586  | -4.980805 |
| 170 | 1 | 0 | 1.069533  | 4.423601  | -2.464894 | 204 | 1 | 0 | 0.506235  | 3.359159  | -4.327983 |
| 171 | 1 | 0 | 4.076095  | 1.580275  | -1.138509 | 205 | 6 | 0 | -0.519913 | 0.589178  | 3.563327  |
| 172 | 1 | 0 | -2.866670 | 1.652138  | -2.646772 | 206 | 6 | 0 | -1.891937 | 0.925417  | 4.187738  |
| 173 | 1 | 0 | -2.506341 | -0.014108 | -4.825266 | 207 | 6 | 0 | -1.797632 | -1.345302 | 4.301852  |
| 174 | 1 | 0 | -3.020429 | 1.628489  | -5.253177 | 208 | 6 | 0 | -0.460776 | -0.970177 | 3.613343  |
| 175 | 1 | 0 | -0.805753 | 2.261118  | -5.834593 | 209 | 6 | 0 | -2.001072 | -0.167090 | 5.296122  |
| 176 | 1 | 0 | -0.545650 | 0.535963  | -6.076078 | 210 | 6 | 0 | -2.945408 | 0.459045  | 3.154416  |
| 177 | 1 | 0 | 2.510008  | 0.417968  | -3.632530 | 211 | 6 | 0 | -2.907405 | -1.103027 | 3.249975  |
| 178 | 1 | 0 | 2.782386  | -2.048289 | -3.050485 | 212 | 6 | 0 | -0.912082 | -0.091775 | 6.386177  |
| 179 | 1 | 0 | 1.765682  | -2.333840 | -4.463042 | 213 | 6 | 0 | -3.363879 | -0.197238 | 6.009109  |
| 180 | 1 | 0 | 4.087010  | -2.649779 | -5.111975 | 214 | 6 | 0 | -1.995463 | 2.386179  | 4.608037  |
| 181 | 1 | 0 | 3.526757  | -1.163478 | -5.856593 | 215 | 8 | 0 | -0.344012 | 1.199729  | 2.254353  |
| 182 | 1 | 0 | 5.146880  | -1.410727 | -3.296378 | 216 | 1 | 0 | 0.260505  | 0.997472  | 4.171868  |
| 183 | 1 | 0 | 4.635229  | 0.127271  | -3.968916 | 217 | 1 | 0 | -0.398686 | -1.389510 | 2.621230  |
| 184 | 1 | 0 | 6.533509  | -1.839511 | -5.312245 | 218 | 1 | 0 | 0.407767  | -1.293182 | 4.169321  |
| 185 | 1 | 0 | 5.932154  | -0.375975 | -6.058409 | 219 | 1 | 0 | -3.936492 | 0.826445  | 3.398459  |
| 186 | 1 | 0 | 8.142751  | 0.086256  | -5.197810 | 220 | 1 | 0 | -2.668096 | 0.808917  | 2.168146  |
| 187 | 1 | 0 | 6.991810  | 0.975228  | -4.226129 | 221 | 1 | 0 | -3.867700 | -1.501744 | 3.531811  |
| 188 | 1 | 0 | 7.153911  | -0.754739 | -2.440463 | 222 | 1 | 0 | -2.646706 | -1.554870 | 2.304872  |
| 189 | 1 | 0 | 8.248726  | -1.688134 | -3.434224 | 223 | 1 | 0 | -1.811325 | -2.330435 | 4.746399  |
| 190 | 1 | 0 | 9.896135  | 0.185459  | -3.374410 | 224 | 1 | 0 | 0.098018  | -0.070857 | 6.003005  |
| 191 | 1 | 0 | 8.789073  | 1.131162  | -2.402411 | 225 | 1 | 0 | -1.057726 | 0.792543  | 6.998011  |
| 192 | 1 | 0 | 8.903602  | -0.579644 | -0.593718 | 226 | 1 | 0 | -1.000166 | -0.957190 | 7.035750  |
| 193 | 1 | 0 | 9.995250  | -1.538313 | -1.569027 | 227 | 1 | 0 | -3.408380 | -1.057337 | 6.669868  |
| 194 | 1 | 0 | 11.672331 | 0.310588  | -1.513644 | 228 | 1 | 0 | -3.485472 | 0.693693  | 6.617305  |
| 195 | 1 | 0 | 10.551672 | 1.300410  | -0.608072 | 229 | 1 | 0 | -4.198309 | -0.261779 | 5.326399  |
| 196 | 1 | 0 | 12.142455 | 0.409356  | 0.962340  | 230 | 1 | 0 | -1.718524 | 3.028983  | 3.782606  |
| 197 | 1 | 0 | 10.616836 | -0.388222 | 1.263409  | 231 | 1 | 0 | -3.000615 | 2.629494  | 4.942247  |
| 198 | 1 | 0 | 11.419872 | -2.394372 | 0.014375  | 232 | 1 | 0 | -1.304160 | 2.601706  | 5.414403  |
| 199 | 1 | 0 | 12.917248 | -1.569657 | -0.351559 | 233 | 1 | 0 | -0.406253 | 0.586497  | 1.494534  |

**General.** All reagents were used as purchased without further purification. All solvents were distilled and dried according to standard procedures. TLC analyses were performed on pre-coated silica gel 60F254 sheets and detection was achieved by exposure to UV light (254 nm). Flash chromatography column was carried out using silica gel (200-400 mesh).

Infrared spectra of the compounds were recorded as pressed solids using an attenuated total reflectance (ATR)-IR spectrometer. Semi-preparative HPLC was performed using C18 5 micron, 150mm × 22 mm column with a flow rate of 10 mL/min using UV detection at 254 nm. <sup>1</sup>H and <sup>13</sup>C NMR, HSQC, HMBC, TOCY, TOCSY-HSQC and ROESY spectra were recorded using 400 MHz and 600 MHz spectrometers, respectively. Circular dichroism (CD) spectra were recorded on a circular dichroism spectropolarimeter at room temperature in water.

High resolution mass spectrometry was performed on a mass spectrometer equipped with an orthogonal nanospray source operated in positive ion mode. MS/MS of Glu-fibrino peptide was used for mass calibration for a calibration range of m/z 100 - 2000. Samples were prepared in a solution containing acetonitrile and formic acid and infused into the nanospray source at a rate of 0.5 - 1 μl min<sup>-1</sup>. Optimal conditions were: capillary voltage 3000 V, source temperature 110 °C and a cone voltage of 60 V. Q1 was set to optimally pass ions from m/z 100 – 2000 and all ions transmitted into the pusher region of the TOF analyzer were scanned over the expected m/z range with a 1 s integration time. Data was acquired in continuum mode until acceptable averaged data was obtained.

Matrix assisted laser desorption/ionization time-of- flight (MALDI- TOF) was performed on a mass spectrometer operated in reflectron, positive ion mode with a N<sub>2</sub> laser. Laser power was used at the threshold level required to generate signal. Accelerating voltage was set to 28 kV.

## Complete References

- (3) Kagan, V. E. ; Tyurina, Y. Y.; Tyurin, V. A.; Konduru, N. V.;Potapovich, A. I.; Osipov, A. N.; Kisin, E. R.; Schwegler-Berry, D.; Mercer, R.; Castranova, V.; Shvedova, A. A.; *Toxicol. Lett.* **2006**, *165*, 88-100
- (23) Bardelang, D. ; Charles, L.; Finet, J.-P.; Jicsinszky, L.; Karoui, H.; Marque, S. R. A.;Monnier, V.; Rockenbauer, A.; Rosas, R.;Tordo, P. *Chem. Eur. J.* **2007**, *13*, 9344-9354
- (33) Asanuma, T. Asanuma, T; Yasui, H.; Inanami, O.; Waki, K.;Takahashi, M.; Iizuka, D.; Uemura, T.; Durand, G.; Polidori, A.; Kon, Y.; Pucci, B.; Kuwabara, M.; *Chem. Biodivers.* **2007**, *4*, 2253-2267
- (61) Frisch, M. J. T., G. W.; Schlegel, H. B.; Scuseria, G. E.; Robb, M. A.; Cheeseman, J. R.; Montgomery, J. A., Jr.; Vreven, T.; Kudin, K. N.; Burant, J. C.; Millam, J. M.; Iyengar, S. S.; Tomasi, J.; Barone, V.; Mennucci, B.; Cossi, M.; Scalmani, G.; Rega, N.; Petersson, G. A.; Nakatsuji, H.; Hada, M.; Ehara, M.; Toyota, K.; Fukuda, R.; Hasegawa, J.; Ishida, M.; Nakajima, T.; Honda, Y.; Kitao, O.; Nakai, H.; Klene, M.; Li, X.; Knox, J. E.; Hratchian, H. P.; Cross, J. B.; Bakken, V.; Adamo, C.; Jaramillo, J.; Gomperts, R.; Stratmann, R. E.; Yazyev, O.; Austin, A. J.; Cammi, R.; Pomelli, C.; Ochterski, J. W.; Ayala, P. Y.; Morokuma, K.; Voth, G. A.; Salvador, P.; Dannenberg, J. J.; Zakrzewski, V. G.; Dapprich, S.; Daniels, A. D.; Strain, M. C.; Farkas, O.; Malick, D. K.; Rabuck, A. D.; Raghavachari, K.; Foresman, J. B.; Ortiz, J. V.; Cui, Q.; Baboul, A. G.; Clifford, S.; Cioslowski, J.; Stefanov, B. B.; Liu, G.; Liashenko, A.; Piskorz, P.; Komaromi, I.; Martin, R. L.; Fox, D. J.; Keith, T.; Al-Laham, M. A.; Peng, C. Y.; Nanayakkara, A.; Challacombe, M.; Gill, P. M. W.; Johnson, B.; Chen, W.; Wong, M. W.; Gonzalez, C.; Pople, J. A. (2003) Gaussian 03 B.04 ed.; Gaussian, Inc.: Pittsburgh PA, 2003.
